# Supplementary material
Source: publisher site journal article supplement (https://www.dovepress.com/article/510752)
Supplement: Supplementary file 1 [file get_supplementary_file.php]

Supplementary Material

# Supplementary Figures and Tables

## Supplementary Figures


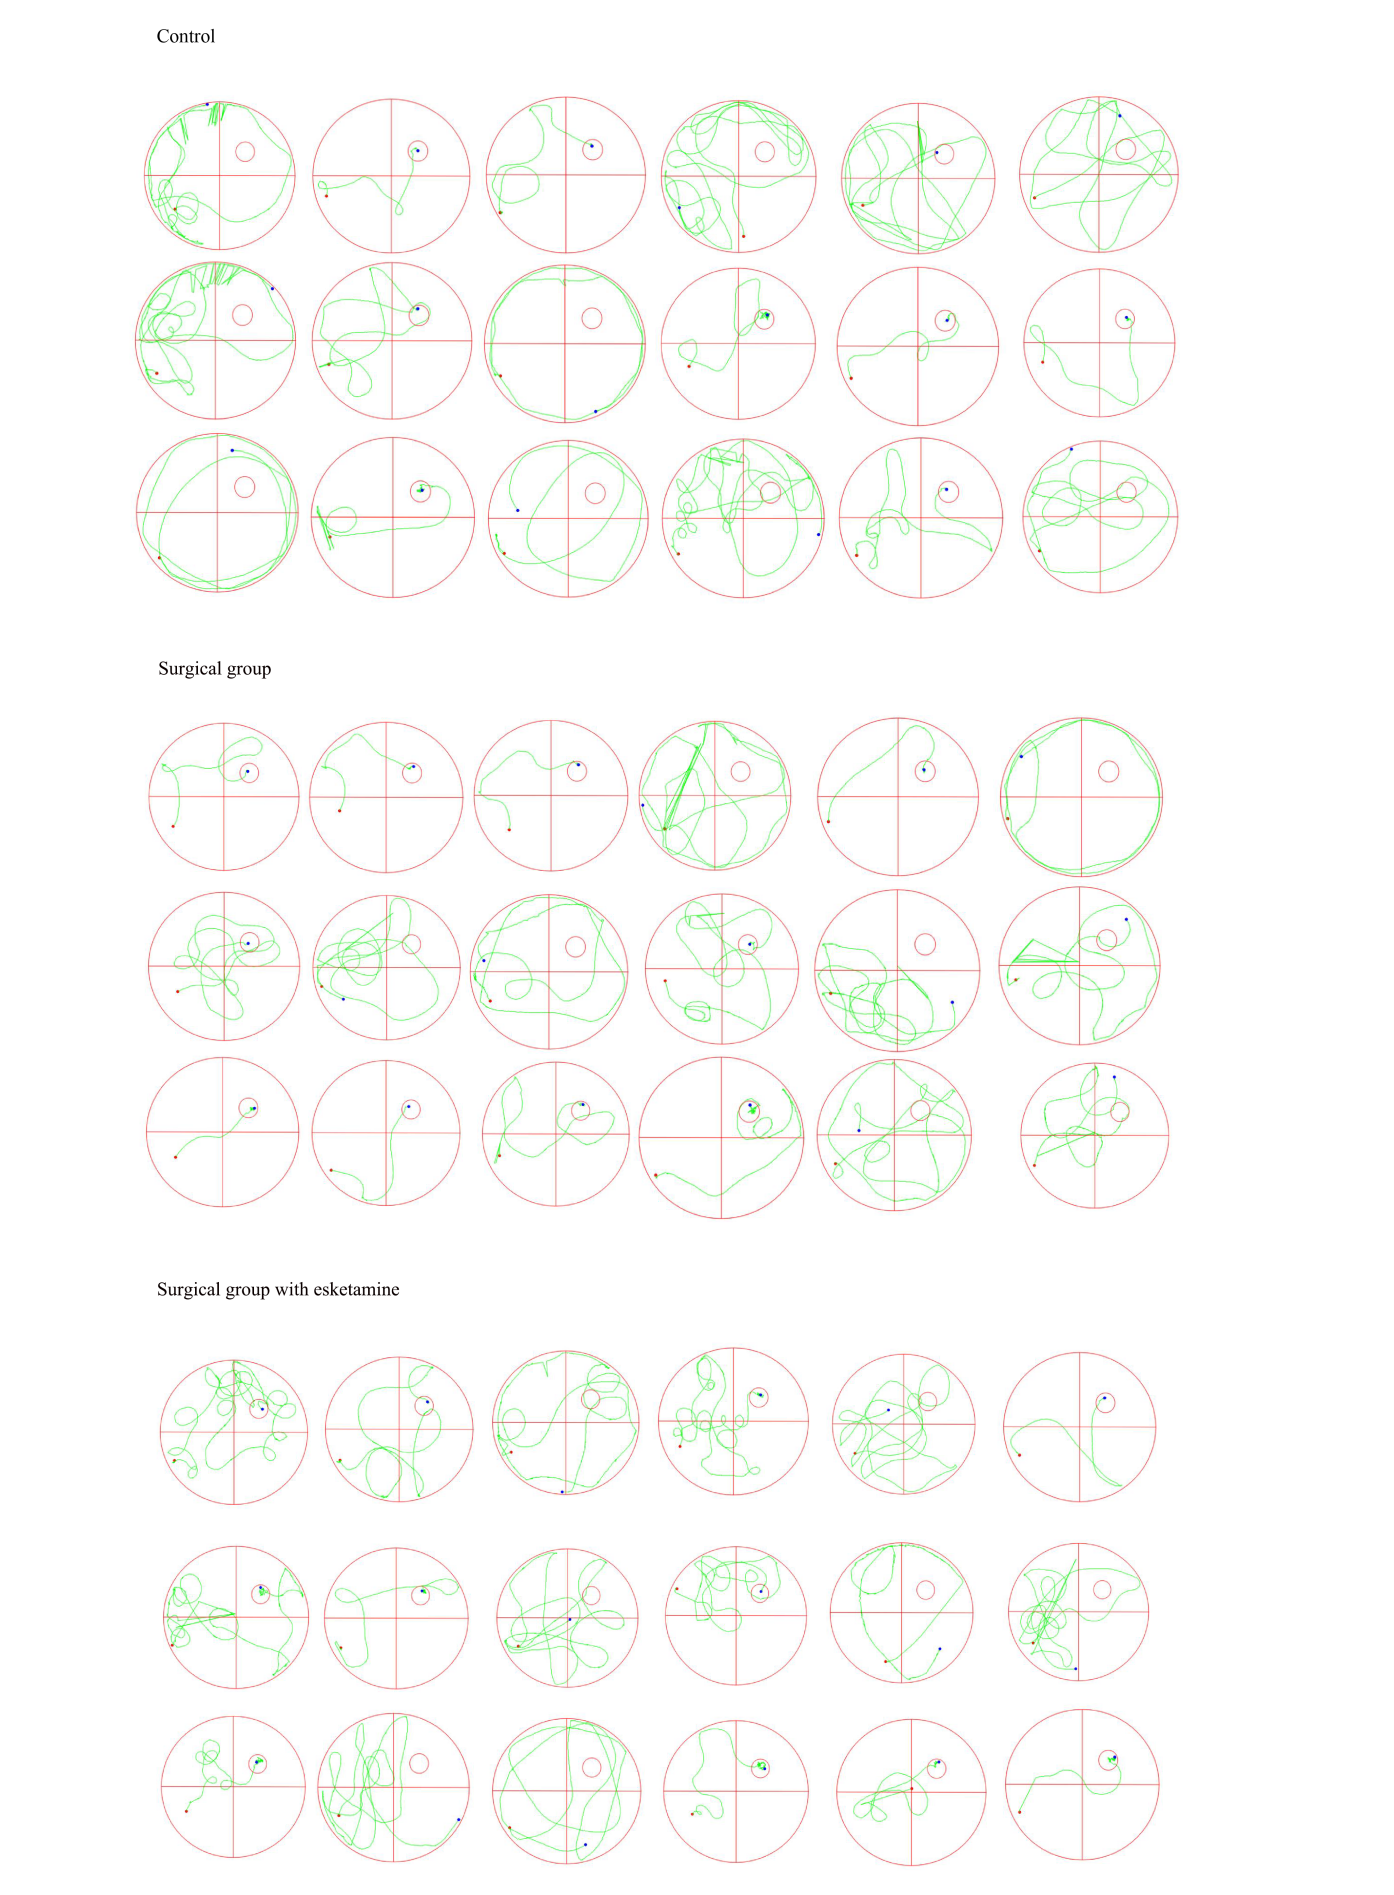


**Supplementary Figure 1.** The movement trajectories of each group of mice in the first MWM test.


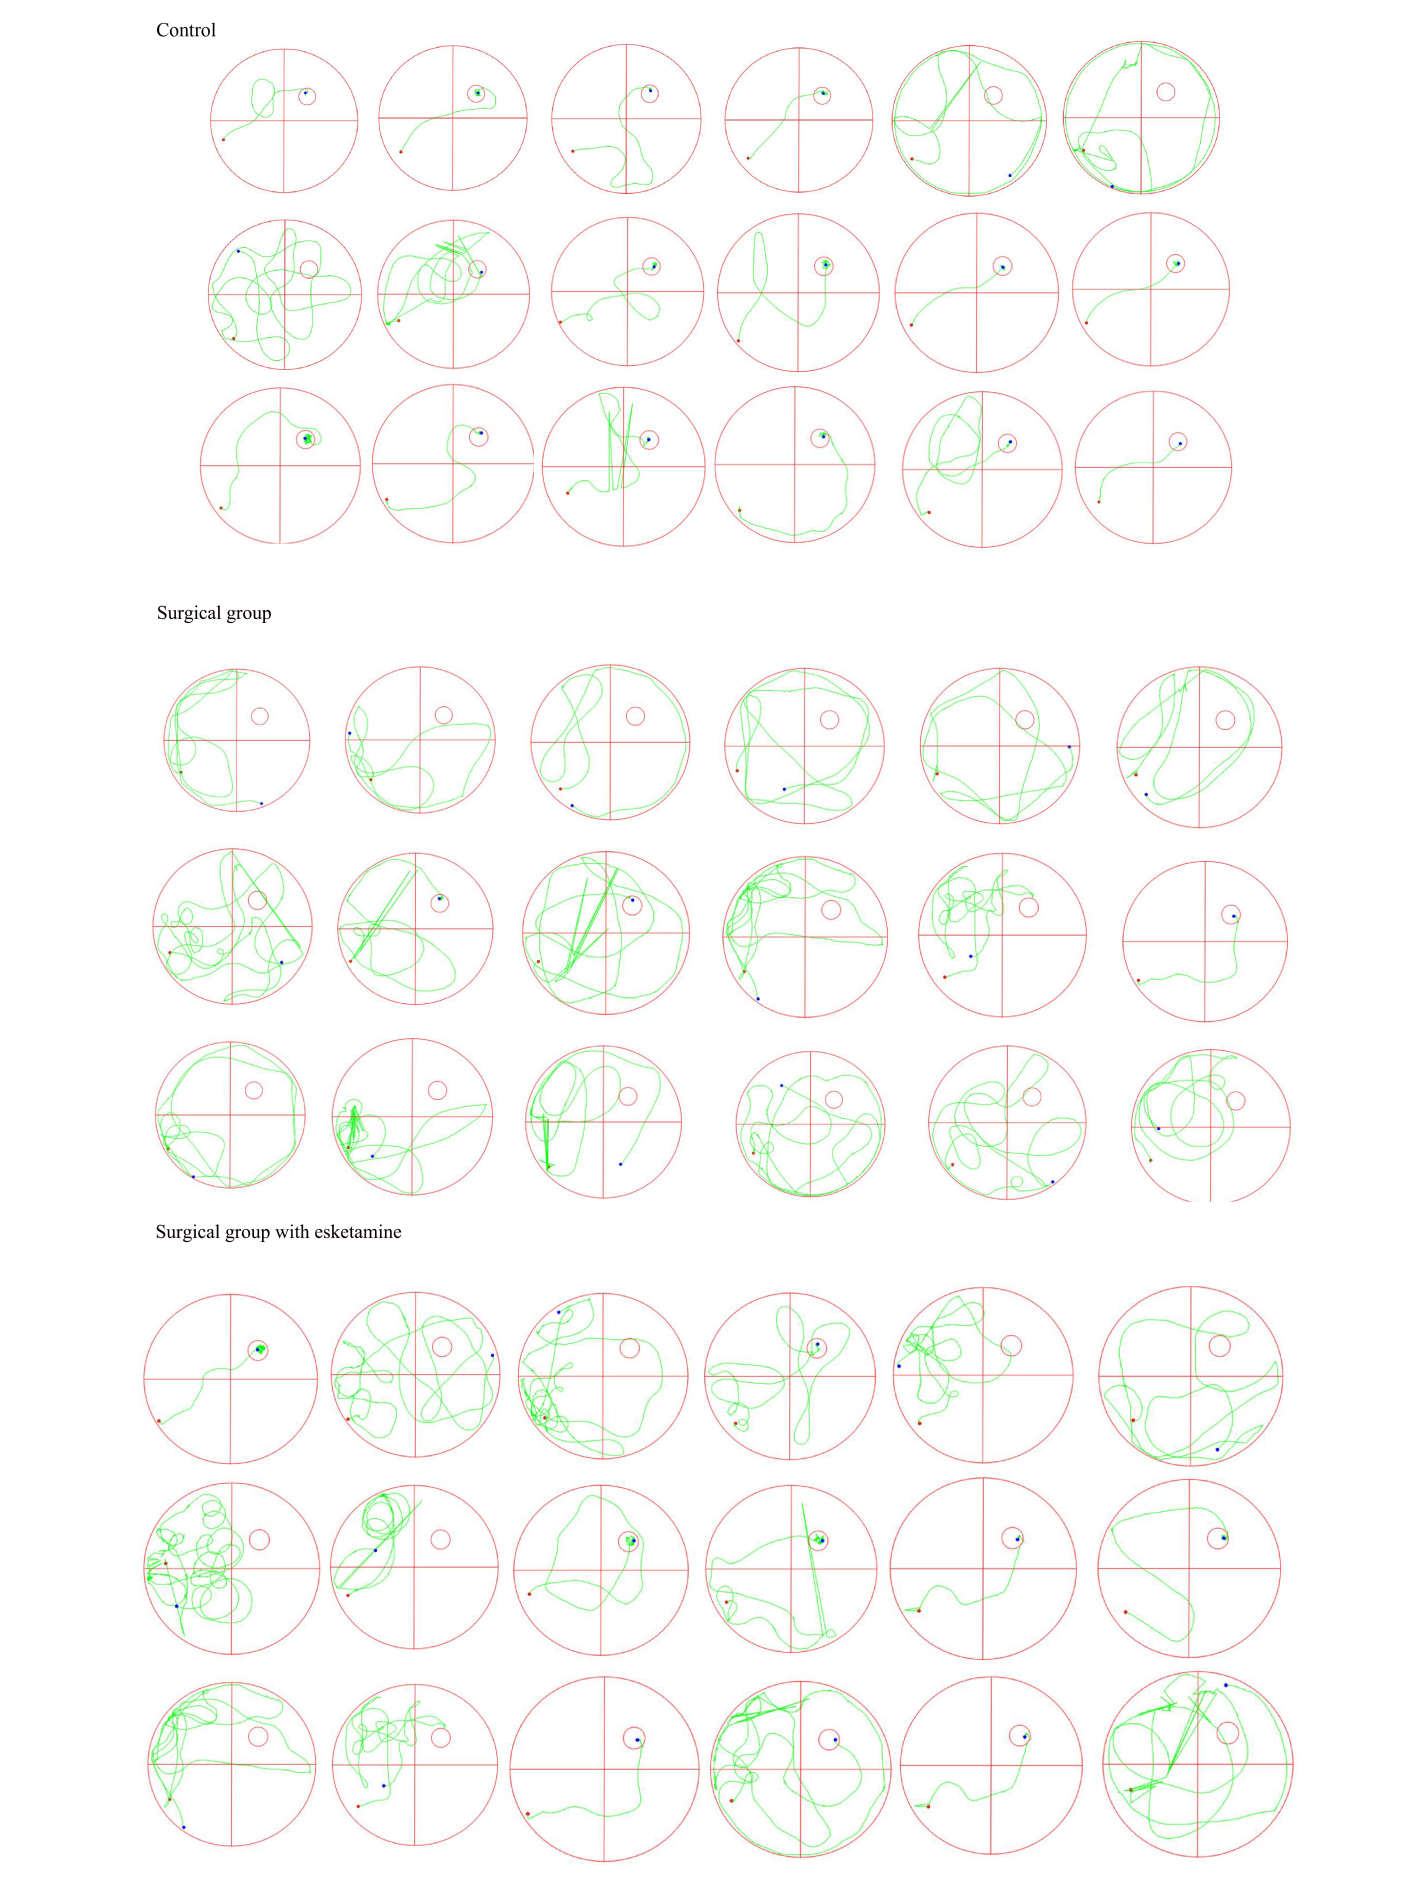


**Supplementary Figure 2.** The movement trajectories of each group of mice in the second MWM test.


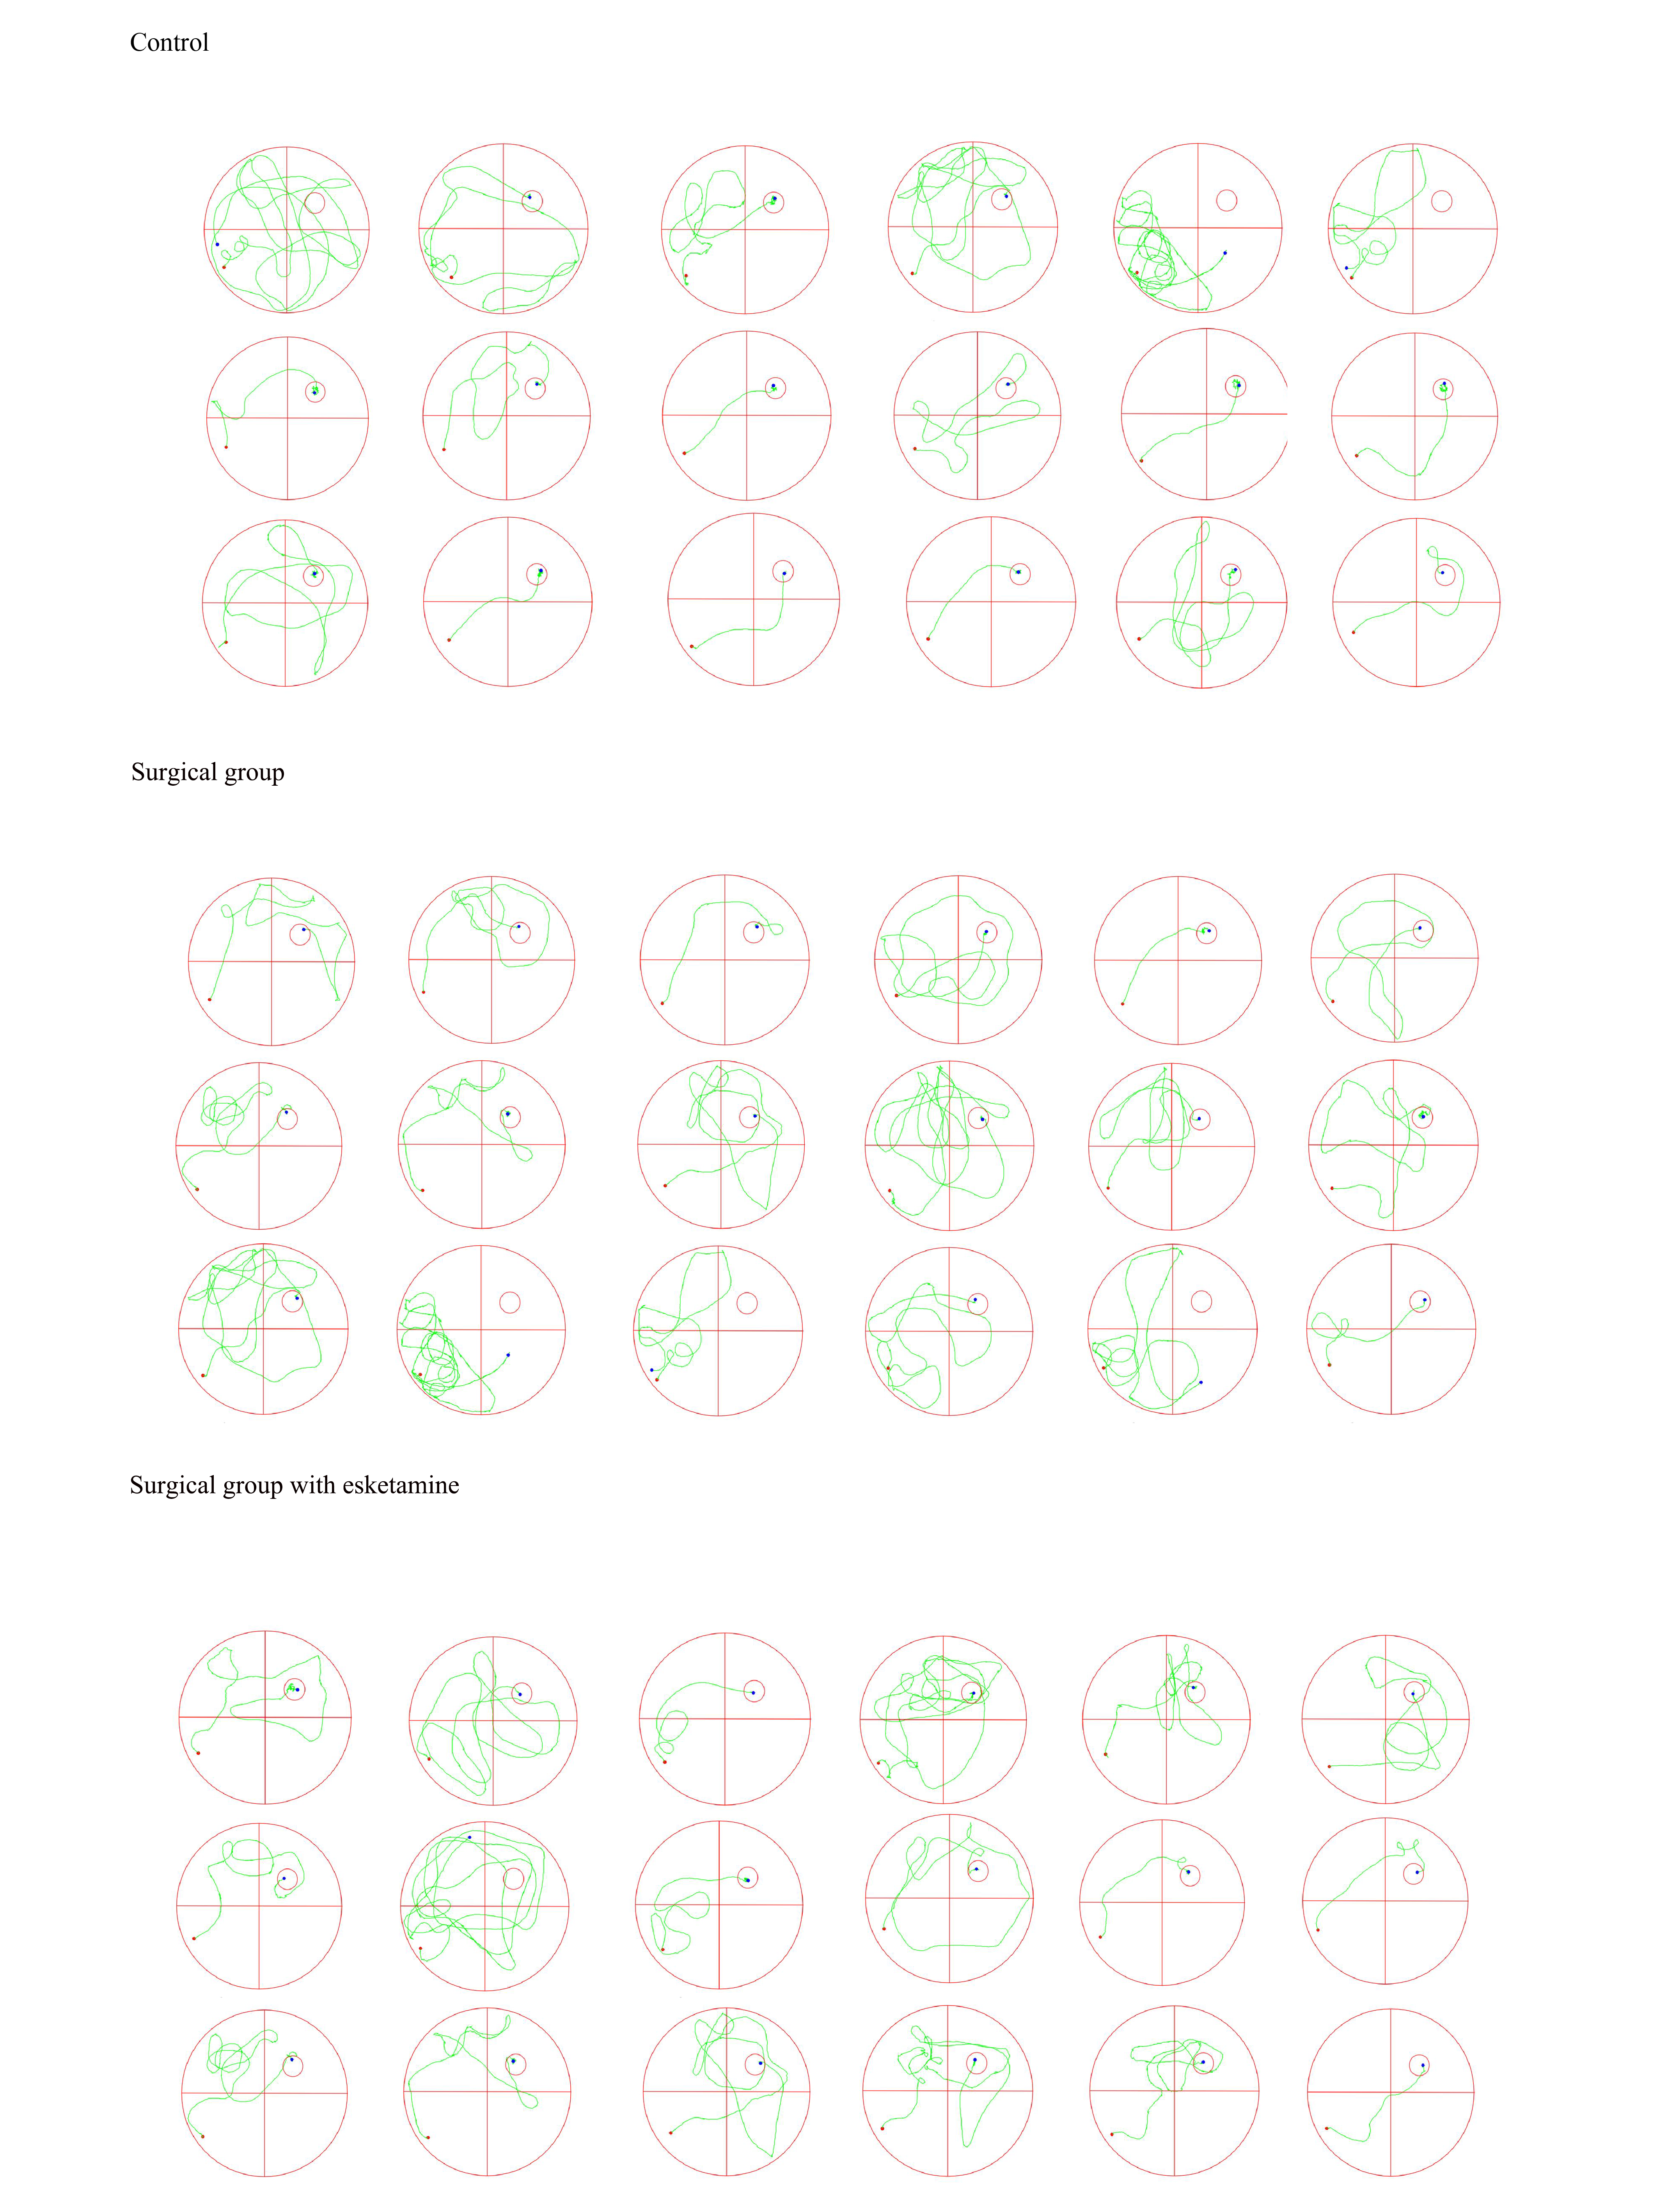


**Supplementary Figure 3.** The movement trajectories of each group of mice in the third MWM test.


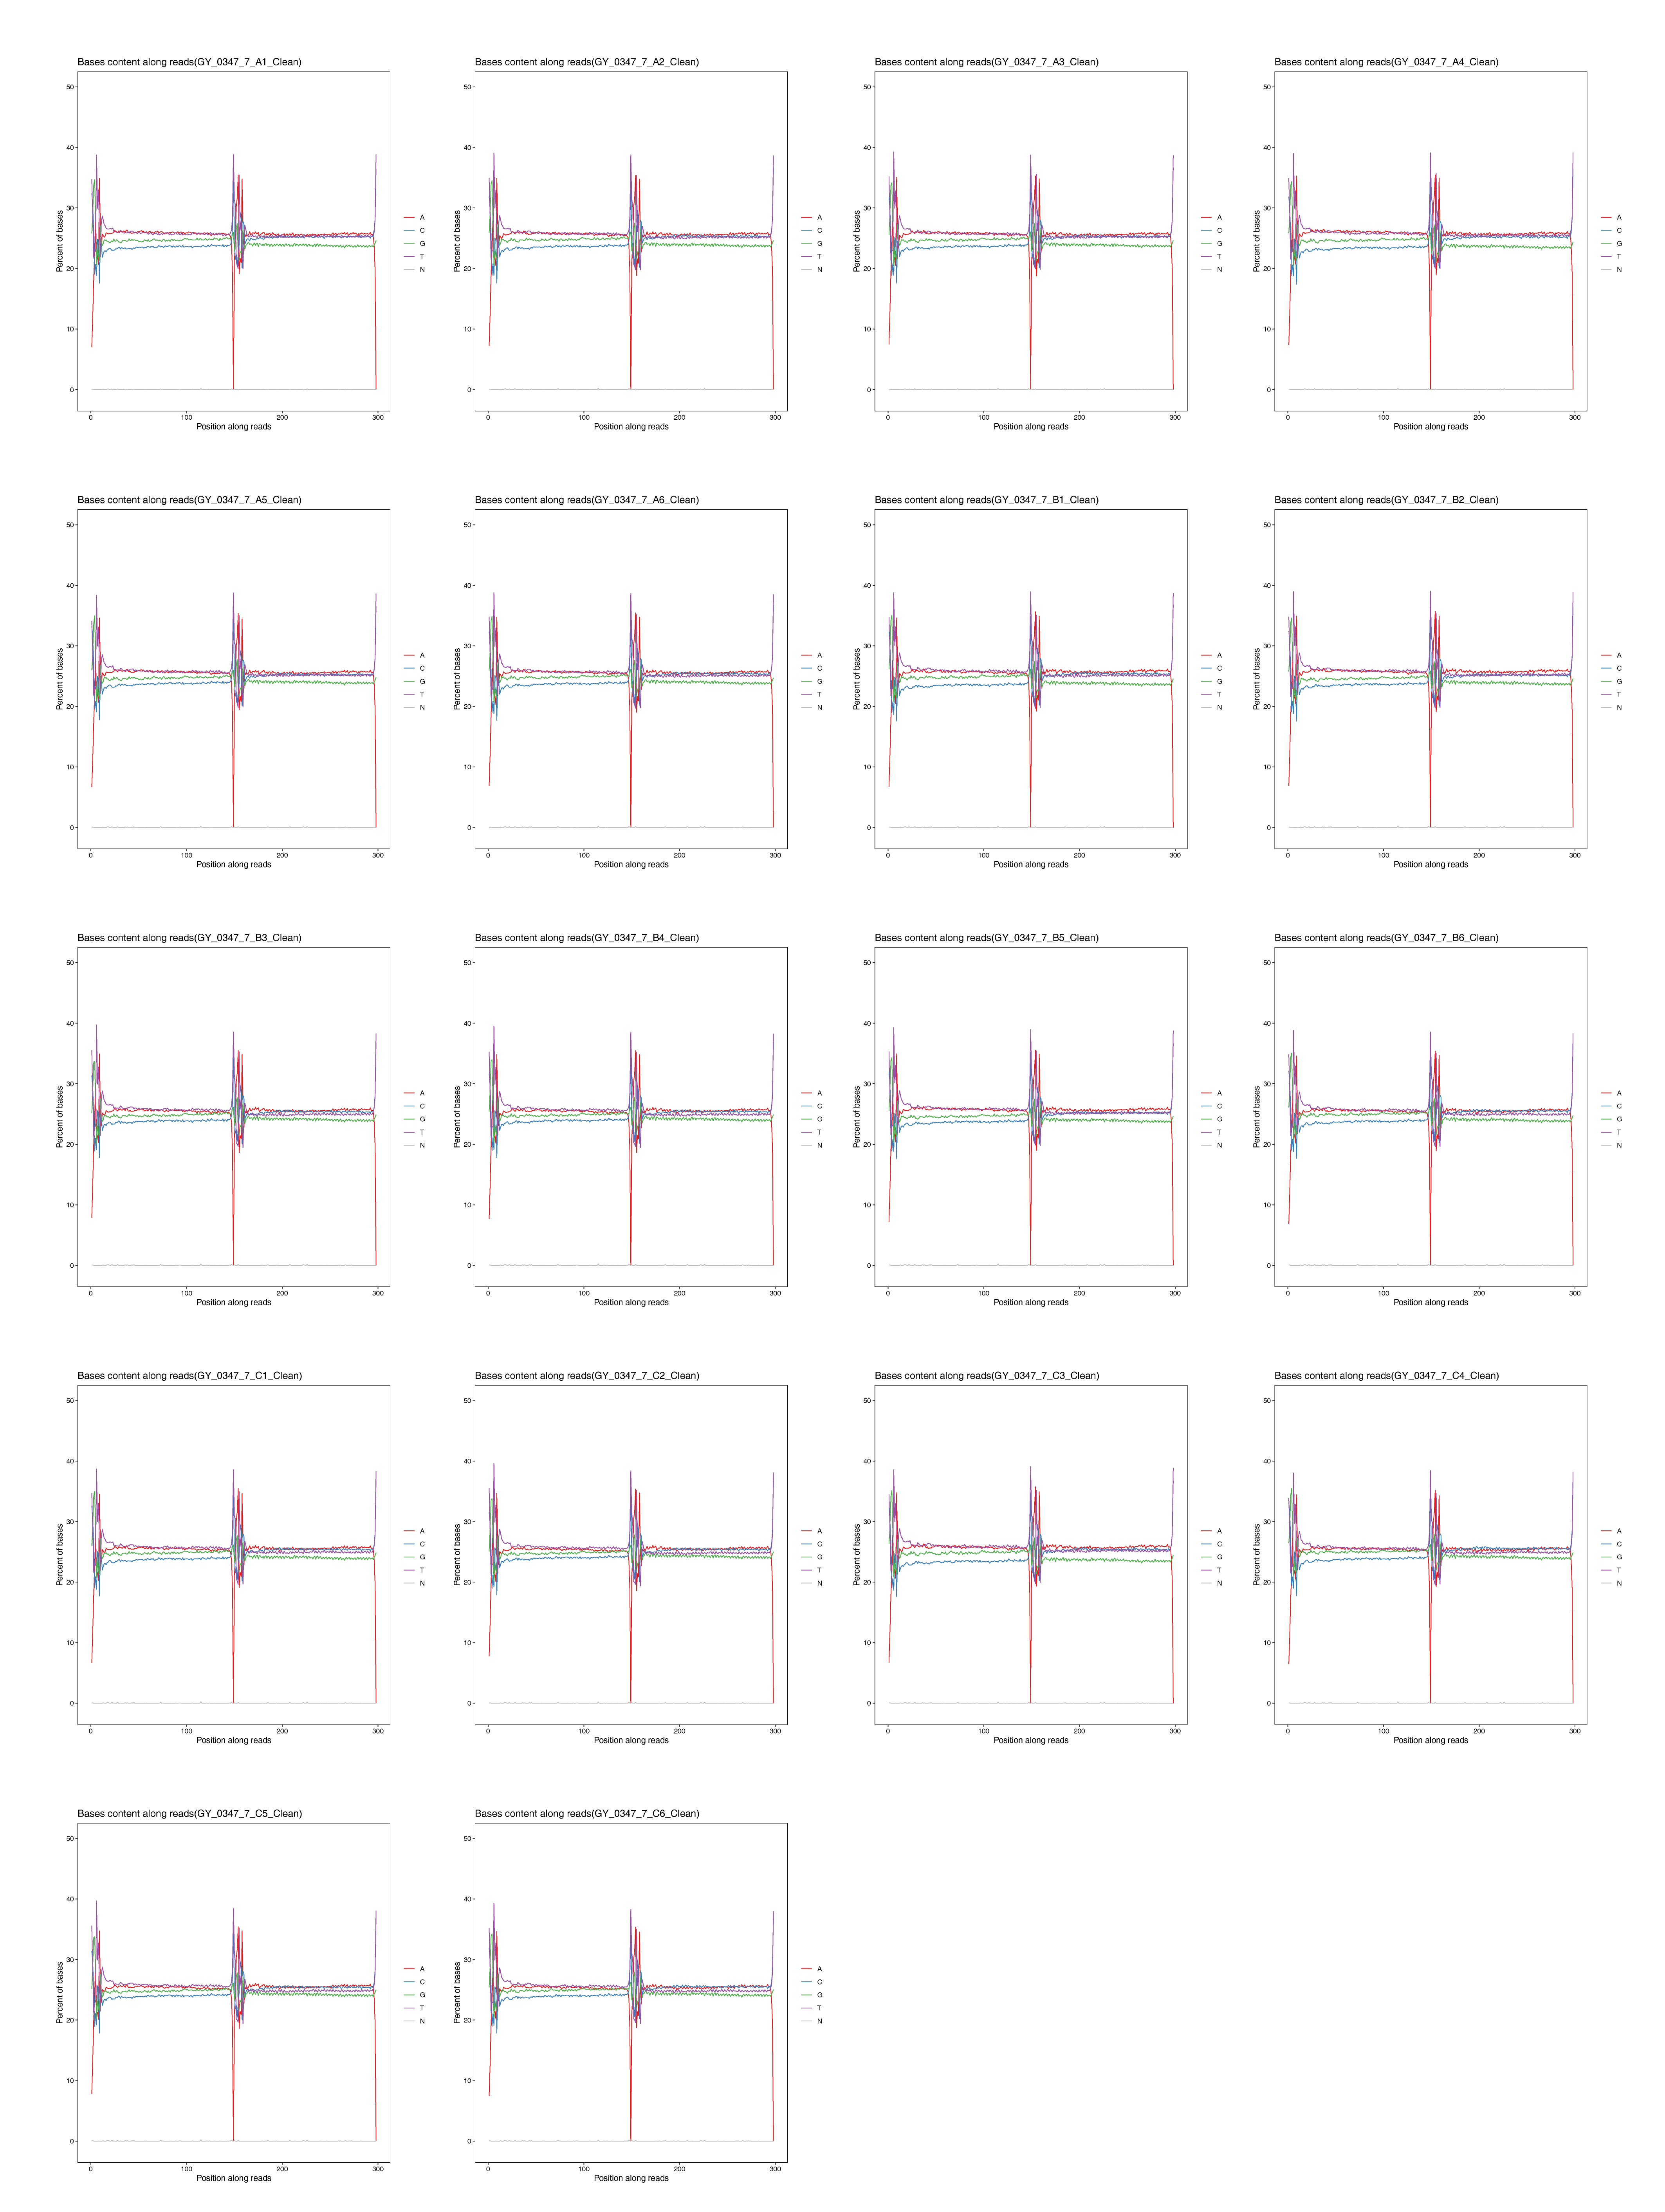


**Supplementary Figure 4.** Distribution of base types in the sample. A: control groups; B: model groups; C: intervene groups.


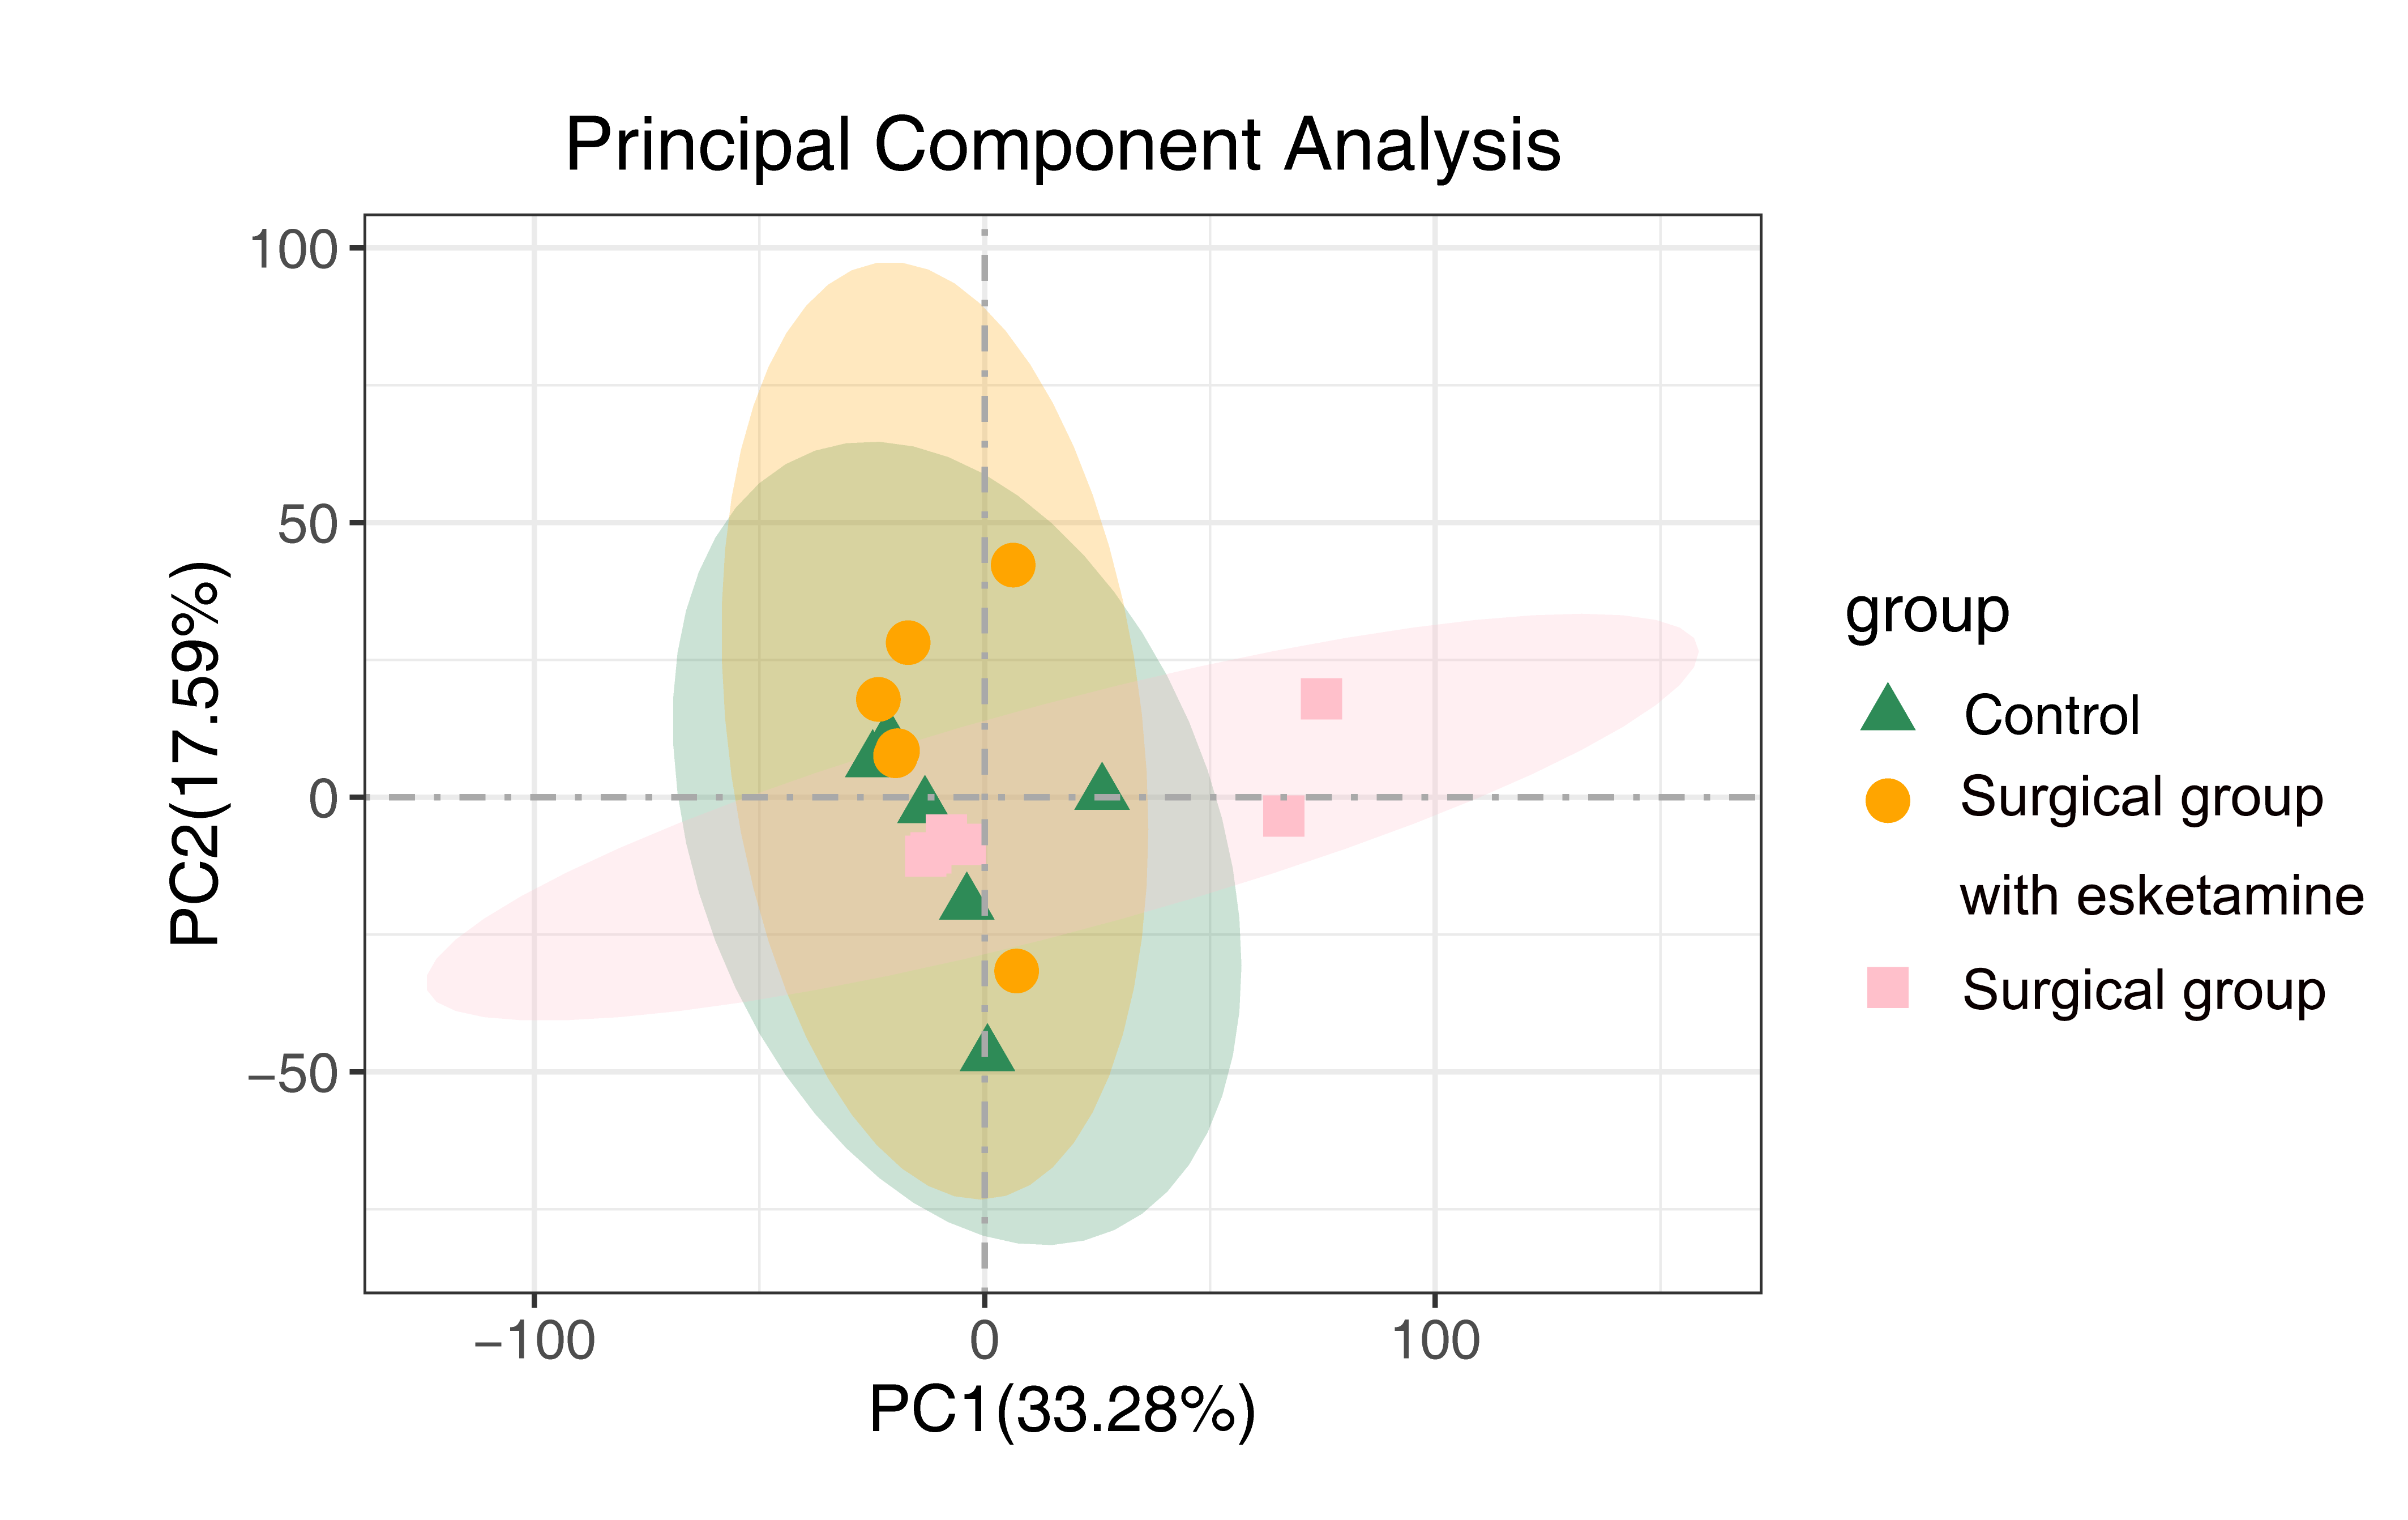


**Supplementary Figure 5.** Plotting inter-sample PCA plots for principal component visualisation.

## Supplementary Tables

**Supplementary Table 1**: Primer sequences used in this study.

| **Primers** | **Sequence** |
| --- | --- |
| M-GAPDH F | CCTTCCGTGTTCCTACCCC |
| M-GAPDH R | GCCCAAGATGCCCTTCAGT |
| Ank1 F | CTGGTGCTGTTAGGCTTCTT |
| Ank1 R | TAGAGATGGTCTCCTCGTCATC |
| Cbln4 F | ACCAGAGCCAAACCATCCAG |
| Cbln4 R | CTCCATTAGTGGCGGCTTCA |
| L1cam F | GGAACCTACAGCCTGACACC |
| L1cam R | CACTGTACTCGCCGAAGGTC |
| Gap43 F | ACCTAAGGAAAGTGCCCGAC |
| Gap43 R | GAGAGACAGGGTTCAGGTGG |
| Shh F | CCAAGCTGGTGAAGGACTTA |
| Shh R | CGTCTCGATCACGTAGAAGAC |

**Supplementary Table 2**: Sample matching rate for all data.

| Sample | Total_reads | Mapped(%) |
| --- | --- | --- |
| A1 | 42755958 | 88.17 |
| A2 | 36402010 | 89.84 |
| A3 | 36935600 | 88.34 |
| A4 | 39142128 | 88.86 |
| A5 | 41816440 | 88.09 |
| A6 | 36563332 | 89.62 |
| B1 | 38263332 | 89.46 |
| B2 | 38908324 | 89.38 |
| B3 | 37069268 | 88.17 |
| B4 | 38812376 | 88.1 |
| B5 | 39280484 | 89.72 |
| B6 | 37387762 | 87.74 |
| C1 | 38247066 | 88.34 |
| C2 | 37737712 | 88.46 |
| C3 | 38528712 | 89.08 |
| C4 | 38048778 | 88.04 |
| C5 | 36519040 | 87.34 |
| C6 | 41532148 | 88.54 |

**Supplementary Table 3**: Results of GO enrichment analysis of intersection genes.

|  | ONTOLOGY | ID | Description | GeneRatio | BgRatio | pvalue | p.adjust | qvalue | geneID | Count |
| --- | --- | --- | --- | --- | --- | --- | --- | --- | --- | --- |
| GO:0048525 | BP | GO:0048525 | negative regulation of viral process | 13/478 | 101/28943 | 1.26E-08 | 5.03E-05 | 4.09E-05 | Eif2ak2/Rsad2/Trim30d/Stat1/Trim21/Oasl1/Parp10/Sp100/Isg15/Oasl2/Ciita/Ifih1/Ccl5 | 13 |
| GO:0060562 | BP | GO:0060562 | epithelial tube morphogenesis | 24/478 | 397/28943 | 6.12E-08 | 5.67E-05 | 4.61E-05 | Foxa1/Irx1/Ret/Cxcl10/Pitx2/Gata3/Angpt1/Gbx2/Irx3/Irx2/Agt/Lef1/Wnt9b/Casr/Sfrp2/Lgr5/Fzd1/Asb2/Shh/Stil/Epha7/Edn1/Wnt2/Zeb2 | 24 |
| GO:0051607 | BP | GO:0051607 | defense response to virus | 20/478 | 289/28943 | 8.94E-08 | 5.67E-05 | 4.61E-05 | Ifit1/Cxcl10/Dtx3l/Eif2ak2/Rsad2/Ifit3/Ifit3b/Trim30d/Samhd1/Stat1/Ifit2/Trim21/Oasl1/Isg15/Parp9/Cxcl9/Oasl2/Usp29/Ifih1/Ccl5 | 20 |
| GO:0090287 | BP | GO:0090287 | regulation of cellular response to growth factor stimulus | 21/478 | 318/28943 | 9.45E-08 | 5.67E-05 | 4.61E-05 | Grem2/Tcf7l2/Gata3/Zfp423/Angpt1/Vwc2l/Xdh/Agt/Vwc2/Tfap2b/Itga3/Sfrp2/Grb10/Fzd1/Fam20c/Tmprss6/Onecut2/Fst/Runx2/Zeb2/Itga8 | 21 |
| GO:0140546 | BP | GO:0140546 | defense response to symbiont | 20/478 | 290/28943 | 9.46E-08 | 5.67E-05 | 4.61E-05 | Ifit1/Cxcl10/Dtx3l/Eif2ak2/Rsad2/Ifit3/Ifit3b/Trim30d/Samhd1/Stat1/Ifit2/Trim21/Oasl1/Isg15/Parp9/Cxcl9/Oasl2/Usp29/Ifih1/Ccl5 | 20 |
| GO:0071772 | BP | GO:0071772 | response to BMP | 16/478 | 187/28943 | 9.94E-08 | 5.67E-05 | 4.61E-05 | Grem2/Tcf7l2/Gata3/Zfp423/Vwc2l/Zcchc12/Lef1/Vwc2/Ror2/Tfap2b/Itga3/Sfrp2/Fzd1/Tmprss6/Fst/Runx2 | 16 |
| GO:0071773 | BP | GO:0071773 | cellular response to BMP stimulus | 16/478 | 187/28943 | 9.94E-08 | 5.67E-05 | 4.61E-05 | Grem2/Tcf7l2/Gata3/Zfp423/Vwc2l/Zcchc12/Lef1/Vwc2/Ror2/Tfap2b/Itga3/Sfrp2/Fzd1/Tmprss6/Fst/Runx2 | 16 |
| GO:0198738 | BP | GO:0198738 | cell-cell signaling by wnt | 25/478 | 453/28943 | 1.85E-07 | 9.26E-05 | 7.53E-05 | Fzd10/Pitx2/Fzd9/Tcf7l2/Gata3/Amotl1/Dkk2/Oprm1/Lef1/Wnt9b/Ror2/Rbms3/Itga3/Sfrp2/Lgr5/Rnf213/Grb10/Fzd1/Wif1/Cxxc4/Shh/Wnt3/Edn1/Wnt2/Zeb2 | 25 |
| GO:0030509 | BP | GO:0030509 | BMP signaling pathway | 15/478 | 176/28943 | 2.62E-07 | 0.000116387 | 9.46E-05 | Grem2/Tcf7l2/Zfp423/Vwc2l/Zcchc12/Lef1/Vwc2/Ror2/Tfap2b/Itga3/Sfrp2/Fzd1/Tmprss6/Fst/Runx2 | 15 |
| GO:0035458 | BP | GO:0035458 | cellular response to interferon-beta | 9/478 | 57/28943 | 3.78E-07 | 0.000146275 | 0.000118922 | Tgtp2/Ifit1/Ifi47/Tgtp1/Ifit3/Gbp6/Stat1/Gm4951/Irgm2 | 9 |
| GO:0009615 | BP | GO:0009615 | response to virus | 21/478 | 347/28943 | 4.03E-07 | 0.000146275 | 0.000118922 | Ifit1/Tgtp1/Cxcl10/Dtx3l/Eif2ak2/Rsad2/Ifit3/Ifit3b/Trim30d/Samhd1/Stat1/Ifit2/Trim21/Oasl1/Isg15/Parp9/Cxcl9/Oasl2/Usp29/Ifih1/Ccl5 | 21 |
| GO:0016055 | BP | GO:0016055 | Wnt signaling pathway | 24/478 | 451/28943 | 6.27E-07 | 0.000208543 | 0.000169546 | Fzd10/Pitx2/Fzd9/Tcf7l2/Gata3/Amotl1/Dkk2/Lef1/Wnt9b/Ror2/Rbms3/Itga3/Sfrp2/Lgr5/Rnf213/Grb10/Fzd1/Wif1/Cxxc4/Shh/Wnt3/Edn1/Wnt2/Zeb2 | 24 |
| GO:0035456 | BP | GO:0035456 | response to interferon-beta | 9/478 | 65/28943 | 1.19E-06 | 0.000355583 | 0.00028909 | Tgtp2/Ifit1/Ifi47/Tgtp1/Ifit3/Gbp6/Stat1/Gm4951/Irgm2 | 9 |
| GO:0030510 | BP | GO:0030510 | regulation of BMP signaling pathway | 11/478 | 104/28943 | 1.25E-06 | 0.000355583 | 0.00028909 | Grem2/Tcf7l2/Zfp423/Vwc2l/Vwc2/Tfap2b/Itga3/Sfrp2/Fzd1/Tmprss6/Fst | 11 |
| GO:0050792 | BP | GO:0050792 | regulation of viral process | 14/478 | 175/28943 | 1.40E-06 | 0.000373872 | 0.000303958 | Eif2ak2/Rsad2/Trim30d/Adarb1/Stat1/Trim21/Oasl1/Parp10/Sp100/Isg15/Oasl2/Ciita/Ifih1/Ccl5 | 14 |
| GO:0006874 | BP | GO:0006874 | cellular calcium ion homeostasis | 18/478 | 292/28943 | 2.09E-06 | 0.000520677 | 0.000423311 | Adcy8/Atp2a1/Calca/Cxcl10/Fzd9/Tmtc4/Npsr1/Camk2d/Calb2/F2r/Inpp4b/Casr/Pygm/Cxcl9/Edn1/Ccl5/Kcnh1/Ryr1 | 18 |
| GO:0055074 | BP | GO:0055074 | calcium ion homeostasis | 19/478 | 324/28943 | 2.28E-06 | 0.000535732 | 0.000435551 | Adcy8/Atp2a1/Calca/Cxcl10/Fzd9/Tmtc4/Npsr1/Camk2d/Calb2/F2r/Inpp4b/Tfap2b/Casr/Pygm/Cxcl9/Edn1/Ccl5/Kcnh1/Ryr1 | 19 |
| GO:0051146 | BP | GO:0051146 | striated muscle cell differentiation | 19/478 | 334/28943 | 3.55E-06 | 0.000787848 | 0.000640522 | Shox2/Cxcl10/Smyd1/Pitx2/Adamts15/Tnnt1/Camk2d/Irx3/Agt/Actn3/AW551984/Asb2/Shh/Cxcl9/Nox4/Mylk3/Edn1/Tmod1/Ryr1 | 19 |
| GO:0045071 | BP | GO:0045071 | negative regulation of viral genome replication | 8/478 | 58/28943 | 4.85E-06 | 0.001019702 | 0.00082902 | Eif2ak2/Rsad2/Oasl1/Parp10/Isg15/Oasl2/Ifih1/Ccl5 | 8 |
| GO:0048863 | BP | GO:0048863 | stem cell differentiation | 17/478 | 282/28943 | 5.37E-06 | 0.001072836 | 0.000872217 | Foxa1/Ret/Pitx2/Eif2ak2/Gbx2/Tal1/Sema4g/Sfrp2/Kitl/Fzd1/Shh/Wnt3/Esrrb/Edn1/Krt10/Runx2/Zeb2 | 17 |
| GO:0042692 | BP | GO:0042692 | muscle cell differentiation | 22/478 | 449/28943 | 6.90E-06 | 0.00123399 | 0.001003236 | Shox2/Cxcl10/Smyd1/Pitx2/Adamts15/Tnnt1/Camk2d/Irx3/Agt/Rora/Actn3/AW551984/Fbxo40/Asb2/Shh/Cxcl9/Nox4/Mylk3/Edn1/Tmod1/Ryr1/Itga8 | 22 |
| GO:0070371 | BP | GO:0070371 | ERK1 and ERK2 cascade | 19/478 | 350/28943 | 6.95E-06 | 0.00123399 | 0.001003236 | L1cam/Oprm1/Npsr1/Angpt1/Camk2d/Agt/F2r/Akap12/Cnksr3/Casr/Necab2/Ramp3/Btn2a2/Grb10/Nox4/Epha7/Epor/Edn1/Ccl5 | 19 |
| GO:0072503 | BP | GO:0072503 | cellular divalent inorganic cation homeostasis | 18/478 | 320/28943 | 7.45E-06 | 0.00123399 | 0.001003236 | Adcy8/Atp2a1/Calca/Cxcl10/Fzd9/Tmtc4/Npsr1/Camk2d/Calb2/F2r/Inpp4b/Casr/Pygm/Cxcl9/Edn1/Ccl5/Kcnh1/Ryr1 | 18 |
| GO:0014706 | BP | GO:0014706 | striated muscle tissue development | 17/478 | 291/28943 | 8.13E-06 | 0.00123399 | 0.001003236 | Shox2/Pitx2/Pou4f1/Angpt1/Camk2d/Irx3/Agt/Lef1/AW551984/Asb2/Eya2/Shh/Nox4/Mylk3/Epor/Edn1/Wnt2 | 17 |
| GO:0001569 | BP | GO:0001569 | branching involved in blood vessel morphogenesis | 7/478 | 45/28943 | 8.46E-06 | 0.00123399 | 0.001003236 | Pitx2/Angpt1/Gbx2/Lef1/Sfrp2/Shh/Edn1 | 7 |
| GO:1903900 | BP | GO:1903900 | regulation of viral life cycle | 12/478 | 151/28943 | 8.46E-06 | 0.00123399 | 0.001003236 | Eif2ak2/Rsad2/Trim30d/Adarb1/Trim21/Oasl1/Parp10/Isg15/Oasl2/Ciita/Ifih1/Ccl5 | 12 |
| GO:0090288 | BP | GO:0090288 | negative regulation of cellular response to growth factor stimulus | 10/478 | 104/28943 | 8.98E-06 | 0.00123399 | 0.001003236 | Grem2/Tcf7l2/Gata3/Vwc2l/Xdh/Agt/Vwc2/Sfrp2/Fzd1/Tmprss6 | 10 |
| GO:0001755 | BP | GO:0001755 | neural crest cell migration | 8/478 | 63/28943 | 9.12E-06 | 0.00123399 | 0.001003236 | Ret/Pitx2/Gbx2/Sema4g/Kitl/Shh/Edn1/Zeb2 | 8 |
| GO:0060537 | BP | GO:0060537 | muscle tissue development | 23/478 | 494/28943 | 9.80E-06 | 0.00123399 | 0.001003236 | Shox2/Smyd1/Pitx2/Tcf7l2/Pou4f1/Angpt1/Camk2d/Irx3/Agt/Lef1/Actn3/AW551984/Tfap2b/Asb2/Eya2/Shh/Nox4/Mylk3/Epor/Edn1/Wnt2/Ryr1/Itga8 | 23 |
| GO:0006875 | BP | GO:0006875 | cellular metal ion homeostasis | 21/478 | 425/28943 | 9.80E-06 | 0.00123399 | 0.001003236 | Adcy8/Atp2a1/Calca/Cxcl10/Fzd9/Tmtc4/Npsr1/Camk2d/Calb2/Agt/F2r/Inpp4b/Casr/Pygm/Cxcl9/Tmprss6/Edn1/Ccl5/Alas2/Kcnh1/Ryr1 | 21 |
| GO:0072507 | BP | GO:0072507 | divalent inorganic cation homeostasis | 19/478 | 359/28943 | 9.96E-06 | 0.00123399 | 0.001003236 | Adcy8/Atp2a1/Calca/Cxcl10/Fzd9/Tmtc4/Npsr1/Camk2d/Calb2/F2r/Inpp4b/Tfap2b/Casr/Pygm/Cxcl9/Edn1/Ccl5/Kcnh1/Ryr1 | 19 |
| GO:0001503 | BP | GO:0001503 | ossification | 21/478 | 426/28943 | 1.02E-05 | 0.00123399 | 0.001003236 | Shox2/Calca/Fzd9/Tcf7l2/Igsf10/Gpld1/Rsad2/Actn3/Scube2/Casr/Sfrp2/Nell1/Gdpd2/Fzd1/Fam20c/Shh/Isg15/Wnt3/Bmp1/Runx2/Ryr1 | 21 |
| GO:0060384 | BP | GO:0060384 | innervation | 6/478 | 31/28943 | 1.02E-05 | 0.00123399 | 0.001003236 | Ret/Pou4f1/Slitrk6/Lrig1/Adarb1/Edn1 | 6 |
| GO:0045165 | BP | GO:0045165 | cell fate commitment | 17/478 | 298/28943 | 1.11E-05 | 0.00127205 | 0.001034179 | Foxa1/Tcf7l2/Gata3/Pou4f1/Gap43/Tal1/AW551984/Wnt9b/Ror2/Sfrp2/Shh/Wnt3/Tunar/Edn1/Wnt2/Onecut2/Runx2 | 17 |
| GO:0030003 | BP | GO:0030003 | cellular cation homeostasis | 23/478 | 498/28943 | 1.11E-05 | 0.00127205 | 0.001034179 | Adcy8/Atp2a1/Calca/Cxcl10/Fzd9/Tmtc4/Npsr1/Camk2d/Calb2/Agt/F2r/Inpp4b/Tfap2b/Casr/Pygm/Rab38/Cxcl9/Tmprss6/Edn1/Ccl5/Alas2/Kcnh1/Ryr1 | 23 |
| GO:0090497 | BP | GO:0090497 | mesenchymal cell migration | 8/478 | 65/28943 | 1.16E-05 | 0.001281117 | 0.001041551 | Ret/Pitx2/Gbx2/Sema4g/Kitl/Shh/Edn1/Zeb2 | 8 |
| GO:0060070 | BP | GO:0060070 | canonical Wnt signaling pathway | 17/478 | 300/28943 | 1.21E-05 | 0.001304896 | 0.001060883 | Fzd10/Fzd9/Tcf7l2/Gata3/Dkk2/Lef1/Wnt9b/Ror2/Rbms3/Sfrp2/Lgr5/Fzd1/Shh/Wnt3/Edn1/Wnt2/Zeb2 | 17 |
| GO:0030901 | BP | GO:0030901 | midbrain development | 7/478 | 49/28943 | 1.51E-05 | 0.00158968 | 0.001292412 | Tfap2d/Wnt9b/Sfrp2/Shh/Foxb1/Wnt3/Wnt2 | 7 |
| GO:0061326 | BP | GO:0061326 | renal tubule development | 10/478 | 111/28943 | 1.60E-05 | 0.00163796 | 0.001331664 | Irx1/Gata3/Irx3/Irx2/Agt/Wnt9b/Tfap2b/Stat1/Lgr5/Shh | 10 |
| GO:0007178 | BP | GO:0007178 | transmembrane receptor protein serine/threonine kinase signaling pathway | 20/478 | 407/28943 | 1.72E-05 | 0.001718344 | 0.001397016 | Grem2/Tcf7l2/Zfp423/Vwc2l/Btbd11/Zcchc12/Lef1/Vwc2/Ror2/Tfap2b/Itga3/Sfrp2/Fzd1/Tmprss6/Inhba/Onecut2/Fst/Runx2/Zeb2/Itga8 | 20 |
| GO:0045639 | BP | GO:0045639 | positive regulation of myeloid cell differentiation | 10/478 | 113/28943 | 1.87E-05 | 0.001822711 | 0.001481867 | Calca/Pou4f1/Lef1/Tal1/Ror2/Stat1/Kitl/Isg15/Inhba/Ccl5 | 10 |
| GO:0001656 | BP | GO:0001656 | metanephros development | 9/478 | 91/28943 | 2.01E-05 | 0.001906413 | 0.001549917 | Irx1/Ret/Gata3/Irx3/Irx2/Wnt9b/Tfap2b/Shh/Itga8 | 9 |
| GO:0034341 | BP | GO:0034341 | response to interferon-gamma | 11/478 | 139/28943 | 2.08E-05 | 0.001934018 | 0.00157236 | Tgtp1/Gbp6/Socs1/Parp14/Stat1/Trim21/Sp100/Parp9/Irgm2/Ciita/Ccl5 | 11 |
| GO:0021536 | BP | GO:0021536 | diencephalon development | 8/478 | 72/28943 | 2.48E-05 | 0.002247302 | 0.00182706 | Pitx2/Tcf7l2/Pou4f1/Gbx2/Nhlh2/Shh/Foxb1/Zeb2 | 8 |
| GO:0001505 | BP | GO:0001505 | regulation of neurotransmitter levels | 15/478 | 255/28943 | 2.53E-05 | 0.002248857 | 0.001828325 | Grin3a/Chrna3/Slc17a6/Glra3/Slc6a11/Chrna4/Mctp2/Syt9/Chrnb3/Baiap3/Unc13c/Grm4/Vamp1/Ache/Kcnh1 | 15 |
| GO:0030111 | BP | GO:0030111 | regulation of Wnt signaling pathway | 17/478 | 319/28943 | 2.65E-05 | 0.002303826 | 0.001873014 | Fzd9/Tcf7l2/Dkk2/Lef1/Ror2/Rbms3/Itga3/Sfrp2/Lgr5/Rnf213/Grb10/Fzd1/Wif1/Cxxc4/Shh/Wnt3/Zeb2 | 17 |
| GO:0045069 | BP | GO:0045069 | regulation of viral genome replication | 9/478 | 95/28943 | 2.84E-05 | 0.002409761 | 0.00195914 | Eif2ak2/Rsad2/Adarb1/Oasl1/Parp10/Isg15/Oasl2/Ifih1/Ccl5 | 9 |
| GO:0007409 | BP | GO:0007409 | axonogenesis | 22/478 | 493/28943 | 2.90E-05 | 0.002416235 | 0.001964403 | Shox2/Ret/Ntng1/L1cam/Gata3/Slitrk6/Gbx2/Dpysl5/Gap43/Nefh/Sema4g/Adarb1/Cckar/Ache/Shh/Foxb1/Wnt3/Epha8/Epha7/Edn1/Zeb2/Robo3 | 22 |
| GO:0072079 | BP | GO:0072079 | nephron tubule formation | 5/478 | 23/28943 | 3.17E-05 | 0.002580249 | 0.002097747 | Irx1/Gata3/Irx3/Irx2/Wnt9b | 5 |
| GO:0035563 | BP | GO:0035563 | positive regulation of chromatin binding | 4/478 | 12/28943 | 3.27E-05 | 0.002614301 | 0.002125431 | Dtx3l/Zfp618/Tunar/Parp9 | 4 |
| GO:0007188 | BP | GO:0007188 | adenylate cyclase-modulating G protein-coupled receptor signaling pathway | 14/478 | 231/28943 | 3.38E-05 | 0.002649821 | 0.002154309 | Adcy8/Vipr2/Calca/Cxcl10/Oprm1/Rit2/Akap12/Casr/Grm4/Ramp3/Mrap2/Cxcl9/Edn1/Adgrd1 | 14 |
| GO:0030514 | BP | GO:0030514 | negative regulation of BMP signaling pathway | 7/478 | 57/28943 | 4.16E-05 | 0.003131161 | 0.00254564 | Grem2/Tcf7l2/Vwc2l/Vwc2/Sfrp2/Fzd1/Tmprss6 | 7 |
| GO:0035567 | BP | GO:0035567 | non-canonical Wnt signaling pathway | 7/478 | 57/28943 | 4.16E-05 | 0.003131161 | 0.00254564 | Fzd10/Fzd9/Wnt9b/Ror2/Sfrp2/Rnf213/Fzd1 | 7 |
| GO:0001667 | BP | GO:0001667 | ameboidal-type cell migration | 21/478 | 471/28943 | 4.45E-05 | 0.003231018 | 0.002626823 | Ret/Calca/Pitx2/Gata3/Has1/Amotl1/Gpld1/Angpt1/Gbx2/Sparc/Agt/Akap12/Sema4g/Itga3/Hspb1/Kitl/Shh/Sp100/Edn1/Zeb2/Timp1 | 21 |
| GO:0071805 | BP | GO:0071805 | potassium ion transmembrane transport | 13/478 | 207/28943 | 4.45E-05 | 0.003231018 | 0.002626823 | Hcn4/Kcnj16/Kcnn3/Gal/Kcnj5/Kcnc2/Kcng4/Kcnj12/Hcn3/Kcnt2/Lrrc26/Kcnh1/Kcnh7 | 13 |
| GO:0048562 | BP | GO:0048562 | embryonic organ morphogenesis | 17/478 | 333/28943 | 4.55E-05 | 0.003241954 | 0.002635714 | Shox2/Pitx2/Tcf7l2/Gata3/Slitrk6/Tmie/Gbx2/Lrig1/Wnt9b/Ror2/Asb2/Lhfpl5/Shh/Stil/Edn1/Runx2/Itga8 | 17 |
| GO:0090092 | BP | GO:0090092 | regulation of transmembrane receptor protein serine/threonine kinase signaling pathway | 15/478 | 273/28943 | 5.54E-05 | 0.003881112 | 0.003155351 | Grem2/Tcf7l2/Zfp423/Vwc2l/Vwc2/Tfap2b/Itga3/Sfrp2/Fzd1/Tmprss6/Inhba/Onecut2/Fst/Zeb2/Itga8 | 15 |
| GO:0042476 | BP | GO:0042476 | odontogenesis | 10/478 | 129/28943 | 5.87E-05 | 0.003971404 | 0.003228758 | Pitx2/Tcf7l2/Edaradd/Lef1/Fam20c/Shh/Inhba/Edn1/Fst/Runx2 | 10 |
| GO:0006836 | BP | GO:0006836 | neurotransmitter transport | 14/478 | 243/28943 | 5.87E-05 | 0.003971404 | 0.003228758 | Grin3a/Chrna3/Slc17a6/Glra3/Slc6a11/Chrna4/Mctp2/Syt9/Chrnb3/Baiap3/Unc13c/Grm4/Vamp1/Kcnh1 | 14 |
| GO:0006813 | BP | GO:0006813 | potassium ion transport | 14/478 | 244/28943 | 6.13E-05 | 0.004081646 | 0.003318385 | Hcn4/Kcnj16/Kcnn3/Gal/Kcnj5/Kcnc2/Kcng4/Kcnj12/Hcn3/Cckar/Kcnt2/Lrrc26/Kcnh1/Kcnh7 | 14 |
| GO:0048762 | BP | GO:0048762 | mesenchymal cell differentiation | 14/478 | 245/28943 | 6.41E-05 | 0.004152963 | 0.003376366 | Foxa1/Ret/Pitx2/Tcf7l2/Gata3/Gbx2/Lef1/Sema4g/Sfrp2/Kitl/Shh/Edn1/Wnt2/Zeb2 | 14 |
| GO:1904948 | BP | GO:1904948 | midbrain dopaminergic neuron differentiation | 4/478 | 14/28943 | 6.45E-05 | 0.004152963 | 0.003376366 | Wnt9b/Sfrp2/Wnt3/Wnt2 | 4 |
| GO:0007269 | BP | GO:0007269 | neurotransmitter secretion | 12/478 | 186/28943 | 6.71E-05 | 0.004183584 | 0.003401261 | Grin3a/Chrna3/Glra3/Chrna4/Mctp2/Syt9/Chrnb3/Baiap3/Unc13c/Grm4/Vamp1/Kcnh1 | 12 |
| GO:0099643 | BP | GO:0099643 | signal release from synapse | 12/478 | 186/28943 | 6.71E-05 | 0.004183584 | 0.003401261 | Grin3a/Chrna3/Glra3/Chrna4/Mctp2/Syt9/Chrnb3/Baiap3/Unc13c/Grm4/Vamp1/Kcnh1 | 12 |
| GO:0001838 | BP | GO:0001838 | embryonic epithelial tube formation | 11/478 | 159/28943 | 7.17E-05 | 0.004356973 | 0.003542226 | Irx1/Ret/Gata3/Irx3/Irx2/Wnt9b/Sfrp2/Fzd1/Shh/Stil/Zeb2 | 11 |
| GO:0045778 | BP | GO:0045778 | positive regulation of ossification | 7/478 | 62/28943 | 7.20E-05 | 0.004356973 | 0.003542226 | Fzd9/Actn3/Scube2/Nell1/Fam20c/Isg15/Runx2 | 7 |
| GO:0016331 | BP | GO:0016331 | morphogenesis of embryonic epithelium | 12/478 | 188/28943 | 7.43E-05 | 0.004410591 | 0.003585818 | Irx1/Ret/Gata3/Irx3/Irx2/Wnt9b/Sfrp2/Fzd1/Shh/Stil/Wnt2/Zeb2 | 12 |
| GO:2000027 | BP | GO:2000027 | regulation of animal organ morphogenesis | 10/478 | 133/28943 | 7.59E-05 | 0.004410591 | 0.003585818 | Gata3/Agt/Wnt9b/Ror2/Sfrp2/Fzd1/Shh/Edn1/Wnt2/Runx2 | 10 |
| GO:0001763 | BP | GO:0001763 | morphogenesis of a branching structure | 14/478 | 249/28943 | 7.62E-05 | 0.004410591 | 0.003585818 | Foxa1/Shox2/Pitx2/Angpt1/Gbx2/Agt/Lef1/Wnt9b/Casr/Sfrp2/Shh/Epha7/Edn1/Wnt2 | 14 |
| GO:0072006 | BP | GO:0072006 | nephron development | 11/478 | 161/28943 | 8.03E-05 | 0.00457896 | 0.003722702 | Irx1/Ret/Gata3/Angpt1/Irx3/Irx2/Agt/Wnt9b/Tfap2b/Itga3/Shh | 11 |
| GO:0007389 | BP | GO:0007389 | pattern specification process | 21/478 | 493/28943 | 8.49E-05 | 0.0047742 | 0.003881433 | Foxa1/Irx1/Pitx2/Grem2/Gbx2/Irx3/Irx2/Lef1/Ror2/Sfrp2/Asb2/Shh/Foxb1/Wnt3/Stil/Bmp1/Edn1/Wnt2/Sp8/Fst/Zeb2 | 21 |
| GO:0048754 | BP | GO:0048754 | branching morphogenesis of an epithelial tube | 12/478 | 191/28943 | 8.65E-05 | 0.004794653 | 0.003898061 | Foxa1/Pitx2/Angpt1/Gbx2/Agt/Lef1/Wnt9b/Casr/Sfrp2/Shh/Edn1/Wnt2 | 12 |
| GO:0060415 | BP | GO:0060415 | muscle tissue morphogenesis | 8/478 | 86/28943 | 8.98E-05 | 0.00491062 | 0.003992343 | Shox2/Pitx2/Pou4f1/Angpt1/Adarb1/Fzd1/Epor/Wnt2 | 8 |
| GO:0003002 | BP | GO:0003002 | regionalization | 18/478 | 389/28943 | 9.67E-05 | 0.005180337 | 0.004211623 | Foxa1/Irx1/Pitx2/Grem2/Gbx2/Irx3/Irx2/Lef1/Ror2/Sfrp2/Shh/Foxb1/Wnt3/Bmp1/Edn1/Wnt2/Sp8/Zeb2 | 18 |
| GO:0016079 | BP | GO:0016079 | synaptic vesicle exocytosis | 10/478 | 137/28943 | 9.73E-05 | 0.005180337 | 0.004211623 | Grin3a/Chrna3/Glra3/Chrna4/Syt9/Chrnb3/Unc13c/Grm4/Vamp1/Kcnh1 | 10 |
| GO:0021700 | BP | GO:0021700 | developmental maturation | 17/478 | 355/28943 | 9.95E-05 | 0.00522875 | 0.004250983 | Foxa1/Ret/Calca/Gata3/Mreg/Gal/Baiap3/Actn3/Tal1/Unc13c/Fam20c/Rab38/Epha8/Edn1/Runx2/Ryr1/Dazl | 17 |
| GO:0001655 | BP | GO:0001655 | urogenital system development | 18/478 | 391/28943 | 0.00010317 | 0.005292398 | 0.004302729 | Foxa1/Irx1/Ret/Gata3/Angpt1/Irx3/Irx2/Agt/Wnt9b/Tfap2b/Itga3/Stat1/Lgr5/Shh/Foxb1/Cyp4a10/Epha7/Itga8 | 18 |
| GO:0008277 | BP | GO:0008277 | regulation of G protein-coupled receptor signaling pathway | 10/478 | 138/28943 | 0.000103383 | 0.005292398 | 0.004302729 | Calca/Oprm1/Necab2/Ramp3/Kctd8/Mrap2/Edn1/Ccl5/Arr3/Kctd16 | 10 |
| GO:0071542 | BP | GO:0071542 | dopaminergic neuron differentiation | 6/478 | 46/28943 | 0.000105239 | 0.005319232 | 0.004324544 | Foxa1/Wnt9b/Sfrp2/Shh/Wnt3/Wnt2 | 6 |
| GO:0014032 | BP | GO:0014032 | neural crest cell development | 8/478 | 89/28943 | 0.000114461 | 0.005713053 | 0.004644722 | Ret/Pitx2/Gbx2/Sema4g/Kitl/Shh/Edn1/Zeb2 | 8 |
| GO:0030178 | BP | GO:0030178 | negative regulation of Wnt signaling pathway | 11/478 | 168/28943 | 0.0001174 | 0.005787395 | 0.004705162 | Tcf7l2/Dkk2/Ror2/Rbms3/Sfrp2/Rnf213/Grb10/Fzd1/Wif1/Cxxc4/Shh | 11 |
| GO:0070372 | BP | GO:0070372 | regulation of ERK1 and ERK2 cascade | 16/478 | 326/28943 | 0.000119367 | 0.005812609 | 0.004725661 | L1cam/Oprm1/Npsr1/Angpt1/Camk2d/F2r/Akap12/Cnksr3/Casr/Necab2/Ramp3/Btn2a2/Nox4/Epha7/Epor/Ccl5 | 16 |
| GO:0042391 | BP | GO:0042391 | regulation of membrane potential | 20/478 | 469/28943 | 0.000122614 | 0.005886807 | 0.004785984 | Hcn4/Tafa4/Cbln1/Chrna3/Glra3/Oprm1/Chrna4/Camk2d/Gabrq/Agt/Kcnj5/Chrnb3/Grin2d/Kcnc2/Hcn3/Hebp2/Ccn6/Edn1/Kcnh1/Kcnh7 | 20 |
| GO:0033627 | BP | GO:0033627 | cell adhesion mediated by integrin | 8/478 | 90/28943 | 0.00012384 | 0.005886807 | 0.004785984 | Ret/L1cam/Itga3/Epha8/Itga7/Ccl5/Itga5/Itga8 | 8 |
| GO:0072175 | BP | GO:0072175 | epithelial tube formation | 11/478 | 170/28943 | 0.000130375 | 0.006124545 | 0.004979266 | Irx1/Ret/Gata3/Irx3/Irx2/Wnt9b/Sfrp2/Fzd1/Shh/Stil/Zeb2 | 11 |
| GO:0035455 | BP | GO:0035455 | response to interferon-alpha | 5/478 | 31/28943 | 0.000143399 | 0.006632233 | 0.005392017 | Ifit1/Tgtp1/Eif2ak2/Ifit3/Ifit2 | 5 |
| GO:0061333 | BP | GO:0061333 | renal tubule morphogenesis | 8/478 | 92/28943 | 0.000144504 | 0.006632233 | 0.005392017 | Irx1/Gata3/Irx3/Irx2/Agt/Wnt9b/Lgr5/Shh | 8 |
| GO:0033674 | BP | GO:0033674 | positive regulation of kinase activity | 19/478 | 440/28943 | 0.000153386 | 0.006937312 | 0.005640046 | Adcy8/Fzd10/Ret/Calca/Chrna3/Angpt1/Agt/Socs1/Vav3/Ror2/Kitl/Epha8/Stil/Insrr/Nox4/Epha7/Edn1/Zeb2/Clspn | 19 |
| GO:0035282 | BP | GO:0035282 | segmentation | 9/478 | 118/28943 | 0.000154626 | 0.006937312 | 0.005640046 | Irx1/Irx3/Irx2/Lef1/Ror2/Sfrp2/Shh/Foxb1/Zeb2 | 9 |
| GO:0048644 | BP | GO:0048644 | muscle organ morphogenesis | 8/478 | 94/28943 | 0.000167929 | 0.007392752 | 0.00601032 | Shox2/Pitx2/Pou4f1/Angpt1/Adarb1/Fzd1/Epor/Wnt2 | 8 |
| GO:0007517 | BP | GO:0007517 | muscle organ development | 17/478 | 371/28943 | 0.00016848 | 0.007392752 | 0.00601032 | Shox2/Smyd1/Pitx2/Tcf7l2/Pou4f1/Angpt1/Zfhx3/Lef1/Actn3/Adarb1/Fzd1/Asb2/Shh/Epor/Wnt2/Jph1/Ryr1 | 17 |
| GO:0061351 | BP | GO:0061351 | neural precursor cell proliferation | 12/478 | 206/28943 | 0.000176195 | 0.007647234 | 0.006217214 | Cntnap4/Fzd9/Zfp423/Gbx2/Tafa3/Rora/Fabp7/Lef1/Zfp503/Shh/Wnt2/Zeb2 | 12 |
| GO:0060485 | BP | GO:0060485 | mesenchyme development | 15/478 | 304/28943 | 0.000182297 | 0.007827011 | 0.006363373 | Foxa1/Ret/Pitx2/Tcf7l2/Gata3/Gbx2/Lef1/Sema4g/Sfrp2/Kitl/Shh/Bnc2/Edn1/Wnt2/Zeb2 | 15 |
| GO:0048738 | BP | GO:0048738 | cardiac muscle tissue development | 14/478 | 271/28943 | 0.000185345 | 0.007873224 | 0.006400945 | Shox2/Pitx2/Pou4f1/Angpt1/Camk2d/Irx3/Agt/AW551984/Asb2/Nox4/Mylk3/Epor/Edn1/Wnt2 | 14 |
| GO:0006816 | BP | GO:0006816 | calcium ion transport | 19/478 | 449/28943 | 0.000198389 | 0.008280148 | 0.006731774 | Atp2a1/Calca/Grin3a/Cxcl10/Npsr1/Chrna4/Camk2d/Agt/F2r/Grin2d/Casr/Plpp4/Ramp3/Cckar/Cxcl9/Edn1/Srl/Ccl5/Ryr1 | 19 |
| GO:0046928 | BP | GO:0046928 | regulation of neurotransmitter secretion | 9/478 | 122/28943 | 0.000199072 | 0.008280148 | 0.006731774 | Grin3a/Chrna3/Glra3/Chrna4/Mctp2/Chrnb3/Baiap3/Grm4/Kcnh1 | 9 |
| GO:0070997 | BP | GO:0070997 | neuron death | 19/478 | 450/28943 | 0.000204041 | 0.008365089 | 0.006800832 | Pcdhgc4/Fzd9/Gata3/Pou4f1/Tmtc4/Angpt1/Tfap2d/Agt/F2r/Adarb1/Tfap2b/Cit/Fzd1/Ache/Shh/Foxb1/Epha7/Epor/Ccl5 | 19 |
| GO:0055007 | BP | GO:0055007 | cardiac muscle cell differentiation | 10/478 | 150/28943 | 0.000205304 | 0.008365089 | 0.006800832 | Shox2/Pitx2/Camk2d/Irx3/Agt/AW551984/Asb2/Nox4/Mylk3/Edn1 | 10 |
| GO:1904062 | BP | GO:1904062 | regulation of cation transmembrane transport | 18/478 | 414/28943 | 0.000208924 | 0.008426585 | 0.006850828 | Hcn4/Calca/Cxcl10/Oprm1/Npsr1/Chrna4/Camk2d/Gal/Agt/F2r/Grin2d/Cnksr3/Kcnc2/Hcn3/Ramp3/Cxcl9/Edn1/Lrrc26 | 18 |
| GO:0021924 | BP | GO:0021924 | cell proliferation in external granule layer | 4/478 | 19/28943 | 0.000233853 | 0.009245299 | 0.007516443 | Zfp423/Gbx2/Rora/Shh | 4 |
| GO:0021930 | BP | GO:0021930 | cerebellar granule cell precursor proliferation | 4/478 | 19/28943 | 0.000233853 | 0.009245299 | 0.007516443 | Zfp423/Gbx2/Rora/Shh | 4 |
| GO:0048864 | BP | GO:0048864 | stem cell development | 8/478 | 99/28943 | 0.000240427 | 0.009411994 | 0.007651967 | Ret/Pitx2/Gbx2/Sema4g/Kitl/Shh/Edn1/Zeb2 | 8 |
| GO:0072001 | BP | GO:0072001 | renal system development | 16/478 | 348/28943 | 0.000250136 | 0.009697021 | 0.007883695 | Irx1/Ret/Gata3/Angpt1/Irx3/Irx2/Agt/Wnt9b/Tfap2b/Itga3/Stat1/Lgr5/Shh/Cyp4a10/Epha7/Itga8 | 16 |
| GO:0072073 | BP | GO:0072073 | kidney epithelium development | 10/478 | 155/28943 | 0.000267638 | 0.010275758 | 0.008354209 | Irx1/Ret/Gata3/Irx3/Irx2/Agt/Wnt9b/Tfap2b/Shh/Epha7 | 10 |
| GO:0035148 | BP | GO:0035148 | tube formation | 11/478 | 185/28943 | 0.00027254 | 0.010364291 | 0.008426186 | Irx1/Ret/Gata3/Irx3/Irx2/Wnt9b/Sfrp2/Fzd1/Shh/Stil/Zeb2 | 11 |
| GO:0044264 | BP | GO:0044264 | cellular polysaccharide metabolic process | 8/478 | 101/28943 | 0.000275806 | 0.010383262 | 0.00844161 | Tcf7l2/Has1/Pygm/Grb10/Esrrb/Ppp1r1a/B3gnt8/Has3 | 8 |
| GO:0006936 | BP | GO:0006936 | muscle contraction | 15/478 | 317/28943 | 0.000285584 | 0.010383262 | 0.00844161 | Atp2a1/Hcn4/Calca/Tacr3/Chrna3/Tnnt1/Camk2d/Agt/Kcnj5/F2r/Actn3/Htr7/Edn1/Tmod1/Ryr1 | 15 |
| GO:0051480 | BP | GO:0051480 | regulation of cytosolic calcium ion concentration | 6/478 | 55/28943 | 0.0002874 | 0.010383262 | 0.00844161 | Adcy8/Calca/Fzd9/Calb2/Kcnh1/Ryr1 | 6 |
| GO:0021534 | BP | GO:0021534 | cell proliferation in hindbrain | 4/478 | 20/28943 | 0.000288517 | 0.010383262 | 0.00844161 | Zfp423/Gbx2/Rora/Shh | 4 |
| GO:0048557 | BP | GO:0048557 | embryonic digestive tract morphogenesis | 4/478 | 20/28943 | 0.000288517 | 0.010383262 | 0.00844161 | Shox2/Pitx2/Tcf7l2/Shh | 4 |
| GO:0003007 | BP | GO:0003007 | heart morphogenesis | 14/478 | 283/28943 | 0.000288641 | 0.010383262 | 0.00844161 | Shox2/Pitx2/Gata3/Pou4f1/Angpt1/Sfrp2/Fzd1/Asb2/Shh/Stil/Epor/Edn1/Wnt2/Ryr1 | 14 |
| GO:0014033 | BP | GO:0014033 | neural crest cell differentiation | 8/478 | 102/28943 | 0.000295028 | 0.010505509 | 0.008540997 | Ret/Pitx2/Gbx2/Sema4g/Kitl/Shh/Edn1/Zeb2 | 8 |
| GO:0001964 | BP | GO:0001964 | startle response | 5/478 | 36/28943 | 0.000297301 | 0.010505509 | 0.008540997 | Grin3a/Slitrk6/Grin2d/Fabp7/Kcnh1 | 5 |
| GO:0016032 | BP | GO:0016032 | viral process | 16/478 | 355/28943 | 0.000312012 | 0.010928619 | 0.008884986 | Eif2ak2/Rsad2/Lef1/Trim30d/Adarb1/Stat1/Trim21/Oasl1/Parp10/Sp100/Isg15/Oasl2/Ciita/Ifih1/Epor/Ccl5 | 16 |
| GO:0007631 | BP | GO:0007631 | feeding behavior | 9/478 | 130/28943 | 0.000320115 | 0.011019142 | 0.008958581 | Calca/Tacr3/Pou4f1/Oprm1/Npsr1/Gal/Agt/Cckar/Mrap2 | 9 |
| GO:0019079 | BP | GO:0019079 | viral genome replication | 9/478 | 130/28943 | 0.000320115 | 0.011019142 | 0.008958581 | Eif2ak2/Rsad2/Adarb1/Oasl1/Parp10/Isg15/Oasl2/Ifih1/Ccl5 | 9 |
| GO:0048880 | BP | GO:0048880 | sensory system development | 18/478 | 431/28943 | 0.000339032 | 0.011570543 | 0.009406871 | Mab21l2/Pitx2/Rcn1/Mab21l1/Gata3/Slc17a6/Pou4f1/Slitrk6/Tmem132e/Dzank1/Pbx3/Crb1/Ache/Shh/Irx6/Inhba/Tmod1/Zeb2 | 18 |
| GO:0060333 | BP | GO:0060333 | interferon-gamma-mediated signaling pathway | 4/478 | 21/28943 | 0.000351773 | 0.01186983 | 0.009650192 | Socs1/Parp14/Stat1/Parp9 | 4 |
| GO:1904064 | BP | GO:1904064 | positive regulation of cation transmembrane transport | 11/478 | 191/28943 | 0.000358046 | 0.01186983 | 0.009650192 | Cxcl10/Npsr1/Gal/Agt/F2r/Cnksr3/Kcnc2/Ramp3/Cxcl9/Edn1/Lrrc26 | 11 |
| GO:0072080 | BP | GO:0072080 | nephron tubule development | 8/478 | 105/28943 | 0.000359357 | 0.01186983 | 0.009650192 | Irx1/Gata3/Irx3/Irx2/Agt/Wnt9b/Tfap2b/Shh | 8 |
| GO:0048608 | BP | GO:0048608 | reproductive structure development | 15/478 | 324/28943 | 0.000359692 | 0.01186983 | 0.009650192 | Foxa1/Tcf7l2/Gata3/Angpt1/Nhlh2/Agt/Nefh/Wnt9b/Ror2/Sfrp2/Kitl/Tex15/Shh/Inhba/Fst | 15 |
| GO:0051155 | BP | GO:0051155 | positive regulation of striated muscle cell differentiation | 6/478 | 58/28943 | 0.000384905 | 0.012506738 | 0.010167999 | Shox2/Smyd1/Actn3/Shh/Mylk3/Edn1 | 6 |
| GO:0072210 | BP | GO:0072210 | metanephric nephron development | 5/478 | 38/28943 | 0.000385256 | 0.012506738 | 0.010167999 | Irx1/Ret/Irx2/Wnt9b/Tfap2b | 5 |
| GO:0090257 | BP | GO:0090257 | regulation of muscle system process | 13/478 | 258/28943 | 0.000395472 | 0.012734825 | 0.010353434 | Atp2a1/Hcn4/Calca/Tacr3/Chrna3/Tnnt1/Camk2d/Agt/F2r/Actn3/Edn1/Srl/Ryr1 | 13 |
| GO:0061458 | BP | GO:0061458 | reproductive system development | 15/478 | 328/28943 | 0.000409034 | 0.013066196 | 0.01062284 | Foxa1/Tcf7l2/Gata3/Angpt1/Nhlh2/Agt/Nefh/Wnt9b/Ror2/Sfrp2/Kitl/Tex15/Shh/Inhba/Fst | 15 |
| GO:0051402 | BP | GO:0051402 | neuron apoptotic process | 15/478 | 329/28943 | 0.00042224 | 0.013333559 | 0.010840206 | Pcdhgc4/Fzd9/Gata3/Pou4f1/Tmtc4/Angpt1/Tfap2d/Agt/F2r/Adarb1/Tfap2b/Cit/Foxb1/Epha7/Epor | 15 |
| GO:0035561 | BP | GO:0035561 | regulation of chromatin binding | 4/478 | 22/28943 | 0.000424363 | 0.013333559 | 0.010840206 | Dtx3l/Zfp618/Tunar/Parp9 | 4 |
| GO:0070374 | BP | GO:0070374 | positive regulation of ERK1 and ERK2 cascade | 12/478 | 227/28943 | 0.000427422 | 0.013333559 | 0.010840206 | Oprm1/Npsr1/Angpt1/Camk2d/F2r/Akap12/Casr/Necab2/Ramp3/Nox4/Epor/Ccl5 | 12 |
| GO:0009306 | BP | GO:0009306 | protein secretion | 17/478 | 404/28943 | 0.000451193 | 0.013966006 | 0.011354387 | Adcy8/Cbln4/Cbln1/Tcf7l2/Oprm1/Gpld1/Rsad2/Syt9/Rab3c/F2r/Baiap3/Tfap2b/Casr/Cckar/Nnat/Mafa/Ccl5 | 17 |
| GO:0061138 | BP | GO:0061138 | morphogenesis of a branching epithelium | 12/478 | 229/28943 | 0.000462307 | 0.014142117 | 0.011497565 | Foxa1/Pitx2/Angpt1/Gbx2/Agt/Lef1/Wnt9b/Casr/Sfrp2/Shh/Edn1/Wnt2 | 12 |
| GO:0035592 | BP | GO:0035592 | establishment of protein localization to extracellular region | 17/478 | 405/28943 | 0.000463966 | 0.014142117 | 0.011497565 | Adcy8/Cbln4/Cbln1/Tcf7l2/Oprm1/Gpld1/Rsad2/Syt9/Rab3c/F2r/Baiap3/Tfap2b/Casr/Cckar/Nnat/Mafa/Ccl5 | 17 |
| GO:0099504 | BP | GO:0099504 | synaptic vesicle cycle | 12/478 | 230/28943 | 0.000480631 | 0.014299635 | 0.011625627 | Grin3a/Chrna3/Slc17a6/Glra3/Chrna4/Syt9/Chrnb3/Unc13c/Grm4/Vamp1/Dnm3/Kcnh1 | 12 |
| GO:0006937 | BP | GO:0006937 | regulation of muscle contraction | 10/478 | 167/28943 | 0.000484158 | 0.014299635 | 0.011625627 | Atp2a1/Hcn4/Calca/Tacr3/Chrna3/Tnnt1/F2r/Actn3/Edn1/Ryr1 | 10 |
| GO:2000300 | BP | GO:2000300 | regulation of synaptic vesicle exocytosis | 7/478 | 84/28943 | 0.000485967 | 0.014299635 | 0.011625627 | Grin3a/Chrna3/Glra3/Chrna4/Chrnb3/Grm4/Kcnh1 | 7 |
| GO:0050931 | BP | GO:0050931 | pigment cell differentiation | 5/478 | 40/28943 | 0.000491552 | 0.014299635 | 0.011625627 | Mreg/Tyrp1/Kitl/Rab38/Zeb2 | 5 |
| GO:0010595 | BP | GO:0010595 | positive regulation of endothelial cell migration | 8/478 | 110/28943 | 0.000491643 | 0.014299635 | 0.011625627 | Gata3/Amotl1/Gpld1/Angpt1/Sparc/Agt/Hspb1/Shh | 8 |
| GO:0072070 | BP | GO:0072070 | loop of Henle development | 3/478 | 10/28943 | 0.000492703 | 0.014299635 | 0.011625627 | Irx1/Irx3/Irx2 | 3 |
| GO:0030099 | BP | GO:0030099 | myeloid cell differentiation | 18/478 | 445/28943 | 0.000494202 | 0.014299635 | 0.011625627 | Calca/Gata3/Pou4f1/Batf2/Lef1/Inpp4b/Tal1/Ror2/Stat1/Kitl/Ank1/Fam20c/Isg15/Inhba/Ccl5/Alas2/Hba-a2/Hba-a1 | 18 |
| GO:0071695 | BP | GO:0071695 | anatomical structure maturation | 14/478 | 299/28943 | 0.000500382 | 0.014368306 | 0.011681458 | Foxa1/Ret/Calca/Gata3/Mreg/Gal/Actn3/Tal1/Fam20c/Epha8/Edn1/Runx2/Ryr1/Dazl | 14 |
| GO:0051098 | BP | GO:0051098 | regulation of binding | 17/478 | 408/28943 | 0.000504173 | 0.014368306 | 0.011681458 | Pitx2/Grem2/Tcf7l2/Gata3/Pou4f1/Dtx3l/Angpt1/Pcbd1/Lef1/Cyp2d9/Zfp618/Ifit2/Trim21/Sp100/Tunar/Parp9/Nek2 | 17 |
| GO:0048015 | BP | GO:0048015 | phosphatidylinositol-mediated signaling | 10/478 | 168/28943 | 0.000507371 | 0.014368306 | 0.011681458 | Plch1/Gata3/Angpt1/Agt/F2r/Ror2/Btn2a2/Edn1/Ccl5/Kcnh1 | 10 |
| GO:0051588 | BP | GO:0051588 | regulation of neurotransmitter transport | 9/478 | 139/28943 | 0.000523204 | 0.014712361 | 0.011961175 | Grin3a/Chrna3/Glra3/Chrna4/Mctp2/Chrnb3/Baiap3/Grm4/Kcnh1 | 9 |
| GO:0007626 | BP | GO:0007626 | locomotory behavior | 13/478 | 266/28943 | 0.000527524 | 0.014730086 | 0.011975585 | Adcy8/Chrna3/Slitrk6/Oprm1/Chrna4/Klhl1/Zfhx3/Grin2d/Tal1/Pbx3/Fign/Tmod1/Ppp1r1b | 13 |
| GO:1901215 | BP | GO:1901215 | negative regulation of neuron death | 13/478 | 267/28943 | 0.00054639 | 0.014821477 | 0.012049886 | Pcdhgc4/Fzd9/Pou4f1/Angpt1/Tfap2d/Agt/F2r/Tfap2b/Fzd1/Shh/Foxb1/Epor/Ccl5 | 13 |
| GO:0071692 | BP | GO:0071692 | protein localization to extracellular region | 17/478 | 411/28943 | 0.000547345 | 0.014821477 | 0.012049886 | Adcy8/Cbln4/Cbln1/Tcf7l2/Oprm1/Gpld1/Rsad2/Syt9/Rab3c/F2r/Baiap3/Tfap2b/Casr/Cckar/Nnat/Mafa/Ccl5 | 17 |
| GO:0030177 | BP | GO:0030177 | positive regulation of Wnt signaling pathway | 9/478 | 140/28943 | 0.000551145 | 0.014821477 | 0.012049886 | Fzd9/Dkk2/Lef1/Ror2/Sfrp2/Lgr5/Shh/Wnt3/Zeb2 | 9 |
| GO:0030278 | BP | GO:0030278 | regulation of ossification | 9/478 | 140/28943 | 0.000551145 | 0.014821477 | 0.012049886 | Calca/Fzd9/Rsad2/Actn3/Scube2/Nell1/Fam20c/Isg15/Runx2 | 9 |
| GO:0044262 | BP | GO:0044262 | cellular carbohydrate metabolic process | 14/478 | 302/28943 | 0.000552116 | 0.014821477 | 0.012049886 | Tcf7l2/Has1/Gpld1/Rora/Mogat1/Inpp4b/Actn3/Pygm/Grb10/Esrrb/Ppp1r1a/B3gnt8/Igfbp4/Has3 | 14 |
| GO:0045744 | BP | GO:0045744 | negative regulation of G protein-coupled receptor signaling pathway | 6/478 | 62/28943 | 0.000553068 | 0.014821477 | 0.012049886 | Calca/Oprm1/Necab2/Mrap2/Ccl5/Arr3 | 6 |
| GO:0072078 | BP | GO:0072078 | nephron tubule morphogenesis | 7/478 | 86/28943 | 0.00056048 | 0.014919975 | 0.012129965 | Irx1/Gata3/Irx3/Irx2/Agt/Wnt9b/Shh | 7 |
| GO:0046879 | BP | GO:0046879 | hormone secretion | 16/478 | 375/28943 | 0.000566737 | 0.014986618 | 0.012184146 | Adcy8/Tcf7l2/Gata3/Gpld1/Gal/Syt9/Agt/Baiap3/Tfap2b/Casr/Cckar/Nnat/Inhba/Edn1/Mafa/Ccl5 | 16 |
| GO:0048017 | BP | GO:0048017 | inositol lipid-mediated signaling | 10/478 | 171/28943 | 0.00058261 | 0.015305 | 0.012442991 | Plch1/Gata3/Angpt1/Agt/F2r/Ror2/Btn2a2/Edn1/Ccl5/Kcnh1 | 10 |
| GO:0005976 | BP | GO:0005976 | polysaccharide metabolic process | 8/478 | 113/28943 | 0.000588315 | 0.015353855 | 0.01248271 | Tcf7l2/Has1/Pygm/Grb10/Esrrb/Ppp1r1a/B3gnt8/Has3 | 8 |
| GO:0030326 | BP | GO:0030326 | embryonic limb morphogenesis | 9/478 | 143/28943 | 0.00064239 | 0.016478788 | 0.013397283 | Shox2/Pitx2/Lef1/Ror2/Sfrp2/Shh/Wnt3/Sp8/Runx2 | 9 |
| GO:0035113 | BP | GO:0035113 | embryonic appendage morphogenesis | 9/478 | 143/28943 | 0.00064239 | 0.016478788 | 0.013397283 | Shox2/Pitx2/Lef1/Ror2/Sfrp2/Shh/Wnt3/Sp8/Runx2 | 9 |
| GO:0072088 | BP | GO:0072088 | nephron epithelium morphogenesis | 7/478 | 88/28943 | 0.000643799 | 0.016478788 | 0.013397283 | Irx1/Gata3/Irx3/Irx2/Agt/Wnt9b/Shh | 7 |
| GO:0071372 | BP | GO:0071372 | cellular response to follicle-stimulating hormone stimulus | 3/478 | 11/28943 | 0.000669175 | 0.016855788 | 0.013703785 | Epha8/Inhba/Edn1 | 3 |
| GO:0046883 | BP | GO:0046883 | regulation of hormone secretion | 14/478 | 308/28943 | 0.000669321 | 0.016855788 | 0.013703785 | Adcy8/Tcf7l2/Gpld1/Gal/Syt9/Agt/Baiap3/Tfap2b/Casr/Cckar/Nnat/Inhba/Edn1/Ccl5 | 14 |
| GO:0050808 | BP | GO:0050808 | synapse organization | 19/478 | 496/28943 | 0.000673385 | 0.016855788 | 0.013703785 | Pcdhgc4/Cbln4/Cntnap4/Ntng1/Fzd9/Cbln1/L1cam/Slitrk6/Gap43/Sparc/F2r/Unc13c/Itga3/Lingo4/Lgi2/Fzd1/Ache/Dnm3/Epha7 | 19 |
| GO:0042471 | BP | GO:0042471 | ear morphogenesis | 9/478 | 144/28943 | 0.000675414 | 0.016855788 | 0.013703785 | Gata3/Slitrk6/Tmie/Gbx2/Lrig1/Ror2/Lhfpl5/Edn1/Itga8 | 9 |
| GO:0007218 | BP | GO:0007218 | neuropeptide signaling pathway | 7/478 | 89/28943 | 0.000688987 | 0.017075972 | 0.013882794 | Gpr165/Calca/Glra3/Oprm1/Npsr1/Gal/Pdyn | 7 |
| GO:0035107 | BP | GO:0035107 | appendage morphogenesis | 10/478 | 175/28943 | 0.000697066 | 0.017075972 | 0.013882794 | Shox2/Pitx2/Lef1/Ror2/Tfap2b/Sfrp2/Shh/Wnt3/Sp8/Runx2 | 10 |
| GO:0035108 | BP | GO:0035108 | limb morphogenesis | 10/478 | 175/28943 | 0.000697066 | 0.017075972 | 0.013882794 | Shox2/Pitx2/Lef1/Ror2/Tfap2b/Sfrp2/Shh/Wnt3/Sp8/Runx2 | 10 |
| GO:0009914 | BP | GO:0009914 | hormone transport | 16/478 | 383/28943 | 0.000709934 | 0.017285154 | 0.01405286 | Adcy8/Tcf7l2/Gata3/Gpld1/Gal/Syt9/Agt/Baiap3/Tfap2b/Casr/Cckar/Nnat/Inhba/Edn1/Mafa/Ccl5 | 16 |
| GO:0072028 | BP | GO:0072028 | nephron morphogenesis | 7/478 | 90/28943 | 0.00073665 | 0.017826925 | 0.01449332 | Irx1/Gata3/Irx3/Irx2/Agt/Wnt9b/Shh | 7 |
| GO:0060759 | BP | GO:0060759 | regulation of response to cytokine stimulus | 9/478 | 147/28943 | 0.000782893 | 0.018681323 | 0.015187948 | Angpt1/Socs1/Samhd1/Parp14/Isg15/Parp9/Usp29/Ifih1/Edn1 | 9 |
| GO:0090101 | BP | GO:0090101 | negative regulation of transmembrane receptor protein serine/threonine kinase signaling pathway | 9/478 | 147/28943 | 0.000782893 | 0.018681323 | 0.015187948 | Grem2/Tcf7l2/Vwc2l/Vwc2/Sfrp2/Fzd1/Tmprss6/Onecut2/Fst | 9 |
| GO:1902107 | BP | GO:1902107 | positive regulation of leukocyte differentiation | 11/478 | 210/28943 | 0.00079067 | 0.018681323 | 0.015187948 | Calca/Gata3/Pou4f1/Socs1/Lef1/Ror2/Kitl/Btn2a2/Shh/Ccl5/Il1rl2 | 11 |
| GO:1903708 | BP | GO:1903708 | positive regulation of hemopoiesis | 11/478 | 210/28943 | 0.00079067 | 0.018681323 | 0.015187948 | Calca/Gata3/Pou4f1/Socs1/Lef1/Ror2/Kitl/Btn2a2/Shh/Ccl5/Il1rl2 | 11 |
| GO:0022404 | BP | GO:0022404 | molting cycle process | 8/478 | 119/28943 | 0.000827686 | 0.019327191 | 0.015713039 | Mreg/Edaradd/Gal/Lrig1/Lgr5/Shh/Inhba/Fst | 8 |
| GO:0022405 | BP | GO:0022405 | hair cycle process | 8/478 | 119/28943 | 0.000827686 | 0.019327191 | 0.015713039 | Mreg/Edaradd/Gal/Lrig1/Lgr5/Shh/Inhba/Fst | 8 |
| GO:0002062 | BP | GO:0002062 | chondrocyte differentiation | 8/478 | 120/28943 | 0.000874258 | 0.019807463 | 0.016103501 | Shox2/Gpld1/Scube2/Prkg2/Ror2/Sfrp2/Col11a2/Runx2 | 8 |
| GO:0042472 | BP | GO:0042472 | inner ear morphogenesis | 8/478 | 120/28943 | 0.000874258 | 0.019807463 | 0.016103501 | Gata3/Slitrk6/Tmie/Gbx2/Lrig1/Ror2/Lhfpl5/Itga8 | 8 |
| GO:0072009 | BP | GO:0072009 | nephron epithelium development | 8/478 | 120/28943 | 0.000874258 | 0.019807463 | 0.016103501 | Irx1/Gata3/Irx3/Irx2/Agt/Wnt9b/Tfap2b/Shh | 8 |
| GO:0014874 | BP | GO:0014874 | response to stimulus involved in regulation of muscle adaptation | 3/478 | 12/28943 | 0.000881321 | 0.019807463 | 0.016103501 | Agt/Actn3/Srl | 3 |
| GO:0032354 | BP | GO:0032354 | response to follicle-stimulating hormone | 3/478 | 12/28943 | 0.000881321 | 0.019807463 | 0.016103501 | Epha8/Inhba/Edn1 | 3 |
| GO:0140289 | BP | GO:0140289 | protein mono-ADP-ribosylation | 3/478 | 12/28943 | 0.000881321 | 0.019807463 | 0.016103501 | Parp14/Parp10/Parp9 | 3 |
| GO:0007548 | BP | GO:0007548 | sex differentiation | 14/478 | 317/28943 | 0.000884281 | 0.019807463 | 0.016103501 | Tcf7l2/Gata3/Angpt1/Nhlh2/Agt/Nefh/Wnt9b/Ror2/Sfrp2/Kitl/Tex15/Shh/Inhba/Fst | 14 |
| GO:0034767 | BP | GO:0034767 | positive regulation of ion transmembrane transport | 11/478 | 213/28943 | 0.000887938 | 0.019807463 | 0.016103501 | Cxcl10/Npsr1/Gal/Agt/F2r/Cnksr3/Kcnc2/Ramp3/Cxcl9/Edn1/Lrrc26 | 11 |
| GO:0030218 | BP | GO:0030218 | erythrocyte differentiation | 9/478 | 150/28943 | 0.000903906 | 0.020051655 | 0.016302029 | Gata3/Tal1/Stat1/Ank1/Isg15/Inhba/Alas2/Hba-a2/Hba-a1 | 9 |
| GO:0030501 | BP | GO:0030501 | positive regulation of bone mineralization | 5/478 | 46/28943 | 0.000944239 | 0.02069431 | 0.01682451 | Fzd9/Actn3/Nell1/Fam20c/Isg15 | 5 |
| GO:0035136 | BP | GO:0035136 | forelimb morphogenesis | 5/478 | 46/28943 | 0.000944239 | 0.02069431 | 0.01682451 | Shox2/Tfap2b/Shh/Wnt3/Runx2 | 5 |
| GO:0003012 | BP | GO:0003012 | muscle system process | 17/478 | 432/28943 | 0.000948424 | 0.02069431 | 0.01682451 | Atp2a1/Hcn4/Calca/Tacr3/Chrna3/Tnnt1/Camk2d/Agt/Kcnj5/F2r/Actn3/Htr7/Asb2/Edn1/Tmod1/Srl/Ryr1 | 17 |
| GO:0042475 | BP | GO:0042475 | odontogenesis of dentin-containing tooth | 7/478 | 94/28943 | 0.000953991 | 0.020702638 | 0.01683128 | Tcf7l2/Edaradd/Lef1/Fam20c/Shh/Fst/Runx2 | 7 |
| GO:0007498 | BP | GO:0007498 | mesoderm development | 8/478 | 122/28943 | 0.000973703 | 0.021016203 | 0.017086209 | Pou4f1/Irx3/Lef1/Tal1/Sfrp2/Shh/Wnt3/Inhba | 8 |
| GO:0090596 | BP | GO:0090596 | sensory organ morphogenesis | 14/478 | 321/28943 | 0.000997023 | 0.021403822 | 0.017401344 | Pitx2/Gata3/Slitrk6/Tmie/Gbx2/Dzank1/Lrig1/Ror2/Crb1/Lhfpl5/Shh/Irx6/Edn1/Itga8 | 14 |
| GO:1903706 | BP | GO:1903706 | regulation of hemopoiesis | 17/478 | 435/28943 | 0.001022354 | 0.021830259 | 0.017748038 | Calca/Gata3/Pou4f1/Socs1/Lef1/Inpp4b/Tal1/Ror2/Hspb1/Stat1/Kitl/Btn2a2/Shh/Isg15/Inhba/Ccl5/Il1rl2 | 17 |
| GO:0007189 | BP | GO:0007189 | adenylate cyclase-activating G protein-coupled receptor signaling pathway | 9/478 | 153/28943 | 0.001039686 | 0.02202457 | 0.017906012 | Adcy8/Calca/Cxcl10/Oprm1/Rit2/Ramp3/Mrap2/Cxcl9/Adgrd1 | 9 |
| GO:0007215 | BP | GO:0007215 | glutamate receptor signaling pathway | 5/478 | 47/28943 | 0.001042485 | 0.02202457 | 0.017906012 | Grin3a/Grin2d/Necab2/Grm4/Gria2 | 5 |
| GO:0045648 | BP | GO:0045648 | positive regulation of erythrocyte differentiation | 4/478 | 28/28943 | 0.001098399 | 0.023037257 | 0.018729329 | Tal1/Stat1/Isg15/Inhba | 4 |
| GO:0051259 | BP | GO:0051259 | protein complex oligomerization | 12/478 | 253/28943 | 0.001105226 | 0.023037257 | 0.018729329 | Adcy8/Glra3/Kcnc2/Samhd1/Kcng4/Kctd9/Isg15/Kctd8/Krt10/Kctd1/Kctd16/Gria2 | 12 |
| GO:0035051 | BP | GO:0035051 | cardiocyte differentiation | 10/478 | 186/28943 | 0.001110585 | 0.023037257 | 0.018729329 | Shox2/Pitx2/Camk2d/Irx3/Agt/AW551984/Asb2/Nox4/Mylk3/Edn1 | 10 |
| GO:0021794 | BP | GO:0021794 | thalamus development | 3/478 | 13/28943 | 0.001131717 | 0.023037257 | 0.018729329 | Gbx2/Shh/Foxb1 | 3 |
| GO:0048934 | BP | GO:0048934 | peripheral nervous system neuron differentiation | 3/478 | 13/28943 | 0.001131717 | 0.023037257 | 0.018729329 | Pou4f1/Nefh/Onecut2 | 3 |
| GO:0048935 | BP | GO:0048935 | peripheral nervous system neuron development | 3/478 | 13/28943 | 0.001131717 | 0.023037257 | 0.018729329 | Pou4f1/Nefh/Onecut2 | 3 |
| GO:1904338 | BP | GO:1904338 | regulation of dopaminergic neuron differentiation | 3/478 | 13/28943 | 0.001131717 | 0.023037257 | 0.018729329 | Foxa1/Sfrp2/Shh | 3 |
| GO:0003015 | BP | GO:0003015 | heart process | 12/478 | 254/28943 | 0.001143133 | 0.023037257 | 0.018729329 | Shox2/Hcn4/Calca/Tacr3/Camk2d/Irx3/Agt/Kcnj5/Hcn3/Ramp3/Nox4/Edn1 | 12 |
| GO:0043583 | BP | GO:0043583 | ear development | 12/478 | 254/28943 | 0.001143133 | 0.023037257 | 0.018729329 | Gata3/Slitrk6/Tmie/Gbx2/Lrig1/Ror2/Lgr5/Lhfpl5/Shh/Esrrb/Edn1/Itga8 | 12 |
| GO:0048821 | BP | GO:0048821 | erythrocyte development | 5/478 | 48/28943 | 0.001148113 | 0.023037257 | 0.018729329 | Tal1/Ank1/Alas2/Hba-a2/Hba-a1 | 5 |
| GO:0031346 | BP | GO:0031346 | positive regulation of cell projection organization | 17/478 | 441/28943 | 0.001185007 | 0.02365639 | 0.019232685 | Dpysl3/Shox2/Ret/L1cam/Agt/Rit2/Trim67/Ror2/Itga3/Hspb1/Fzd1/Ache/Dnm3/Wnt3/Plk5/Epor/Zeb2 | 17 |
| GO:0048839 | BP | GO:0048839 | inner ear development | 11/478 | 221/28943 | 0.001196742 | 0.02365639 | 0.019232685 | Gata3/Slitrk6/Tmie/Gbx2/Lrig1/Ror2/Lgr5/Lhfpl5/Shh/Esrrb/Itga8 | 11 |
| GO:1903828 | BP | GO:1903828 | negative regulation of protein localization | 11/478 | 221/28943 | 0.001196742 | 0.02365639 | 0.019232685 | Trim40/Fzd9/Siah3/Oprm1/Angpt1/Rsad2/F2r/Derl3/Sp100/Mrap2/Dclk3 | 11 |
| GO:0030072 | BP | GO:0030072 | peptide hormone secretion | 13/478 | 291/28943 | 0.001203493 | 0.023672642 | 0.019245898 | Adcy8/Tcf7l2/Gpld1/Syt9/Agt/Baiap3/Tfap2b/Casr/Cckar/Nnat/Edn1/Mafa/Ccl5 | 13 |
| GO:0030318 | BP | GO:0030318 | melanocyte differentiation | 4/478 | 29/28943 | 0.001257665 | 0.024616945 | 0.020013618 | Mreg/Tyrp1/Kitl/Zeb2 | 4 |
| GO:0002763 | BP | GO:0002763 | positive regulation of myeloid leukocyte differentiation | 6/478 | 73/28943 | 0.00131541 | 0.025621627 | 0.020830426 | Calca/Pou4f1/Lef1/Ror2/Kitl/Ccl5 | 6 |
| GO:0007411 | BP | GO:0007411 | axon guidance | 12/478 | 259/28943 | 0.001349224 | 0.026152668 | 0.021262164 | L1cam/Gata3/Gbx2/Dpysl5/Gap43/Sema4g/Shh/Wnt3/Epha8/Epha7/Edn1/Robo3 | 12 |
| GO:0048806 | BP | GO:0048806 | genitalia development | 5/478 | 50/28943 | 0.001382855 | 0.026631193 | 0.021651205 | Tcf7l2/Wnt9b/Ror2/Tex15/Shh | 5 |
| GO:0097485 | BP | GO:0097485 | neuron projection guidance | 12/478 | 260/28943 | 0.001393919 | 0.026631193 | 0.021651205 | L1cam/Gata3/Gbx2/Dpysl5/Gap43/Sema4g/Shh/Wnt3/Epha8/Epha7/Edn1/Robo3 | 12 |
| GO:0099003 | BP | GO:0099003 | vesicle-mediated transport in synapse | 12/478 | 260/28943 | 0.001393919 | 0.026631193 | 0.021651205 | Grin3a/Chrna3/Slc17a6/Glra3/Chrna4/Syt9/Chrnb3/Unc13c/Grm4/Vamp1/Dnm3/Kcnh1 | 12 |
| GO:0010634 | BP | GO:0010634 | positive regulation of epithelial cell migration | 9/478 | 160/28943 | 0.00142134 | 0.026924931 | 0.021890015 | Gata3/Amotl1/Gpld1/Angpt1/Sparc/Agt/Itga3/Hspb1/Shh | 9 |
| GO:0072178 | BP | GO:0072178 | nephric duct morphogenesis | 3/478 | 14/28943 | 0.00142278 | 0.026924931 | 0.021890015 | Gata3/Wnt9b/Epha7 | 3 |
| GO:0045637 | BP | GO:0045637 | regulation of myeloid cell differentiation | 11/478 | 226/28943 | 0.001431125 | 0.026955101 | 0.021914543 | Calca/Pou4f1/Lef1/Inpp4b/Tal1/Ror2/Stat1/Kitl/Isg15/Inhba/Ccl5 | 11 |
| GO:0019058 | BP | GO:0019058 | viral life cycle | 12/478 | 261/28943 | 0.001439831 | 0.026982959 | 0.021937192 | Eif2ak2/Rsad2/Trim30d/Adarb1/Trim21/Oasl1/Parp10/Isg15/Oasl2/Ciita/Ifih1/Ccl5 | 12 |
| GO:0001822 | BP | GO:0001822 | kidney development | 14/478 | 334/28943 | 0.001450352 | 0.026982959 | 0.021937192 | Irx1/Ret/Gata3/Angpt1/Irx3/Irx2/Agt/Wnt9b/Tfap2b/Itga3/Shh/Cyp4a10/Epha7/Itga8 | 14 |
| GO:0032147 | BP | GO:0032147 | activation of protein kinase activity | 7/478 | 101/28943 | 0.001452877 | 0.026982959 | 0.021937192 | Adcy8/Calca/Chrna3/Angpt1/Agt/Socs1/Clspn | 7 |
| GO:0010976 | BP | GO:0010976 | positive regulation of neuron projection development | 11/478 | 227/28943 | 0.001482239 | 0.027400841 | 0.02227693 | Dpysl3/Ret/Agt/Rit2/Trim67/Ror2/Itga3/Hspb1/Fzd1/Plk5/Epor | 11 |
| GO:0043954 | BP | GO:0043954 | cellular component maintenance | 6/478 | 75/28943 | 0.0015136 | 0.027734655 | 0.022548322 | Cbln4/Cbln1/F2r/Itga3/Plekha7/Neat1 | 6 |
| GO:0007416 | BP | GO:0007416 | synapse assembly | 10/478 | 194/28943 | 0.0015226 | 0.027734655 | 0.022548322 | Cbln4/Cbln1/Slitrk6/Gap43/Lingo4/Lgi2/Fzd1/Ache/Dnm3/Epha7 | 10 |
| GO:0050905 | BP | GO:0050905 | neuromuscular process | 10/478 | 194/28943 | 0.0015226 | 0.027734655 | 0.022548322 | Atp2a1/Grin3a/Tnnt1/Pou4f1/Slitrk6/Grin2d/Fabp7/Actn3/Adarb1/Kcnh1 | 10 |
| GO:0002790 | BP | GO:0002790 | peptide secretion | 13/478 | 299/28943 | 0.001533139 | 0.027734655 | 0.022548322 | Adcy8/Tcf7l2/Gpld1/Syt9/Agt/Baiap3/Tfap2b/Casr/Cckar/Nnat/Edn1/Mafa/Ccl5 | 13 |
| GO:0060021 | BP | GO:0060021 | roof of mouth development | 7/478 | 102/28943 | 0.001538192 | 0.027734655 | 0.022548322 | Lef1/Wnt9b/Fzd1/Shh/Bnc2/Inhba/Col11a2 | 7 |
| GO:0007224 | BP | GO:0007224 | smoothened signaling pathway | 9/478 | 162/28943 | 0.001548918 | 0.027734655 | 0.022548322 | Foxa1/Shox2/Zfp423/Rora/Scube2/Ror2/Shh/Stil/Runx2 | 9 |
| GO:0034101 | BP | GO:0034101 | erythrocyte homeostasis | 9/478 | 162/28943 | 0.001548918 | 0.027734655 | 0.022548322 | Gata3/Tal1/Stat1/Ank1/Isg15/Inhba/Alas2/Hba-a2/Hba-a1 | 9 |
| GO:0043524 | BP | GO:0043524 | negative regulation of neuron apoptotic process | 10/478 | 195/28943 | 0.001581835 | 0.028197621 | 0.022924714 | Pcdhgc4/Fzd9/Pou4f1/Angpt1/Tfap2d/Agt/F2r/Tfap2b/Foxb1/Epor | 10 |
| GO:0055001 | BP | GO:0055001 | muscle cell development | 11/478 | 229/28943 | 0.001588958 | 0.028198714 | 0.022925603 | Shox2/Pitx2/Tnnt1/Camk2d/Agt/Actn3/Asb2/Mylk3/Edn1/Tmod1/Ryr1 | 11 |
| GO:0035094 | BP | GO:0035094 | response to nicotine | 4/478 | 31/28943 | 0.001623358 | 0.028681725 | 0.023318291 | Chrna3/Chrna4/Chrnb3/Ppp1r1b | 4 |
| GO:0007249 | BP | GO:0007249 | I-kappaB kinase/NF-kappaB signaling | 11/478 | 230/28943 | 0.001644628 | 0.02892951 | 0.02351974 | Edaradd/Angpt1/Rora/Trim30d/Hspb1/Stat1/Tnfsf10/Trim21/Edn1/Saa3/Clec4d | 11 |
| GO:0007229 | BP | GO:0007229 | integrin-mediated signaling pathway | 7/478 | 104/28943 | 0.001720495 | 0.029999722 | 0.024389825 | Vav3/Itga3/Isg15/Itga7/Itga5/Timp1/Itga8 | 7 |
| GO:0055013 | BP | GO:0055013 | cardiac muscle cell development | 7/478 | 104/28943 | 0.001720495 | 0.029999722 | 0.024389825 | Shox2/Pitx2/Camk2d/Agt/Asb2/Mylk3/Edn1 | 7 |
| GO:0060330 | BP | GO:0060330 | regulation of response to interferon-gamma | 3/478 | 15/28943 | 0.001756778 | 0.030236277 | 0.024582144 | Socs1/Parp14/Parp9 | 3 |
| GO:0060334 | BP | GO:0060334 | regulation of interferon-gamma-mediated signaling pathway | 3/478 | 15/28943 | 0.001756778 | 0.030236277 | 0.024582144 | Socs1/Parp14/Parp9 | 3 |
| GO:0072176 | BP | GO:0072176 | nephric duct development | 3/478 | 15/28943 | 0.001756778 | 0.030236277 | 0.024582144 | Gata3/Wnt9b/Epha7 | 3 |
| GO:0014065 | BP | GO:0014065 | phosphatidylinositol 3-kinase signaling | 8/478 | 134/28943 | 0.001776415 | 0.030443028 | 0.024750234 | Gata3/Angpt1/Agt/F2r/Ror2/Btn2a2/Edn1/Ccl5 | 8 |
| GO:0048641 | BP | GO:0048641 | regulation of skeletal muscle tissue development | 4/478 | 32/28943 | 0.001831315 | 0.031249745 | 0.025406096 | Shox2/Tcf7l2/Actn3/Shh | 4 |
| GO:0019221 | BP | GO:0019221 | cytokine-mediated signaling pathway | 16/478 | 421/28943 | 0.001885339 | 0.032034711 | 0.026044275 | Cxcl10/Grem2/Angpt1/Socs1/Samhd1/Parp14/Stat1/Oasl1/Isg15/Parp9/Cxcl9/Oasl2/Usp29/Epor/Edn1/Ccl5 | 16 |
| GO:0030073 | BP | GO:0030073 | insulin secretion | 11/478 | 235/28943 | 0.001947407 | 0.03281417 | 0.026677976 | Adcy8/Tcf7l2/Gpld1/Syt9/Baiap3/Tfap2b/Casr/Cckar/Nnat/Mafa/Ccl5 | 11 |
| GO:0048066 | BP | GO:0048066 | developmental pigmentation | 5/478 | 54/28943 | 0.001955866 | 0.03281417 | 0.026677976 | Mreg/Tyrp1/Kitl/Rab38/Zeb2 | 5 |
| GO:0048483 | BP | GO:0048483 | autonomic nervous system development | 5/478 | 54/28943 | 0.001955866 | 0.03281417 | 0.026677976 | Ret/Gata3/Gbx2/Adarb1/Tfap2b | 5 |
| GO:0045669 | BP | GO:0045669 | positive regulation of osteoblast differentiation | 6/478 | 79/28943 | 0.001977331 | 0.032974701 | 0.026808488 | Scube2/Sfrp2/Nell1/Gdpd2/Fam20c/Runx2 | 6 |
| GO:0045765 | BP | GO:0045765 | regulation of angiogenesis | 13/478 | 308/28943 | 0.001990174 | 0.032974701 | 0.026808488 | Cxcl10/Sparc/Minar1/Vash2/Agt/Sfrp2/Hspb1/Stat1/Ccn6/Shh/Sp100/Ccl5/Itga5 | 13 |
| GO:0001654 | BP | GO:0001654 | eye development | 16/478 | 424/28943 | 0.002024208 | 0.032974701 | 0.026808488 | Mab21l2/Pitx2/Rcn1/Mab21l1/Gata3/Slc17a6/Slitrk6/Dzank1/Pbx3/Crb1/Ache/Shh/Irx6/Inhba/Tmod1/Zeb2 | 16 |
| GO:0009953 | BP | GO:0009953 | dorsal/ventral pattern formation | 7/478 | 107/28943 | 0.002024914 | 0.032974701 | 0.026808488 | Foxa1/Grem2/Shh/Wnt3/Bmp1/Edn1/Sp8 | 7 |
| GO:0060993 | BP | GO:0060993 | kidney morphogenesis | 7/478 | 107/28943 | 0.002024914 | 0.032974701 | 0.026808488 | Irx1/Gata3/Irx3/Irx2/Agt/Wnt9b/Shh | 7 |
| GO:0001959 | BP | GO:0001959 | regulation of cytokine-mediated signaling pathway | 8/478 | 137/28943 | 0.002041889 | 0.032974701 | 0.026808488 | Angpt1/Socs1/Samhd1/Parp14/Isg15/Parp9/Usp29/Edn1 | 8 |
| GO:0042303 | BP | GO:0042303 | molting cycle | 8/478 | 137/28943 | 0.002041889 | 0.032974701 | 0.026808488 | Mreg/Edaradd/Gal/Lrig1/Lgr5/Shh/Inhba/Fst | 8 |
| GO:0042633 | BP | GO:0042633 | hair cycle | 8/478 | 137/28943 | 0.002041889 | 0.032974701 | 0.026808488 | Mreg/Edaradd/Gal/Lrig1/Lgr5/Shh/Inhba/Fst | 8 |
| GO:0002230 | BP | GO:0002230 | positive regulation of defense response to virus by host | 4/478 | 33/28943 | 0.002057022 | 0.032974701 | 0.026808488 | Dtx3l/Stat1/Parp9/Ccl5 | 4 |
| GO:0040036 | BP | GO:0040036 | regulation of fibroblast growth factor receptor signaling pathway | 4/478 | 33/28943 | 0.002057022 | 0.032974701 | 0.026808488 | Tcf7l2/Gata3/Fam20c/Runx2 | 4 |
| GO:0048566 | BP | GO:0048566 | embryonic digestive tract development | 4/478 | 33/28943 | 0.002057022 | 0.032974701 | 0.026808488 | Shox2/Pitx2/Tcf7l2/Shh | 4 |
| GO:0046887 | BP | GO:0046887 | positive regulation of hormone secretion | 9/478 | 169/28943 | 0.002069602 | 0.032974701 | 0.026808488 | Adcy8/Tcf7l2/Gpld1/Gal/Baiap3/Casr/Cckar/Nnat/Edn1 | 9 |
| GO:0002683 | BP | GO:0002683 | negative regulation of immune system process | 17/478 | 465/28943 | 0.00207279 | 0.032974701 | 0.026808488 | Calca/Angpt1/Gal/Tafa3/Socs1/Inpp4b/Samhd1/Tapbpl/Parp14/Hspb1/Kitl/Btn2a2/Trim21/Shh/Isg15/Cd274/H2-Ob | 17 |
| GO:0051149 | BP | GO:0051149 | positive regulation of muscle cell differentiation | 6/478 | 80/28943 | 0.002108416 | 0.033184365 | 0.026978946 | Shox2/Smyd1/Actn3/Shh/Mylk3/Edn1 | 6 |
| GO:0045933 | BP | GO:0045933 | positive regulation of muscle contraction | 5/478 | 55/28943 | 0.002122712 | 0.033184365 | 0.026978946 | Atp2a1/Tacr3/F2r/Actn3/Edn1 | 5 |
| GO:0048546 | BP | GO:0048546 | digestive tract morphogenesis | 5/478 | 55/28943 | 0.002122712 | 0.033184365 | 0.026978946 | Shox2/Pitx2/Tcf7l2/Sfrp2/Shh | 5 |
| GO:0035112 | BP | GO:0035112 | genitalia morphogenesis | 3/478 | 16/28943 | 0.002135833 | 0.033184365 | 0.026978946 | Tcf7l2/Ror2/Shh | 3 |
| GO:0060979 | BP | GO:0060979 | vasculogenesis involved in coronary vascular morphogenesis | 3/478 | 16/28943 | 0.002135833 | 0.033184365 | 0.026978946 | Angpt1/Shh/Epor | 3 |
| GO:0071371 | BP | GO:0071371 | cellular response to gonadotropin stimulus | 3/478 | 16/28943 | 0.002135833 | 0.033184365 | 0.026978946 | Epha8/Inhba/Edn1 | 3 |
| GO:0150063 | BP | GO:0150063 | visual system development | 16/478 | 427/28943 | 0.002171525 | 0.033538222 | 0.027266632 | Mab21l2/Pitx2/Rcn1/Mab21l1/Gata3/Slc17a6/Slitrk6/Dzank1/Pbx3/Crb1/Ache/Shh/Irx6/Inhba/Tmod1/Zeb2 | 16 |
| GO:1902105 | BP | GO:1902105 | regulation of leukocyte differentiation | 14/478 | 349/28943 | 0.002175407 | 0.033538222 | 0.027266632 | Calca/Gata3/Pou4f1/Socs1/Lef1/Inpp4b/Tal1/Ror2/Hspb1/Kitl/Btn2a2/Shh/Ccl5/Il1rl2 | 14 |
| GO:1901342 | BP | GO:1901342 | regulation of vasculature development | 13/478 | 312/28943 | 0.002226592 | 0.034195315 | 0.027800849 | Cxcl10/Sparc/Minar1/Vash2/Agt/Sfrp2/Hspb1/Stat1/Ccn6/Shh/Sp100/Ccl5/Itga5 | 13 |
| GO:0048736 | BP | GO:0048736 | appendage development | 10/478 | 205/28943 | 0.002283413 | 0.034674746 | 0.028190628 | Shox2/Pitx2/Lef1/Ror2/Tfap2b/Sfrp2/Shh/Wnt3/Sp8/Runx2 | 10 |
| GO:0060173 | BP | GO:0060173 | limb development | 10/478 | 205/28943 | 0.002283413 | 0.034674746 | 0.028190628 | Shox2/Pitx2/Lef1/Ror2/Tfap2b/Sfrp2/Shh/Wnt3/Sp8/Runx2 | 10 |
| GO:0070169 | BP | GO:0070169 | positive regulation of biomineral tissue development | 5/478 | 56/28943 | 0.002299699 | 0.034674746 | 0.028190628 | Fzd9/Actn3/Nell1/Fam20c/Isg15 | 5 |
| GO:1901861 | BP | GO:1901861 | regulation of muscle tissue development | 5/478 | 56/28943 | 0.002299699 | 0.034674746 | 0.028190628 | Shox2/Tcf7l2/Lef1/Actn3/Shh | 5 |
| GO:0048799 | BP | GO:0048799 | animal organ maturation | 4/478 | 34/28943 | 0.002301229 | 0.034674746 | 0.028190628 | Ret/Gata3/Actn3/Ryr1 | 4 |
| GO:0031623 | BP | GO:0031623 | receptor internalization | 8/478 | 140/28943 | 0.00233763 | 0.035090819 | 0.028528896 | Calca/Angpt1/Necab2/Ramp3/Ache/Dnm3/Arr3/Gria2 | 8 |
| GO:0002262 | BP | GO:0002262 | myeloid cell homeostasis | 10/478 | 206/28943 | 0.002365481 | 0.035302521 | 0.028701009 | Gata3/Tal1/Stat1/Kitl/Ank1/Isg15/Inhba/Alas2/Hba-a2/Hba-a1 | 10 |
| GO:0055006 | BP | GO:0055006 | cardiac cell development | 7/478 | 110/28943 | 0.002369415 | 0.035302521 | 0.028701009 | Shox2/Pitx2/Camk2d/Agt/Asb2/Mylk3/Edn1 | 7 |
| GO:0043491 | BP | GO:0043491 | protein kinase B signaling | 10/478 | 207/28943 | 0.002449901 | 0.036366004 | 0.029565623 | Ret/Tcf7l2/Gata3/Angpt1/Xdh/Inpp4b/Ramp3/Btn2a2/Nox4/Ccl5 | 10 |
| GO:0110151 | BP | GO:0110151 | positive regulation of biomineralization | 5/478 | 57/28943 | 0.002487179 | 0.036782611 | 0.029904326 | Fzd9/Actn3/Nell1/Fam20c/Isg15 | 5 |
| GO:0034698 | BP | GO:0034698 | response to gonadotropin | 3/478 | 17/28943 | 0.002561925 | 0.037609438 | 0.030576537 | Epha8/Inhba/Edn1 | 3 |
| GO:1904862 | BP | GO:1904862 | inhibitory synapse assembly | 3/478 | 17/28943 | 0.002561925 | 0.037609438 | 0.030576537 | Cbln4/Cbln1/Lgi2 | 3 |
| GO:0045664 | BP | GO:0045664 | regulation of neuron differentiation | 11/478 | 244/28943 | 0.002606064 | 0.038117259 | 0.030989397 | Foxa1/Ret/Vwc2l/Irx3/Zfhx3/Vwc2/Sfrp2/Cit/Timp2/Shh/Ccl5 | 11 |
| GO:0051896 | BP | GO:0051896 | regulation of protein kinase B signaling | 9/478 | 175/28943 | 0.00261928 | 0.038170748 | 0.031032883 | Ret/Tcf7l2/Gata3/Angpt1/Xdh/Inpp4b/Ramp3/Btn2a2/Nox4 | 9 |
| GO:0002761 | BP | GO:0002761 | regulation of myeloid leukocyte differentiation | 8/478 | 143/28943 | 0.002665952 | 0.038569371 | 0.031356964 | Calca/Pou4f1/Lef1/Inpp4b/Tal1/Ror2/Kitl/Ccl5 | 8 |
| GO:0014902 | BP | GO:0014902 | myotube differentiation | 8/478 | 143/28943 | 0.002665952 | 0.038569371 | 0.031356964 | Shox2/Cxcl10/Smyd1/Adamts15/Actn3/Shh/Cxcl9/Ryr1 | 8 |
| GO:0033619 | BP | GO:0033619 | membrane protein proteolysis | 5/478 | 58/28943 | 0.002685507 | 0.038712013 | 0.031472932 | Ret/Gpld1/Timp2/Tmprss6/Timp1 | 5 |
| GO:0021953 | BP | GO:0021953 | central nervous system neuron differentiation | 10/478 | 210/28943 | 0.002717755 | 0.03894511 | 0.031662441 | Cbln1/Pou4f1/Gbx2/Nhlh2/Rora/Tal1/Adarb1/Shh/Inhba/Zeb2 | 10 |
| GO:0010594 | BP | GO:0010594 | regulation of endothelial cell migration | 9/478 | 176/28943 | 0.002721184 | 0.03894511 | 0.031662441 | Gata3/Amotl1/Gpld1/Angpt1/Sparc/Agt/Hspb1/Shh/Sp100 | 9 |
| GO:0002027 | BP | GO:0002027 | regulation of heart rate | 7/478 | 113/28943 | 0.002757388 | 0.039145914 | 0.031825694 | Shox2/Hcn4/Tacr3/Agt/Kcnj5/Hcn3/Edn1 | 7 |
| GO:0043473 | BP | GO:0043473 | pigmentation | 7/478 | 113/28943 | 0.002757388 | 0.039145914 | 0.031825694 | Mreg/Sparc/Vangl1/Tyrp1/Kitl/Rab38/Zeb2 | 7 |
| GO:0015833 | BP | GO:0015833 | peptide transport | 13/478 | 320/28943 | 0.002768877 | 0.039145914 | 0.031825694 | Adcy8/Tcf7l2/Gpld1/Syt9/Agt/Baiap3/Tfap2b/Casr/Cckar/Nnat/Edn1/Mafa/Ccl5 | 13 |
| GO:0002573 | BP | GO:0002573 | myeloid leukocyte differentiation | 11/478 | 246/28943 | 0.002774429 | 0.039145914 | 0.031825694 | Calca/Gata3/Pou4f1/Batf2/Lef1/Inpp4b/Tal1/Ror2/Kitl/Fam20c/Ccl5 | 11 |
| GO:0035115 | BP | GO:0035115 | embryonic forelimb morphogenesis | 4/478 | 36/28943 | 0.0028481 | 0.040020252 | 0.032536533 | Shox2/Shh/Wnt3/Runx2 | 4 |
| GO:1901214 | BP | GO:1901214 | regulation of neuron death | 15/478 | 399/28943 | 0.002856442 | 0.040020252 | 0.032536533 | Pcdhgc4/Fzd9/Gata3/Pou4f1/Angpt1/Tfap2d/Agt/F2r/Tfap2b/Fzd1/Shh/Foxb1/Epha7/Epor/Ccl5 | 15 |
| GO:0030198 | BP | GO:0030198 | extracellular matrix organization | 13/478 | 322/28943 | 0.002920091 | 0.040768969 | 0.033145241 | Adamts19/Ntng1/Adamts15/Has1/Adamts2/Agt/Sfrp2/Col9a2/Col11a2/Col6a5/Has3/Itga8/Meltf | 13 |
| GO:0030902 | BP | GO:0030902 | hindbrain development | 9/478 | 178/28943 | 0.002934393 | 0.040825888 | 0.033191516 | Cbln1/Pou4f1/Zfp423/Klhl1/Gbx2/Nhlh2/Rora/Lef1/Shh | 9 |
| GO:0043062 | BP | GO:0043062 | extracellular structure organization | 13/478 | 323/28943 | 0.002998188 | 0.041246053 | 0.033533111 | Adamts19/Ntng1/Adamts15/Has1/Adamts2/Agt/Sfrp2/Col9a2/Col11a2/Col6a5/Has3/Itga8/Meltf | 13 |
| GO:0043588 | BP | GO:0043588 | skin development | 13/478 | 323/28943 | 0.002998188 | 0.041246053 | 0.033533111 | Tcf7l2/Adamts2/Mreg/Edaradd/Gal/Tfap2b/Itga3/Lgr5/Shh/Inhba/Fst/Krt10/Ryr1 | 13 |
| GO:0031345 | BP | GO:0031345 | negative regulation of cell projection organization | 10/478 | 213/28943 | 0.003008538 | 0.041246053 | 0.033533111 | Dpysl3/Arhgap24/Minar1/Rit2/Sema4g/Itga3/Cit/Dnm3/Wnt3/Epha7 | 10 |
| GO:0000083 | BP | GO:0000083 | regulation of transcription involved in G1/S transition of mitotic cell cycle | 3/478 | 18/28943 | 0.003036899 | 0.041246053 | 0.033533111 | Cdk18/Esrrb/Cdk17 | 3 |
| GO:0033631 | BP | GO:0033631 | cell-cell adhesion mediated by integrin | 3/478 | 18/28943 | 0.003036899 | 0.041246053 | 0.033533111 | L1cam/Ccl5/Itga5 | 3 |
| GO:0035235 | BP | GO:0035235 | ionotropic glutamate receptor signaling pathway | 3/478 | 18/28943 | 0.003036899 | 0.041246053 | 0.033533111 | Grin3a/Grin2d/Gria2 | 3 |
| GO:1990806 | BP | GO:1990806 | ligand-gated ion channel signaling pathway | 3/478 | 18/28943 | 0.003036899 | 0.041246053 | 0.033533111 | Grin3a/Grin2d/Gria2 | 3 |
| GO:0045229 | BP | GO:0045229 | external encapsulating structure organization | 13/478 | 324/28943 | 0.003077981 | 0.041662297 | 0.033871518 | Adamts19/Ntng1/Adamts15/Has1/Adamts2/Agt/Sfrp2/Col9a2/Col11a2/Col6a5/Has3/Itga8/Meltf | 13 |
| GO:0045860 | BP | GO:0045860 | positive regulation of protein kinase activity | 14/478 | 363/28943 | 0.003100588 | 0.041826511 | 0.034005025 | Adcy8/Fzd10/Calca/Chrna3/Angpt1/Agt/Socs1/Ror2/Kitl/Stil/Nox4/Edn1/Zeb2/Clspn | 14 |
| GO:0051930 | BP | GO:0051930 | regulation of sensory perception of pain | 5/478 | 60/28943 | 0.003116125 | 0.041894571 | 0.034060357 | Tafa4/Oprm1/F2r/Grin2d/Edn1 | 5 |
| GO:0098657 | BP | GO:0098657 | import into cell | 11/478 | 250/28943 | 0.003137471 | 0.041956015 | 0.034110312 | Hcn4/Slc17a6/Slc7a3/Kcnj16/Slc6a11/Agt/Slc22a4/Kcnj5/Cubn/Kcnj12/Ramp3 | 11 |
| GO:0009954 | BP | GO:0009954 | proximal/distal pattern formation | 4/478 | 37/28943 | 0.003152218 | 0.041956015 | 0.034110312 | Irx1/Irx3/Irx2/Sp8 | 4 |
| GO:0060071 | BP | GO:0060071 | Wnt signaling pathway, planar cell polarity pathway | 4/478 | 37/28943 | 0.003152218 | 0.041956015 | 0.034110312 | Wnt9b/Ror2/Sfrp2/Fzd1 | 4 |
| GO:0001942 | BP | GO:0001942 | hair follicle development | 7/478 | 116/28943 | 0.003192313 | 0.042348531 | 0.034429427 | Mreg/Edaradd/Gal/Lgr5/Shh/Inhba/Fst | 7 |
| GO:0034329 | BP | GO:0034329 | cell junction assembly | 16/478 | 445/28943 | 0.003255589 | 0.043044919 | 0.034995592 | Cbln4/Cbln1/Slitrk6/Cdh20/Patj/Gap43/Irx3/Agt/Actn3/Lingo4/Lgi2/Fzd1/Ache/Dnm3/Epha7/Itga5 | 16 |
| GO:0051216 | BP | GO:0051216 | cartilage development | 10/478 | 216/28943 | 0.003323614 | 0.043560457 | 0.035414726 | Shox2/Gpld1/Scube2/Prkg2/Ror2/Sfrp2/Bmp1/Edn1/Col11a2/Runx2 | 10 |
| GO:0006939 | BP | GO:0006939 | smooth muscle contraction | 7/478 | 117/28943 | 0.003348337 | 0.043560457 | 0.035414726 | Calca/Tacr3/Chrna3/Agt/F2r/Htr7/Edn1 | 7 |
| GO:0035249 | BP | GO:0035249 | synaptic transmission, glutamatergic | 7/478 | 117/28943 | 0.003348337 | 0.043560457 | 0.035414726 | Slc17a6/Shc3/Grin2d/Unc13c/Ror2/Grm4/Gria2 | 7 |
| GO:0051931 | BP | GO:0051931 | regulation of sensory perception | 5/478 | 61/28943 | 0.003349126 | 0.043560457 | 0.035414726 | Tafa4/Oprm1/F2r/Grin2d/Edn1 | 5 |
| GO:0060760 | BP | GO:0060760 | positive regulation of response to cytokine stimulus | 5/478 | 61/28943 | 0.003349126 | 0.043560457 | 0.035414726 | Parp14/Parp9/Usp29/Ifih1/Edn1 | 5 |
| GO:0021675 | BP | GO:0021675 | nerve development | 6/478 | 88/28943 | 0.003406262 | 0.044089676 | 0.035844982 | Ret/Pou4f1/Slitrk6/Lrig1/Adarb1/Edn1 | 6 |
| GO:0010631 | BP | GO:0010631 | epithelial cell migration | 13/478 | 328/28943 | 0.003414651 | 0.044089676 | 0.035844982 | Calca/Gata3/Amotl1/Gpld1/Angpt1/Sparc/Agt/Itga3/Hspb1/Kitl/Shh/Sp100/Zeb2 | 13 |
| GO:0043523 | BP | GO:0043523 | regulation of neuron apoptotic process | 12/478 | 290/28943 | 0.00342294 | 0.044089676 | 0.035844982 | Pcdhgc4/Fzd9/Gata3/Pou4f1/Angpt1/Tfap2d/Agt/F2r/Tfap2b/Foxb1/Epha7/Epor | 12 |
| GO:0010737 | BP | GO:0010737 | protein kinase A signaling | 4/478 | 38/28943 | 0.003477742 | 0.044508414 | 0.036185417 | Gal/Akap12/Ramp3/Edn1 | 4 |
| GO:0095500 | BP | GO:0095500 | acetylcholine receptor signaling pathway | 4/478 | 38/28943 | 0.003477742 | 0.044508414 | 0.036185417 | Chrna3/Oprm1/Chrna4/Ache | 4 |
| GO:0035457 | BP | GO:0035457 | cellular response to interferon-alpha | 3/478 | 19/28943 | 0.003562471 | 0.04544711 | 0.036948578 | Ifit1/Ifit3/Ifit2 | 3 |
| GO:0090132 | BP | GO:0090132 | epithelium migration | 13/478 | 330/28943 | 0.003593874 | 0.045563227 | 0.037042981 | Calca/Gata3/Amotl1/Gpld1/Angpt1/Sparc/Agt/Itga3/Hspb1/Kitl/Shh/Sp100/Zeb2 | 13 |
| GO:0034340 | BP | GO:0034340 | response to type I interferon | 5/478 | 62/28943 | 0.003594394 | 0.045563227 | 0.037042981 | Samhd1/Stat1/Sp100/Isg15/Usp29 | 5 |
| GO:0045666 | BP | GO:0045666 | positive regulation of neuron differentiation | 7/478 | 119/28943 | 0.003677758 | 0.046472432 | 0.037782166 | Foxa1/Vwc2l/Irx3/Vwc2/Timp2/Shh/Ccl5 | 7 |
| GO:0003206 | BP | GO:0003206 | cardiac chamber morphogenesis | 8/478 | 151/28943 | 0.003719086 | 0.046846402 | 0.038086204 | Shox2/Pitx2/Gata3/Pou4f1/Sfrp2/Fzd1/Epor/Wnt2 | 8 |
| GO:0090130 | BP | GO:0090130 | tissue migration | 13/478 | 332/28943 | 0.003780656 | 0.047395099 | 0.038532296 | Calca/Gata3/Amotl1/Gpld1/Angpt1/Sparc/Agt/Itga3/Hspb1/Kitl/Shh/Sp100/Zeb2 | 13 |
| GO:0097553 | BP | GO:0097553 | calcium ion transmembrane import into cytosol | 9/478 | 185/28943 | 0.003786385 | 0.047395099 | 0.038532296 | Calca/Cxcl10/Npsr1/Camk2d/F2r/Grin2d/Ramp3/Cxcl9/Ryr1 | 9 |
| GO:0006112 | BP | GO:0006112 | energy reserve metabolic process | 6/478 | 90/28943 | 0.003807408 | 0.047509319 | 0.038625157 | Tcf7l2/Pygm/Grb10/Esrrb/Mrap2/Ppp1r1a | 6 |
| GO:0098773 | BP | GO:0098773 | skin epidermis development | 7/478 | 120/28943 | 0.003851426 | 0.047770711 | 0.038837669 | Mreg/Edaradd/Gal/Lgr5/Shh/Inhba/Fst | 7 |
| GO:0010171 | BP | GO:0010171 | body morphogenesis | 5/478 | 63/28943 | 0.003852284 | 0.047770711 | 0.038837669 | Mab21l2/Grem2/Tcf7l2/Lef1/Wnt3 | 5 |
| GO:0048469 | BP | GO:0048469 | cell maturation | 10/478 | 221/28943 | 0.003906548 | 0.048293638 | 0.03926281 | Foxa1/Ret/Calca/Gata3/Tal1/Fam20c/Epha8/Edn1/Runx2/Dazl | 10 |
| GO:0051924 | BP | GO:0051924 | regulation of calcium ion transport | 12/478 | 296/28943 | 0.004028441 | 0.049646808 | 0.04036294 | Calca/Cxcl10/Npsr1/Camk2d/Agt/F2r/Casr/Plpp4/Ramp3/Cckar/Cxcl9/Ccl5 | 12 |
| GO:0051260 | BP | GO:0051260 | protein homooligomerization | 9/478 | 187/28943 | 0.004062297 | 0.049756906 | 0.040452449 | Adcy8/Glra3/Kcnc2/Samhd1/Kcng4/Kctd9/Kctd8/Kctd1/Kctd16 | 9 |
| GO:1903305 | BP | GO:1903305 | regulation of regulated secretory pathway | 9/478 | 187/28943 | 0.004062297 | 0.049756906 | 0.040452449 | Grin3a/Chrna3/Glra3/Chrna4/Syt9/Chrnb3/Baiap3/Grm4/Kcnh1 | 9 |
| GO:0033692 | BP | GO:0033692 | cellular polysaccharide biosynthetic process | 5/478 | 64/28943 | 0.004123147 | 0.0499454 | 0.040605695 | Has1/Grb10/Esrrb/B3gnt8/Has3 | 5 |
| GO:0002031 | BP | GO:0002031 | G protein-coupled receptor internalization | 3/478 | 20/28943 | 0.004140227 | 0.0499454 | 0.040605695 | Calca/Necab2/Arr3 | 3 |
| GO:0007379 | BP | GO:0007379 | segment specification | 3/478 | 20/28943 | 0.004140227 | 0.0499454 | 0.040605695 | Irx1/Irx3/Irx2 | 3 |
| GO:0032656 | BP | GO:0032656 | regulation of interleukin-13 production | 3/478 | 20/28943 | 0.004140227 | 0.0499454 | 0.040605695 | Gata3/Lef1/Il17rb | 3 |
| GO:0072189 | BP | GO:0072189 | ureter development | 3/478 | 20/28943 | 0.004140227 | 0.0499454 | 0.040605695 | Ret/Gata3/Shh | 3 |
| GO:0019432 | BP | GO:0019432 | triglyceride biosynthetic process | 4/478 | 40/28943 | 0.004195798 | 0.050161145 | 0.040781097 | Tcf7l2/Gpld1/Gpat2/Mogat1 | 4 |
| GO:0030212 | BP | GO:0030212 | hyaluronan metabolic process | 4/478 | 40/28943 | 0.004195798 | 0.050161145 | 0.040781097 | Has1/Itih3/Lyve1/Has3 | 4 |
| GO:1905145 | BP | GO:1905145 | cellular response to acetylcholine | 4/478 | 40/28943 | 0.004195798 | 0.050161145 | 0.040781097 | Chrna3/Oprm1/Chrna4/Ache | 4 |
| GO:0043010 | BP | GO:0043010 | camera-type eye development | 14/478 | 376/28943 | 0.004227178 | 0.050385442 | 0.04096345 | Mab21l2/Pitx2/Rcn1/Mab21l1/Gata3/Slc17a6/Slitrk6/Crb1/Ache/Shh/Irx6/Inhba/Tmod1/Zeb2 | 14 |
| GO:0032024 | BP | GO:0032024 | positive regulation of insulin secretion | 6/478 | 92/28943 | 0.004242541 | 0.050418052 | 0.040989962 | Adcy8/Tcf7l2/Gpld1/Baiap3/Casr/Nnat | 6 |
| GO:0010959 | BP | GO:0010959 | regulation of metal ion transport | 16/478 | 458/28943 | 0.004289179 | 0.05082105 | 0.0413176 | Calca/Cxcl10/Npsr1/Camk2d/Gal/Agt/F2r/Cnksr3/Kcnc2/Casr/Plpp4/Ramp3/Cckar/Cxcl9/Ccl5/Lrrc26 | 16 |
| GO:0030534 | BP | GO:0030534 | adult behavior | 9/478 | 189/28943 | 0.004353679 | 0.051432664 | 0.041814843 | Chrna3/Slitrk6/Oprm1/Chrna4/Klhl1/Grin2d/Pbx3/Tmod1/Ppp1r1b | 9 |
| GO:0070534 | BP | GO:0070534 | protein K63-linked ubiquitination | 5/478 | 65/28943 | 0.004407336 | 0.051912955 | 0.04220532 | Trim30d/Rnf213/Trim21/Parp10/Ube2t | 5 |
| GO:0001649 | BP | GO:0001649 | osteoblast differentiation | 10/478 | 225/28943 | 0.004428787 | 0.052012192 | 0.042286001 | Shox2/Scube2/Sfrp2/Nell1/Gdpd2/Fzd1/Fam20c/Shh/Wnt3/Runx2 | 10 |
| GO:0050796 | BP | GO:0050796 | regulation of insulin secretion | 9/478 | 191/28943 | 0.004661108 | 0.054580069 | 0.044373689 | Adcy8/Tcf7l2/Gpld1/Syt9/Baiap3/Tfap2b/Casr/Nnat/Ccl5 | 9 |
| GO:0051899 | BP | GO:0051899 | membrane depolarization | 6/478 | 94/28943 | 0.004713332 | 0.054908195 | 0.044640456 | Hcn4/Chrna3/Chrna4/Camk2d/Hcn3/Edn1 | 6 |
| GO:0003228 | BP | GO:0003228 | atrial cardiac muscle tissue development | 3/478 | 21/28943 | 0.004771636 | 0.054908195 | 0.044640456 | Shox2/Pitx2/Wnt2 | 3 |
| GO:0021854 | BP | GO:0021854 | hypothalamus development | 3/478 | 21/28943 | 0.004771636 | 0.054908195 | 0.044640456 | Pitx2/Nhlh2/Foxb1 | 3 |
| GO:0032616 | BP | GO:0032616 | interleukin-13 production | 3/478 | 21/28943 | 0.004771636 | 0.054908195 | 0.044640456 | Gata3/Lef1/Il17rb | 3 |
| GO:0032674 | BP | GO:0032674 | regulation of interleukin-5 production | 3/478 | 21/28943 | 0.004771636 | 0.054908195 | 0.044640456 | Gata3/Lef1/Il17rb | 3 |
| GO:0051797 | BP | GO:0051797 | regulation of hair follicle development | 3/478 | 21/28943 | 0.004771636 | 0.054908195 | 0.044640456 | Gal/Inhba/Fst | 3 |
| GO:0090277 | BP | GO:0090277 | positive regulation of peptide hormone secretion | 7/478 | 125/28943 | 0.004814812 | 0.05524582 | 0.044914946 | Adcy8/Tcf7l2/Gpld1/Baiap3/Casr/Cckar/Nnat | 7 |
| GO:0043270 | BP | GO:0043270 | positive regulation of ion transport | 13/478 | 343/28943 | 0.00495352 | 0.056616456 | 0.046029275 | Cxcl10/Npsr1/Gal/Agt/F2r/Cnksr3/Kcnc2/Casr/Ramp3/Cxcl9/Edn1/Ccl5/Lrrc26 | 13 |
| GO:0008589 | BP | GO:0008589 | regulation of smoothened signaling pathway | 6/478 | 95/28943 | 0.004962625 | 0.056616456 | 0.046029275 | Foxa1/Shox2/Rora/Scube2/Shh/Runx2 | 6 |
| GO:0090175 | BP | GO:0090175 | regulation of establishment of planar polarity | 4/478 | 42/28943 | 0.005007708 | 0.056912582 | 0.046270026 | Wnt9b/Ror2/Sfrp2/Fzd1 | 4 |
| GO:0001707 | BP | GO:0001707 | mesoderm formation | 5/478 | 67/28943 | 0.005017087 | 0.056912582 | 0.046270026 | Lef1/Tal1/Sfrp2/Wnt3/Inhba | 5 |
| GO:0050708 | BP | GO:0050708 | regulation of protein secretion | 12/478 | 305/28943 | 0.00509517 | 0.057634601 | 0.046857028 | Adcy8/Tcf7l2/Oprm1/Gpld1/Rsad2/Syt9/F2r/Baiap3/Tfap2b/Casr/Nnat/Ccl5 | 12 |
| GO:0051099 | BP | GO:0051099 | positive regulation of binding | 9/478 | 194/28943 | 0.005153615 | 0.058131032 | 0.047260628 | Pitx2/Tcf7l2/Gata3/Pou4f1/Dtx3l/Zfp618/Trim21/Tunar/Parp9 | 9 |
| GO:0050900 | BP | GO:0050900 | leukocyte migration | 14/478 | 385/28943 | 0.00518637 | 0.058335711 | 0.047427032 | Calca/Tafa4/Cxcl10/Gata3/Vav3/Ror2/Itga3/Kitl/Asb2/Lyve1/Cxcl9/Itga7/Edn1/Ccl5 | 14 |
| GO:0061053 | BP | GO:0061053 | somite development | 6/478 | 96/28943 | 0.005221461 | 0.058565431 | 0.047613795 | Lef1/Ror2/Sfrp2/Shh/Foxb1/Zeb2 | 6 |
| GO:0050730 | BP | GO:0050730 | regulation of peptidyl-tyrosine phosphorylation | 11/478 | 268/28943 | 0.005271071 | 0.058791581 | 0.047797655 | Angpt1/Agt/Socs1/Parp14/Sfrp2/Kitl/Parp9/Nox4/Epha7/Ccl5/Itga5 | 11 |
| GO:1903522 | BP | GO:1903522 | regulation of blood circulation | 11/478 | 268/28943 | 0.005271071 | 0.058791581 | 0.047797655 | Shox2/Hcn4/Calca/Tacr3/Irx3/Agt/Kcnj5/F2r/Hcn3/Casr/Edn1 | 11 |
| GO:0045880 | BP | GO:0045880 | positive regulation of smoothened signaling pathway | 4/478 | 43/28943 | 0.005450499 | 0.059570039 | 0.048430543 | Foxa1/Shox2/Scube2/Shh | 4 |
| GO:0051281 | BP | GO:0051281 | positive regulation of release of sequestered calcium ion into cytosol | 4/478 | 43/28943 | 0.005450499 | 0.059570039 | 0.048430543 | Cxcl10/Npsr1/F2r/Cxcl9 | 4 |
| GO:0086065 | BP | GO:0086065 | cell communication involved in cardiac conduction | 4/478 | 43/28943 | 0.005450499 | 0.059570039 | 0.048430543 | Hcn4/Irx3/Kcnj5/Hcn3 | 4 |
| GO:1905144 | BP | GO:1905144 | response to acetylcholine | 4/478 | 43/28943 | 0.005450499 | 0.059570039 | 0.048430543 | Chrna3/Oprm1/Chrna4/Ache | 4 |
| GO:0032634 | BP | GO:0032634 | interleukin-5 production | 3/478 | 22/28943 | 0.005458048 | 0.059570039 | 0.048430543 | Gata3/Lef1/Il17rb | 3 |
| GO:0035634 | BP | GO:0035634 | response to stilbenoid | 3/478 | 22/28943 | 0.005458048 | 0.059570039 | 0.048430543 | Ifit3/Hba-a1/Saa3 | 3 |
| GO:0060438 | BP | GO:0060438 | trachea development | 3/478 | 22/28943 | 0.005458048 | 0.059570039 | 0.048430543 | Edaradd/Lef1/Shh | 3 |
| GO:0043500 | BP | GO:0043500 | muscle adaptation | 7/478 | 128/28943 | 0.00547386 | 0.059570039 | 0.048430543 | Tnnt1/Camk2d/Agt/Actn3/Asb2/Edn1/Srl | 7 |
| GO:0001570 | BP | GO:0001570 | vasculogenesis | 6/478 | 97/28943 | 0.005490051 | 0.059570039 | 0.048430543 | Pitx2/Angpt1/Xdh/Asb4/Shh/Epor | 6 |
| GO:0061515 | BP | GO:0061515 | myeloid cell development | 6/478 | 97/28943 | 0.005490051 | 0.059570039 | 0.048430543 | Tal1/Ank1/Fam20c/Alas2/Hba-a2/Hba-a1 | 6 |
| GO:0019932 | BP | GO:0019932 | second-messenger-mediated signaling | 12/478 | 309/28943 | 0.005636323 | 0.060991429 | 0.049586136 | Adcy8/L1cam/Oprm1/Gal/Ccr10/Rit2/Actn3/Kcnc2/Rcan3/Samd14/Edn1/Mafa | 12 |
| GO:0006940 | BP | GO:0006940 | regulation of smooth muscle contraction | 5/478 | 69/28943 | 0.005684313 | 0.061267678 | 0.049810726 | Calca/Tacr3/Chrna3/F2r/Edn1 | 5 |
| GO:0002793 | BP | GO:0002793 | positive regulation of peptide secretion | 7/478 | 129/28943 | 0.005707883 | 0.061267678 | 0.049810726 | Adcy8/Tcf7l2/Gpld1/Baiap3/Casr/Cckar/Nnat | 7 |
| GO:0003014 | BP | GO:0003014 | renal system process | 7/478 | 129/28943 | 0.005707883 | 0.061267678 | 0.049810726 | Chrna3/Agt/F2r/Tfap2b/Itga3/Clcn5/Edn1 | 7 |
| GO:0043542 | BP | GO:0043542 | endothelial cell migration | 10/478 | 234/28943 | 0.005805024 | 0.062143322 | 0.050522627 | Calca/Gata3/Amotl1/Gpld1/Angpt1/Sparc/Agt/Hspb1/Shh/Sp100 | 10 |
| GO:0050691 | BP | GO:0050691 | regulation of defense response to virus by host | 4/478 | 44/28943 | 0.005918692 | 0.063022229 | 0.051237179 | Dtx3l/Stat1/Parp9/Ccl5 | 4 |
| GO:0085029 | BP | GO:0085029 | extracellular matrix assembly | 4/478 | 44/28943 | 0.005918692 | 0.063022229 | 0.051237179 | Ntng1/Has1/Agt/Has3 | 4 |
| GO:0090276 | BP | GO:0090276 | regulation of peptide hormone secretion | 10/478 | 235/28943 | 0.005976473 | 0.063468238 | 0.051599785 | Adcy8/Tcf7l2/Gpld1/Syt9/Baiap3/Tfap2b/Casr/Cckar/Nnat/Ccl5 | 10 |
| GO:0034764 | BP | GO:0034764 | positive regulation of transmembrane transport | 11/478 | 273/28943 | 0.006031594 | 0.063471207 | 0.051602199 | Cxcl10/Npsr1/Gal/Agt/F2r/Cnksr3/Kcnc2/Ramp3/Cxcl9/Edn1/Lrrc26 | 11 |
| GO:0000768 | BP | GO:0000768 | syncytium formation by plasma membrane fusion | 5/478 | 70/28943 | 0.006040335 | 0.063471207 | 0.051602199 | Cxcl10/Adamts15/Vash2/Stat1/Cxcl9 | 5 |
| GO:0061337 | BP | GO:0061337 | cardiac conduction | 5/478 | 70/28943 | 0.006040335 | 0.063471207 | 0.051602199 | Hcn4/Irx3/Agt/Kcnj5/Hcn3 | 5 |
| GO:0140253 | BP | GO:0140253 | cell-cell fusion | 5/478 | 70/28943 | 0.006040335 | 0.063471207 | 0.051602199 | Cxcl10/Adamts15/Vash2/Stat1/Cxcl9 | 5 |
| GO:0008016 | BP | GO:0008016 | regulation of heart contraction | 9/478 | 199/28943 | 0.006063042 | 0.063542594 | 0.051660237 | Shox2/Hcn4/Calca/Tacr3/Irx3/Agt/Kcnj5/Hcn3/Edn1 | 9 |
| GO:0021535 | BP | GO:0021535 | cell migration in hindbrain | 3/478 | 23/28943 | 0.0062007 | 0.064143507 | 0.05214878 | Pou4f1/Nhlh2/Lef1 | 3 |
| GO:0030539 | BP | GO:0030539 | male genitalia development | 3/478 | 23/28943 | 0.0062007 | 0.064143507 | 0.05214878 | Wnt9b/Tex15/Shh | 3 |
| GO:0042481 | BP | GO:0042481 | regulation of odontogenesis | 3/478 | 23/28943 | 0.0062007 | 0.064143507 | 0.05214878 | Shh/Edn1/Runx2 | 3 |
| GO:0043501 | BP | GO:0043501 | skeletal muscle adaptation | 3/478 | 23/28943 | 0.0062007 | 0.064143507 | 0.05214878 | Tnnt1/Actn3/Asb2 | 3 |
| GO:0051043 | BP | GO:0051043 | regulation of membrane protein ectodomain proteolysis | 3/478 | 23/28943 | 0.0062007 | 0.064143507 | 0.05214878 | Gpld1/Timp2/Timp1 | 3 |
| GO:0042886 | BP | GO:0042886 | amide transport | 13/478 | 353/28943 | 0.006258069 | 0.06424615 | 0.052232229 | Adcy8/Tcf7l2/Gpld1/Syt9/Agt/Baiap3/Tfap2b/Casr/Cckar/Nnat/Edn1/Mafa/Ccl5 | 13 |
| GO:0021915 | BP | GO:0021915 | neural tube development | 9/478 | 200/28943 | 0.006258891 | 0.06424615 | 0.052232229 | Foxa1/Tcf7l2/Gbx2/Sfrp2/Fzd1/Shh/Foxb1/Stil/Zeb2 | 9 |
| GO:0030308 | BP | GO:0030308 | negative regulation of cell growth | 9/478 | 200/28943 | 0.006258891 | 0.06424615 | 0.052232229 | Trim40/Minar1/Agt/Sema4g/Sfrp2/Cda/Wnt3/Inhba/Epha7 | 9 |
| GO:0060326 | BP | GO:0060326 | cell chemotaxis | 12/478 | 314/28943 | 0.0063759 | 0.064991662 | 0.052838331 | Calca/Tafa4/Cxcl10/Ccr10/Lef1/Vav3/Hspb1/Shh/Cxcl9/Edn1/Ccl5/Saa3 | 12 |
| GO:0007193 | BP | GO:0007193 | adenylate cyclase-inhibiting G protein-coupled receptor signaling pathway | 5/478 | 71/28943 | 0.006411749 | 0.064991662 | 0.052838331 | Oprm1/Akap12/Casr/Grm4/Edn1 | 5 |
| GO:0048332 | BP | GO:0048332 | mesoderm morphogenesis | 5/478 | 71/28943 | 0.006411749 | 0.064991662 | 0.052838331 | Lef1/Tal1/Sfrp2/Wnt3/Inhba | 5 |
| GO:0034331 | BP | GO:0034331 | cell junction maintenance | 4/478 | 45/28943 | 0.006412901 | 0.064991662 | 0.052838331 | Cbln4/Cbln1/F2r/Plekha7 | 4 |
| GO:0042554 | BP | GO:0042554 | superoxide anion generation | 4/478 | 45/28943 | 0.006412901 | 0.064991662 | 0.052838331 | Tafa4/Agt/Nox4/Edn1 | 4 |
| GO:0007200 | BP | GO:0007200 | phospholipase C-activating G protein-coupled receptor signaling pathway | 6/478 | 101/28943 | 0.006666139 | 0.067047592 | 0.054509806 | Calca/Oprm1/Gpr139/F2r/Casr/Edn1 | 6 |
| GO:0014066 | BP | GO:0014066 | regulation of phosphatidylinositol 3-kinase signaling | 6/478 | 101/28943 | 0.006666139 | 0.067047592 | 0.054509806 | Angpt1/Agt/F2r/Ror2/Btn2a2/Ccl5 | 6 |
| GO:0043502 | BP | GO:0043502 | regulation of muscle adaptation | 6/478 | 101/28943 | 0.006666139 | 0.067047592 | 0.054509806 | Tnnt1/Camk2d/Agt/Actn3/Edn1/Srl | 6 |
| GO:0000271 | BP | GO:0000271 | polysaccharide biosynthetic process | 5/478 | 72/28943 | 0.006798889 | 0.067700655 | 0.055040747 | Has1/Grb10/Esrrb/B3gnt8/Has3 | 5 |
| GO:0006949 | BP | GO:0006949 | syncytium formation | 5/478 | 72/28943 | 0.006798889 | 0.067700655 | 0.055040747 | Cxcl10/Adamts15/Vash2/Stat1/Cxcl9 | 5 |
| GO:0043506 | BP | GO:0043506 | regulation of JUN kinase activity | 5/478 | 72/28943 | 0.006798889 | 0.067700655 | 0.055040747 | Fzd10/Ror2/Sfrp2/Edn1/Zeb2 | 5 |
| GO:0055008 | BP | GO:0055008 | cardiac muscle tissue morphogenesis | 5/478 | 72/28943 | 0.006798889 | 0.067700655 | 0.055040747 | Pitx2/Pou4f1/Angpt1/Epor/Wnt2 | 5 |
| GO:0002791 | BP | GO:0002791 | regulation of peptide secretion | 10/478 | 240/28943 | 0.006893732 | 0.068474304 | 0.055669726 | Adcy8/Tcf7l2/Gpld1/Syt9/Baiap3/Tfap2b/Casr/Cckar/Nnat/Ccl5 | 10 |
| GO:0043586 | BP | GO:0043586 | tongue development | 3/478 | 24/28943 | 0.007000721 | 0.069192767 | 0.056253837 | Lef1/Shh/Bnc2 | 3 |
| GO:0048643 | BP | GO:0048643 | positive regulation of skeletal muscle tissue development | 3/478 | 24/28943 | 0.007000721 | 0.069192767 | 0.056253837 | Shox2/Actn3/Shh | 3 |
| GO:1905330 | BP | GO:1905330 | regulation of morphogenesis of an epithelium | 5/478 | 73/28943 | 0.007202086 | 0.071007229 | 0.057728998 | Cxcl10/Gata3/Agt/Shh/Wnt2 | 5 |
| GO:0090090 | BP | GO:0090090 | negative regulation of canonical Wnt signaling pathway | 7/478 | 135/28943 | 0.007272423 | 0.071343138 | 0.058002092 | Tcf7l2/Dkk2/Ror2/Rbms3/Sfrp2/Fzd1/Shh | 7 |
| GO:0060047 | BP | GO:0060047 | heart contraction | 10/478 | 242/28943 | 0.007289757 | 0.071343138 | 0.058002092 | Shox2/Hcn4/Calca/Tacr3/Camk2d/Irx3/Agt/Kcnj5/Hcn3/Edn1 | 10 |
| GO:0090087 | BP | GO:0090087 | regulation of peptide transport | 10/478 | 242/28943 | 0.007289757 | 0.071343138 | 0.058002092 | Adcy8/Tcf7l2/Gpld1/Syt9/Baiap3/Tfap2b/Casr/Cckar/Nnat/Ccl5 | 10 |
| GO:0018108 | BP | GO:0018108 | peptidyl-tyrosine phosphorylation | 12/478 | 320/28943 | 0.007362443 | 0.071878326 | 0.058437201 | Angpt1/Agt/Socs1/Parp14/Sfrp2/Kitl/Ptpn4/Parp9/Nox4/Epha7/Ccl5/Itga5 | 12 |
| GO:0010907 | BP | GO:0010907 | positive regulation of glucose metabolic process | 4/478 | 47/28943 | 0.007481749 | 0.072742043 | 0.059139404 | Tcf7l2/Gpld1/Actn3/Esrrb | 4 |
| GO:0052548 | BP | GO:0052548 | regulation of endopeptidase activity | 13/478 | 361/28943 | 0.007487348 | 0.072742043 | 0.059139404 | Ret/Xdh/Agt/F2r/Sfrp2/Stat1/Serpina3g/Tnfsf10/Timp2/Serpina3f/Epha7/Serpinb8/Timp1 | 13 |
| GO:0014068 | BP | GO:0014068 | positive regulation of phosphatidylinositol 3-kinase signaling | 5/478 | 74/28943 | 0.007621667 | 0.073867277 | 0.060054222 | Angpt1/Agt/F2r/Ror2/Ccl5 | 5 |
| GO:0052547 | BP | GO:0052547 | regulation of peptidase activity | 15/478 | 445/28943 | 0.007650011 | 0.073888347 | 0.060071352 | Ret/Xdh/Agt/Itih3/F2r/Sfrp2/Stat1/Serpina3g/Tnfsf10/Timp2/Serpina3f/A2ml1/Epha7/Serpinb8/Timp1 | 15 |
| GO:0051153 | BP | GO:0051153 | regulation of striated muscle cell differentiation | 6/478 | 104/28943 | 0.00766085 | 0.073888347 | 0.060071352 | Shox2/Smyd1/Actn3/Shh/Mylk3/Edn1 | 6 |
| GO:0018212 | BP | GO:0018212 | peptidyl-tyrosine modification | 12/478 | 322/28943 | 0.007716685 | 0.074247523 | 0.060363362 | Angpt1/Agt/Socs1/Parp14/Sfrp2/Kitl/Ptpn4/Parp9/Nox4/Epha7/Ccl5/Itga5 | 12 |
| GO:0035988 | BP | GO:0035988 | chondrocyte proliferation | 3/478 | 25/28943 | 0.007859136 | 0.075075429 | 0.061036452 | Lef1/Scube2/Prkg2 | 3 |
| GO:0036315 | BP | GO:0036315 | cellular response to sterol | 3/478 | 25/28943 | 0.007859136 | 0.075075429 | 0.061036452 | Gpld1/Rora/Inhba | 3 |
| GO:0048333 | BP | GO:0048333 | mesodermal cell differentiation | 3/478 | 25/28943 | 0.007859136 | 0.075075429 | 0.061036452 | Tal1/Sfrp2/Inhba | 3 |
| GO:0035137 | BP | GO:0035137 | hindlimb morphogenesis | 4/478 | 48/28943 | 0.008057534 | 0.076245086 | 0.061987384 | Pitx2/Tfap2b/Shh/Wnt3 | 4 |
| GO:0090317 | BP | GO:0090317 | negative regulation of intracellular protein transport | 4/478 | 48/28943 | 0.008057534 | 0.076245086 | 0.061987384 | Siah3/Angpt1/Derl3/Sp100 | 4 |
| GO:1990573 | BP | GO:1990573 | potassium ion import across plasma membrane | 4/478 | 48/28943 | 0.008057534 | 0.076245086 | 0.061987384 | Hcn4/Kcnj16/Kcnj5/Kcnj12 | 4 |
| GO:0034637 | BP | GO:0034637 | cellular carbohydrate biosynthetic process | 5/478 | 75/28943 | 0.008057958 | 0.076245086 | 0.061987384 | Has1/Grb10/Esrrb/B3gnt8/Has3 | 5 |
| GO:0022409 | BP | GO:0022409 | positive regulation of cell-cell adhesion | 12/478 | 324/28943 | 0.008084163 | 0.076312206 | 0.062041953 | L1cam/Gata3/Socs1/Lef1/Kitl/Btn2a2/Shh/Cd274/Mex3b/Ccl5/Il1rl2/H2-Ob | 12 |
| GO:0050870 | BP | GO:0050870 | positive regulation of T cell activation | 10/478 | 246/28943 | 0.008134394 | 0.076605269 | 0.062280214 | Gata3/Socs1/Lef1/Kitl/Btn2a2/Shh/Cd274/Ccl5/Il1rl2/H2-Ob | 10 |
| GO:0001704 | BP | GO:0001704 | formation of primary germ layer | 6/478 | 106/28943 | 0.008380729 | 0.078739417 | 0.06401528 | Lef1/Tal1/Sfrp2/Wnt3/Inhba/Itga5 | 6 |
| GO:0007422 | BP | GO:0007422 | peripheral nervous system development | 5/478 | 76/28943 | 0.008511277 | 0.079778236 | 0.064859842 | Pou4f1/Nhlh2/Agt/Nefh/Onecut2 | 5 |
| GO:0010632 | BP | GO:0010632 | regulation of epithelial cell migration | 10/478 | 248/28943 | 0.008583982 | 0.08027129 | 0.065260695 | Gata3/Amotl1/Gpld1/Angpt1/Sparc/Agt/Itga3/Hspb1/Shh/Sp100 | 10 |
| GO:0006821 | BP | GO:0006821 | chloride transport | 6/478 | 107/28943 | 0.008758303 | 0.081502419 | 0.066261605 | Glra3/Gabrq/Ano5/Prkg2/Casr/Clcn5 | 6 |
| GO:0007205 | BP | GO:0007205 | protein kinase C-activating G protein-coupled receptor signaling pathway | 3/478 | 26/28943 | 0.00877687 | 0.081502419 | 0.066261605 | F2r/Edn1/Dgkh | 3 |
| GO:0046386 | BP | GO:0046386 | deoxyribose phosphate catabolic process | 3/478 | 26/28943 | 0.00877687 | 0.081502419 | 0.066261605 | Xdh/Samhd1/Cda | 3 |
| GO:0060828 | BP | GO:0060828 | regulation of canonical Wnt signaling pathway | 10/478 | 249/28943 | 0.008815809 | 0.081674072 | 0.06640116 | Fzd9/Tcf7l2/Dkk2/Ror2/Rbms3/Sfrp2/Lgr5/Fzd1/Shh/Zeb2 | 10 |
| GO:0010563 | BP | GO:0010563 | negative regulation of phosphorus metabolic process | 15/478 | 453/28943 | 0.008920928 | 0.082266203 | 0.066882563 | Angpt1/Xdh/Agt/Socs1/Cnksr3/Actn3/Adarb1/Dbndd1/Parp14/Sfrp2/Hspb1/Grb10/Cda/Camk2n2/Ppp1r1b | 15 |
| GO:0045936 | BP | GO:0045936 | negative regulation of phosphate metabolic process | 15/478 | 453/28943 | 0.008920928 | 0.082266203 | 0.066882563 | Angpt1/Xdh/Agt/Socs1/Cnksr3/Actn3/Adarb1/Dbndd1/Parp14/Sfrp2/Hspb1/Grb10/Cda/Camk2n2/Ppp1r1b | 15 |
| GO:0007159 | BP | GO:0007159 | leukocyte cell-cell adhesion | 14/478 | 411/28943 | 0.008974075 | 0.082448012 | 0.067030374 | Calca/L1cam/Gata3/Socs1/Lef1/Hspb1/Kitl/Btn2a2/Shh/Cd274/Ccl5/Il1rl2/Itga5/H2-Ob | 14 |
| GO:0001756 | BP | GO:0001756 | somitogenesis | 5/478 | 77/28943 | 0.00898194 | 0.082448012 | 0.067030374 | Lef1/Ror2/Sfrp2/Foxb1/Zeb2 | 5 |
| GO:0090263 | BP | GO:0090263 | positive regulation of canonical Wnt signaling pathway | 6/478 | 108/28943 | 0.009147901 | 0.083778827 | 0.068112329 | Fzd9/Dkk2/Ror2/Sfrp2/Lgr5/Zeb2 | 6 |
| GO:0002831 | BP | GO:0002831 | regulation of response to biotic stimulus | 13/478 | 371/28943 | 0.009284153 | 0.084540327 | 0.06873143 | Dtx3l/Socs1/Trim30d/Samhd1/Parp14/Stat1/Trim21/Oasl1/Isg15/Cd274/Parp9/Usp29/Ccl5 | 13 |
| GO:0031589 | BP | GO:0031589 | cell-substrate adhesion | 13/478 | 371/28943 | 0.009284153 | 0.084540327 | 0.06873143 | Ntng1/L1cam/Angpt1/Agt/Actn3/Vwc2/Itga3/Plekha2/Itga7/Onecut2/Itga5/Itga8/Meltf | 13 |
| GO:0007157 | BP | GO:0007157 | heterophilic cell-cell adhesion via plasma membrane cell adhesion molecules | 4/478 | 50/28943 | 0.009294566 | 0.084540327 | 0.06873143 | Cbln1/L1cam/Crb1/Itga5 | 4 |
| GO:0071277 | BP | GO:0071277 | cellular response to calcium ion | 5/478 | 78/28943 | 0.009470257 | 0.085792026 | 0.069749063 | Adcy8/Gpld1/Syt9/Krt10/Kcnh1 | 5 |
| GO:0051224 | BP | GO:0051224 | negative regulation of protein transport | 7/478 | 142/28943 | 0.009475152 | 0.085792026 | 0.069749063 | Siah3/Oprm1/Angpt1/Rsad2/F2r/Derl3/Sp100 | 7 |
| GO:0045055 | BP | GO:0045055 | regulated exocytosis | 11/478 | 291/28943 | 0.009506285 | 0.085879174 | 0.069819915 | Grin3a/Chrna3/Glra3/Chrna4/Syt9/Chrnb3/Baiap3/Unc13c/Grm4/Vamp1/Kcnh1 | 11 |
| GO:0016525 | BP | GO:0016525 | negative regulation of angiogenesis | 6/478 | 109/28943 | 0.009549725 | 0.086076867 | 0.069980639 | Cxcl10/Sparc/Minar1/Agt/Stat1/Ccn6 | 6 |
| GO:0009264 | BP | GO:0009264 | deoxyribonucleotide catabolic process | 3/478 | 27/28943 | 0.00975475 | 0.087138067 | 0.070843397 | Xdh/Samhd1/Cda | 3 |
| GO:0062009 | BP | GO:0062009 | secondary palate development | 3/478 | 27/28943 | 0.00975475 | 0.087138067 | 0.070843397 | Lef1/Fzd1/Col11a2 | 3 |
| GO:0098901 | BP | GO:0098901 | regulation of cardiac muscle cell action potential | 3/478 | 27/28943 | 0.00975475 | 0.087138067 | 0.070843397 | Hcn4/Camk2d/Hcn3 | 3 |
| GO:1901018 | BP | GO:1901018 | positive regulation of potassium ion transmembrane transporter activity | 3/478 | 27/28943 | 0.00975475 | 0.087138067 | 0.070843397 | Gal/Kcnc2/Lrrc26 | 3 |
| GO:0045646 | BP | GO:0045646 | regulation of erythrocyte differentiation | 4/478 | 51/28943 | 0.009956857 | 0.088722292 | 0.072131374 | Tal1/Stat1/Isg15/Inhba | 4 |
| GO:0048002 | BP | GO:0048002 | antigen processing and presentation of peptide antigen | 5/478 | 79/28943 | 0.009976536 | 0.088722292 | 0.072131374 | Tapbpl/H2-Q2/H2-T24/Clec4a2/H2-Ob | 5 |
| GO:0017157 | BP | GO:0017157 | regulation of exocytosis | 10/478 | 254/28943 | 0.01004774 | 0.089156944 | 0.072484747 | Grin3a/Chrna3/Glra3/Chrna4/Syt9/Rab3c/Chrnb3/Baiap3/Grm4/Kcnh1 | 10 |
| GO:2000181 | BP | GO:2000181 | negative regulation of blood vessel morphogenesis | 6/478 | 111/28943 | 0.010390844 | 0.091996987 | 0.074793707 | Cxcl10/Sparc/Minar1/Agt/Stat1/Ccn6 | 6 |
| GO:0005977 | BP | GO:0005977 | glycogen metabolic process | 5/478 | 80/28943 | 0.010501078 | 0.092358596 | 0.075087696 | Tcf7l2/Pygm/Grb10/Esrrb/Ppp1r1a | 5 |
| GO:0006073 | BP | GO:0006073 | cellular glucan metabolic process | 5/478 | 80/28943 | 0.010501078 | 0.092358596 | 0.075087696 | Tcf7l2/Pygm/Grb10/Esrrb/Ppp1r1a | 5 |
| GO:0051865 | BP | GO:0051865 | protein autoubiquitination | 5/478 | 80/28943 | 0.010501078 | 0.092358596 | 0.075087696 | Dtx3l/Asb4/Rnf213/Trim21/Ube2t | 5 |
| GO:0007588 | BP | GO:0007588 | excretion | 4/478 | 52/28943 | 0.010648997 | 0.09324878 | 0.075811417 | Chrna3/Npsr1/Agt/Edn1 | 4 |
| GO:0019083 | BP | GO:0019083 | viral transcription | 4/478 | 52/28943 | 0.010648997 | 0.09324878 | 0.075811417 | Lef1/Trim21/Sp100/Ccl5 | 4 |
| GO:0050770 | BP | GO:0050770 | regulation of axonogenesis | 8/478 | 181/28943 | 0.010718628 | 0.09365313 | 0.076140154 | Shox2/Ret/L1cam/Sema4g/Ache/Wnt3/Epha7/Zeb2 | 8 |
| GO:0032469 | BP | GO:0032469 | endoplasmic reticulum calcium ion homeostasis | 3/478 | 28/28943 | 0.010793512 | 0.09401373 | 0.076433322 | Atp2a1/Tmtc4/Camk2d | 3 |
| GO:0071346 | BP | GO:0071346 | cellular response to interferon-gamma | 6/478 | 112/28943 | 0.010830532 | 0.09401373 | 0.076433322 | Gbp6/Socs1/Parp14/Stat1/Parp9/Ccl5 | 6 |
| GO:1901343 | BP | GO:1901343 | negative regulation of vasculature development | 6/478 | 112/28943 | 0.010830532 | 0.09401373 | 0.076433322 | Cxcl10/Sparc/Minar1/Agt/Stat1/Ccn6 | 6 |
| GO:1904950 | BP | GO:1904950 | negative regulation of establishment of protein localization | 7/478 | 146/28943 | 0.010933796 | 0.094704224 | 0.076994695 | Siah3/Oprm1/Angpt1/Rsad2/F2r/Derl3/Sp100 | 7 |
| GO:0044042 | BP | GO:0044042 | glucan metabolic process | 5/478 | 81/28943 | 0.011044178 | 0.094912208 | 0.077163787 | Tcf7l2/Pygm/Grb10/Esrrb/Ppp1r1a | 5 |
| GO:0003253 | BP | GO:0003253 | cardiac neural crest cell migration involved in outflow tract morphogenesis | 2/478 | 10/28943 | 0.011219274 | 0.094912208 | 0.077163787 | Pitx2/Edn1 | 2 |
| GO:0014883 | BP | GO:0014883 | transition between fast and slow fiber | 2/478 | 10/28943 | 0.011219274 | 0.094912208 | 0.077163787 | Tnnt1/Actn3 | 2 |
| GO:0015671 | BP | GO:0015671 | oxygen transport | 2/478 | 10/28943 | 0.011219274 | 0.094912208 | 0.077163787 | Hbb-bt/Hba-a1 | 2 |
| GO:0033504 | BP | GO:0033504 | floor plate development | 2/478 | 10/28943 | 0.011219274 | 0.094912208 | 0.077163787 | Foxb1/Stil | 2 |
| GO:0035095 | BP | GO:0035095 | behavioral response to nicotine | 2/478 | 10/28943 | 0.011219274 | 0.094912208 | 0.077163787 | Chrna3/Chrna4 | 2 |
| GO:0060297 | BP | GO:0060297 | regulation of sarcomere organization | 2/478 | 10/28943 | 0.011219274 | 0.094912208 | 0.077163787 | Mylk3/Edn1 | 2 |
| GO:0061525 | BP | GO:0061525 | hindgut development | 2/478 | 10/28943 | 0.011219274 | 0.094912208 | 0.077163787 | Tcf7l2/Shh | 2 |
| GO:0071895 | BP | GO:0071895 | odontoblast differentiation | 2/478 | 10/28943 | 0.011219274 | 0.094912208 | 0.077163787 | Lef1/Fam20c | 2 |
| GO:1902732 | BP | GO:1902732 | positive regulation of chondrocyte proliferation | 2/478 | 10/28943 | 0.011219274 | 0.094912208 | 0.077163787 | Lef1/Scube2 | 2 |
| GO:1903596 | BP | GO:1903596 | regulation of gap junction assembly | 2/478 | 10/28943 | 0.011219274 | 0.094912208 | 0.077163787 | Irx3/Agt | 2 |
| GO:0006639 | BP | GO:0006639 | acylglycerol metabolic process | 7/478 | 147/28943 | 0.01132256 | 0.095191288 | 0.077390679 | Tcf7l2/Dgkk/Gpld1/Gpat2/Slc22a4/Mogat1/Dgkh | 7 |
| GO:0072089 | BP | GO:0072089 | stem cell proliferation | 7/478 | 147/28943 | 0.01132256 | 0.095191288 | 0.077390679 | Shox2/Eif2ak2/Sfrp2/Kitl/Shh/Wnt3/Runx2 | 7 |
| GO:0046189 | BP | GO:0046189 | phenol-containing compound biosynthetic process | 4/478 | 53/28943 | 0.011371461 | 0.095191288 | 0.077390679 | Dao/Gata3/Tyrp1/Zeb2 | 4 |
| GO:0046460 | BP | GO:0046460 | neutral lipid biosynthetic process | 4/478 | 53/28943 | 0.011371461 | 0.095191288 | 0.077390679 | Tcf7l2/Gpld1/Gpat2/Mogat1 | 4 |
| GO:0046463 | BP | GO:0046463 | acylglycerol biosynthetic process | 4/478 | 53/28943 | 0.011371461 | 0.095191288 | 0.077390679 | Tcf7l2/Gpld1/Gpat2/Mogat1 | 4 |
| GO:0060348 | BP | GO:0060348 | bone development | 10/478 | 259/28943 | 0.011406685 | 0.09528639 | 0.077467997 | Shox2/Pitx2/Sparc/Actn3/Tal1/Scube2/Fam20c/Bnc2/Runx2/Ryr1 | 10 |
| GO:0051279 | BP | GO:0051279 | regulation of release of sequestered calcium ion into cytosol | 5/478 | 82/28943 | 0.011606128 | 0.096750042 | 0.078657949 | Cxcl10/Npsr1/Camk2d/F2r/Cxcl9 | 5 |
| GO:0001508 | BP | GO:0001508 | action potential | 7/478 | 148/28943 | 0.011721237 | 0.097332568 | 0.079131543 | Hcn4/Chrna4/Camk2d/Kcnj5/Kcnc2/Hcn3/Kcnh7 | 7 |
| GO:0010906 | BP | GO:0010906 | regulation of glucose metabolic process | 6/478 | 114/28943 | 0.011749135 | 0.097332568 | 0.079131543 | Tcf7l2/Gpld1/Rora/Actn3/Esrrb/Igfbp4 | 6 |
| GO:0050886 | BP | GO:0050886 | endocrine process | 6/478 | 114/28943 | 0.011749135 | 0.097332568 | 0.079131543 | Gata3/Gal/Agt/F2r/Inhba/Edn1 | 6 |
| GO:0001919 | BP | GO:0001919 | regulation of receptor recycling | 3/478 | 29/28943 | 0.011893802 | 0.097720064 | 0.079446578 | Ramp3/Ache/Gria2 | 3 |
| GO:0007271 | BP | GO:0007271 | synaptic transmission, cholinergic | 3/478 | 29/28943 | 0.011893802 | 0.097720064 | 0.079446578 | Chrna3/Chrna4/Chrnb3 | 3 |
| GO:0048745 | BP | GO:0048745 | smooth muscle tissue development | 3/478 | 29/28943 | 0.011893802 | 0.097720064 | 0.079446578 | Tfap2b/Shh/Itga8 | 3 |
| GO:1901863 | BP | GO:1901863 | positive regulation of muscle tissue development | 3/478 | 29/28943 | 0.011893802 | 0.097720064 | 0.079446578 | Shox2/Actn3/Shh | 3 |
| GO:0045926 | BP | GO:0045926 | negative regulation of growth | 10/478 | 261/28943 | 0.011987569 | 0.098288216 | 0.079908487 | Trim40/Tcf7l2/Minar1/Agt/Sema4g/Sfrp2/Cda/Wnt3/Inhba/Epha7 | 10 |
| GO:0006638 | BP | GO:0006638 | neutral lipid metabolic process | 7/478 | 149/28943 | 0.012129963 | 0.099251933 | 0.08069199 | Tcf7l2/Dgkk/Gpld1/Gpat2/Slc22a4/Mogat1/Dgkh | 7 |
| GO:0061448 | BP | GO:0061448 | connective tissue development | 11/478 | 302/28943 | 0.012286705 | 0.10032886 | 0.081567534 | Foxa1/Shox2/Gpld1/Scube2/Prkg2/Ror2/Sfrp2/Bmp1/Edn1/Col11a2/Runx2 | 11 |
| GO:0019233 | BP | GO:0019233 | sensory perception of pain | 7/478 | 150/28943 | 0.012548873 | 0.102260506 | 0.083137966 | Calca/Tafa4/Oprm1/Chrna4/F2r/Grin2d/Edn1 | 7 |
| GO:1903510 | BP | GO:1903510 | mucopolysaccharide metabolic process | 5/478 | 84/28943 | 0.012787717 | 0.102827078 | 0.083598589 | Has1/Angpt1/Itih3/Lyve1/Has3 | 5 |
| GO:0001961 | BP | GO:0001961 | positive regulation of cytokine-mediated signaling pathway | 4/478 | 55/28943 | 0.012909179 | 0.102827078 | 0.083598589 | Parp14/Parp9/Usp29/Edn1 | 4 |
| GO:0032355 | BP | GO:0032355 | response to estradiol | 4/478 | 55/28943 | 0.012909179 | 0.102827078 | 0.083598589 | Foxa1/Tacr3/Pou4f1/Ramp3 | 4 |
| GO:0046580 | BP | GO:0046580 | negative regulation of Ras protein signal transduction | 4/478 | 55/28943 | 0.012909179 | 0.102827078 | 0.083598589 | Arhgap24/Trim67/Itga3/Timp2 | 4 |
| GO:0098926 | BP | GO:0098926 | postsynaptic signal transduction | 4/478 | 55/28943 | 0.012909179 | 0.102827078 | 0.083598589 | Chrna3/Oprm1/Chrna4/Ache | 4 |
| GO:1902476 | BP | GO:1902476 | chloride transmembrane transport | 4/478 | 55/28943 | 0.012909179 | 0.102827078 | 0.083598589 | Glra3/Gabrq/Ano5/Casr | 4 |
| GO:0051928 | BP | GO:0051928 | positive regulation of calcium ion transport | 7/478 | 151/28943 | 0.012978098 | 0.102827078 | 0.083598589 | Cxcl10/Npsr1/F2r/Casr/Ramp3/Cxcl9/Ccl5 | 7 |
| GO:0002029 | BP | GO:0002029 | desensitization of G protein-coupled receptor signaling pathway | 3/478 | 30/28943 | 0.01305618 | 0.102827078 | 0.083598589 | Calca/Necab2/Arr3 | 3 |
| GO:0022401 | BP | GO:0022401 | negative adaptation of signaling pathway | 3/478 | 30/28943 | 0.01305618 | 0.102827078 | 0.083598589 | Calca/Necab2/Arr3 | 3 |
| GO:0034311 | BP | GO:0034311 | diol metabolic process | 3/478 | 30/28943 | 0.01305618 | 0.102827078 | 0.083598589 | Pcbd1/Sptssb/Sgpp2 | 3 |
| GO:0045762 | BP | GO:0045762 | positive regulation of adenylate cyclase activity | 3/478 | 30/28943 | 0.01305618 | 0.102827078 | 0.083598589 | Vipr2/Calca/Timp2 | 3 |
| GO:0045932 | BP | GO:0045932 | negative regulation of muscle contraction | 3/478 | 30/28943 | 0.01305618 | 0.102827078 | 0.083598589 | Atp2a1/Calca/Tnnt1 | 3 |
| GO:0046339 | BP | GO:0046339 | diacylglycerol metabolic process | 3/478 | 30/28943 | 0.01305618 | 0.102827078 | 0.083598589 | Dgkk/Mogat1/Dgkh | 3 |
| GO:0048668 | BP | GO:0048668 | collateral sprouting | 3/478 | 30/28943 | 0.01305618 | 0.102827078 | 0.083598589 | Wnt3/Epha7/Zeb2 | 3 |
| GO:0071312 | BP | GO:0071312 | cellular response to alkaloid | 3/478 | 30/28943 | 0.01305618 | 0.102827078 | 0.083598589 | Adcy8/Ryr1/Ppp1r1b | 3 |
| GO:0071353 | BP | GO:0071353 | cellular response to interleukin-4 | 3/478 | 30/28943 | 0.01305618 | 0.102827078 | 0.083598589 | Gata3/Lef1/Parp14 | 3 |
| GO:0086019 | BP | GO:0086019 | cell-cell signaling involved in cardiac conduction | 3/478 | 30/28943 | 0.01305618 | 0.102827078 | 0.083598589 | Hcn4/Kcnj5/Hcn3 | 3 |
| GO:0015698 | BP | GO:0015698 | inorganic anion transport | 7/478 | 152/28943 | 0.013417773 | 0.104556018 | 0.085004221 | Glra3/Gabrq/Ano5/Prkg2/Casr/Clcn5/Slc26a10 | 7 |
| GO:0002246 | BP | GO:0002246 | wound healing involved in inflammatory response | 2/478 | 11/28943 | 0.013563741 | 0.104556018 | 0.085004221 | F2r/Timp1 | 2 |
| GO:0002357 | BP | GO:0002357 | defense response to tumor cell | 2/478 | 11/28943 | 0.013563741 | 0.104556018 | 0.085004221 | Rbms3/Plk5 | 2 |
| GO:0014889 | BP | GO:0014889 | muscle atrophy | 2/478 | 11/28943 | 0.013563741 | 0.104556018 | 0.085004221 | Actn3/Asb2 | 2 |
| GO:0021940 | BP | GO:0021940 | positive regulation of cerebellar granule cell precursor proliferation | 2/478 | 11/28943 | 0.013563741 | 0.104556018 | 0.085004221 | Zfp423/Shh | 2 |
| GO:0031630 | BP | GO:0031630 | regulation of synaptic vesicle fusion to presynaptic active zone membrane | 2/478 | 11/28943 | 0.013563741 | 0.104556018 | 0.085004221 | Syt9/Vamp1 | 2 |
| GO:0060174 | BP | GO:0060174 | limb bud formation | 2/478 | 11/28943 | 0.013563741 | 0.104556018 | 0.085004221 | Shh/Wnt3 | 2 |
| GO:0071481 | BP | GO:0071481 | cellular response to X-ray | 2/478 | 11/28943 | 0.013563741 | 0.104556018 | 0.085004221 | Gata3/Sfrp2 | 2 |
| GO:1900454 | BP | GO:1900454 | positive regulation of long-term synaptic depression | 2/478 | 11/28943 | 0.013563741 | 0.104556018 | 0.085004221 | Adcy8/Cbln1 | 2 |
| GO:1901632 | BP | GO:1901632 | regulation of synaptic vesicle membrane organization | 2/478 | 11/28943 | 0.013563741 | 0.104556018 | 0.085004221 | Syt9/Vamp1 | 2 |
| GO:1990504 | BP | GO:1990504 | dense core granule exocytosis | 2/478 | 11/28943 | 0.013563741 | 0.104556018 | 0.085004221 | Baiap3/Unc13c | 2 |
| GO:0002474 | BP | GO:0002474 | antigen processing and presentation of peptide antigen via MHC class I | 4/478 | 56/28943 | 0.013725293 | 0.104967483 | 0.085338742 | Tapbpl/H2-Q2/H2-T24/Clec4a2 | 4 |
| GO:0043507 | BP | GO:0043507 | positive regulation of JUN kinase activity | 4/478 | 56/28943 | 0.013725293 | 0.104967483 | 0.085338742 | Fzd10/Ror2/Edn1/Zeb2 | 4 |
| GO:0060337 | BP | GO:0060337 | type I interferon signaling pathway | 4/478 | 56/28943 | 0.013725293 | 0.104967483 | 0.085338742 | Samhd1/Stat1/Isg15/Usp29 | 4 |
| GO:0071357 | BP | GO:0071357 | cellular response to type I interferon | 4/478 | 56/28943 | 0.013725293 | 0.104967483 | 0.085338742 | Samhd1/Stat1/Isg15/Usp29 | 4 |
| GO:0051897 | BP | GO:0051897 | positive regulation of protein kinase B signaling | 6/478 | 118/28943 | 0.013748558 | 0.104967483 | 0.085338742 | Ret/Tcf7l2/Gata3/Angpt1/Ramp3/Nox4 | 6 |
| GO:0003151 | BP | GO:0003151 | outflow tract morphogenesis | 5/478 | 86/28943 | 0.014048063 | 0.10704946 | 0.087031393 | Pitx2/Sfrp2/Fzd1/Edn1/Ryr1 | 5 |
| GO:0009072 | BP | GO:0009072 | aromatic amino acid family metabolic process | 3/478 | 31/28943 | 0.014281126 | 0.107609777 | 0.087486931 | Pcbd1/Tyrp1/Ido2 | 3 |
| GO:0036314 | BP | GO:0036314 | response to sterol | 3/478 | 31/28943 | 0.014281126 | 0.107609777 | 0.087486931 | Gpld1/Rora/Inhba | 3 |
| GO:0042634 | BP | GO:0042634 | regulation of hair cycle | 3/478 | 31/28943 | 0.014281126 | 0.107609777 | 0.087486931 | Gal/Inhba/Fst | 3 |
| GO:0044062 | BP | GO:0044062 | regulation of excretion | 3/478 | 31/28943 | 0.014281126 | 0.107609777 | 0.087486931 | Npsr1/Agt/Edn1 | 3 |
| GO:0008585 | BP | GO:0008585 | female gonad development | 6/478 | 119/28943 | 0.014283291 | 0.107609777 | 0.087486931 | Angpt1/Agt/Nefh/Kitl/Inhba/Fst | 6 |
| GO:0045445 | BP | GO:0045445 | myoblast differentiation | 6/478 | 119/28943 | 0.014283291 | 0.107609777 | 0.087486931 | Cxcl10/Smyd1/Tcf7l2/Zfhx3/Shh/Cxcl9 | 6 |
| GO:0051090 | BP | GO:0051090 | regulation of DNA-binding transcription factor activity | 14/478 | 436/28943 | 0.014409796 | 0.108003515 | 0.087807041 | Adcy8/Foxa1/Trim40/Tcf7l2/Pou4f1/Eif2ak2/Trim30d/Fzd1/Trim21/Parp10/Shh/Sp100/Edn1/Wnt2 | 14 |
| GO:0043122 | BP | GO:0043122 | regulation of I-kappaB kinase/NF-kappaB signaling | 8/478 | 191/28943 | 0.014443746 | 0.108003515 | 0.087807041 | Angpt1/Rora/Trim30d/Hspb1/Stat1/Tnfsf10/Trim21/Clec4d | 8 |
| GO:0046631 | BP | GO:0046631 | alpha-beta T cell activation | 8/478 | 191/28943 | 0.014443746 | 0.108003515 | 0.087807041 | Gata3/Rsad2/Socs1/Rora/Lef1/Shh/Cd274/Clec4a2 | 8 |
| GO:0050731 | BP | GO:0050731 | positive regulation of peptidyl-tyrosine phosphorylation | 8/478 | 191/28943 | 0.014443746 | 0.108003515 | 0.087807041 | Angpt1/Agt/Parp14/Kitl/Parp9/Nox4/Ccl5/Itga5 | 8 |
| GO:0033059 | BP | GO:0033059 | cellular pigmentation | 4/478 | 57/28943 | 0.014573452 | 0.108566783 | 0.088264979 | Mreg/Tyrp1/Rab38/Zeb2 | 4 |
| GO:0044060 | BP | GO:0044060 | regulation of endocrine process | 4/478 | 57/28943 | 0.014573452 | 0.108566783 | 0.088264979 | Gal/Agt/F2r/Inhba | 4 |
| GO:0042326 | BP | GO:0042326 | negative regulation of phosphorylation | 13/478 | 394/28943 | 0.014695723 | 0.10911786 | 0.088713005 | Angpt1/Xdh/Agt/Socs1/Cnksr3/Actn3/Adarb1/Dbndd1/Parp14/Sfrp2/Hspb1/Grb10/Camk2n2 | 13 |
| GO:0048708 | BP | GO:0048708 | astrocyte differentiation | 5/478 | 87/28943 | 0.014708438 | 0.10911786 | 0.088713005 | Gap43/Agt/Tal1/Ror2/Shh | 5 |
| GO:0000082 | BP | GO:0000082 | G1/S transition of mitotic cell cycle | 9/478 | 230/28943 | 0.014729408 | 0.10911786 | 0.088713005 | Camk2d/Btn2a2/Cdk18/Esrrb/Stil/Usp29/Plk5/Inhba/Cdk17 | 9 |
| GO:0001837 | BP | GO:0001837 | epithelial to mesenchymal transition | 7/478 | 155/28943 | 0.014800801 | 0.1094437 | 0.088977914 | Foxa1/Tcf7l2/Gata3/Lef1/Sfrp2/Edn1/Wnt2 | 7 |
| GO:0051209 | BP | GO:0051209 | release of sequestered calcium ion into cytosol | 6/478 | 120/28943 | 0.014832337 | 0.10947416 | 0.089002678 | Cxcl10/Npsr1/Camk2d/F2r/Cxcl9/Ryr1 | 6 |
| GO:0051091 | BP | GO:0051091 | positive regulation of DNA-binding transcription factor activity | 10/478 | 271/28943 | 0.015232854 | 0.112222851 | 0.091237369 | Adcy8/Foxa1/Eif2ak2/Trim30d/Fzd1/Trim21/Shh/Sp100/Edn1/Wnt2 | 10 |
| GO:0030500 | BP | GO:0030500 | regulation of bone mineralization | 5/478 | 88/28943 | 0.015389292 | 0.112774045 | 0.09168549 | Fzd9/Actn3/Nell1/Fam20c/Isg15 | 5 |
| GO:0051283 | BP | GO:0051283 | negative regulation of sequestering of calcium ion | 6/478 | 121/28943 | 0.015395872 | 0.112774045 | 0.09168549 | Cxcl10/Npsr1/Camk2d/F2r/Cxcl9/Ryr1 | 6 |
| GO:0140353 | BP | GO:0140353 | lipid export from cell | 4/478 | 58/28943 | 0.015454041 | 0.112774045 | 0.09168549 | Gal/Agt/Inhba/Edn1 | 4 |
| GO:0051651 | BP | GO:0051651 | maintenance of location in cell | 9/478 | 232/28943 | 0.015500086 | 0.112774045 | 0.09168549 | Atp2a1/Cxcl10/Npsr1/Camk2d/Rit2/F2r/Sp100/Cxcl9/Ryr1 | 9 |
| GO:0023058 | BP | GO:0023058 | adaptation of signaling pathway | 3/478 | 32/28943 | 0.015569037 | 0.112774045 | 0.09168549 | Calca/Necab2/Arr3 | 3 |
| GO:0035162 | BP | GO:0035162 | embryonic hemopoiesis | 3/478 | 32/28943 | 0.015569037 | 0.112774045 | 0.09168549 | Gata3/Tal1/Kitl | 3 |
| GO:0060977 | BP | GO:0060977 | coronary vasculature morphogenesis | 3/478 | 32/28943 | 0.015569037 | 0.112774045 | 0.09168549 | Angpt1/Shh/Epor | 3 |
| GO:0070296 | BP | GO:0070296 | sarcoplasmic reticulum calcium ion transport | 3/478 | 32/28943 | 0.015569037 | 0.112774045 | 0.09168549 | Atp2a1/Camk2d/Ryr1 | 3 |
| GO:0070670 | BP | GO:0070670 | response to interleukin-4 | 3/478 | 32/28943 | 0.015569037 | 0.112774045 | 0.09168549 | Gata3/Lef1/Parp14 | 3 |
| GO:1903039 | BP | GO:1903039 | positive regulation of leukocyte cell-cell adhesion | 10/478 | 272/28943 | 0.015590101 | 0.112774045 | 0.09168549 | Gata3/Socs1/Lef1/Kitl/Btn2a2/Shh/Cd274/Ccl5/Il1rl2/H2-Ob | 10 |
| GO:0031644 | BP | GO:0031644 | regulation of nervous system process | 8/478 | 194/28943 | 0.015725178 | 0.11354545 | 0.092312644 | Tafa4/Cbln1/Oprm1/Chrna4/Agt/F2r/Grin2d/Edn1 | 8 |
| GO:0007160 | BP | GO:0007160 | cell-matrix adhesion | 9/478 | 233/28943 | 0.015896353 | 0.114574256 | 0.093149065 | L1cam/Agt/Actn3/Itga3/Plekha2/Itga7/Onecut2/Itga5/Itga8 | 9 |
| GO:0006022 | BP | GO:0006022 | aminoglycan metabolic process | 6/478 | 122/28943 | 0.015974071 | 0.114595719 | 0.093166514 | Has1/Angpt1/Itih3/Lyve1/B3gnt8/Has3 | 6 |
| GO:0046545 | BP | GO:0046545 | development of primary female sexual characteristics | 6/478 | 122/28943 | 0.015974071 | 0.114595719 | 0.093166514 | Angpt1/Agt/Nefh/Kitl/Inhba/Fst | 6 |
| GO:0010649 | BP | GO:0010649 | regulation of cell communication by electrical coupling | 2/478 | 12/28943 | 0.016100225 | 0.114595719 | 0.093166514 | Camk2d/Irx3 | 2 |
| GO:0014824 | BP | GO:0014824 | artery smooth muscle contraction | 2/478 | 12/28943 | 0.016100225 | 0.114595719 | 0.093166514 | Agt/Edn1 | 2 |
| GO:0051798 | BP | GO:0051798 | positive regulation of hair follicle development | 2/478 | 12/28943 | 0.016100225 | 0.114595719 | 0.093166514 | Gal/Fst | 2 |
| GO:0072497 | BP | GO:0072497 | mesenchymal stem cell differentiation | 2/478 | 12/28943 | 0.016100225 | 0.114595719 | 0.093166514 | Fzd1/Wnt3 | 2 |
| GO:2000551 | BP | GO:2000551 | regulation of T-helper 2 cell cytokine production | 2/478 | 12/28943 | 0.016100225 | 0.114595719 | 0.093166514 | Gata3/Rsad2 | 2 |
| GO:0007204 | BP | GO:0007204 | positive regulation of cytosolic calcium ion concentration | 9/478 | 234/28943 | 0.016300006 | 0.11567278 | 0.094042167 | Adcy8/Calca/Oprm1/Ccr10/Agt/F2r/Cckar/Epor/Edn1 | 9 |
| GO:0006898 | BP | GO:0006898 | receptor-mediated endocytosis | 10/478 | 274/28943 | 0.016323239 | 0.11567278 | 0.094042167 | Calca/Angpt1/Cubn/Necab2/Ramp3/Lyve1/Ache/Dnm3/Arr3/Gria2 | 10 |
| GO:0086001 | BP | GO:0086001 | cardiac muscle cell action potential | 4/478 | 59/28943 | 0.016367423 | 0.11567278 | 0.094042167 | Hcn4/Camk2d/Kcnj5/Hcn3 | 4 |
| GO:2001238 | BP | GO:2001238 | positive regulation of extrinsic apoptotic signaling pathway | 4/478 | 59/28943 | 0.016367423 | 0.11567278 | 0.094042167 | Ret/Agt/Tnfsf10/Inhba | 4 |
| GO:0051282 | BP | GO:0051282 | regulation of sequestering of calcium ion | 6/478 | 123/28943 | 0.016567105 | 0.116877122 | 0.095021299 | Cxcl10/Npsr1/Camk2d/F2r/Cxcl9/Ryr1 | 6 |
| GO:2001257 | BP | GO:2001257 | regulation of cation channel activity | 8/478 | 196/28943 | 0.016623929 | 0.117071162 | 0.095179054 | Hcn4/Oprm1/Chrna4/Gal/Kcnc2/Hcn3/Edn1/Lrrc26 | 8 |
| GO:0050890 | BP | GO:0050890 | cognition | 12/478 | 358/28943 | 0.016679783 | 0.117257703 | 0.095330712 | Adcy8/Gtf2a1l/Fzd9/Chrna4/Agt/Shc3/Itga3/Grm4/Foxb1/Itga5/Itga8/Ppp1r1b | 12 |
| GO:0003018 | BP | GO:0003018 | vascular process in circulatory system | 9/478 | 235/28943 | 0.01671112 | 0.117271536 | 0.095341958 | Calca/Angpt1/Agt/F2r/Akap12/Casr/Htr7/Mylk3/Edn1 | 9 |
| GO:0009187 | BP | GO:0009187 | cyclic nucleotide metabolic process | 3/478 | 33/28943 | 0.016920239 | 0.118530724 | 0.09636568 | Adcy8/Gucy2c/Rora | 3 |
| GO:0009952 | BP | GO:0009952 | anterior/posterior pattern specification | 9/478 | 236/28943 | 0.01712977 | 0.119578972 | 0.097217908 | Gbx2/Lef1/Ror2/Sfrp2/Shh/Foxb1/Wnt3/Wnt2/Zeb2 | 9 |
| GO:0051056 | BP | GO:0051056 | regulation of small GTPase mediated signal transduction | 9/478 | 236/28943 | 0.01712977 | 0.119578972 | 0.097217908 | Arhgap24/Camk2d/Rit2/F2r/Trim67/Itga3/Kitl/Timp2/Inf2 | 9 |
| GO:0006023 | BP | GO:0006023 | aminoglycan biosynthetic process | 4/478 | 60/28943 | 0.017313944 | 0.120533601 | 0.097994023 | Has1/Angpt1/B3gnt8/Has3 | 4 |
| GO:0010977 | BP | GO:0010977 | negative regulation of neuron projection development | 7/478 | 160/28943 | 0.017326894 | 0.120533601 | 0.097994023 | Dpysl3/Minar1/Rit2/Sema4g/Dnm3/Wnt3/Epha7 | 7 |
| GO:0060079 | BP | GO:0060079 | excitatory postsynaptic potential | 5/478 | 91/28943 | 0.017557201 | 0.121514115 | 0.098791182 | Cbln1/Chrna3/Oprm1/Chrna4/Grin2d | 5 |
| GO:0043405 | BP | GO:0043405 | regulation of MAP kinase activity | 8/478 | 198/28943 | 0.01755914 | 0.121514115 | 0.098791182 | Fzd10/Agt/Ror2/Sfrp2/Kitl/Nox4/Edn1/Zeb2 | 8 |
| GO:0098739 | BP | GO:0098739 | import across plasma membrane | 8/478 | 198/28943 | 0.01755914 | 0.121514115 | 0.098791182 | Hcn4/Slc7a3/Kcnj16/Agt/Slc22a4/Kcnj5/Kcnj12/Ramp3 | 8 |
| GO:0002040 | BP | GO:0002040 | sprouting angiogenesis | 6/478 | 125/28943 | 0.017798354 | 0.122321564 | 0.099447639 | Gpld1/Angpt1/Lef1/Rnf213/Shh/Itga5 | 6 |
| GO:0035710 | BP | GO:0035710 | CD4-positive, alpha-beta T cell activation | 6/478 | 125/28943 | 0.017798354 | 0.122321564 | 0.099447639 | Gata3/Rsad2/Socs1/Rora/Lef1/Cd274 | 6 |
| GO:0045582 | BP | GO:0045582 | positive regulation of T cell differentiation | 6/478 | 125/28943 | 0.017798354 | 0.122321564 | 0.099447639 | Gata3/Socs1/Lef1/Btn2a2/Shh/Il1rl2 | 6 |
| GO:0051208 | BP | GO:0051208 | sequestering of calcium ion | 6/478 | 125/28943 | 0.017798354 | 0.122321564 | 0.099447639 | Cxcl10/Npsr1/Camk2d/F2r/Cxcl9/Ryr1 | 6 |
| GO:0003205 | BP | GO:0003205 | cardiac chamber development | 8/478 | 199/28943 | 0.018040652 | 0.123773748 | 0.100628268 | Shox2/Pitx2/Gata3/Pou4f1/Sfrp2/Fzd1/Epor/Wnt2 | 8 |
| GO:0035050 | BP | GO:0035050 | embryonic heart tube development | 5/478 | 92/28943 | 0.018322411 | 0.124635714 | 0.101329047 | Pitx2/Asb2/Shh/Stil/Edn1 | 5 |
| GO:0002053 | BP | GO:0002053 | positive regulation of mesenchymal cell proliferation | 3/478 | 34/28943 | 0.018334981 | 0.124635714 | 0.101329047 | Shox2/Shh/Wnt2 | 3 |
| GO:0035929 | BP | GO:0035929 | steroid hormone secretion | 3/478 | 34/28943 | 0.018334981 | 0.124635714 | 0.101329047 | Gal/Agt/Inhba | 3 |
| GO:0036037 | BP | GO:0036037 | CD8-positive, alpha-beta T cell activation | 3/478 | 34/28943 | 0.018334981 | 0.124635714 | 0.101329047 | Socs1/Cd274/Clec4a2 | 3 |
| GO:0001764 | BP | GO:0001764 | neuron migration | 8/478 | 200/28943 | 0.018531558 | 0.124635714 | 0.101329047 | Pitx2/Ntng1/Gata3/Igsf10/Pou4f1/Itga3/Cckar/Robo3 | 8 |
| GO:0034284 | BP | GO:0034284 | response to monosaccharide | 8/478 | 200/28943 | 0.018531558 | 0.124635714 | 0.101329047 | Adcy8/Tcf7l2/Gpld1/Baiap3/Nnat/Nox4/Mafa/Runx2 | 8 |
| GO:0030900 | BP | GO:0030900 | forebrain development | 13/478 | 407/28943 | 0.018671964 | 0.124635714 | 0.101329047 | Pitx2/Tcf7l2/Pou4f1/Gbx2/Nhlh2/Fabp7/Lef1/Cckar/Shh/Foxb1/Stil/Inhba/Zeb2 | 13 |
| GO:0010739 | BP | GO:0010739 | positive regulation of protein kinase A signaling | 2/478 | 13/28943 | 0.018821772 | 0.124635714 | 0.101329047 | Akap12/Ramp3 | 2 |
| GO:0030949 | BP | GO:0030949 | positive regulation of vascular endothelial growth factor receptor signaling pathway | 2/478 | 13/28943 | 0.018821772 | 0.124635714 | 0.101329047 | Angpt1/Grb10 | 2 |
| GO:0032754 | BP | GO:0032754 | positive regulation of interleukin-5 production | 2/478 | 13/28943 | 0.018821772 | 0.124635714 | 0.101329047 | Gata3/Il17rb | 2 |
| GO:0033689 | BP | GO:0033689 | negative regulation of osteoblast proliferation | 2/478 | 13/28943 | 0.018821772 | 0.124635714 | 0.101329047 | Eif2ak2/Nell1 | 2 |
| GO:0035810 | BP | GO:0035810 | positive regulation of urine volume | 2/478 | 13/28943 | 0.018821772 | 0.124635714 | 0.101329047 | Tfap2b/Edn1 | 2 |
| GO:0042532 | BP | GO:0042532 | negative regulation of tyrosine phosphorylation of STAT protein | 2/478 | 13/28943 | 0.018821772 | 0.124635714 | 0.101329047 | Socs1/Parp14 | 2 |
| GO:0048070 | BP | GO:0048070 | regulation of developmental pigmentation | 2/478 | 13/28943 | 0.018821772 | 0.124635714 | 0.101329047 | Kitl/Zeb2 | 2 |
| GO:0048742 | BP | GO:0048742 | regulation of skeletal muscle fiber development | 2/478 | 13/28943 | 0.018821772 | 0.124635714 | 0.101329047 | Shox2/Actn3 | 2 |
| GO:0070471 | BP | GO:0070471 | uterine smooth muscle contraction | 2/478 | 13/28943 | 0.018821772 | 0.124635714 | 0.101329047 | Tacr3/Agt | 2 |
| GO:0086015 | BP | GO:0086015 | SA node cell action potential | 2/478 | 13/28943 | 0.018821772 | 0.124635714 | 0.101329047 | Hcn4/Hcn3 | 2 |
| GO:0086018 | BP | GO:0086018 | SA node cell to atrial cardiac muscle cell signaling | 2/478 | 13/28943 | 0.018821772 | 0.124635714 | 0.101329047 | Hcn4/Hcn3 | 2 |
| GO:0086070 | BP | GO:0086070 | SA node cell to atrial cardiac muscle cell communication | 2/478 | 13/28943 | 0.018821772 | 0.124635714 | 0.101329047 | Hcn4/Hcn3 | 2 |
| GO:0097709 | BP | GO:0097709 | connective tissue replacement | 2/478 | 13/28943 | 0.018821772 | 0.124635714 | 0.101329047 | F2r/Timp1 | 2 |
| GO:0120305 | BP | GO:0120305 | regulation of pigmentation | 2/478 | 13/28943 | 0.018821772 | 0.124635714 | 0.101329047 | Kitl/Zeb2 | 2 |
| GO:0051101 | BP | GO:0051101 | regulation of DNA binding | 6/478 | 127/28943 | 0.019090938 | 0.126121303 | 0.102536834 | Pitx2/Gata3/Pou4f1/Lef1/Sp100/Nek2 | 6 |
| GO:0043367 | BP | GO:0043367 | CD4-positive, alpha-beta T cell differentiation | 5/478 | 93/28943 | 0.019109288 | 0.126121303 | 0.102536834 | Gata3/Rsad2/Socs1/Rora/Lef1 | 5 |
| GO:0010676 | BP | GO:0010676 | positive regulation of cellular carbohydrate metabolic process | 4/478 | 62/28943 | 0.019307693 | 0.126796672 | 0.10308591 | Tcf7l2/Gpld1/Actn3/Esrrb | 4 |
| GO:0021872 | BP | GO:0021872 | forebrain generation of neurons | 4/478 | 62/28943 | 0.019307693 | 0.126796672 | 0.10308591 | Gbx2/Nhlh2/Lef1/Inhba | 4 |
| GO:0051058 | BP | GO:0051058 | negative regulation of small GTPase mediated signal transduction | 4/478 | 62/28943 | 0.019307693 | 0.126796672 | 0.10308591 | Arhgap24/Trim67/Itga3/Timp2 | 4 |
| GO:0008406 | BP | GO:0008406 | gonad development | 9/478 | 241/28943 | 0.019338636 | 0.126796672 | 0.10308591 | Gata3/Angpt1/Nhlh2/Agt/Nefh/Sfrp2/Kitl/Inhba/Fst | 9 |
| GO:2001236 | BP | GO:2001236 | regulation of extrinsic apoptotic signaling pathway | 7/478 | 164/28943 | 0.019555668 | 0.128009479 | 0.104071924 | Ret/Agt/Sfrp2/Tnfsf10/Eya2/Sp100/Inhba | 7 |
| GO:0019882 | BP | GO:0019882 | antigen processing and presentation | 6/478 | 128/28943 | 0.019760631 | 0.128433597 | 0.104416732 | Rab3c/Tapbpl/H2-Q2/H2-T24/Clec4a2/H2-Ob | 6 |
| GO:0002063 | BP | GO:0002063 | chondrocyte development | 3/478 | 35/28943 | 0.019813447 | 0.128433597 | 0.104416732 | Shox2/Sfrp2/Runx2 | 3 |
| GO:0003209 | BP | GO:0003209 | cardiac atrium morphogenesis | 3/478 | 35/28943 | 0.019813447 | 0.128433597 | 0.104416732 | Shox2/Pitx2/Wnt2 | 3 |
| GO:0035116 | BP | GO:0035116 | embryonic hindlimb morphogenesis | 3/478 | 35/28943 | 0.019813447 | 0.128433597 | 0.104416732 | Pitx2/Shh/Wnt3 | 3 |
| GO:0045987 | BP | GO:0045987 | positive regulation of smooth muscle contraction | 3/478 | 35/28943 | 0.019813447 | 0.128433597 | 0.104416732 | Tacr3/F2r/Edn1 | 3 |
| GO:0060142 | BP | GO:0060142 | regulation of syncytium formation by plasma membrane fusion | 3/478 | 35/28943 | 0.019813447 | 0.128433597 | 0.104416732 | Cxcl10/Stat1/Cxcl9 | 3 |
| GO:0070588 | BP | GO:0070588 | calcium ion transmembrane transport | 11/478 | 325/28943 | 0.020053364 | 0.129621055 | 0.105382138 | Atp2a1/Calca/Cxcl10/Npsr1/Camk2d/F2r/Grin2d/Ramp3/Cxcl9/Edn1/Ryr1 | 11 |
| GO:0046578 | BP | GO:0046578 | regulation of Ras protein signal transduction | 8/478 | 203/28943 | 0.020061561 | 0.129621055 | 0.105382138 | Arhgap24/Camk2d/Rit2/F2r/Trim67/Itga3/Kitl/Timp2 | 8 |
| GO:0006820 | BP | GO:0006820 | anion transport | 15/478 | 500/28943 | 0.020110234 | 0.129725628 | 0.105467156 | Slc17a6/Slc7a3/Glra3/Slc6a11/Gabrq/Agt/Ano5/Proca1/Prkg2/Casr/Slc7a13/Clcn5/Edn1/Slc26a10/Slc2a9 | 15 |
| GO:0097529 | BP | GO:0097529 | myeloid leukocyte migration | 9/478 | 243/28943 | 0.020277497 | 0.13059362 | 0.106172835 | Calca/Tafa4/Cxcl10/Vav3/Ror2/Kitl/Cxcl9/Edn1/Ccl5 | 9 |
| GO:0001736 | BP | GO:0001736 | establishment of planar polarity | 4/478 | 63/28943 | 0.020355517 | 0.130674567 | 0.106238645 | Wnt9b/Ror2/Sfrp2/Fzd1 | 4 |
| GO:0070098 | BP | GO:0070098 | chemokine-mediated signaling pathway | 4/478 | 63/28943 | 0.020355517 | 0.130674567 | 0.106238645 | Cxcl10/Cxcl9/Edn1/Ccl5 | 4 |
| GO:0046632 | BP | GO:0046632 | alpha-beta T cell differentiation | 6/478 | 129/28943 | 0.020446131 | 0.130911717 | 0.106431449 | Gata3/Rsad2/Socs1/Rora/Lef1/Shh | 6 |
| GO:0030217 | BP | GO:0030217 | T cell differentiation | 11/478 | 326/28943 | 0.020458029 | 0.130911717 | 0.106431449 | Gata3/Rsad2/Socs1/Rora/Lef1/Hspb1/Btn2a2/Shh/Runx2/Il1rl2/Clec4d | 11 |
| GO:0071902 | BP | GO:0071902 | positive regulation of protein serine/threonine kinase activity | 8/478 | 204/28943 | 0.020590956 | 0.131551503 | 0.106951595 | Fzd10/Agt/Ror2/Kitl/Stil/Nox4/Edn1/Zeb2 | 8 |
| GO:0043406 | BP | GO:0043406 | positive regulation of MAP kinase activity | 6/478 | 130/28943 | 0.02114759 | 0.133232511 | 0.108318258 | Fzd10/Ror2/Kitl/Nox4/Edn1/Zeb2 | 6 |
| GO:0051592 | BP | GO:0051592 | response to calcium ion | 6/478 | 130/28943 | 0.02114759 | 0.133232511 | 0.108318258 | Adcy8/Gpld1/Syt9/Casr/Krt10/Kcnh1 | 6 |
| GO:0045137 | BP | GO:0045137 | development of primary sexual characteristics | 9/478 | 245/28943 | 0.021248826 | 0.133232511 | 0.108318258 | Gata3/Angpt1/Nhlh2/Agt/Nefh/Sfrp2/Kitl/Inhba/Fst | 9 |
| GO:0010675 | BP | GO:0010675 | regulation of cellular carbohydrate metabolic process | 7/478 | 167/28943 | 0.021353537 | 0.133232511 | 0.108318258 | Tcf7l2/Gpld1/Rora/Actn3/Grb10/Esrrb/Igfbp4 | 7 |
| GO:0006471 | BP | GO:0006471 | protein ADP-ribosylation | 3/478 | 36/28943 | 0.021355752 | 0.133232511 | 0.108318258 | Parp14/Parp10/Parp9 | 3 |
| GO:0010719 | BP | GO:0010719 | negative regulation of epithelial to mesenchymal transition | 3/478 | 36/28943 | 0.021355752 | 0.133232511 | 0.108318258 | Foxa1/Gata3/Sfrp2 | 3 |
| GO:0048665 | BP | GO:0048665 | neuron fate specification | 3/478 | 36/28943 | 0.021355752 | 0.133232511 | 0.108318258 | Foxa1/Pou4f1/Shh | 3 |
| GO:0090183 | BP | GO:0090183 | regulation of kidney development | 3/478 | 36/28943 | 0.021355752 | 0.133232511 | 0.108318258 | Ret/Gata3/Agt | 3 |
| GO:0007164 | BP | GO:0007164 | establishment of tissue polarity | 4/478 | 64/28943 | 0.021437675 | 0.133232511 | 0.108318258 | Wnt9b/Ror2/Sfrp2/Fzd1 | 4 |
| GO:0014911 | BP | GO:0014911 | positive regulation of smooth muscle cell migration | 4/478 | 64/28943 | 0.021437675 | 0.133232511 | 0.108318258 | Camk2d/Agt/Nox4/Ccl5 | 4 |
| GO:0010717 | BP | GO:0010717 | regulation of epithelial to mesenchymal transition | 5/478 | 96/28943 | 0.021602063 | 0.133232511 | 0.108318258 | Foxa1/Tcf7l2/Gata3/Lef1/Sfrp2 | 5 |
| GO:0009071 | BP | GO:0009071 | serine family amino acid catabolic process | 2/478 | 14/28943 | 0.021721604 | 0.133232511 | 0.108318258 | Dao/Sdsl | 2 |
| GO:0014820 | BP | GO:0014820 | tonic smooth muscle contraction | 2/478 | 14/28943 | 0.021721604 | 0.133232511 | 0.108318258 | Agt/Edn1 | 2 |
| GO:0021903 | BP | GO:0021903 | rostrocaudal neural tube patterning | 2/478 | 14/28943 | 0.021721604 | 0.133232511 | 0.108318258 | Gbx2/Shh | 2 |
| GO:0021936 | BP | GO:0021936 | regulation of cerebellar granule cell precursor proliferation | 2/478 | 14/28943 | 0.021721604 | 0.133232511 | 0.108318258 | Zfp423/Shh | 2 |
| GO:0042983 | BP | GO:0042983 | amyloid precursor protein biosynthetic process | 2/478 | 14/28943 | 0.021721604 | 0.133232511 | 0.108318258 | Necab1/Necab2 | 2 |
| GO:0042984 | BP | GO:0042984 | regulation of amyloid precursor protein biosynthetic process | 2/478 | 14/28943 | 0.021721604 | 0.133232511 | 0.108318258 | Necab1/Necab2 | 2 |
| GO:0045793 | BP | GO:0045793 | positive regulation of cell size | 2/478 | 14/28943 | 0.021721604 | 0.133232511 | 0.108318258 | Ret/Edn1 | 2 |
| GO:0045989 | BP | GO:0045989 | positive regulation of striated muscle contraction | 2/478 | 14/28943 | 0.021721604 | 0.133232511 | 0.108318258 | Atp2a1/Actn3 | 2 |
| GO:0061309 | BP | GO:0061309 | cardiac neural crest cell development involved in outflow tract morphogenesis | 2/478 | 14/28943 | 0.021721604 | 0.133232511 | 0.108318258 | Pitx2/Edn1 | 2 |
| GO:0072044 | BP | GO:0072044 | collecting duct development | 2/478 | 14/28943 | 0.021721604 | 0.133232511 | 0.108318258 | Wnt9b/Tfap2b | 2 |
| GO:0072172 | BP | GO:0072172 | mesonephric tubule formation | 2/478 | 14/28943 | 0.021721604 | 0.133232511 | 0.108318258 | Gata3/Wnt9b | 2 |
| GO:0090179 | BP | GO:0090179 | planar cell polarity pathway involved in neural tube closure | 2/478 | 14/28943 | 0.021721604 | 0.133232511 | 0.108318258 | Sfrp2/Fzd1 | 2 |
| GO:0106072 | BP | GO:0106072 | negative regulation of adenylate cyclase-activating G protein-coupled receptor signaling pathway | 2/478 | 14/28943 | 0.021721604 | 0.133232511 | 0.108318258 | Oprm1/Mrap2 | 2 |
| GO:1905809 | BP | GO:1905809 | negative regulation of synapse organization | 2/478 | 14/28943 | 0.021721604 | 0.133232511 | 0.108318258 | Cbln1/Epha7 | 2 |
| GO:2001241 | BP | GO:2001241 | positive regulation of extrinsic apoptotic signaling pathway in absence of ligand | 2/478 | 14/28943 | 0.021721604 | 0.133232511 | 0.108318258 | Ret/Inhba | 2 |
| GO:0030282 | BP | GO:0030282 | bone mineralization | 6/478 | 131/28943 | 0.021865157 | 0.133907316 | 0.108866876 | Fzd9/Tcf7l2/Actn3/Nell1/Fam20c/Isg15 | 6 |
| GO:0007519 | BP | GO:0007519 | skeletal muscle tissue development | 8/478 | 207/28943 | 0.022238566 | 0.135985599 | 0.110556523 | Shox2/Smyd1/Pitx2/Tcf7l2/Actn3/Asb2/Shh/Ryr1 | 8 |
| GO:0046677 | BP | GO:0046677 | response to antibiotic | 3/478 | 37/28943 | 0.022961946 | 0.139570948 | 0.113471418 | Ache/Rsrc1/Ciita | 3 |
| GO:0060441 | BP | GO:0060441 | epithelial tube branching involved in lung morphogenesis | 3/478 | 37/28943 | 0.022961946 | 0.139570948 | 0.113471418 | Foxa1/Shh/Wnt2 | 3 |
| GO:0090075 | BP | GO:0090075 | relaxation of muscle | 3/478 | 37/28943 | 0.022961946 | 0.139570948 | 0.113471418 | Atp2a1/Camk2d/Actn3 | 3 |
| GO:0048872 | BP | GO:0048872 | homeostasis of number of cells | 12/478 | 375/28943 | 0.022964716 | 0.139570948 | 0.113471418 | Gata3/F2r/Tal1/Stat1/Kitl/Tex15/Ank1/Isg15/Inhba/Alas2/Hba-a2/Hba-a1 | 12 |
| GO:0071248 | BP | GO:0071248 | cellular response to metal ion | 7/478 | 170/28943 | 0.023263068 | 0.141169347 | 0.11477092 | Adcy8/Glra3/Gpld1/Syt9/Shh/Krt10/Kcnh1 | 7 |
| GO:0050772 | BP | GO:0050772 | positive regulation of axonogenesis | 5/478 | 98/28943 | 0.023376055 | 0.141425135 | 0.114978875 | Shox2/L1cam/Ache/Wnt3/Zeb2 | 5 |
| GO:1903321 | BP | GO:1903321 | negative regulation of protein modification by small protein conjugation or removal | 5/478 | 98/28943 | 0.023376055 | 0.141425135 | 0.114978875 | Dtx3l/Minar1/Trim21/Parp10/Isg15 | 5 |
| GO:0060688 | BP | GO:0060688 | regulation of morphogenesis of a branching structure | 4/478 | 66/28943 | 0.023705981 | 0.143204211 | 0.116425267 | Shox2/Agt/Shh/Wnt2 | 4 |
| GO:0006814 | BP | GO:0006814 | sodium ion transport | 9/478 | 250/28943 | 0.023822867 | 0.143692913 | 0.116822583 | Hcn4/Slc17a6/Slc6a11/Camk2d/Slc22a4/Gm13629/Cnksr3/Hcn3/Edn1 | 9 |
| GO:0006887 | BP | GO:0006887 | exocytosis | 13/478 | 422/28943 | 0.024211915 | 0.14431328 | 0.117326942 | Grin3a/Chrna3/Glra3/Chrna4/Syt9/Rab3c/Chrnb3/Baiap3/Unc13c/Grm4/Vamp1/Ccl5/Kcnh1 | 13 |
| GO:0046661 | BP | GO:0046661 | male sex differentiation | 7/478 | 172/28943 | 0.024599574 | 0.14431328 | 0.117326942 | Gata3/Nhlh2/Wnt9b/Sfrp2/Tex15/Shh/Inhba | 7 |
| GO:0032412 | BP | GO:0032412 | regulation of ion transmembrane transporter activity | 10/478 | 293/28943 | 0.024615134 | 0.14431328 | 0.117326942 | Hcn4/Oprm1/Chrna4/Camk2d/Gal/Cnksr3/Kcnc2/Hcn3/Edn1/Lrrc26 | 10 |
| GO:0031281 | BP | GO:0031281 | positive regulation of cyclase activity | 3/478 | 38/28943 | 0.024632021 | 0.14431328 | 0.117326942 | Vipr2/Calca/Timp2 | 3 |
| GO:0032438 | BP | GO:0032438 | melanosome organization | 3/478 | 38/28943 | 0.024632021 | 0.14431328 | 0.117326942 | Tyrp1/Rab38/Zeb2 | 3 |
| GO:0051482 | BP | GO:0051482 | positive regulation of cytosolic calcium ion concentration involved in phospholipase C-activating G protein-coupled signaling pathway | 3/478 | 38/28943 | 0.024632021 | 0.14431328 | 0.117326942 | Calca/F2r/Edn1 | 3 |
| GO:1905606 | BP | GO:1905606 | regulation of presynapse assembly | 3/478 | 38/28943 | 0.024632021 | 0.14431328 | 0.117326942 | Cbln1/Slitrk6/Fzd1 | 3 |
| GO:0002396 | BP | GO:0002396 | MHC protein complex assembly | 2/478 | 15/28943 | 0.024793116 | 0.14431328 | 0.117326942 | Tapbpl/H2-Ob | 2 |
| GO:0002501 | BP | GO:0002501 | peptide antigen assembly with MHC protein complex | 2/478 | 15/28943 | 0.024793116 | 0.14431328 | 0.117326942 | Tapbpl/H2-Ob | 2 |
| GO:0009155 | BP | GO:0009155 | purine deoxyribonucleotide catabolic process | 2/478 | 15/28943 | 0.024793116 | 0.14431328 | 0.117326942 | Xdh/Samhd1 | 2 |
| GO:0010172 | BP | GO:0010172 | embryonic body morphogenesis | 2/478 | 15/28943 | 0.024793116 | 0.14431328 | 0.117326942 | Mab21l2/Grem2 | 2 |
| GO:0014733 | BP | GO:0014733 | regulation of skeletal muscle adaptation | 2/478 | 15/28943 | 0.024793116 | 0.14431328 | 0.117326942 | Tnnt1/Actn3 | 2 |
| GO:0014819 | BP | GO:0014819 | regulation of skeletal muscle contraction | 2/478 | 15/28943 | 0.024793116 | 0.14431328 | 0.117326942 | Atp2a1/Actn3 | 2 |
| GO:0030213 | BP | GO:0030213 | hyaluronan biosynthetic process | 2/478 | 15/28943 | 0.024793116 | 0.14431328 | 0.117326942 | Has1/Has3 | 2 |
| GO:0032736 | BP | GO:0032736 | positive regulation of interleukin-13 production | 2/478 | 15/28943 | 0.024793116 | 0.14431328 | 0.117326942 | Gata3/Il17rb | 2 |
| GO:0032897 | BP | GO:0032897 | negative regulation of viral transcription | 2/478 | 15/28943 | 0.024793116 | 0.14431328 | 0.117326942 | Trim21/Sp100 | 2 |
| GO:0035815 | BP | GO:0035815 | positive regulation of renal sodium excretion | 2/478 | 15/28943 | 0.024793116 | 0.14431328 | 0.117326942 | Agt/Edn1 | 2 |
| GO:0042976 | BP | GO:0042976 | activation of Janus kinase activity | 2/478 | 15/28943 | 0.024793116 | 0.14431328 | 0.117326942 | Agt/Socs1 | 2 |
| GO:0043455 | BP | GO:0043455 | regulation of secondary metabolic process | 2/478 | 15/28943 | 0.024793116 | 0.14431328 | 0.117326942 | Tyrp1/Zeb2 | 2 |
| GO:0048021 | BP | GO:0048021 | regulation of melanin biosynthetic process | 2/478 | 15/28943 | 0.024793116 | 0.14431328 | 0.117326942 | Tyrp1/Zeb2 | 2 |
| GO:0048755 | BP | GO:0048755 | branching morphogenesis of a nerve | 2/478 | 15/28943 | 0.024793116 | 0.14431328 | 0.117326942 | Shox2/Epha7 | 2 |
| GO:0060700 | BP | GO:0060700 | regulation of ribonuclease activity | 2/478 | 15/28943 | 0.024793116 | 0.14431328 | 0.117326942 | Oasl1/Oasl2 | 2 |
| GO:0090178 | BP | GO:0090178 | regulation of establishment of planar polarity involved in neural tube closure | 2/478 | 15/28943 | 0.024793116 | 0.14431328 | 0.117326942 | Sfrp2/Fzd1 | 2 |
| GO:1900376 | BP | GO:1900376 | regulation of secondary metabolite biosynthetic process | 2/478 | 15/28943 | 0.024793116 | 0.14431328 | 0.117326942 | Tyrp1/Zeb2 | 2 |
| GO:0032387 | BP | GO:0032387 | negative regulation of intracellular transport | 4/478 | 67/28943 | 0.024892578 | 0.144681315 | 0.117626155 | Siah3/Angpt1/Derl3/Sp100 | 4 |
| GO:0035150 | BP | GO:0035150 | regulation of tube size | 7/478 | 174/28943 | 0.025987846 | 0.150827716 | 0.12262319 | Calca/Agt/F2r/Wnt9b/Casr/Htr7/Edn1 | 7 |
| GO:0006801 | BP | GO:0006801 | superoxide metabolic process | 4/478 | 68/28943 | 0.026114405 | 0.151342263 | 0.123041517 | Tafa4/Agt/Nox4/Edn1 | 4 |
| GO:0010038 | BP | GO:0010038 | response to metal ion | 10/478 | 296/28943 | 0.026159168 | 0.151381966 | 0.123073796 | Adcy8/Glra3/Gpld1/Xdh/Syt9/Casr/Shh/Fibin/Krt10/Kcnh1 | 10 |
| GO:0042832 | BP | GO:0042832 | defense response to protozoan | 3/478 | 39/28943 | 0.026365908 | 0.151480676 | 0.123154047 | Batf2/Gbp6/Irgm2 | 3 |
| GO:0045589 | BP | GO:0045589 | regulation of regulatory T cell differentiation | 3/478 | 39/28943 | 0.026365908 | 0.151480676 | 0.123154047 | Socs1/Hspb1/Btn2a2 | 3 |
| GO:0048753 | BP | GO:0048753 | pigment granule organization | 3/478 | 39/28943 | 0.026365908 | 0.151480676 | 0.123154047 | Tyrp1/Rab38/Zeb2 | 3 |
| GO:0051349 | BP | GO:0051349 | positive regulation of lyase activity | 3/478 | 39/28943 | 0.026365908 | 0.151480676 | 0.123154047 | Vipr2/Calca/Timp2 | 3 |
| GO:0086091 | BP | GO:0086091 | regulation of heart rate by cardiac conduction | 3/478 | 39/28943 | 0.026365908 | 0.151480676 | 0.123154047 | Hcn4/Kcnj5/Hcn3 | 3 |
| GO:0009743 | BP | GO:0009743 | response to carbohydrate | 8/478 | 214/28943 | 0.026440561 | 0.151691324 | 0.123325305 | Adcy8/Tcf7l2/Gpld1/Baiap3/Nnat/Nox4/Mafa/Runx2 | 8 |
| GO:0031032 | BP | GO:0031032 | actomyosin structure organization | 8/478 | 215/28943 | 0.027082918 | 0.155153644 | 0.126140177 | Tnnt1/Kank4/Fhdc1/Cit/Nox4/Mylk3/Edn1/Tmod1 | 8 |
| GO:0099565 | BP | GO:0099565 | chemical synaptic transmission, postsynaptic | 5/478 | 102/28943 | 0.027199828 | 0.155600164 | 0.126503198 | Cbln1/Chrna3/Oprm1/Chrna4/Grin2d | 5 |
| GO:0060425 | BP | GO:0060425 | lung morphogenesis | 4/478 | 69/28943 | 0.027371641 | 0.156359033 | 0.12712016 | Foxa1/Pitx2/Shh/Wnt2 | 4 |
| GO:0044843 | BP | GO:0044843 | cell cycle G1/S phase transition | 9/478 | 257/28943 | 0.027789477 | 0.156471252 | 0.127211394 | Camk2d/Btn2a2/Cdk18/Esrrb/Stil/Usp29/Plk5/Inhba/Cdk17 | 9 |
| GO:0009111 | BP | GO:0009111 | vitamin catabolic process | 2/478 | 16/28943 | 0.02802987 | 0.156471252 | 0.127211394 | Cubn/Crabp1 | 2 |
| GO:0010819 | BP | GO:0010819 | regulation of T cell chemotaxis | 2/478 | 16/28943 | 0.02802987 | 0.156471252 | 0.127211394 | Cxcl10/Ccl5 | 2 |
| GO:0014857 | BP | GO:0014857 | regulation of skeletal muscle cell proliferation | 2/478 | 16/28943 | 0.02802987 | 0.156471252 | 0.127211394 | Angpt1/Shh | 2 |
| GO:0016264 | BP | GO:0016264 | gap junction assembly | 2/478 | 16/28943 | 0.02802987 | 0.156471252 | 0.127211394 | Irx3/Agt | 2 |
| GO:0042454 | BP | GO:0042454 | ribonucleoside catabolic process | 2/478 | 16/28943 | 0.02802987 | 0.156471252 | 0.127211394 | Xdh/Cda | 2 |
| GO:0042541 | BP | GO:0042541 | hemoglobin biosynthetic process | 2/478 | 16/28943 | 0.02802987 | 0.156471252 | 0.127211394 | Inhba/Alas2 | 2 |
| GO:0045651 | BP | GO:0045651 | positive regulation of macrophage differentiation | 2/478 | 16/28943 | 0.02802987 | 0.156471252 | 0.127211394 | Calca/Ror2 | 2 |
| GO:0046007 | BP | GO:0046007 | negative regulation of activated T cell proliferation | 2/478 | 16/28943 | 0.02802987 | 0.156471252 | 0.127211394 | Btn2a2/Cd274 | 2 |
| GO:0070234 | BP | GO:0070234 | positive regulation of T cell apoptotic process | 2/478 | 16/28943 | 0.02802987 | 0.156471252 | 0.127211394 | Cd274/Ccl5 | 2 |
| GO:0086103 | BP | GO:0086103 | G protein-coupled receptor signaling pathway involved in heart process | 2/478 | 16/28943 | 0.02802987 | 0.156471252 | 0.127211394 | Ramp3/Edn1 | 2 |
| GO:0090177 | BP | GO:0090177 | establishment of planar polarity involved in neural tube closure | 2/478 | 16/28943 | 0.02802987 | 0.156471252 | 0.127211394 | Sfrp2/Fzd1 | 2 |
| GO:1903818 | BP | GO:1903818 | positive regulation of voltage-gated potassium channel activity | 2/478 | 16/28943 | 0.02802987 | 0.156471252 | 0.127211394 | Kcnc2/Lrrc26 | 2 |
| GO:2000035 | BP | GO:2000035 | regulation of stem cell division | 2/478 | 16/28943 | 0.02802987 | 0.156471252 | 0.127211394 | Sfrp2/Esrrb | 2 |
| GO:2001212 | BP | GO:2001212 | regulation of vasculogenesis | 2/478 | 16/28943 | 0.02802987 | 0.156471252 | 0.127211394 | Xdh/Asb4 | 2 |
| GO:0001881 | BP | GO:0001881 | receptor recycling | 3/478 | 40/28943 | 0.028163484 | 0.156471252 | 0.127211394 | Ramp3/Ache/Gria2 | 3 |
| GO:0071425 | BP | GO:0071425 | hematopoietic stem cell proliferation | 3/478 | 40/28943 | 0.028163484 | 0.156471252 | 0.127211394 | Eif2ak2/Sfrp2/Kitl | 3 |
| GO:1904707 | BP | GO:1904707 | positive regulation of vascular associated smooth muscle cell proliferation | 3/478 | 40/28943 | 0.028163484 | 0.156471252 | 0.127211394 | Camk2d/Agt/Edn1 | 3 |
| GO:0021510 | BP | GO:0021510 | spinal cord development | 5/478 | 103/28943 | 0.0282142 | 0.156471252 | 0.127211394 | Tal1/Adarb1/Pbx3/Shh/Foxb1 | 5 |
| GO:0030593 | BP | GO:0030593 | neutrophil chemotaxis | 5/478 | 103/28943 | 0.0282142 | 0.156471252 | 0.127211394 | Cxcl10/Vav3/Cxcl9/Edn1/Ccl5 | 5 |
| GO:0050795 | BP | GO:0050795 | regulation of behavior | 5/478 | 103/28943 | 0.0282142 | 0.156471252 | 0.127211394 | Cntnap4/Tacr3/Npsr1/Zfhx3/Baiap3 | 5 |
| GO:0098742 | BP | GO:0098742 | cell-cell adhesion via plasma-membrane adhesion molecules | 8/478 | 217/28943 | 0.028399971 | 0.157283057 | 0.127871393 | Ret/Ntng1/Cbln1/L1cam/Cdh20/Crb1/Pcdh18/Itga5 | 8 |
| GO:0042509 | BP | GO:0042509 | regulation of tyrosine phosphorylation of STAT protein | 4/478 | 70/28943 | 0.028664448 | 0.158527895 | 0.128883448 | Socs1/Parp14/Parp9/Ccl5 | 4 |
| GO:0045621 | BP | GO:0045621 | positive regulation of lymphocyte differentiation | 6/478 | 140/28943 | 0.029071012 | 0.160554014 | 0.130530687 | Gata3/Socs1/Lef1/Btn2a2/Shh/Il1rl2 | 6 |
| GO:0060538 | BP | GO:0060538 | skeletal muscle organ development | 8/478 | 219/28943 | 0.029760648 | 0.1640327 | 0.133358864 | Shox2/Smyd1/Pitx2/Tcf7l2/Actn3/Asb2/Shh/Ryr1 | 8 |
| GO:0001933 | BP | GO:0001933 | negative regulation of protein phosphorylation | 11/478 | 346/28943 | 0.029872501 | 0.1640327 | 0.133358864 | Angpt1/Xdh/Agt/Socs1/Cnksr3/Adarb1/Dbndd1/Parp14/Sfrp2/Hspb1/Camk2n2 | 11 |
| GO:0060249 | BP | GO:0060249 | anatomical structure homeostasis | 11/478 | 346/28943 | 0.029872501 | 0.1640327 | 0.133358864 | Calca/Angpt1/Calb2/F2r/Cracd/Crb1/Tex15/Esrrb/Nox4/Col11a2/Kcnh1 | 11 |
| GO:0030239 | BP | GO:0030239 | myofibril assembly | 4/478 | 71/28943 | 0.029992967 | 0.1640327 | 0.133358864 | Tnnt1/Mylk3/Edn1/Tmod1 | 4 |
| GO:0060986 | BP | GO:0060986 | endocrine hormone secretion | 4/478 | 71/28943 | 0.029992967 | 0.1640327 | 0.133358864 | Gata3/Gal/Agt/Inhba | 4 |
| GO:0003230 | BP | GO:0003230 | cardiac atrium development | 3/478 | 41/28943 | 0.030024573 | 0.1640327 | 0.133358864 | Shox2/Pitx2/Wnt2 | 3 |
| GO:0010613 | BP | GO:0010613 | positive regulation of cardiac muscle hypertrophy | 3/478 | 41/28943 | 0.030024573 | 0.1640327 | 0.133358864 | Camk2d/Agt/Edn1 | 3 |
| GO:0022898 | BP | GO:0022898 | regulation of transmembrane transporter activity | 10/478 | 303/28943 | 0.030029528 | 0.1640327 | 0.133358864 | Hcn4/Oprm1/Chrna4/Camk2d/Gal/Cnksr3/Kcnc2/Hcn3/Edn1/Lrrc26 | 10 |
| GO:0010466 | BP | GO:0010466 | negative regulation of peptidase activity | 9/478 | 262/28943 | 0.030892966 | 0.167981801 | 0.13656949 | Agt/Itih3/Sfrp2/Serpina3g/Timp2/Serpina3f/A2ml1/Serpinb8/Timp1 | 9 |
| GO:0048678 | BP | GO:0048678 | response to axon injury | 4/478 | 72/28943 | 0.031357325 | 0.167981801 | 0.13656949 | Dpysl3/Gap43/Nefh/Shh | 4 |
| GO:0055002 | BP | GO:0055002 | striated muscle cell development | 4/478 | 72/28943 | 0.031357325 | 0.167981801 | 0.13656949 | Tnnt1/Mylk3/Edn1/Tmod1 | 4 |
| GO:0030203 | BP | GO:0030203 | glycosaminoglycan metabolic process | 5/478 | 106/28943 | 0.031399923 | 0.167981801 | 0.13656949 | Has1/Angpt1/Itih3/Lyve1/Has3 | 5 |
| GO:0072091 | BP | GO:0072091 | regulation of stem cell proliferation | 5/478 | 106/28943 | 0.031399923 | 0.167981801 | 0.13656949 | Shox2/Eif2ak2/Kitl/Shh/Runx2 | 5 |
| GO:0035745 | BP | GO:0035745 | T-helper 2 cell cytokine production | 2/478 | 17/28943 | 0.031425596 | 0.167981801 | 0.13656949 | Gata3/Rsad2 | 2 |
| GO:0046068 | BP | GO:0046068 | cGMP metabolic process | 2/478 | 17/28943 | 0.031425596 | 0.167981801 | 0.13656949 | Gucy2c/Rora | 2 |
| GO:0061000 | BP | GO:0061000 | negative regulation of dendritic spine development | 2/478 | 17/28943 | 0.031425596 | 0.167981801 | 0.13656949 | Grin3a/Dnm3 | 2 |
| GO:0061308 | BP | GO:0061308 | cardiac neural crest cell development involved in heart development | 2/478 | 17/28943 | 0.031425596 | 0.167981801 | 0.13656949 | Pitx2/Edn1 | 2 |
| GO:0090136 | BP | GO:0090136 | epithelial cell-cell adhesion | 2/478 | 17/28943 | 0.031425596 | 0.167981801 | 0.13656949 | Plekha7/Serpinb8 | 2 |
| GO:0097531 | BP | GO:0097531 | mast cell migration | 2/478 | 17/28943 | 0.031425596 | 0.167981801 | 0.13656949 | Kitl/Ccl5 | 2 |
| GO:1902033 | BP | GO:1902033 | regulation of hematopoietic stem cell proliferation | 2/478 | 17/28943 | 0.031425596 | 0.167981801 | 0.13656949 | Eif2ak2/Kitl | 2 |
| GO:2000696 | BP | GO:2000696 | regulation of epithelial cell differentiation involved in kidney development | 2/478 | 17/28943 | 0.031425596 | 0.167981801 | 0.13656949 | Gata3/Wnt9b | 2 |
| GO:2001028 | BP | GO:2001028 | positive regulation of endothelial cell chemotaxis | 2/478 | 17/28943 | 0.031425596 | 0.167981801 | 0.13656949 | Hspb1/Shh | 2 |
| GO:2001034 | BP | GO:2001034 | positive regulation of double-strand break repair via nonhomologous end joining | 2/478 | 17/28943 | 0.031425596 | 0.167981801 | 0.13656949 | Dtx3l/Parp9 | 2 |
| GO:2001185 | BP | GO:2001185 | regulation of CD8-positive, alpha-beta T cell activation | 2/478 | 17/28943 | 0.031425596 | 0.167981801 | 0.13656949 | Socs1/Cd274 | 2 |
| GO:0035270 | BP | GO:0035270 | endocrine system development | 6/478 | 143/28943 | 0.031781967 | 0.168523312 | 0.137009739 | Pitx2/Tcf7l2/Gata3/Shh/Edn1/Onecut2 | 6 |
| GO:0048511 | BP | GO:0048511 | rhythmic process | 10/478 | 306/28943 | 0.031806286 | 0.168523312 | 0.137009739 | Grin3a/Fbxl21/Nhlh2/Agt/Zfhx3/Rora/Prkg2/Htr7/Spsb4/Inhba | 10 |
| GO:0003009 | BP | GO:0003009 | skeletal muscle contraction | 3/478 | 42/28943 | 0.031948947 | 0.168523312 | 0.137009739 | Atp2a1/Tnnt1/Actn3 | 3 |
| GO:0010464 | BP | GO:0010464 | regulation of mesenchymal cell proliferation | 3/478 | 42/28943 | 0.031948947 | 0.168523312 | 0.137009739 | Shox2/Shh/Wnt2 | 3 |
| GO:0014742 | BP | GO:0014742 | positive regulation of muscle hypertrophy | 3/478 | 42/28943 | 0.031948947 | 0.168523312 | 0.137009739 | Camk2d/Agt/Edn1 | 3 |
| GO:0060338 | BP | GO:0060338 | regulation of type I interferon-mediated signaling pathway | 3/478 | 42/28943 | 0.031948947 | 0.168523312 | 0.137009739 | Samhd1/Isg15/Usp29 | 3 |
| GO:0099174 | BP | GO:0099174 | regulation of presynapse organization | 3/478 | 42/28943 | 0.031948947 | 0.168523312 | 0.137009739 | Cbln1/Slitrk6/Fzd1 | 3 |
| GO:0110110 | BP | GO:0110110 | positive regulation of animal organ morphogenesis | 3/478 | 42/28943 | 0.031948947 | 0.168523312 | 0.137009739 | Gata3/Edn1/Wnt2 | 3 |
| GO:1900181 | BP | GO:1900181 | negative regulation of protein localization to nucleus | 3/478 | 42/28943 | 0.031948947 | 0.168523312 | 0.137009739 | Trim40/Angpt1/Dclk3 | 3 |
| GO:1901381 | BP | GO:1901381 | positive regulation of potassium ion transmembrane transport | 3/478 | 42/28943 | 0.031948947 | 0.168523312 | 0.137009739 | Gal/Kcnc2/Lrrc26 | 3 |
| GO:0002244 | BP | GO:0002244 | hematopoietic progenitor cell differentiation | 7/478 | 182/28943 | 0.03207421 | 0.168960845 | 0.137365454 | Gata3/Eif2ak2/Tal1/Kitl/Shh/Inhba/Fst | 7 |
| GO:0001657 | BP | GO:0001657 | ureteric bud development | 5/478 | 107/28943 | 0.032509806 | 0.170356503 | 0.138500127 | Ret/Gata3/Agt/Wnt9b/Shh | 5 |
| GO:0021761 | BP | GO:0021761 | limbic system development | 5/478 | 107/28943 | 0.032509806 | 0.170356503 | 0.138500127 | Pitx2/Nhlh2/Lef1/Foxb1/Zeb2 | 5 |
| GO:0070167 | BP | GO:0070167 | regulation of biomineral tissue development | 5/478 | 107/28943 | 0.032509806 | 0.170356503 | 0.138500127 | Fzd9/Actn3/Nell1/Fam20c/Isg15 | 5 |
| GO:1904427 | BP | GO:1904427 | positive regulation of calcium ion transmembrane transport | 5/478 | 107/28943 | 0.032509806 | 0.170356503 | 0.138500127 | Cxcl10/Npsr1/F2r/Ramp3/Cxcl9 | 5 |
| GO:0019080 | BP | GO:0019080 | viral gene expression | 4/478 | 73/28943 | 0.032757628 | 0.170536129 | 0.138646162 | Lef1/Trim21/Sp100/Ccl5 | 4 |
| GO:0043112 | BP | GO:0043112 | receptor metabolic process | 4/478 | 73/28943 | 0.032757628 | 0.170536129 | 0.138646162 | Dtx3l/Ramp3/Ache/Gria2 | 4 |
| GO:0061035 | BP | GO:0061035 | regulation of cartilage development | 4/478 | 73/28943 | 0.032757628 | 0.170536129 | 0.138646162 | Shox2/Prkg2/Bmp1/Runx2 | 4 |
| GO:1990868 | BP | GO:1990868 | response to chemokine | 4/478 | 73/28943 | 0.032757628 | 0.170536129 | 0.138646162 | Cxcl10/Cxcl9/Edn1/Ccl5 | 4 |
| GO:1990869 | BP | GO:1990869 | cellular response to chemokine | 4/478 | 73/28943 | 0.032757628 | 0.170536129 | 0.138646162 | Cxcl10/Cxcl9/Edn1/Ccl5 | 4 |
| GO:0033002 | BP | GO:0033002 | muscle cell proliferation | 9/478 | 266/28943 | 0.033543687 | 0.174400964 | 0.141788281 | Vipr2/Tcf7l2/Angpt1/Camk2d/Agt/Shh/Edn1/Wnt2/Ccl5 | 9 |
| GO:0042177 | BP | GO:0042177 | negative regulation of protein catabolic process | 5/478 | 108/28943 | 0.033643879 | 0.17469442 | 0.142026861 | Trim40/Nell1/Timp2/Shh/Timp1 | 5 |
| GO:0045066 | BP | GO:0045066 | regulatory T cell differentiation | 3/478 | 43/28943 | 0.033936331 | 0.175755863 | 0.142889815 | Socs1/Hspb1/Btn2a2 | 3 |
| GO:0098801 | BP | GO:0098801 | regulation of renal system process | 3/478 | 43/28943 | 0.033936331 | 0.175755863 | 0.142889815 | Agt/F2r/Edn1 | 3 |
| GO:0045109 | BP | GO:0045109 | intermediate filament organization | 4/478 | 74/28943 | 0.034193969 | 0.176590512 | 0.143568387 | Prph/Nefh/Shh/Krt10 | 4 |
| GO:0060675 | BP | GO:0060675 | ureteric bud morphogenesis | 4/478 | 74/28943 | 0.034193969 | 0.176590512 | 0.143568387 | Gata3/Agt/Wnt9b/Shh | 4 |
| GO:0060541 | BP | GO:0060541 | respiratory system development | 9/478 | 267/28943 | 0.034230167 | 0.176590512 | 0.143568387 | Foxa1/Pitx2/Adamts2/Edaradd/Sparc/Lef1/Itga3/Shh/Wnt2 | 9 |
| GO:0042310 | BP | GO:0042310 | vasoconstriction | 5/478 | 109/28943 | 0.034802252 | 0.176998623 | 0.143900182 | Agt/F2r/Casr/Htr7/Edn1 | 5 |
| GO:0110149 | BP | GO:0110149 | regulation of biomineralization | 5/478 | 109/28943 | 0.034802252 | 0.176998623 | 0.143900182 | Fzd9/Actn3/Nell1/Fam20c/Isg15 | 5 |
| GO:0001991 | BP | GO:0001991 | regulation of systemic arterial blood pressure by circulatory renin-angiotensin | 2/478 | 18/28943 | 0.034974183 | 0.176998623 | 0.143900182 | Agt/F2r | 2 |
| GO:0002076 | BP | GO:0002076 | osteoblast development | 2/478 | 18/28943 | 0.034974183 | 0.176998623 | 0.143900182 | Shh/Runx2 | 2 |
| GO:0002830 | BP | GO:0002830 | positive regulation of type 2 immune response | 2/478 | 18/28943 | 0.034974183 | 0.176998623 | 0.143900182 | Gata3/Rsad2 | 2 |
| GO:0010644 | BP | GO:0010644 | cell communication by electrical coupling | 2/478 | 18/28943 | 0.034974183 | 0.176998623 | 0.143900182 | Camk2d/Irx3 | 2 |
| GO:0042249 | BP | GO:0042249 | establishment of planar polarity of embryonic epithelium | 2/478 | 18/28943 | 0.034974183 | 0.176998623 | 0.143900182 | Sfrp2/Fzd1 | 2 |
| GO:0043278 | BP | GO:0043278 | response to morphine | 2/478 | 18/28943 | 0.034974183 | 0.176998623 | 0.143900182 | Adcy8/Ppp1r1b | 2 |
| GO:0060019 | BP | GO:0060019 | radial glial cell differentiation | 2/478 | 18/28943 | 0.034974183 | 0.176998623 | 0.143900182 | Gap43/Lef1 | 2 |
| GO:0060134 | BP | GO:0060134 | prepulse inhibition | 2/478 | 18/28943 | 0.034974183 | 0.176998623 | 0.143900182 | Grin3a/Fabp7 | 2 |
| GO:0060572 | BP | GO:0060572 | morphogenesis of an epithelial bud | 2/478 | 18/28943 | 0.034974183 | 0.176998623 | 0.143900182 | Shh/Wnt2 | 2 |
| GO:0061307 | BP | GO:0061307 | cardiac neural crest cell differentiation involved in heart development | 2/478 | 18/28943 | 0.034974183 | 0.176998623 | 0.143900182 | Pitx2/Edn1 | 2 |
| GO:0070314 | BP | GO:0070314 | G1 to G0 transition | 2/478 | 18/28943 | 0.034974183 | 0.176998623 | 0.143900182 | Wdr6/Zfp503 | 2 |
| GO:0099150 | BP | GO:0099150 | regulation of postsynaptic specialization assembly | 2/478 | 18/28943 | 0.034974183 | 0.176998623 | 0.143900182 | Cbln1/Gap43 | 2 |
| GO:1901077 | BP | GO:1901077 | regulation of relaxation of muscle | 2/478 | 18/28943 | 0.034974183 | 0.176998623 | 0.143900182 | Camk2d/Actn3 | 2 |
| GO:0010469 | BP | GO:0010469 | regulation of signaling receptor activity | 6/478 | 147/28943 | 0.035645261 | 0.179818203 | 0.146192505 | Tafa4/Grem2/Oprm1/Chrna4/Ramp3/Edn1 | 6 |
| GO:0007260 | BP | GO:0007260 | tyrosine phosphorylation of STAT protein | 4/478 | 75/28943 | 0.03566642 | 0.179818203 | 0.146192505 | Socs1/Parp14/Parp9/Ccl5 | 4 |
| GO:0050688 | BP | GO:0050688 | regulation of defense response to virus | 4/478 | 75/28943 | 0.03566642 | 0.179818203 | 0.146192505 | Dtx3l/Stat1/Parp9/Ccl5 | 4 |
| GO:0072163 | BP | GO:0072163 | mesonephric epithelium development | 5/478 | 110/28943 | 0.035985027 | 0.18029323 | 0.146578703 | Ret/Gata3/Agt/Wnt9b/Shh | 5 |
| GO:0072164 | BP | GO:0072164 | mesonephric tubule development | 5/478 | 110/28943 | 0.035985027 | 0.18029323 | 0.146578703 | Ret/Gata3/Agt/Wnt9b/Shh | 5 |
| GO:0001562 | BP | GO:0001562 | response to protozoan | 3/478 | 44/28943 | 0.035986402 | 0.18029323 | 0.146578703 | Batf2/Gbp6/Irgm2 | 3 |
| GO:0010830 | BP | GO:0010830 | regulation of myotube differentiation | 3/478 | 44/28943 | 0.035986402 | 0.18029323 | 0.146578703 | Shox2/Smyd1/Actn3 | 3 |
| GO:0046839 | BP | GO:0046839 | phospholipid dephosphorylation | 3/478 | 44/28943 | 0.035986402 | 0.18029323 | 0.146578703 | Inpp4b/Plpp4/Sgpp2 | 3 |
| GO:0008344 | BP | GO:0008344 | adult locomotory behavior | 5/478 | 111/28943 | 0.0371923 | 0.185536509 | 0.150841498 | Slitrk6/Klhl1/Grin2d/Pbx3/Tmod1 | 5 |
| GO:0014909 | BP | GO:0014909 | smooth muscle cell migration | 5/478 | 111/28943 | 0.0371923 | 0.185536509 | 0.150841498 | Camk2d/Agt/Grb10/Nox4/Ccl5 | 5 |
| GO:0010951 | BP | GO:0010951 | negative regulation of endopeptidase activity | 7/478 | 188/28943 | 0.037218819 | 0.185536509 | 0.150841498 | Agt/Sfrp2/Serpina3g/Timp2/Serpina3f/Serpinb8/Timp1 | 7 |
| GO:0045580 | BP | GO:0045580 | regulation of T cell differentiation | 7/478 | 188/28943 | 0.037218819 | 0.185536509 | 0.150841498 | Gata3/Socs1/Lef1/Hspb1/Btn2a2/Shh/Il1rl2 | 7 |
| GO:0050803 | BP | GO:0050803 | regulation of synapse structure or activity | 9/478 | 272/28943 | 0.037808068 | 0.187715182 | 0.152612763 | Cntnap4/Cbln1/Slc17a6/Slitrk6/Sparc/Lingo4/Fzd1/Dnm3/Epha7 | 9 |
| GO:0022407 | BP | GO:0022407 | regulation of cell-cell adhesion | 14/478 | 497/28943 | 0.03805757 | 0.187715182 | 0.152612763 | L1cam/Gata3/Socs1/Lef1/Hspb1/Kitl/Btn2a2/Shh/Cd274/Mex3b/Epha7/Ccl5/Il1rl2/H2-Ob | 14 |
| GO:0040013 | BP | GO:0040013 | negative regulation of locomotion | 11/478 | 360/28943 | 0.038083613 | 0.187715182 | 0.152612763 | Dpysl3/Gata3/Has1/Sema4g/Adarb1/Sfrp2/Shh/Sp100/Wnt3/Srgap1/Timp1 | 11 |
| GO:0003298 | BP | GO:0003298 | physiological muscle hypertrophy | 3/478 | 45/28943 | 0.038098795 | 0.187715182 | 0.152612763 | Camk2d/Agt/Edn1 | 3 |
| GO:0003301 | BP | GO:0003301 | physiological cardiac muscle hypertrophy | 3/478 | 45/28943 | 0.038098795 | 0.187715182 | 0.152612763 | Camk2d/Agt/Edn1 | 3 |
| GO:0006509 | BP | GO:0006509 | membrane protein ectodomain proteolysis | 3/478 | 45/28943 | 0.038098795 | 0.187715182 | 0.152612763 | Gpld1/Timp2/Timp1 | 3 |
| GO:0046636 | BP | GO:0046636 | negative regulation of alpha-beta T cell activation | 3/478 | 45/28943 | 0.038098795 | 0.187715182 | 0.152612763 | Socs1/Shh/Cd274 | 3 |
| GO:0061049 | BP | GO:0061049 | cell growth involved in cardiac muscle cell development | 3/478 | 45/28943 | 0.038098795 | 0.187715182 | 0.152612763 | Camk2d/Agt/Edn1 | 3 |
| GO:2001239 | BP | GO:2001239 | regulation of extrinsic apoptotic signaling pathway in absence of ligand | 3/478 | 45/28943 | 0.038098795 | 0.187715182 | 0.152612763 | Ret/Eya2/Inhba | 3 |
| GO:0001659 | BP | GO:0001659 | temperature homeostasis | 7/478 | 189/28943 | 0.038125974 | 0.187715182 | 0.152612763 | Zfp423/Actn3/Grb10/Esrrg/Cckar/Ache/Ccl5 | 7 |
| GO:0006641 | BP | GO:0006641 | triglyceride metabolic process | 5/478 | 112/28943 | 0.038424158 | 0.187844316 | 0.152717748 | Tcf7l2/Gpld1/Gpat2/Slc22a4/Mogat1 | 5 |
| GO:0010867 | BP | GO:0010867 | positive regulation of triglyceride biosynthetic process | 2/478 | 19/28943 | 0.038669679 | 0.187844316 | 0.152717748 | Tcf7l2/Gpld1 | 2 |
| GO:0014072 | BP | GO:0014072 | response to isoquinoline alkaloid | 2/478 | 19/28943 | 0.038669679 | 0.187844316 | 0.152717748 | Adcy8/Ppp1r1b | 2 |
| GO:0015669 | BP | GO:0015669 | gas transport | 2/478 | 19/28943 | 0.038669679 | 0.187844316 | 0.152717748 | Hbb-bt/Hba-a1 | 2 |
| GO:0040037 | BP | GO:0040037 | negative regulation of fibroblast growth factor receptor signaling pathway | 2/478 | 19/28943 | 0.038669679 | 0.187844316 | 0.152717748 | Tcf7l2/Gata3 | 2 |
| GO:0060033 | BP | GO:0060033 | anatomical structure regression | 2/478 | 19/28943 | 0.038669679 | 0.187844316 | 0.152717748 | Slc17a6/Lef1 | 2 |
| GO:0060231 | BP | GO:0060231 | mesenchymal to epithelial transition | 2/478 | 19/28943 | 0.038669679 | 0.187844316 | 0.152717748 | Gata3/Wnt9b | 2 |
| GO:0086011 | BP | GO:0086011 | membrane repolarization during action potential | 2/478 | 19/28943 | 0.038669679 | 0.187844316 | 0.152717748 | Kcnj5/Kcnh7 | 2 |
| GO:0106070 | BP | GO:0106070 | regulation of adenylate cyclase-activating G protein-coupled receptor signaling pathway | 2/478 | 19/28943 | 0.038669679 | 0.187844316 | 0.152717748 | Oprm1/Mrap2 | 2 |
| GO:1900452 | BP | GO:1900452 | regulation of long-term synaptic depression | 2/478 | 19/28943 | 0.038669679 | 0.187844316 | 0.152717748 | Adcy8/Cbln1 | 2 |
| GO:1902074 | BP | GO:1902074 | response to salt | 2/478 | 19/28943 | 0.038669679 | 0.187844316 | 0.152717748 | Nefh/Runx2 | 2 |
| GO:0045861 | BP | GO:0045861 | negative regulation of proteolysis | 11/478 | 361/28943 | 0.038724815 | 0.187883582 | 0.152749671 | Agt/Itih3/Sfrp2/Serpina3g/Timp2/Trim21/Serpina3f/Shh/A2ml1/Serpinb8/Timp1 | 11 |
| GO:0050920 | BP | GO:0050920 | regulation of chemotaxis | 8/478 | 231/28943 | 0.038872232 | 0.18836993 | 0.153145074 | Cxcl10/Sema4g/Casr/Hspb1/Shh/Wnt3/Edn1/Ccl5 | 8 |
| GO:0032409 | BP | GO:0032409 | regulation of transporter activity | 10/478 | 317/28943 | 0.038952919 | 0.188532128 | 0.15327694 | Hcn4/Oprm1/Chrna4/Camk2d/Gal/Cnksr3/Kcnc2/Hcn3/Edn1/Lrrc26 | 10 |
| GO:0001823 | BP | GO:0001823 | mesonephros development | 5/478 | 113/28943 | 0.039680682 | 0.191590042 | 0.15576303 | Ret/Gata3/Agt/Wnt9b/Shh | 5 |
| GO:1902106 | BP | GO:1902106 | negative regulation of leukocyte differentiation | 5/478 | 113/28943 | 0.039680682 | 0.191590042 | 0.15576303 | Calca/Socs1/Inpp4b/Hspb1/Shh | 5 |
| GO:0050921 | BP | GO:0050921 | positive regulation of chemotaxis | 6/478 | 151/28943 | 0.039798254 | 0.191694124 | 0.155847649 | Cxcl10/Casr/Hspb1/Shh/Edn1/Ccl5 | 6 |
| GO:1900180 | BP | GO:1900180 | regulation of protein localization to nucleus | 6/478 | 151/28943 | 0.039798254 | 0.191694124 | 0.155847649 | Trim40/Dtx3l/Angpt1/Shh/Parp9/Dclk3 | 6 |
| GO:0002292 | BP | GO:0002292 | T cell differentiation involved in immune response | 4/478 | 78/28943 | 0.040300927 | 0.19272048 | 0.156682078 | Gata3/Rora/Lef1/Clec4d | 4 |
| GO:0006919 | BP | GO:0006919 | activation of cysteine-type endopeptidase activity involved in apoptotic process | 4/478 | 78/28943 | 0.040300927 | 0.19272048 | 0.156682078 | Ret/Xdh/F2r/Stat1 | 4 |
| GO:0038034 | BP | GO:0038034 | signal transduction in absence of ligand | 4/478 | 78/28943 | 0.040300927 | 0.19272048 | 0.156682078 | Ret/Kitl/Eya2/Inhba | 4 |
| GO:0072171 | BP | GO:0072171 | mesonephric tubule morphogenesis | 4/478 | 78/28943 | 0.040300927 | 0.19272048 | 0.156682078 | Gata3/Agt/Wnt9b/Shh | 4 |
| GO:0097192 | BP | GO:0097192 | extrinsic apoptotic signaling pathway in absence of ligand | 4/478 | 78/28943 | 0.040300927 | 0.19272048 | 0.156682078 | Ret/Kitl/Eya2/Inhba | 4 |
| GO:0098661 | BP | GO:0098661 | inorganic anion transmembrane transport | 4/478 | 78/28943 | 0.040300927 | 0.19272048 | 0.156682078 | Glra3/Gabrq/Ano5/Casr | 4 |
| GO:0003231 | BP | GO:0003231 | cardiac ventricle development | 6/478 | 152/28943 | 0.040882383 | 0.19503388 | 0.158562876 | Pitx2/Gata3/Pou4f1/Sfrp2/Fzd1/Epor | 6 |
| GO:0046660 | BP | GO:0046660 | female sex differentiation | 6/478 | 152/28943 | 0.040882383 | 0.19503388 | 0.158562876 | Angpt1/Agt/Nefh/Kitl/Inhba/Fst | 6 |
| GO:1903532 | BP | GO:1903532 | positive regulation of secretion by cell | 11/478 | 365/28943 | 0.041364907 | 0.196455954 | 0.159719024 | Adcy8/Tcf7l2/Gpld1/Gal/Syt9/Agt/Baiap3/Casr/Cckar/Nnat/Edn1 | 11 |
| GO:0007611 | BP | GO:0007611 | learning or memory | 10/478 | 321/28943 | 0.041805865 | 0.196455954 | 0.159719024 | Adcy8/Fzd9/Agt/Shc3/Itga3/Grm4/Foxb1/Itga5/Itga8/Ppp1r1b | 10 |
| GO:0071347 | BP | GO:0071347 | cellular response to interleukin-1 | 4/478 | 79/28943 | 0.041918228 | 0.196455954 | 0.159719024 | Rora/Mylk3/Ccl5/Saa3 | 4 |
| GO:0035725 | BP | GO:0035725 | sodium ion transmembrane transport | 6/478 | 153/28943 | 0.04198501 | 0.196455954 | 0.159719024 | Hcn4/Slc6a11/Camk2d/Gm13629/Cnksr3/Hcn3 | 6 |
| GO:0051346 | BP | GO:0051346 | negative regulation of hydrolase activity | 11/478 | 366/28943 | 0.042043924 | 0.196455954 | 0.159719024 | Fzd10/Agt/Itih3/Sfrp2/Serpina3g/Timp2/Serpina3f/A2ml1/Serpinb8/Timp1/Ppp1r1b | 11 |
| GO:0051962 | BP | GO:0051962 | positive regulation of nervous system development | 11/478 | 366/28943 | 0.042043924 | 0.196455954 | 0.159719024 | Shox2/Cbln1/L1cam/Slitrk6/Oprm1/Lingo4/Ache/Shh/Wnt3/Wnt2/Zeb2 | 11 |
| GO:0003161 | BP | GO:0003161 | cardiac conduction system development | 2/478 | 20/28943 | 0.042506285 | 0.196455954 | 0.159719024 | Shox2/Irx3 | 2 |
| GO:0006670 | BP | GO:0006670 | sphingosine metabolic process | 2/478 | 20/28943 | 0.042506285 | 0.196455954 | 0.159719024 | Sptssb/Sgpp2 | 2 |
| GO:0007190 | BP | GO:0007190 | activation of adenylate cyclase activity | 2/478 | 20/28943 | 0.042506285 | 0.196455954 | 0.159719024 | Vipr2/Calca | 2 |
| GO:0009159 | BP | GO:0009159 | deoxyribonucleoside monophosphate catabolic process | 2/478 | 20/28943 | 0.042506285 | 0.196455954 | 0.159719024 | Xdh/Cda | 2 |
| GO:0014856 | BP | GO:0014856 | skeletal muscle cell proliferation | 2/478 | 20/28943 | 0.042506285 | 0.196455954 | 0.159719024 | Angpt1/Shh | 2 |
| GO:0021516 | BP | GO:0021516 | dorsal spinal cord development | 2/478 | 20/28943 | 0.042506285 | 0.196455954 | 0.159719024 | Tal1/Pbx3 | 2 |
| GO:0043116 | BP | GO:0043116 | negative regulation of vascular permeability | 2/478 | 20/28943 | 0.042506285 | 0.196455954 | 0.159719024 | Angpt1/Akap12 | 2 |
| GO:0045019 | BP | GO:0045019 | negative regulation of nitric oxide biosynthetic process | 2/478 | 20/28943 | 0.042506285 | 0.196455954 | 0.159719024 | Oprm1/Epor | 2 |
| GO:0050884 | BP | GO:0050884 | neuromuscular process controlling posture | 2/478 | 20/28943 | 0.042506285 | 0.196455954 | 0.159719024 | Pou4f1/Adarb1 | 2 |
| GO:0060973 | BP | GO:0060973 | cell migration involved in heart development | 2/478 | 20/28943 | 0.042506285 | 0.196455954 | 0.159719024 | Pitx2/Edn1 | 2 |
| GO:0071397 | BP | GO:0071397 | cellular response to cholesterol | 2/478 | 20/28943 | 0.042506285 | 0.196455954 | 0.159719024 | Gpld1/Inhba | 2 |
| GO:0090594 | BP | GO:0090594 | inflammatory response to wounding | 2/478 | 20/28943 | 0.042506285 | 0.196455954 | 0.159719024 | F2r/Timp1 | 2 |
| GO:1904406 | BP | GO:1904406 | negative regulation of nitric oxide metabolic process | 2/478 | 20/28943 | 0.042506285 | 0.196455954 | 0.159719024 | Oprm1/Epor | 2 |
| GO:2000846 | BP | GO:2000846 | regulation of corticosteroid hormone secretion | 2/478 | 20/28943 | 0.042506285 | 0.196455954 | 0.159719024 | Gal/Agt | 2 |
| GO:0001990 | BP | GO:0001990 | regulation of systemic arterial blood pressure by hormone | 3/478 | 47/28943 | 0.042508876 | 0.196455954 | 0.159719024 | Agt/F2r/Edn1 | 3 |
| GO:0009394 | BP | GO:0009394 | 2'-deoxyribonucleotide metabolic process | 3/478 | 47/28943 | 0.042508876 | 0.196455954 | 0.159719024 | Xdh/Samhd1/Cda | 3 |
| GO:0010559 | BP | GO:0010559 | regulation of glycoprotein biosynthetic process | 3/478 | 47/28943 | 0.042508876 | 0.196455954 | 0.159719024 | Tcf7l2/Necab1/Necab2 | 3 |
| GO:0019692 | BP | GO:0019692 | deoxyribose phosphate metabolic process | 3/478 | 47/28943 | 0.042508876 | 0.196455954 | 0.159719024 | Xdh/Samhd1/Cda | 3 |
| GO:0035774 | BP | GO:0035774 | positive regulation of insulin secretion involved in cellular response to glucose stimulus | 3/478 | 47/28943 | 0.042508876 | 0.196455954 | 0.159719024 | Adcy8/Gpld1/Baiap3 | 3 |
| GO:0043114 | BP | GO:0043114 | regulation of vascular permeability | 3/478 | 47/28943 | 0.042508876 | 0.196455954 | 0.159719024 | Angpt1/Akap12/Mylk3 | 3 |
| GO:0060323 | BP | GO:0060323 | head morphogenesis | 3/478 | 47/28943 | 0.042508876 | 0.196455954 | 0.159719024 | Tcf7l2/Lef1/Wnt3 | 3 |
| GO:0008544 | BP | GO:0008544 | epidermis development | 11/478 | 367/28943 | 0.042730607 | 0.197252385 | 0.160366525 | Slitrk6/Tmem132e/Mreg/Edaradd/Gal/Lgr5/Lhfpl5/Shh/Inhba/Fst/Krt10 | 11 |
| GO:0009749 | BP | GO:0009749 | response to glucose | 7/478 | 194/28943 | 0.042878983 | 0.19770875 | 0.16073755 | Adcy8/Tcf7l2/Gpld1/Baiap3/Nnat/Nox4/Mafa | 7 |
| GO:0032103 | BP | GO:0032103 | positive regulation of response to external stimulus | 13/478 | 459/28943 | 0.042947628 | 0.197796859 | 0.160809183 | Cxcl10/Oprm1/Tafa3/Trim30d/Casr/Hspb1/Oasl1/Shh/Parp9/Usp29/Edn1/Ccl5/Il17rb | 13 |
| GO:0016050 | BP | GO:0016050 | vesicle organization | 10/478 | 323/28943 | 0.043284572 | 0.199119007 | 0.161884091 | Syt9/Ccdc136/Baiap3/Unc13c/Vav3/Tyrp1/Vamp1/Rab38/Dnm3/Zeb2 | 10 |
| GO:0043434 | BP | GO:0043434 | response to peptide hormone | 11/478 | 369/28943 | 0.0441271 | 0.202761231 | 0.164845225 | Adcy8/Atp2a1/Gpld1/Agt/Socs1/Stat1/Serpina3g/Grb10/Ache/Serpina3f/Edn1 | 11 |
| GO:0002347 | BP | GO:0002347 | response to tumor cell | 3/478 | 48/28943 | 0.044805633 | 0.204733793 | 0.166448922 | Rbms3/Cd274/Plk5 | 3 |
| GO:0045761 | BP | GO:0045761 | regulation of adenylate cyclase activity | 3/478 | 48/28943 | 0.044805633 | 0.204733793 | 0.166448922 | Vipr2/Calca/Timp2 | 3 |
| GO:0048010 | BP | GO:0048010 | vascular endothelial growth factor receptor signaling pathway | 3/478 | 48/28943 | 0.044805633 | 0.204733793 | 0.166448922 | Angpt1/Hspb1/Grb10 | 3 |
| GO:0048741 | BP | GO:0048741 | skeletal muscle fiber development | 3/478 | 48/28943 | 0.044805633 | 0.204733793 | 0.166448922 | Shox2/Actn3/Ryr1 | 3 |
| GO:0019722 | BP | GO:0019722 | calcium-mediated signaling | 7/478 | 196/28943 | 0.044882707 | 0.204733793 | 0.166448922 | L1cam/Ccr10/Rit2/Actn3/Rcan3/Samd14/Edn1 | 7 |
| GO:0060078 | BP | GO:0060078 | regulation of postsynaptic membrane potential | 5/478 | 117/28943 | 0.044954795 | 0.204733793 | 0.166448922 | Cbln1/Chrna3/Oprm1/Chrna4/Grin2d | 5 |
| GO:1903707 | BP | GO:1903707 | negative regulation of hemopoiesis | 5/478 | 117/28943 | 0.044954795 | 0.204733793 | 0.166448922 | Calca/Socs1/Inpp4b/Hspb1/Shh | 5 |
| GO:0097191 | BP | GO:0097191 | extrinsic apoptotic signaling pathway | 8/478 | 238/28943 | 0.044966576 | 0.204733793 | 0.166448922 | Ret/Agt/Sfrp2/Kitl/Tnfsf10/Eya2/Sp100/Inhba | 8 |
| GO:0007405 | BP | GO:0007405 | neuroblast proliferation | 4/478 | 81/28943 | 0.045261507 | 0.204908385 | 0.166590866 | Fzd9/Tafa3/Lef1/Shh | 4 |
| GO:0008543 | BP | GO:0008543 | fibroblast growth factor receptor signaling pathway | 4/478 | 81/28943 | 0.045261507 | 0.204908385 | 0.166590866 | Tcf7l2/Gata3/Fam20c/Runx2 | 4 |
| GO:0045471 | BP | GO:0045471 | response to ethanol | 4/478 | 81/28943 | 0.045261507 | 0.204908385 | 0.166590866 | Grin3a/Glra3/Oprm1/Shh | 4 |
| GO:0048663 | BP | GO:0048663 | neuron fate commitment | 4/478 | 81/28943 | 0.045261507 | 0.204908385 | 0.166590866 | Foxa1/Pou4f1/Shh/Tunar | 4 |
| GO:0051145 | BP | GO:0051145 | smooth muscle cell differentiation | 4/478 | 81/28943 | 0.045261507 | 0.204908385 | 0.166590866 | Pitx2/Agt/Shh/Itga8 | 4 |
| GO:0050767 | BP | GO:0050767 | regulation of neurogenesis | 13/478 | 463/28943 | 0.0454527 | 0.20554092 | 0.167105118 | Shox2/L1cam/Pou4f1/Oprm1/Lef1/Sema4g/Cit/Ache/Shh/Wnt3/Epha7/Wnt2/Zeb2 | 13 |
| GO:1903037 | BP | GO:1903037 | regulation of leukocyte cell-cell adhesion | 11/478 | 371/28943 | 0.045554643 | 0.205768881 | 0.16729045 | Gata3/Socs1/Lef1/Hspb1/Kitl/Btn2a2/Shh/Cd274/Ccl5/Il1rl2/H2-Ob | 11 |
| GO:0042445 | BP | GO:0042445 | hormone metabolic process | 8/478 | 239/28943 | 0.045885533 | 0.206891308 | 0.168202985 | Foxa1/Tcf7l2/Gata3/Gal/Agt/Cyp2d9/Shh/Crabp1 | 8 |
| GO:0009746 | BP | GO:0009746 | response to hexose | 7/478 | 197/28943 | 0.045906761 | 0.206891308 | 0.168202985 | Adcy8/Tcf7l2/Gpld1/Baiap3/Nnat/Nox4/Mafa | 7 |
| GO:0019751 | BP | GO:0019751 | polyol metabolic process | 5/478 | 118/28943 | 0.046335602 | 0.208058367 | 0.169151806 | Pcbd1/Mogat1/Inpp4b/Sptssb/Sgpp2 | 5 |
| GO:0001976 | BP | GO:0001976 | nervous system process involved in regulation of systemic arterial blood pressure | 2/478 | 21/28943 | 0.046478353 | 0.208058367 | 0.169151806 | Calca/Agt | 2 |
| GO:0002577 | BP | GO:0002577 | regulation of antigen processing and presentation | 2/478 | 21/28943 | 0.046478353 | 0.208058367 | 0.169151806 | Tapbpl/H2-Ob | 2 |
| GO:0044790 | BP | GO:0044790 | suppression of viral release by host | 2/478 | 21/28943 | 0.046478353 | 0.208058367 | 0.169151806 | Trim30d/Trim21 | 2 |
| GO:0070230 | BP | GO:0070230 | positive regulation of lymphocyte apoptotic process | 2/478 | 21/28943 | 0.046478353 | 0.208058367 | 0.169151806 | Cd274/Ccl5 | 2 |
| GO:0099558 | BP | GO:0099558 | maintenance of synapse structure | 2/478 | 21/28943 | 0.046478353 | 0.208058367 | 0.169151806 | Cbln4/Cbln1 | 2 |
| GO:0051147 | BP | GO:0051147 | regulation of muscle cell differentiation | 6/478 | 157/28943 | 0.046581747 | 0.208287698 | 0.169338253 | Shox2/Smyd1/Actn3/Shh/Mylk3/Edn1 | 6 |
| GO:0045088 | BP | GO:0045088 | regulation of innate immune response | 8/478 | 240/28943 | 0.046816717 | 0.208550677 | 0.169552055 | Socs1/Trim30d/Samhd1/Parp14/Trim21/Isg15/Parp9/Usp29 | 8 |
| GO:0007259 | BP | GO:0007259 | receptor signaling pathway via JAK-STAT | 7/478 | 198/28943 | 0.04694568 | 0.208550677 | 0.169552055 | Ret/Agt/Socs1/Parp14/Stat1/Parp9/Ccl5 | 7 |
| GO:0051302 | BP | GO:0051302 | regulation of cell division | 7/478 | 198/28943 | 0.04694568 | 0.208550677 | 0.169552055 | Tal1/Wnt9b/Sfrp2/Cit/Shh/Esrrb/Plk5 | 7 |
| GO:0002711 | BP | GO:0002711 | positive regulation of T cell mediated immunity | 4/478 | 82/28943 | 0.046987423 | 0.208550677 | 0.169552055 | Gata3/Rsad2/H2-Q2/H2-T24 | 4 |
| GO:0003208 | BP | GO:0003208 | cardiac ventricle morphogenesis | 4/478 | 82/28943 | 0.046987423 | 0.208550677 | 0.169552055 | Gata3/Pou4f1/Sfrp2/Epor | 4 |
| GO:0043279 | BP | GO:0043279 | response to alkaloid | 4/478 | 82/28943 | 0.046987423 | 0.208550677 | 0.169552055 | Adcy8/Tacr3/Ryr1/Ppp1r1b | 4 |
| GO:0009262 | BP | GO:0009262 | deoxyribonucleotide metabolic process | 3/478 | 49/28943 | 0.04716285 | 0.208550677 | 0.169552055 | Xdh/Samhd1/Cda | 3 |
| GO:0033628 | BP | GO:0033628 | regulation of cell adhesion mediated by integrin | 3/478 | 49/28943 | 0.04716285 | 0.208550677 | 0.169552055 | Ret/Epha8/Ccl5 | 3 |
| GO:0045214 | BP | GO:0045214 | sarcomere organization | 3/478 | 49/28943 | 0.04716285 | 0.208550677 | 0.169552055 | Tnnt1/Mylk3/Edn1 | 3 |
| GO:0089718 | BP | GO:0089718 | amino acid import across plasma membrane | 3/478 | 49/28943 | 0.04716285 | 0.208550677 | 0.169552055 | Slc7a3/Agt/Slc22a4 | 3 |
| GO:0071241 | BP | GO:0071241 | cellular response to inorganic substance | 8/478 | 241/28943 | 0.047760171 | 0.210958364 | 0.171509509 | Adcy8/Glra3/Gpld1/Syt9/Kcnc2/Shh/Krt10/Kcnh1 | 8 |
| GO:0006109 | BP | GO:0006109 | regulation of carbohydrate metabolic process | 7/478 | 199/28943 | 0.047999509 | 0.211781258 | 0.172178523 | Tcf7l2/Gpld1/Rora/Actn3/Grb10/Esrrb/Igfbp4 | 7 |
| GO:0001894 | BP | GO:0001894 | tissue homeostasis | 9/478 | 286/28943 | 0.049159227 | 0.216658711 | 0.176143901 | Calca/Angpt1/F2r/Cracd/Crb1/Tex15/Esrrb/Nox4/Col11a2 | 9 |
| GO:0003254 | BP | GO:0003254 | regulation of membrane depolarization | 3/478 | 50/28943 | 0.049579975 | 0.217791902 | 0.177065187 | Hcn4/Camk2d/Hcn3 | 3 |
| GO:0045663 | BP | GO:0045663 | positive regulation of myoblast differentiation | 3/478 | 50/28943 | 0.049579975 | 0.217791902 | 0.177065187 | Smyd1/Zfhx3/Cxcl9 | 3 |
| GO:1903018 | BP | GO:1903018 | regulation of glycoprotein metabolic process | 3/478 | 50/28943 | 0.049579975 | 0.217791902 | 0.177065187 | Tcf7l2/Necab1/Necab2 | 3 |
| GO:0097060 | CC | GO:0097060 | synaptic membrane | 29/474 | 469/28804 | 1.40E-09 | 4.93E-07 | 3.72E-07 | Adcy8/Cntnap4/Grin3a/Ntng1/Cbln1/L1cam/Chrna3/Glra3/Oprm1/Slc6a11/Chrna4/Calb2/Gabrq/Chrnb3/F2r/Grin2d/Kcnc2/Unc13c/Itga3/Hspb1/Grm4/Ank1/Ache/Kctd8/Epha7/Kctd16/Kcnh1/Gria2/Itga8 | 29 |
| GO:0045211 | CC | GO:0045211 | postsynaptic membrane | 20/474 | 326/28804 | 5.80E-07 | 0.000102112 | 7.70E-05 | Grin3a/Cbln1/Chrna3/Glra3/Oprm1/Slc6a11/Chrna4/Gabrq/Chrnb3/F2r/Grin2d/Kcnc2/Hspb1/Ank1/Ache/Kctd8/Epha7/Kctd16/Kcnh1/Gria2 | 20 |
| GO:0043195 | CC | GO:0043195 | terminal bouton | 10/474 | 88/28804 | 1.90E-06 | 0.000201535 | 0.000151874 | Hcn4/Calca/Prph/L1cam/Calb2/Kcnc2/Unc13c/Grm4/Cckar/Gria2 | 10 |
| GO:0034702 | CC | GO:0034702 | ion channel complex | 18/474 | 295/28804 | 2.29E-06 | 0.000201535 | 0.000151874 | Hcn4/Grin3a/Chrna3/Glra3/Chrna4/Vwc2l/Gabrq/Kcnj5/Chrnb3/Grin2d/Kcnc2/Vwc2/Kcng4/Hcn3/Lrrc26/Kcnh1/Ryr1/Gria2 | 18 |
| GO:0043235 | CC | GO:0043235 | receptor complex | 22/474 | 430/28804 | 3.27E-06 | 0.000230461 | 0.000173673 | Ret/Grin3a/Chrna3/Chrna4/Vwc2l/Gabrq/Chrnb3/Grin2d/Cubn/Vwc2/Ror2/Itga3/Ramp3/Epha8/Kctd8/Insrr/Itga7/Epha7/Kctd16/Itga5/Gria2/Itga8 | 22 |
| GO:0098802 | CC | GO:0098802 | plasma membrane signaling receptor complex | 14/474 | 199/28804 | 6.08E-06 | 0.00034285 | 0.000258367 | Grin3a/Chrna3/Chrna4/Vwc2l/Chrnb3/Grin2d/Vwc2/Itga3/Ramp3/Insrr/Itga7/Itga5/Gria2/Itga8 | 14 |
| GO:0042734 | CC | GO:0042734 | presynaptic membrane | 14/474 | 201/28804 | 6.82E-06 | 0.00034285 | 0.000258367 | Adcy8/Cntnap4/Ntng1/L1cam/Oprm1/Slc6a11/Chrna4/Kcnc2/Unc13c/Grm4/Ache/Kctd16/Kcnh1/Gria2 | 14 |
| GO:0043679 | CC | GO:0043679 | axon terminus | 13/474 | 194/28804 | 2.18E-05 | 0.00095881 | 0.000722548 | Hcn4/Calca/Prph/L1cam/Calb2/Kcnc2/Unc13c/Hcn3/Casr/Grm4/Cckar/Pdyn/Gria2 | 13 |
| GO:0060076 | CC | GO:0060076 | excitatory synapse | 8/474 | 79/28804 | 4.76E-05 | 0.001861104 | 0.001402507 | Adcy8/Cbln1/Slc17a6/Calb2/Unc13c/Itga3/Grm4/Kcnh1 | 8 |
| GO:1902495 | CC | GO:1902495 | transmembrane transporter complex | 18/474 | 373/28804 | 5.42E-05 | 0.001907981 | 0.001437833 | Hcn4/Grin3a/Chrna3/Glra3/Chrna4/Vwc2l/Gabrq/Kcnj5/Chrnb3/Grin2d/Kcnc2/Vwc2/Kcng4/Hcn3/Lrrc26/Kcnh1/Ryr1/Gria2 | 18 |
| GO:0044306 | CC | GO:0044306 | neuron projection terminus | 13/474 | 215/28804 | 6.33E-05 | 0.00197345 | 0.001487169 | Hcn4/Calca/Prph/L1cam/Calb2/Kcnc2/Unc13c/Hcn3/Casr/Grm4/Cckar/Pdyn/Gria2 | 13 |
| GO:0099240 | CC | GO:0099240 | intrinsic component of synaptic membrane | 14/474 | 247/28804 | 6.73E-05 | 0.00197345 | 0.001487169 | Adcy8/Cntnap4/Grin3a/Ntng1/Chrna3/Glra3/Oprm1/Slc6a11/Chrna4/Grin2d/Grm4/Epha7/Kcnh1/Gria2 | 14 |
| GO:0034703 | CC | GO:0034703 | cation channel complex | 13/474 | 224/28804 | 9.59E-05 | 0.002586648 | 0.001949268 | Hcn4/Grin3a/Vwc2l/Kcnj5/Grin2d/Kcnc2/Vwc2/Kcng4/Hcn3/Lrrc26/Kcnh1/Ryr1/Gria2 | 13 |
| GO:0099699 | CC | GO:0099699 | integral component of synaptic membrane | 13/474 | 227/28804 | 0.000109544 | 0.002586648 | 0.001949268 | Adcy8/Cntnap4/Grin3a/Chrna3/Glra3/Oprm1/Slc6a11/Chrna4/Grin2d/Grm4/Epha7/Kcnh1/Gria2 | 13 |
| GO:1990351 | CC | GO:1990351 | transporter complex | 18/474 | 395/28804 | 0.000111966 | 0.002586648 | 0.001949268 | Hcn4/Grin3a/Chrna3/Glra3/Chrna4/Vwc2l/Gabrq/Kcnj5/Chrnb3/Grin2d/Kcnc2/Vwc2/Kcng4/Hcn3/Lrrc26/Kcnh1/Ryr1/Gria2 | 18 |
| GO:0030017 | CC | GO:0030017 | sarcomere | 12/474 | 198/28804 | 0.000117575 | 0.002586648 | 0.001949268 | Atp2a1/Tnnt1/Ahnak2/Actn3/Hspb1/Pygm/Ank1/Asb2/Synpo2/Tmod1/Jph1/Ryr1 | 12 |
| GO:0031674 | CC | GO:0031674 | I band | 10/474 | 144/28804 | 0.00014279 | 0.002956603 | 0.002228062 | Atp2a1/Ahnak2/Actn3/Hspb1/Pygm/Ank1/Asb2/Synpo2/Jph1/Ryr1 | 10 |
| GO:0098688 | CC | GO:0098688 | parallel fiber to Purkinje cell synapse | 5/474 | 32/28804 | 0.000164875 | 0.003224213 | 0.00242973 | Cbln1/Calb2/Unc13c/Grm4/Kcnh1 | 5 |
| GO:0008076 | CC | GO:0008076 | voltage-gated potassium channel complex | 7/474 | 76/28804 | 0.000256918 | 0.004521757 | 0.003407544 | Hcn4/Kcnj5/Kcnc2/Kcng4/Hcn3/Lrrc26/Kcnh1 | 7 |
| GO:0016529 | CC | GO:0016529 | sarcoplasmic reticulum | 7/474 | 76/28804 | 0.000256918 | 0.004521757 | 0.003407544 | Atp2a1/Xdh/Pygm/Ank1/Srl/Jph1/Ryr1 | 7 |
| GO:0098889 | CC | GO:0098889 | intrinsic component of presynaptic membrane | 9/474 | 129/28804 | 0.000294403 | 0.004934753 | 0.003718773 | Adcy8/Cntnap4/Ntng1/Oprm1/Slc6a11/Chrna4/Grm4/Kcnh1/Gria2 | 9 |
| GO:0030018 | CC | GO:0030018 | Z disc | 9/474 | 131/28804 | 0.000329999 | 0.005172175 | 0.003897692 | Ahnak2/Actn3/Hspb1/Pygm/Ank1/Asb2/Synpo2/Jph1/Ryr1 | 9 |
| GO:0062023 | CC | GO:0062023 | collagen-containing extracellular matrix | 17/474 | 396/28804 | 0.000344859 | 0.005172175 | 0.003897692 | Ntng1/Adamts15/Adamts2/Angpt1/Sparc/Itih3/Vwc2/Col9a2/Timp2/Ache/Frem3/Bmp1/Wnt2/Col11a2/Col6a5/Ltbp2/Timp1 | 17 |
| GO:0030016 | CC | GO:0030016 | myofibril | 12/474 | 223/28804 | 0.000352648 | 0.005172175 | 0.003897692 | Atp2a1/Tnnt1/Ahnak2/Actn3/Hspb1/Pygm/Ank1/Asb2/Synpo2/Tmod1/Jph1/Ryr1 | 12 |
| GO:0098858 | CC | GO:0098858 | actin-based cell projection | 12/474 | 229/28804 | 0.000447693 | 0.006303511 | 0.004750254 | Foxa1/Fzd9/Kcnn3/Angpt1/Gap43/Calb2/Cubn/Itga3/Kitl/Crb1/Lhfpl5/Lyz2 | 12 |
| GO:0030672 | CC | GO:0030672 | synaptic vesicle membrane | 8/474 | 111/28804 | 0.000510078 | 0.006649903 | 0.00501129 | Slc17a6/Mctp2/Syt9/Rab3c/Unc13c/Vamp1/Tmem163/Gria2 | 8 |
| GO:0099501 | CC | GO:0099501 | exocytic vesicle membrane | 8/474 | 111/28804 | 0.000510078 | 0.006649903 | 0.00501129 | Slc17a6/Mctp2/Syt9/Rab3c/Unc13c/Vamp1/Tmem163/Gria2 | 8 |
| GO:0043292 | CC | GO:0043292 | contractile fiber | 12/474 | 236/28804 | 0.000585039 | 0.007354776 | 0.005542475 | Atp2a1/Tnnt1/Ahnak2/Actn3/Hspb1/Pygm/Ank1/Asb2/Synpo2/Tmod1/Jph1/Ryr1 | 12 |
| GO:0150034 | CC | GO:0150034 | distal axon | 16/474 | 379/28804 | 0.000610772 | 0.007413514 | 0.005586739 | Dpysl3/Hcn4/Calca/Prph/L1cam/Calb2/Kcnc2/Unc13c/Hcn3/Casr/Itga3/Grm4/Timp2/Cckar/Pdyn/Gria2 | 16 |
| GO:0099056 | CC | GO:0099056 | integral component of presynaptic membrane | 8/474 | 116/28804 | 0.000683571 | 0.00802057 | 0.006044209 | Adcy8/Cntnap4/Oprm1/Slc6a11/Chrna4/Grm4/Kcnh1/Gria2 | 8 |
| GO:0034705 | CC | GO:0034705 | potassium channel complex | 7/474 | 90/28804 | 0.000721236 | 0.008189518 | 0.006171527 | Hcn4/Kcnj5/Kcnc2/Kcng4/Hcn3/Lrrc26/Kcnh1 | 7 |
| GO:0008328 | CC | GO:0008328 | ionotropic glutamate receptor complex | 5/474 | 44/28804 | 0.000756238 | 0.008318618 | 0.006268815 | Grin3a/Vwc2l/Grin2d/Vwc2/Gria2 | 5 |
| GO:0098878 | CC | GO:0098878 | neurotransmitter receptor complex | 5/474 | 46/28804 | 0.000929178 | 0.009911228 | 0.007468988 | Grin3a/Vwc2l/Grin2d/Vwc2/Gria2 | 5 |
| GO:0032589 | CC | GO:0032589 | neuron projection membrane | 6/474 | 71/28804 | 0.001116851 | 0.011562695 | 0.008713514 | Tacr3/Oprm1/Kcnc2/Ank1/Kcnh1/Itga8 | 6 |
| GO:0016528 | CC | GO:0016528 | sarcoplasm | 7/474 | 98/28804 | 0.001193874 | 0.011980588 | 0.009028433 | Atp2a1/Xdh/Pygm/Ank1/Srl/Jph1/Ryr1 | 7 |
| GO:0070382 | CC | GO:0070382 | exocytic vesicle | 12/474 | 257/28804 | 0.001225287 | 0.011980588 | 0.009028433 | Dpysl3/Slc17a6/Mctp2/Syt9/Rab3c/Unc13c/Clcn5/Vamp1/Shh/Tmem163/Pdyn/Gria2 | 12 |
| GO:0031594 | CC | GO:0031594 | neuromuscular junction | 7/474 | 99/28804 | 0.001266859 | 0.012052279 | 0.009082459 | Kcnn3/Camk2d/F2r/Unc13c/Vamp1/Ache/Itga7 | 7 |
| GO:0008021 | CC | GO:0008021 | synaptic vesicle | 11/474 | 234/28804 | 0.001831122 | 0.016912632 | 0.012745165 | Slc17a6/Mctp2/Syt9/Rab3c/Unc13c/Clcn5/Vamp1/Shh/Tmem163/Pdyn/Gria2 | 11 |
| GO:0030133 | CC | GO:0030133 | transport vesicle | 14/474 | 346/28804 | 0.001944842 | 0.016912632 | 0.012745165 | Dpysl3/Slc17a6/Mctp2/Nrsn2/Syt9/Rab3c/Unc13c/Clcn5/Vamp1/Shh/Tmem163/Lyz2/Pdyn/Gria2 | 14 |
| GO:0005769 | CC | GO:0005769 | early endosome | 14/474 | 348/28804 | 0.002050317 | 0.016912632 | 0.012745165 | Ret/Slc17a6/Dtx3l/Snx31/F2r/H2-Q2/Clcn5/Snx8/Rab38/Cd274/Tmem163/Kcnh1/Meltf/Pla2g4e | 14 |
| GO:0099634 | CC | GO:0099634 | postsynaptic specialization membrane | 8/474 | 138/28804 | 0.002089828 | 0.016912632 | 0.012745165 | Grin3a/Chrna3/Glra3/Chrna4/Grin2d/Hspb1/Epha7/Gria2 | 8 |
| GO:0099060 | CC | GO:0099060 | integral component of postsynaptic specialization membrane | 7/474 | 108/28804 | 0.002092365 | 0.016912632 | 0.012745165 | Grin3a/Chrna3/Glra3/Chrna4/Grin2d/Epha7/Gria2 | 7 |
| GO:0099055 | CC | GO:0099055 | integral component of postsynaptic membrane | 9/474 | 170/28804 | 0.002102493 | 0.016912632 | 0.012745165 | Grin3a/Chrna3/Glra3/Oprm1/Slc6a11/Chrna4/Grin2d/Epha7/Gria2 | 9 |
| GO:0098691 | CC | GO:0098691 | dopaminergic synapse | 3/474 | 16/28804 | 0.002114079 | 0.016912632 | 0.012745165 | Chrna3/Chrna4/Chrnb3 | 3 |
| GO:0098563 | CC | GO:0098563 | intrinsic component of synaptic vesicle membrane | 5/474 | 56/28804 | 0.002264118 | 0.017381403 | 0.013098426 | Slc17a6/Syt9/Rab3c/Vamp1/Tmem163 | 5 |
| GO:0008305 | CC | GO:0008305 | integrin complex | 4/474 | 34/28804 | 0.002271433 | 0.017381403 | 0.013098426 | Itga3/Itga7/Itga5/Itga8 | 4 |
| GO:0005892 | CC | GO:0005892 | acetylcholine-gated channel complex | 3/474 | 17/28804 | 0.002535943 | 0.018596918 | 0.014014424 | Chrna3/Chrna4/Chrnb3 | 3 |
| GO:0031527 | CC | GO:0031527 | filopodium membrane | 3/474 | 17/28804 | 0.002535943 | 0.018596918 | 0.014014424 | Fzd9/Gap43/Itga3 | 3 |
| GO:0099572 | CC | GO:0099572 | postsynaptic specialization | 16/474 | 438/28804 | 0.002693104 | 0.019346382 | 0.014579211 | Adcy8/Grin3a/Chrna3/Glra3/Chrna4/Gap43/Adgra1/Nefh/Grin2d/Hspb1/Samd14/Dnm3/Epha7/Pdzd2/Gria2/Itga8 | 16 |
| GO:0098948 | CC | GO:0098948 | intrinsic component of postsynaptic specialization membrane | 7/474 | 114/28804 | 0.002839808 | 0.019992247 | 0.015065928 | Grin3a/Chrna3/Glra3/Chrna4/Grin2d/Epha7/Gria2 | 7 |
| GO:0098685 | CC | GO:0098685 | Schaffer collateral - CA1 synapse | 7/474 | 115/28804 | 0.002982029 | 0.020581848 | 0.015510244 | Adcy8/Ntng1/L1cam/Nefh/Akap12/Epha7/Gria2 | 7 |
| GO:0098936 | CC | GO:0098936 | intrinsic component of postsynaptic membrane | 9/474 | 180/28804 | 0.003086337 | 0.020892129 | 0.015744069 | Grin3a/Chrna3/Glra3/Oprm1/Slc6a11/Chrna4/Grin2d/Epha7/Gria2 | 9 |
| GO:0030658 | CC | GO:0030658 | transport vesicle membrane | 8/474 | 151/28804 | 0.003639413 | 0.024171193 | 0.018215133 | Slc17a6/Mctp2/Syt9/Rab3c/Unc13c/Vamp1/Tmem163/Gria2 | 8 |
| GO:0005604 | CC | GO:0005604 | basement membrane | 7/474 | 120/28804 | 0.003776565 | 0.024617612 | 0.018551549 | Ntng1/Sparc/Vwc2/Timp2/Ache/Frem3/Timp1 | 7 |
| GO:0030673 | CC | GO:0030673 | axolemma | 3/474 | 20/28804 | 0.004098782 | 0.026232203 | 0.019768287 | Kcnc2/Ank1/Kcnh1 | 3 |
| GO:0030285 | CC | GO:0030285 | integral component of synaptic vesicle membrane | 4/474 | 42/28804 | 0.004944711 | 0.031081038 | 0.023422313 | Slc17a6/Syt9/Vamp1/Tmem163 | 4 |
| GO:0005865 | CC | GO:0005865 | striated muscle thin filament | 3/474 | 23/28804 | 0.006139436 | 0.037260025 | 0.028078727 | Tnnt1/Actn3/Tmod1 | 3 |
| GO:0033017 | CC | GO:0033017 | sarcoplasmic reticulum membrane | 3/474 | 23/28804 | 0.006139436 | 0.037260025 | 0.028078727 | Atp2a1/Jph1/Ryr1 | 3 |
| GO:0098984 | CC | GO:0098984 | neuron to neuron synapse | 15/474 | 437/28804 | 0.006322964 | 0.037723444 | 0.028427954 | Adcy8/Grin3a/Chrna3/Gap43/Syt9/Adgra1/Nefh/Grin2d/Hspb1/Samd14/Dnm3/Epha7/Pdzd2/Gria2/Itga8 | 15 |
| GO:0014069 | CC | GO:0014069 | postsynaptic density | 14/474 | 398/28804 | 0.006668452 | 0.039121584 | 0.029481576 | Adcy8/Grin3a/Chrna3/Gap43/Adgra1/Nefh/Grin2d/Hspb1/Samd14/Dnm3/Epha7/Pdzd2/Gria2/Itga8 | 14 |
| GO:0031253 | CC | GO:0031253 | cell projection membrane | 12/474 | 320/28804 | 0.007164218 | 0.041341062 | 0.03115415 | Fzd9/Prph/Tacr3/Oprm1/Gap43/Cubn/Kcnc2/Itga3/Ank1/Kcnh1/Itga5/Itga8 | 12 |
| GO:0045177 | CC | GO:0045177 | apical part of cell | 16/474 | 488/28804 | 0.007468924 | 0.042404215 | 0.031955329 | Adcy8/Amotl1/Patj/Slc22a4/Cubn/Kcnc2/Casr/Slc7a13/Clcn5/Crb1/Lhfpl5/Nox4/Cyp4a10/Pdzd2/Slc2a9/Itga8 | 16 |
| GO:0032279 | CC | GO:0032279 | asymmetric synapse | 14/474 | 406/28804 | 0.007874124 | 0.043995107 | 0.033154207 | Adcy8/Grin3a/Chrna3/Gap43/Adgra1/Nefh/Grin2d/Hspb1/Samd14/Dnm3/Epha7/Pdzd2/Gria2/Itga8 | 14 |
| GO:0031901 | CC | GO:0031901 | early endosome membrane | 6/474 | 106/28804 | 0.008241531 | 0.045328422 | 0.034158978 | H2-Q2/Snx8/Cd274/Tmem163/Kcnh1/Pla2g4e | 6 |
| GO:0098686 | CC | GO:0098686 | hippocampal mossy fiber to CA3 synapse | 4/474 | 49/28804 | 0.008555423 | 0.046330906 | 0.034914439 | Adcy8/Syt9/Grin2d/Epha7 | 4 |
| GO:0032590 | CC | GO:0032590 | dendrite membrane | 4/474 | 50/28804 | 0.00918102 | 0.048699471 | 0.036699362 | Tacr3/Oprm1/Kcnc2/Itga8 | 4 |
| GO:0010008 | CC | GO:0010008 | endosome membrane | 11/474 | 291/28804 | 0.009269502 | 0.048699471 | 0.036699362 | Ret/Mreg/Baiap3/Tyrp1/H2-Q2/Snx8/Ubap1l/Cd274/Tmem163/Kcnh1/Pla2g4e | 11 |
| GO:0043204 | CC | GO:0043204 | perikaryon | 7/474 | 143/28804 | 0.009645638 | 0.049280286 | 0.037137058 | Oprm1/Nefh/Kcnc2/Resp18/Hspb1/Gria2/Itga8 | 7 |
| GO:0036379 | CC | GO:0036379 | myofilament | 3/474 | 27/28804 | 0.009660056 | 0.049280286 | 0.037137058 | Tnnt1/Actn3/Tmod1 | 3 |
| GO:0032281 | CC | GO:0032281 | AMPA glutamate receptor complex | 3/474 | 29/28804 | 0.011779365 | 0.059233376 | 0.044637592 | Vwc2l/Vwc2/Gria2 | 3 |
| GO:0005788 | CC | GO:0005788 | endoplasmic reticulum lumen | 5/474 | 85/28804 | 0.013218716 | 0.065391599 | 0.049278358 | Resp18/Ache/Wnt3/Edn1/Lyz2 | 5 |
| GO:0005833 | CC | GO:0005833 | hemoglobin complex | 2/474 | 11/28804 | 0.013471292 | 0.065391599 | 0.049278358 | Hbb-bt/Hba-a1 | 2 |
| GO:0098636 | CC | GO:0098636 | protein complex involved in cell adhesion | 4/474 | 56/28804 | 0.013561326 | 0.065391599 | 0.049278358 | Itga3/Itga7/Itga5/Itga8 | 4 |
| GO:0031256 | CC | GO:0031256 | leading edge membrane | 7/474 | 156/28804 | 0.015013141 | 0.071413858 | 0.053816663 | Tacr3/Oprm1/Kcnc2/Ank1/Kcnh1/Itga5/Itga8 | 7 |
| GO:0005883 | CC | GO:0005883 | neurofilament | 2/474 | 12/28804 | 0.015991112 | 0.0740641 | 0.055813855 | Prph/Nefh | 2 |
| GO:0031838 | CC | GO:0031838 | haptoglobin-hemoglobin complex | 2/474 | 12/28804 | 0.015991112 | 0.0740641 | 0.055813855 | Hbb-bt/Hba-a1 | 2 |
| GO:0044327 | CC | GO:0044327 | dendritic spine head | 2/474 | 13/28804 | 0.018694944 | 0.084366926 | 0.063577947 | Dnm3/Ppp1r1b | 2 |
| GO:1990907 | CC | GO:1990907 | beta-catenin-TCF complex | 2/474 | 13/28804 | 0.018694944 | 0.084366926 | 0.063577947 | Tcf7l2/Lef1 | 2 |
| GO:0008180 | CC | GO:0008180 | COP9 signalosome | 3/474 | 35/28804 | 0.019627874 | 0.085296442 | 0.064278419 | Amotl1/Wdr6/Tmod1 | 3 |
| GO:0042470 | CC | GO:0042470 | melanosome | 3/474 | 35/28804 | 0.019627874 | 0.085296442 | 0.064278419 | Mreg/Tyrp1/Rab38 | 3 |
| GO:0048770 | CC | GO:0048770 | pigment granule | 3/474 | 35/28804 | 0.019627874 | 0.085296442 | 0.064278419 | Mreg/Tyrp1/Rab38 | 3 |
| GO:0042383 | CC | GO:0042383 | sarcolemma | 7/474 | 166/28804 | 0.020384826 | 0.087505593 | 0.06594321 | Oprm1/Camk2d/Kcnj5/Kcnj12/Ank1/Itga7/Ryr1 | 7 |
| GO:0030175 | CC | GO:0030175 | filopodium | 5/474 | 99/28804 | 0.023970004 | 0.099560895 | 0.075027947 | Fzd9/Kcnn3/Gap43/Itga3/Kitl | 5 |
| GO:0098839 | CC | GO:0098839 | postsynaptic density membrane | 5/474 | 99/28804 | 0.023970004 | 0.099560895 | 0.075027947 | Grin3a/Grin2d/Hspb1/Epha7/Gria2 | 5 |
| GO:0031672 | CC | GO:0031672 | A band | 3/474 | 38/28804 | 0.024404437 | 0.099560895 | 0.075027947 | Atp2a1/Hspb1/Ank1 | 3 |
| GO:0032809 | CC | GO:0032809 | neuronal cell body membrane | 3/474 | 38/28804 | 0.024404437 | 0.099560895 | 0.075027947 | Adcy8/Tacr3/Kcnc2 | 3 |
| GO:0019005 | CC | GO:0019005 | SCF ubiquitin ligase complex | 4/474 | 67/28804 | 0.02460738 | 0.099560895 | 0.075027947 | Fbxl21/Spsb4/Trim21/Fbxo48 | 4 |
| GO:0098981 | CC | GO:0098981 | cholinergic synapse | 2/474 | 16/28804 | 0.02784423 | 0.111376919 | 0.083932367 | Chrna3/Chrna4 | 2 |
| GO:0030315 | CC | GO:0030315 | T-tubule | 4/474 | 70/28804 | 0.02833982 | 0.11208558 | 0.084466406 | Camk2d/Kcnj5/Kcnj12/Ryr1 | 4 |
| GO:0044298 | CC | GO:0044298 | cell body membrane | 3/474 | 41/28804 | 0.029750946 | 0.115711476 | 0.087198839 | Adcy8/Tacr3/Kcnc2 | 3 |
| GO:0005902 | CC | GO:0005902 | microvillus | 5/474 | 105/28804 | 0.029914046 | 0.115711476 | 0.087198839 | Foxa1/Angpt1/Cubn/Crb1/Lyz2 | 5 |
| GO:0099061 | CC | GO:0099061 | integral component of postsynaptic density membrane | 4/474 | 74/28804 | 0.033812706 | 0.128626862 | 0.096931726 | Grin3a/Grin2d/Epha7/Gria2 | 4 |
| GO:0030055 | CC | GO:0030055 | cell-substrate junction | 7/474 | 185/28804 | 0.034018359 | 0.128626862 | 0.096931726 | Oprm1/Arhgap24/Actn3/Synpo2/Nox4/Itga7/Itga5 | 7 |
| GO:0098982 | CC | GO:0098982 | GABA-ergic synapse | 5/474 | 109/28804 | 0.034349219 | 0.128626862 | 0.096931726 | Cbln4/Cntnap4/Slc6a11/Gap43/Baiap3 | 5 |
| GO:0031430 | CC | GO:0031430 | M band | 2/474 | 19/28804 | 0.038417995 | 0.140865982 | 0.106154986 | Hspb1/Ank1 | 2 |
| GO:0043083 | CC | GO:0043083 | synaptic cleft | 2/474 | 19/28804 | 0.038417995 | 0.140865982 | 0.106154986 | Cbln1/Dnm3 | 2 |
| GO:0031252 | CC | GO:0031252 | cell leading edge | 12/474 | 409/28804 | 0.039596446 | 0.143690197 | 0.108283282 | Dpysl3/Tacr3/Amotl1/Oprm1/Kcnc2/Kitl/Cit/Gdpd2/Ank1/Kcnh1/Itga5/Itga8 | 12 |
| GO:0044292 | CC | GO:0044292 | dendrite terminus | 2/474 | 20/28804 | 0.042231241 | 0.151687723 | 0.114310126 | L1cam/Gpr179 | 2 |
| GO:0099146 | CC | GO:0099146 | intrinsic component of postsynaptic density membrane | 4/474 | 80/28804 | 0.043097288 | 0.153234803 | 0.115475988 | Grin3a/Grin2d/Epha7/Gria2 | 4 |
| GO:0016324 | CC | GO:0016324 | apical plasma membrane | 11/474 | 370/28804 | 0.043893522 | 0.154505199 | 0.116433343 | Adcy8/Amotl1/Slc22a4/Cubn/Kcnc2/Casr/Slc7a13/Lhfpl5/Nox4/Cyp4a10/Slc2a9 | 11 |
| GO:0022843 | MF | GO:0022843 | voltage-gated cation channel activity | 16/474 | 150/28404 | 4.98E-09 | 2.03E-06 | 1.70E-06 | Hcn4/Grin3a/Kcnj16/Oprm1/Kcnn3/Kcnj5/Grin2d/Kcnc2/Kcng4/Kcnj12/Hcn3/Kcnt2/Lrrc26/Kcnh1/Ryr1/Kcnh7 | 16 |
| GO:0022836 | MF | GO:0022836 | gated channel activity | 23/474 | 328/28404 | 9.11E-09 | 2.03E-06 | 1.70E-06 | Hcn4/Grin3a/Chrna3/Glra3/Kcnj16/Oprm1/Kcnn3/Chrna4/Gabrq/Kcnj5/Chrnb3/Grin2d/Kcnc2/Kcng4/Kcnj12/Hcn3/Clcn5/Kcnt2/Lrrc26/Kcnh1/Ryr1/Kcnh7/Gria2 | 23 |
| GO:0015276 | MF | GO:0015276 | ligand-gated ion channel activity | 15/474 | 137/28404 | 1.05E-08 | 2.03E-06 | 1.70E-06 | Hcn4/Grin3a/Chrna3/Glra3/Kcnj16/Kcnn3/Chrna4/Gabrq/Kcnj5/Chrnb3/Grin2d/Kcnj12/Ryr1/Kcnh7/Gria2 | 15 |
| GO:0022834 | MF | GO:0022834 | ligand-gated channel activity | 15/474 | 139/28404 | 1.28E-08 | 2.03E-06 | 1.70E-06 | Hcn4/Grin3a/Chrna3/Glra3/Kcnj16/Kcnn3/Chrna4/Gabrq/Kcnj5/Chrnb3/Grin2d/Kcnj12/Ryr1/Kcnh7/Gria2 | 15 |
| GO:0099094 | MF | GO:0099094 | ligand-gated cation channel activity | 13/474 | 104/28404 | 2.04E-08 | 2.58E-06 | 2.16E-06 | Hcn4/Grin3a/Chrna3/Kcnj16/Kcnn3/Chrna4/Kcnj5/Chrnb3/Grin2d/Kcnj12/Ryr1/Kcnh7/Gria2 | 13 |
| GO:0005244 | MF | GO:0005244 | voltage-gated ion channel activity | 17/474 | 197/28404 | 4.05E-08 | 3.75E-06 | 3.14E-06 | Hcn4/Grin3a/Kcnj16/Oprm1/Kcnn3/Kcnj5/Grin2d/Kcnc2/Kcng4/Kcnj12/Hcn3/Clcn5/Kcnt2/Lrrc26/Kcnh1/Ryr1/Kcnh7 | 17 |
| GO:0022832 | MF | GO:0022832 | voltage-gated channel activity | 17/474 | 198/28404 | 4.36E-08 | 3.75E-06 | 3.14E-06 | Hcn4/Grin3a/Kcnj16/Oprm1/Kcnn3/Kcnj5/Grin2d/Kcnc2/Kcng4/Kcnj12/Hcn3/Clcn5/Kcnt2/Lrrc26/Kcnh1/Ryr1/Kcnh7 | 17 |
| GO:0042165 | MF | GO:0042165 | neurotransmitter binding | 7/474 | 22/28404 | 4.74E-08 | 3.75E-06 | 3.14E-06 | Grin3a/Chrna3/Slc6a11/Chrna4/Chrnb3/Grin2d/Ache | 7 |
| GO:0005249 | MF | GO:0005249 | voltage-gated potassium channel activity | 12/474 | 95/28404 | 6.34E-08 | 4.46E-06 | 3.74E-06 | Hcn4/Kcnj16/Kcnn3/Kcnj5/Kcnc2/Kcng4/Kcnj12/Hcn3/Kcnt2/Lrrc26/Kcnh1/Kcnh7 | 12 |
| GO:0005267 | MF | GO:0005267 | potassium channel activity | 13/474 | 121/28404 | 1.26E-07 | 8.00E-06 | 6.70E-06 | Hcn4/Kcnj16/Kcnn3/Kcnj5/Kcnc2/Kcng4/Kcnj12/Hcn3/Kcnt2/Lrrc26/Kcnh1/Kcnh7/Gria2 | 13 |
| GO:0005216 | MF | GO:0005216 | ion channel activity | 24/474 | 439/28404 | 4.64E-07 | 2.67E-05 | 2.24E-05 | Hcn4/Grin3a/Chrna3/Glra3/Kcnj16/Oprm1/Kcnn3/Chrna4/Gabrq/Kcnj5/Chrnb3/Grin2d/Ano5/Kcnc2/Kcng4/Kcnj12/Hcn3/Clcn5/Kcnt2/Lrrc26/Kcnh1/Ryr1/Kcnh7/Gria2 | 24 |
| GO:0005261 | MF | GO:0005261 | cation channel activity | 20/474 | 334/28404 | 1.05E-06 | 5.53E-05 | 4.63E-05 | Hcn4/Grin3a/Chrna3/Kcnj16/Oprm1/Kcnn3/Chrna4/Kcnj5/Chrnb3/Grin2d/Kcnc2/Kcng4/Kcnj12/Hcn3/Kcnt2/Lrrc26/Kcnh1/Ryr1/Kcnh7/Gria2 | 20 |
| GO:0001653 | MF | GO:0001653 | peptide receptor activity | 13/474 | 153/28404 | 1.90E-06 | 9.26E-05 | 7.76E-05 | Gpr165/Vipr2/Tacr3/Gucy2c/Oprm1/Npsr1/Gpr139/Gal/Ccr10/F2r/Qrfpr/Ramp3/Cckar | 13 |
| GO:0015267 | MF | GO:0015267 | channel activity | 24/474 | 483/28404 | 2.48E-06 | 0.000100412 | 8.42E-05 | Hcn4/Grin3a/Chrna3/Glra3/Kcnj16/Oprm1/Kcnn3/Chrna4/Gabrq/Kcnj5/Chrnb3/Grin2d/Ano5/Kcnc2/Kcng4/Kcnj12/Hcn3/Clcn5/Kcnt2/Lrrc26/Kcnh1/Ryr1/Kcnh7/Gria2 | 24 |
| GO:0022803 | MF | GO:0022803 | passive transmembrane transporter activity | 24/474 | 483/28404 | 2.48E-06 | 0.000100412 | 8.42E-05 | Hcn4/Grin3a/Chrna3/Glra3/Kcnj16/Oprm1/Kcnn3/Chrna4/Gabrq/Kcnj5/Chrnb3/Grin2d/Ano5/Kcnc2/Kcng4/Kcnj12/Hcn3/Clcn5/Kcnt2/Lrrc26/Kcnh1/Ryr1/Kcnh7/Gria2 | 24 |
| GO:0015079 | MF | GO:0015079 | potassium ion transmembrane transporter activity | 13/474 | 157/28404 | 2.54E-06 | 0.000100412 | 8.42E-05 | Hcn4/Kcnj16/Kcnn3/Kcnj5/Kcnc2/Kcng4/Kcnj12/Hcn3/Kcnt2/Lrrc26/Kcnh1/Kcnh7/Gria2 | 13 |
| GO:0008188 | MF | GO:0008188 | neuropeptide receptor activity | 7/474 | 42/28404 | 5.61E-06 | 0.000209035 | 0.000175195 | Gpr165/Tacr3/Oprm1/Npsr1/Gpr139/Gal/Qrfpr | 7 |
| GO:1904315 | MF | GO:1904315 | transmitter-gated ion channel activity involved in regulation of postsynaptic membrane potential | 8/474 | 59/28404 | 5.96E-06 | 0.000209732 | 0.000175779 | Grin3a/Chrna3/Glra3/Chrna4/Gabrq/Chrnb3/Grin2d/Gria2 | 8 |
| GO:0008528 | MF | GO:0008528 | G protein-coupled peptide receptor activity | 12/474 | 146/28404 | 6.64E-06 | 0.000221246 | 0.00018543 | Gpr165/Vipr2/Tacr3/Oprm1/Npsr1/Gpr139/Gal/Ccr10/F2r/Qrfpr/Ramp3/Cckar | 12 |
| GO:0017147 | MF | GO:0017147 | Wnt-protein binding | 6/474 | 29/28404 | 7.18E-06 | 0.000221341 | 0.000185509 | Fzd10/Fzd9/Ror2/Sfrp2/Fzd1/Wif1 | 6 |
| GO:0022824 | MF | GO:0022824 | transmitter-gated ion channel activity | 8/474 | 61/28404 | 7.69E-06 | 0.000221341 | 0.000185509 | Grin3a/Chrna3/Glra3/Chrna4/Gabrq/Chrnb3/Grin2d/Gria2 | 8 |
| GO:0022835 | MF | GO:0022835 | transmitter-gated channel activity | 8/474 | 61/28404 | 7.69E-06 | 0.000221341 | 0.000185509 | Grin3a/Chrna3/Glra3/Chrna4/Gabrq/Chrnb3/Grin2d/Gria2 | 8 |
| GO:0001664 | MF | GO:0001664 | G protein-coupled receptor binding | 18/474 | 320/28404 | 8.56E-06 | 0.000229586 | 0.000192419 | Calca/Cxcl10/Gal/Agt/Wnt9b/Ror2/Necab2/Fzd1/Dnm3/Wnt3/Mrap2/Cxcl9/Edn1/Wnt2/Ccl5/Arr3/Pdyn/Ppp1r1b | 18 |
| GO:0099529 | MF | GO:0099529 | neurotransmitter receptor activity involved in regulation of postsynaptic membrane potential | 8/474 | 62/28404 | 8.70E-06 | 0.000229586 | 0.000192419 | Grin3a/Chrna3/Glra3/Chrna4/Gabrq/Chrnb3/Grin2d/Gria2 | 8 |
| GO:0005230 | MF | GO:0005230 | extracellular ligand-gated ion channel activity | 8/474 | 71/28404 | 2.40E-05 | 0.000608401 | 0.00050991 | Grin3a/Chrna3/Glra3/Chrna4/Gabrq/Chrnb3/Grin2d/Gria2 | 8 |
| GO:0005242 | MF | GO:0005242 | inward rectifier potassium channel activity | 5/474 | 23/28404 | 3.33E-05 | 0.000799103 | 0.000669739 | Kcnj16/Kcnn3/Kcnj5/Kcnj12/Kcnh7 | 5 |
| GO:0042166 | MF | GO:0042166 | acetylcholine binding | 4/474 | 12/28404 | 3.41E-05 | 0.000799103 | 0.000669739 | Chrna3/Chrna4/Chrnb3/Ache | 4 |
| GO:0098960 | MF | GO:0098960 | postsynaptic neurotransmitter receptor activity | 8/474 | 76/28404 | 3.96E-05 | 0.000895276 | 0.000750344 | Grin3a/Chrna3/Glra3/Chrna4/Gabrq/Chrnb3/Grin2d/Gria2 | 8 |
| GO:0050840 | MF | GO:0050840 | extracellular matrix binding | 7/474 | 57/28404 | 4.44E-05 | 0.000968111 | 0.000811387 | Adamts15/Sparc/Itga3/Ache/Shh/Plekha2/Itga7 | 7 |
| GO:0046873 | MF | GO:0046873 | metal ion transmembrane transporter activity | 19/474 | 422/28404 | 0.000102071 | 0.002134126 | 0.001788642 | Atp2a1/Hcn4/Grin3a/Kcnj16/Oprm1/Kcnn3/Slc6a11/Kcnj5/Grin2d/Kcnc2/Kcng4/Kcnj12/Hcn3/Kcnt2/Lrrc26/Kcnh1/Ryr1/Kcnh7/Gria2 | 19 |
| GO:0030594 | MF | GO:0030594 | neurotransmitter receptor activity | 9/474 | 111/28404 | 0.000104515 | 0.002134126 | 0.001788642 | Grin3a/Chrna3/Glra3/Chrna4/Gabrq/Chrnb3/Grin2d/Htr7/Gria2 | 9 |
| GO:0043236 | MF | GO:0043236 | laminin binding | 5/474 | 29/28404 | 0.000108093 | 0.002138216 | 0.001792069 | Itga3/Ache/Shh/Plekha2/Itga7 | 5 |
| GO:0005125 | MF | GO:0005125 | cytokine activity | 13/474 | 228/28404 | 0.000131238 | 0.002517385 | 0.002109856 | Cxcl10/Grem2/Wnt9b/Kitl/Tnfsf10/Wnt3/Cxcl9/Inhba/Bmp1/Edn1/Wnt2/Ccl5/Timp1 | 13 |
| GO:0030165 | MF | GO:0030165 | PDZ domain binding | 9/474 | 122/28404 | 0.000214784 | 0.003998778 | 0.003351432 | Cntnap4/L1cam/Slc22a4/Kcnj12/Cit/Fzd1/Cxxc4/Plekha2/Gria2 | 9 |
| GO:0005231 | MF | GO:0005231 | excitatory extracellular ligand-gated ion channel activity | 6/474 | 57/28404 | 0.000369595 | 0.006684382 | 0.005602276 | Chrna3/Glra3/Chrna4/Gabrq/Chrnb3/Gria2 | 6 |
| GO:0005516 | MF | GO:0005516 | calmodulin binding | 11/474 | 191/28404 | 0.000390237 | 0.006861671 | 0.005750864 | Adcy8/Kcnn3/Camk2d/Gap43/Rit2/Akap12/Unc13c/Grm4/Esrrg/Kcnh1/Ryr1 | 11 |
| GO:0005109 | MF | GO:0005109 | frizzled binding | 5/474 | 41/28404 | 0.000578716 | 0.009900744 | 0.008297955 | Wnt9b/Ror2/Fzd1/Wnt3/Wnt2 | 5 |
| GO:0061629 | MF | GO:0061629 | RNA polymerase II-specific DNA-binding transcription factor binding | 16/474 | 376/28404 | 0.000650287 | 0.01083242 | 0.009078805 | Foxa1/Pitx2/Tcf7l2/Gata3/Pou4f1/Dtx3l/Tox2/Gbx2/Nhlh2/Lef1/Tal1/Hspb1/Stat1/Sp100/Esrrb/Parp9 | 16 |
| GO:0004857 | MF | GO:0004857 | enzyme inhibitor activity | 17/474 | 415/28404 | 0.000682894 | 0.0110839 | 0.009289575 | Dtx3l/Agt/Socs1/Itih3/Hspb1/Cit/Serpina3g/Timp2/Serpina3f/Parp9/A2ml1/Camk2n2/Ppp1r1a/Serpinb8/Wfdc17/Timp1/Ppp1r1b | 17 |
| GO:0008066 | MF | GO:0008066 | glutamate receptor activity | 4/474 | 27/28404 | 0.000991112 | 0.01568435 | 0.013145277 | Grin3a/Grin2d/Grm4/Gria2 | 4 |
| GO:0005178 | MF | GO:0005178 | integrin binding | 9/474 | 155/28404 | 0.001223023 | 0.018882279 | 0.015825507 | L1cam/Casr/Itga3/Timp2/Ccn6/Isg15/Itga7/Itga5/Itga8 | 9 |
| GO:0042813 | MF | GO:0042813 | Wnt receptor activity | 3/474 | 15/28404 | 0.001809543 | 0.027272398 | 0.022857386 | Fzd10/Fzd9/Fzd1 | 3 |
| GO:0022848 | MF | GO:0022848 | acetylcholine-gated cation-selective channel activity | 3/474 | 16/28404 | 0.002199703 | 0.031645731 | 0.026522737 | Chrna3/Chrna4/Chrnb3 | 3 |
| GO:0048019 | MF | GO:0048019 | receptor antagonist activity | 3/474 | 16/28404 | 0.002199703 | 0.031645731 | 0.026522737 | Dkk2/Ccl5/Fst | 3 |
| GO:0031005 | MF | GO:0031005 | filamin binding | 3/474 | 17/28404 | 0.002638202 | 0.036411003 | 0.03051658 | Dpysl3/Oprm1/Synpo2 | 3 |
| GO:0042578 | MF | GO:0042578 | phosphoric ester hydrolase activity | 14/474 | 353/28404 | 0.002645981 | 0.036411003 | 0.03051658 | Plch1/Dusp27/Gpld1/Ptpn20/Inpp4b/Ppm1j/Samhd1/Plcxd3/Plpp4/Gdpd2/Ptpn4/Eya2/Sgpp2/Ccl5 | 14 |
| GO:0004714 | MF | GO:0004714 | transmembrane receptor protein tyrosine kinase activity | 5/474 | 59/28404 | 0.003025978 | 0.040754136 | 0.034156621 | Ret/Ror2/Epha8/Insrr/Epha7 | 5 |
| GO:0015464 | MF | GO:0015464 | acetylcholine receptor activity | 3/474 | 18/28404 | 0.003126923 | 0.041236292 | 0.034560724 | Chrna3/Chrna4/Chrnb3 | 3 |
| GO:0044325 | MF | GO:0044325 | transmembrane transporter binding | 8/474 | 148/28404 | 0.003502834 | 0.045250893 | 0.037925418 | Camk2d/Actn3/Kcnc2/Kcng4/Casr/Ank1/Lrrc26/Kcnh1 | 8 |
| GO:0004970 | MF | GO:0004970 | ionotropic glutamate receptor activity | 3/474 | 19/28404 | 0.00366761 | 0.046431942 | 0.038915272 | Grin3a/Grin2d/Gria2 | 3 |
| GO:0043177 | MF | GO:0043177 | organic acid binding | 8/474 | 152/28404 | 0.004116021 | 0.051087079 | 0.042816808 | Grin3a/Glra3/Grin2d/P4ha3/Casr/Hbb-bt/Hba-a1/Crabp1 | 8 |
| GO:1990404 | MF | GO:1990404 | NAD+-protein ADP-ribosyltransferase activity | 3/474 | 21/28404 | 0.004911224 | 0.059784703 | 0.050106411 | Parp14/Parp10/Parp9 | 3 |
| GO:0061135 | MF | GO:0061135 | endopeptidase regulator activity | 10/474 | 232/28404 | 0.005870751 | 0.070116705 | 0.058765809 | Agt/Itih3/Sfrp2/Serpina3g/Timp2/Serpina3f/A2ml1/Serpinb8/Wfdc17/Timp1 | 10 |
| GO:0005539 | MF | GO:0005539 | glycosaminoglycan binding | 10/474 | 233/28404 | 0.006045549 | 0.070867268 | 0.059394867 | Dpysl3/Cxcl10/Grem2/Adamts15/Nell1/Lyve1/Ccn6/Shh/Ccl5/Ltbp2 | 10 |
| GO:0004867 | MF | GO:0004867 | serine-type endopeptidase inhibitor activity | 7/474 | 130/28404 | 0.006282986 | 0.072311457 | 0.060605262 | Agt/Itih3/Serpina3g/Serpina3f/A2ml1/Serpinb8/Wfdc17 | 7 |
| GO:0003950 | MF | GO:0003950 | NAD+ ADP-ribosyltransferase activity | 3/474 | 24/28404 | 0.007202805 | 0.081417424 | 0.068237103 | Parp14/Parp10/Parp9 | 3 |
| GO:0001223 | MF | GO:0001223 | transcription coactivator binding | 4/474 | 48/28404 | 0.008349205 | 0.09272012 | 0.077710053 | Gata3/Rora/Stat1/Cit | 4 |
| GO:0019199 | MF | GO:0019199 | transmembrane receptor protein kinase activity | 5/474 | 77/28404 | 0.0093653 | 0.102210946 | 0.08566445 | Ret/Ror2/Epha8/Insrr/Epha7 | 5 |
| GO:0004866 | MF | GO:0004866 | endopeptidase inhibitor activity | 9/474 | 216/28404 | 0.010752337 | 0.115359821 | 0.096684709 | Agt/Itih3/Serpina3g/Timp2/Serpina3f/A2ml1/Serpinb8/Wfdc17/Timp1 | 9 |
| GO:0043621 | MF | GO:0043621 | protein self-association | 5/474 | 80/28404 | 0.010944871 | 0.115468387 | 0.0967757 | L1cam/Rsad2/Kctd9/Ache/Ccl5 | 5 |
| GO:0070016 | MF | GO:0070016 | armadillo repeat domain binding | 2/474 | 10/28404 | 0.011444295 | 0.117284352 | 0.098297686 | Tcf7l2/Lef1 | 2 |
| GO:0003924 | MF | GO:0003924 | GTPase activity | 11/474 | 296/28404 | 0.011487567 | 0.117284352 | 0.098297686 | Tgtp2/Ifi47/Tgtp1/Gbp6/Rab3c/Rit2/Rab37/Gm4951/Rab38/Dnm3/Irgm2 | 11 |
| GO:0017046 | MF | GO:0017046 | peptide hormone binding | 4/474 | 53/28404 | 0.011775409 | 0.118314826 | 0.099161341 | Vipr2/Gucy2c/Cckar/Inhba | 4 |
| GO:0015108 | MF | GO:0015108 | chloride transmembrane transporter activity | 6/474 | 114/28404 | 0.012311954 | 0.121772923 | 0.102059621 | Glra3/Slc6a11/Gabrq/Ano5/Clcn5/Slc26a10 | 6 |
| GO:0019001 | MF | GO:0019001 | guanyl nucleotide binding | 13/474 | 384/28404 | 0.01308631 | 0.122777577 | 0.102901636 | Tgtp1/Gucy2c/Gbp6/Rab3c/Rit2/Arl4c/Rab37/Samhd1/Prkg2/Rab38/Dnm3/Ciita/Srl | 13 |
| GO:0032561 | MF | GO:0032561 | guanyl ribonucleotide binding | 13/474 | 384/28404 | 0.01308631 | 0.122777577 | 0.102901636 | Tgtp1/Gucy2c/Gbp6/Rab3c/Rit2/Arl4c/Rab37/Samhd1/Prkg2/Rab38/Dnm3/Ciita/Srl | 13 |
| GO:0030414 | MF | GO:0030414 | peptidase inhibitor activity | 9/474 | 224/28404 | 0.013381932 | 0.122777577 | 0.102901636 | Agt/Itih3/Serpina3g/Timp2/Serpina3f/A2ml1/Serpinb8/Wfdc17/Timp1 | 9 |
| GO:0005251 | MF | GO:0005251 | delayed rectifier potassium channel activity | 3/474 | 30/28404 | 0.013423039 | 0.122777577 | 0.102901636 | Kcnc2/Kcng4/Kcnh1 | 3 |
| GO:0004143 | MF | GO:0004143 | diacylglycerol kinase activity | 2/474 | 11/28404 | 0.013834222 | 0.122777577 | 0.102901636 | Dgkk/Dgkh | 2 |
| GO:0031720 | MF | GO:0031720 | haptoglobin binding | 2/474 | 11/28404 | 0.013834222 | 0.122777577 | 0.102901636 | Hbb-bt/Hba-a1 | 2 |
| GO:0097677 | MF | GO:0097677 | STAT family protein binding | 2/474 | 11/28404 | 0.013834222 | 0.122777577 | 0.102901636 | Dtx3l/Parp9 | 2 |
| GO:0003725 | MF | GO:0003725 | double-stranded RNA binding | 5/474 | 85/28404 | 0.013965222 | 0.122777577 | 0.102901636 | Eif2ak2/Adarb1/Oasl1/Oasl2/Ifih1 | 5 |
| GO:0061134 | MF | GO:0061134 | peptidase regulator activity | 10/474 | 266/28404 | 0.014449378 | 0.1234775 | 0.103488252 | Agt/Itih3/Sfrp2/Serpina3g/Timp2/Serpina3f/A2ml1/Serpinb8/Wfdc17/Timp1 | 10 |
| GO:0008081 | MF | GO:0008081 | phosphoric diester hydrolase activity | 5/474 | 86/28404 | 0.014630036 | 0.1234775 | 0.103488252 | Plch1/Gpld1/Plcxd3/Gdpd2/Ccl5 | 5 |
| GO:0015171 | MF | GO:0015171 | amino acid transmembrane transporter activity | 5/474 | 86/28404 | 0.014630036 | 0.1234775 | 0.103488252 | Slc17a6/Slc7a3/Slc6a11/Slc22a4/Slc7a13 | 5 |
| GO:0050839 | MF | GO:0050839 | cell adhesion molecule binding | 11/474 | 308/28404 | 0.015047772 | 0.125332104 | 0.105042621 | Ntng1/L1cam/Cdh20/Casr/Itga3/Timp2/Ccn6/Isg15/Itga7/Itga5/Itga8 | 11 |
| GO:0016757 | MF | GO:0016757 | glycosyltransferase activity | 10/474 | 270/28404 | 0.015875341 | 0.130507675 | 0.109380341 | Has1/Tmtc4/Parp14/Pygm/Parp10/Parp9/B3gat2/B3gnt8/Has3/B4galnt3 | 10 |
| GO:0030492 | MF | GO:0030492 | hemoglobin binding | 2/474 | 12/28404 | 0.016419438 | 0.131563347 | 0.110265115 | Cubn/Hbb-bt | 2 |
| GO:0039706 | MF | GO:0039706 | co-receptor binding | 2/474 | 12/28404 | 0.016419438 | 0.131563347 | 0.110265115 | Dkk2/Wnt9b | 2 |
| GO:0005525 | MF | GO:0005525 | GTP binding | 12/474 | 361/28404 | 0.018989439 | 0.149988099 | 0.125707162 | Tgtp1/Gucy2c/Gbp6/Rab3c/Rit2/Arl4c/Rab37/Samhd1/Rab38/Dnm3/Ciita/Srl | 12 |
| GO:0035256 | MF | GO:0035256 | G protein-coupled glutamate receptor binding | 2/474 | 13/28404 | 0.01919279 | 0.149988099 | 0.125707162 | Necab2/Dnm3 | 2 |
| GO:0004713 | MF | GO:0004713 | protein tyrosine kinase activity | 6/474 | 130/28404 | 0.022112761 | 0.158558846 | 0.132890427 | Ret/Eif2ak2/Ror2/Epha8/Insrr/Epha7 | 6 |
| GO:0005005 | MF | GO:0005005 | transmembrane-ephrin receptor activity | 2/474 | 14/28404 | 0.022147305 | 0.158558846 | 0.132890427 | Epha8/Epha7 | 2 |
| GO:0005344 | MF | GO:0005344 | oxygen carrier activity | 2/474 | 14/28404 | 0.022147305 | 0.158558846 | 0.132890427 | Hbb-bt/Hba-a1 | 2 |
| GO:0008191 | MF | GO:0008191 | metalloendopeptidase inhibitor activity | 2/474 | 14/28404 | 0.022147305 | 0.158558846 | 0.132890427 | Timp2/Timp1 | 2 |
| GO:0016594 | MF | GO:0016594 | glycine binding | 2/474 | 14/28404 | 0.022147305 | 0.158558846 | 0.132890427 | Grin3a/Glra3 | 2 |
| GO:0043560 | MF | GO:0043560 | insulin receptor substrate binding | 2/474 | 14/28404 | 0.022147305 | 0.158558846 | 0.132890427 | Wdr6/Insrr | 2 |
| GO:0017080 | MF | GO:0017080 | sodium channel regulator activity | 3/474 | 37/28404 | 0.02358684 | 0.158558846 | 0.132890427 | Gpld1/Camk2d/Agt | 3 |
| GO:0030547 | MF | GO:0030547 | signaling receptor inhibitor activity | 3/474 | 37/28404 | 0.02358684 | 0.158558846 | 0.132890427 | Dkk2/Ccl5/Fst | 3 |
| GO:0030551 | MF | GO:0030551 | cyclic nucleotide binding | 3/474 | 37/28404 | 0.02358684 | 0.158558846 | 0.132890427 | Hcn4/Prkg2/Hcn3 | 3 |
| GO:0071855 | MF | GO:0071855 | neuropeptide receptor binding | 3/474 | 37/28404 | 0.02358684 | 0.158558846 | 0.132890427 | Gal/Mrap2/Edn1 | 3 |
| GO:0005179 | MF | GO:0005179 | hormone activity | 6/474 | 132/28404 | 0.023624058 | 0.158558846 | 0.132890427 | Calca/Gal/Agt/Inhba/Edn1/Pdyn | 6 |
| GO:0004620 | MF | GO:0004620 | phospholipase activity | 5/474 | 98/28404 | 0.024305887 | 0.158558846 | 0.132890427 | Plch1/Gpld1/Proca1/Ccl5/Pla2g4e | 5 |
| GO:0001221 | MF | GO:0001221 | transcription coregulator binding | 6/474 | 133/28404 | 0.024405038 | 0.158558846 | 0.132890427 | Gata3/Rora/Lef1/Zfp618/Stat1/Cit | 6 |
| GO:0008201 | MF | GO:0008201 | heparin binding | 7/474 | 170/28404 | 0.024432802 | 0.158558846 | 0.132890427 | Cxcl10/Grem2/Adamts15/Nell1/Ccn6/Ccl5/Ltbp2 | 7 |
| GO:0046906 | MF | GO:0046906 | tetrapyrrole binding | 7/474 | 170/28404 | 0.024432802 | 0.158558846 | 0.132890427 | Cubn/Cyp2d9/Hebp2/Cyp4a10/Hbb-bt/Hba-a1/Ido2 | 7 |
| GO:0005523 | MF | GO:0005523 | tropomyosin binding | 2/474 | 15/28404 | 0.025276191 | 0.158558846 | 0.132890427 | Tnnt1/Tmod1 | 2 |
| GO:0042577 | MF | GO:0042577 | lipid phosphatase activity | 2/474 | 15/28404 | 0.025276191 | 0.158558846 | 0.132890427 | Plpp4/Sgpp2 | 2 |
| GO:0045236 | MF | GO:0045236 | CXCR chemokine receptor binding | 2/474 | 15/28404 | 0.025276191 | 0.158558846 | 0.132890427 | Cxcl10/Cxcl9 | 2 |
| GO:0045295 | MF | GO:0045295 | gamma-catenin binding | 2/474 | 15/28404 | 0.025276191 | 0.158558846 | 0.132890427 | Tcf7l2/Lef1 | 2 |
| GO:0030020 | MF | GO:0030020 | extracellular matrix structural constituent conferring tensile strength | 3/474 | 38/28404 | 0.025299279 | 0.158558846 | 0.132890427 | Col9a2/Col11a2/Col6a5 | 3 |
| GO:0035254 | MF | GO:0035254 | glutamate receptor binding | 4/474 | 68/28404 | 0.026989941 | 0.167496399 | 0.140381118 | Necab2/Ptpn4/Dnm3/Gria2 | 4 |
| GO:0016746 | MF | GO:0016746 | acyltransferase activity | 9/474 | 254/28404 | 0.027566129 | 0.169033673 | 0.141669529 | Nat8f6/Gpat2/Mogat1/Zdhhc22/Sptssb/Ciita/Alas2/Oacyl/Pla2g4e | 9 |
| GO:0016597 | MF | GO:0016597 | amino acid binding | 4/474 | 69/28404 | 0.028285733 | 0.169033673 | 0.141669529 | Grin3a/Glra3/Grin2d/Casr | 4 |
| GO:0019210 | MF | GO:0019210 | kinase inhibitor activity | 4/474 | 69/28404 | 0.028285733 | 0.169033673 | 0.141669529 | Socs1/Hspb1/Cit/Camk2n2 | 4 |
| GO:0005003 | MF | GO:0005003 | ephrin receptor activity | 2/474 | 16/28404 | 0.028572833 | 0.169033673 | 0.141669529 | Epha8/Epha7 | 2 |
| GO:0015643 | MF | GO:0015643 | toxic substance binding | 2/474 | 16/28404 | 0.028572833 | 0.169033673 | 0.141669529 | Gucy2c/Nefh | 2 |
| GO:0008009 | MF | GO:0008009 | chemokine activity | 3/474 | 41/28404 | 0.030826676 | 0.17902097 | 0.150040024 | Cxcl10/Cxcl9/Ccl5 | 3 |
| GO:0042056 | MF | GO:0042056 | chemoattractant activity | 3/474 | 41/28404 | 0.030826676 | 0.17902097 | 0.150040024 | Cxcl10/Ccl5/Saa3 | 3 |
| GO:0003707 | MF | GO:0003707 | nuclear steroid receptor activity | 2/474 | 17/28404 | 0.032030783 | 0.184322598 | 0.154483395 | Esrrg/Esrrb | 2 |
| GO:0031406 | MF | GO:0031406 | carboxylic acid binding | 7/474 | 183/28404 | 0.034490151 | 0.196687079 | 0.164846242 | Grin3a/L1cam/Glra3/Grin2d/Fabp7/P4ha3/Crabp1 | 7 |
| GO:0016747 | MF | GO:0016747 | acyltransferase activity, transferring groups other than amino-acyl groups | 8/474 | 225/28404 | 0.035907422 | 0.202941056 | 0.170087789 | Nat8f6/Gpat2/Mogat1/Zdhhc22/Sptssb/Alas2/Oacyl/Pla2g4e | 8 |
| GO:0005272 | MF | GO:0005272 | sodium channel activity | 3/474 | 44/28404 | 0.036934394 | 0.206897979 | 0.173404143 | Hcn4/Hcn3/Gria2 | 3 |
| GO:0051219 | MF | GO:0051219 | phosphoprotein binding | 5/474 | 111/28404 | 0.038606308 | 0.211388025 | 0.177167314 | Dpysl3/Pitx2/Shc3/Grb10/Arr3 | 5 |
| GO:0015103 | MF | GO:0015103 | inorganic anion transmembrane transporter activity | 6/474 | 149/28404 | 0.039305837 | 0.211388025 | 0.177167314 | Glra3/Slc6a11/Gabrq/Ano5/Clcn5/Slc26a10 | 6 |
| GO:0004435 | MF | GO:0004435 | phosphatidylinositol phospholipase C activity | 2/474 | 19/28404 | 0.039405667 | 0.211388025 | 0.177167314 | Plch1/Ccl5 | 2 |
| GO:0004629 | MF | GO:0004629 | phospholipase C activity | 2/474 | 19/28404 | 0.039405667 | 0.211388025 | 0.177167314 | Plch1/Ccl5 | 2 |
| GO:0016411 | MF | GO:0016411 | acylglycerol O-acyltransferase activity | 2/474 | 19/28404 | 0.039405667 | 0.211388025 | 0.177167314 | Gpat2/Mogat1 | 2 |
| GO:0005201 | MF | GO:0005201 | extracellular matrix structural constituent | 6/474 | 150/28404 | 0.040392916 | 0.214863157 | 0.180079872 | Sparc/Col9a2/Col11a2/Col6a5/Tectb/Ltbp2 | 6 |
| GO:0003714 | MF | GO:0003714 | transcription corepressor activity | 7/474 | 191/28404 | 0.041875759 | 0.220894629 | 0.185134935 | Sfmbt2/Smyd1/Parp14/Parp10/Parp9/Kctd1/Rcor2 | 7 |
| GO:0019905 | MF | GO:0019905 | syntaxin binding | 4/474 | 79/28404 | 0.043263538 | 0.222890785 | 0.186807941 | Syt9/Baiap3/Unc13c/Vamp1 | 4 |
| GO:0016500 | MF | GO:0016500 | protein-hormone receptor activity | 2/474 | 20/28404 | 0.043310532 | 0.222890785 | 0.186807941 | Lgr5/Insrr | 2 |
| GO:0099186 | MF | GO:0099186 | structural constituent of postsynapse | 2/474 | 20/28404 | 0.043310532 | 0.222890785 | 0.186807941 | Nefh/Dnm3 | 2 |
| GO:0016758 | MF | GO:0016758 | hexosyltransferase activity | 7/474 | 194/28404 | 0.044890341 | 0.229157952 | 0.192060543 | Has1/Tmtc4/Pygm/B3gat2/B3gnt8/Has3/B4galnt3 | 7 |
| GO:0032813 | MF | GO:0032813 | tumor necrosis factor receptor superfamily binding | 3/474 | 48/28404 | 0.045963908 | 0.232761228 | 0.1950805 | Edaradd/Stat1/Tnfsf10 | 3 |
| GO:0050998 | MF | GO:0050998 | nitric-oxide synthase binding | 2/474 | 21/28404 | 0.047352564 | 0.237890262 | 0.199379217 | Camk2d/Dnm3 | 2 |
| GO:0061630 | MF | GO:0061630 | ubiquitin protein ligase activity | 10/474 | 327/28404 | 0.049054058 | 0.244497787 | 0.204917078 | Trim40/Siah3/Dtx3l/Asb4/Trim30d/Fbxo40/Rnf213/Trim21/Asb2/Hectd2 | 10 |
| GO:0000149 | MF | GO:0000149 | SNARE binding | 5/474 | 119/28404 | 0.049505573 | 0.244820529 | 0.205187572 | Syt9/Baiap3/Unc13c/Vamp1/Gria2 | 5 |
| GO:1901681 | MF | GO:1901681 | sulfur compound binding | 9/474 | 284/28404 | 0.049995316 | 0.244868379 | 0.205227676 | Dpysl3/Cxcl10/Grem2/Adamts15/Nell1/Ccn6/Ccl5/Fst/Ltbp2 | 9 |

**Supplementary Table 4**: Results of KEGG enrichment analysis of intersection genes.

|  | ID | Description | GeneRatio | BgRatio | pvalue | p.adjust | qvalue | geneID | Count |
| --- | --- | --- | --- | --- | --- | --- | --- | --- | --- |
| mmu04916 | mmu04916 | Melanogenesis - Mus musculus (house mouse) | 13/198 | 100/9720 | 1.05E-07 | 1.05E-07 | 2.20E-05 | Adcy8/Fzd10/Fzd9/Tcf7l2/Camk2d/Lef1/Wnt9b/Tyrp1/Kitl/Fzd1/Wnt3/Edn1/Wnt2 | 13 |
| mmu04310 | mmu04310 | Wnt signaling pathway - Mus musculus (house mouse) | 16/198 | 175/9720 | 5.10E-07 | 5.10E-07 | 5.31E-05 | Fzd10/Fzd9/Tcf7l2/Dkk2/Camk2d/Lef1/Wnt9b/Ror2/Sfrp2/Vangl1/Lgr5/Fzd1/Wif1/Cxxc4/Wnt3/Wnt2 | 16 |
| mmu04080 | mmu04080 | Neuroactive ligand-receptor interaction - Mus musculus (house mouse) | 23/198 | 390/9720 | 4.20E-06 | 4.20E-06 | 0.000239972 | Vipr2/Calca/Grin3a/Tacr3/Chrna3/Glra3/Oprm1/Npsr1/Chrna4/Gal/Pgr15l/Gabrq/Agt/Chrnb3/F2r/Grin2d/Qrfpr/Htr7/Grm4/Cckar/Edn1/Pdyn/Gria2 | 23 |
| mmu05217 | mmu05217 | Basal cell carcinoma - Mus musculus (house mouse) | 9/198 | 63/9720 | 4.61E-06 | 4.61E-06 | 0.000239972 | Fzd10/Fzd9/Tcf7l2/Lef1/Wnt9b/Fzd1/Shh/Wnt3/Wnt2 | 9 |
| mmu05165 | mmu05165 | Human papillomavirus infection - Mus musculus (house mouse) | 21/198 | 359/9720 | 1.28E-05 | 1.28E-05 | 0.000533656 | Fzd10/Fzd9/Tcf7l2/Eif2ak2/Patj/Wnt9b/Itga3/H2-Q2/Stat1/Col9a2/Fzd1/Oasl1/H2-T24/Isg15/Wnt3/Oasl2/Itga7/Wnt2/Col6a5/Itga5/Itga8 | 21 |
| mmu05033 | mmu05033 | Nicotine addiction - Mus musculus (house mouse) | 6/198 | 40/9720 | 0.000142721 | 0.000142721 | 0.004957674 | Grin3a/Slc17a6/Chrna4/Gabrq/Grin2d/Gria2 | 6 |
| mmu05412 | mmu05412 | Arrhythmogenic right ventricular cardiomyopathy - Mus musculus (house mouse) | 8/198 | 86/9720 | 0.000350727 | 0.000350727 | 0.009791098 | Atp2a1/Tcf7l2/Lef1/Actn3/Itga3/Itga7/Itga5/Itga8 | 8 |
| mmu04390 | mmu04390 | Hippo signaling pathway - Mus musculus (house mouse) | 11/198 | 158/9720 | 0.00037582 | 0.00037582 | 0.009791098 | Fzd10/Fzd9/Tcf7l2/Rassf6/Patj/Lef1/Wnt9b/Fzd1/Crb1/Wnt3/Wnt2 | 11 |
| mmu04934 | mmu04934 | Cushing syndrome - Mus musculus (house mouse) | 11/198 | 162/9720 | 0.00046522 | 0.00046522 | 0.010773518 | Adcy8/Fzd10/Fzd9/Tcf7l2/Camk2d/Agt/Lef1/Wnt9b/Fzd1/Wnt3/Wnt2 | 11 |
| mmu04072 | mmu04072 | Phospholipase D signaling pathway - Mus musculus (house mouse) | 10/198 | 149/9720 | 0.000919394 | 0.000919394 | 0.018339977 | Adcy8/Dgkk/Agt/Shc3/F2r/Kitl/Grm4/Dnm3/Dgkh/Pla2g4e | 10 |
| mmu05226 | mmu05226 | Gastric cancer - Mus musculus (house mouse) | 10/198 | 150/9720 | 0.000967943 | 0.000967943 | 0.018339977 | Fzd10/Fzd9/Tcf7l2/Shc3/Lef1/Wnt9b/Fzd1/Shh/Wnt3/Wnt2 | 10 |
| mmu05143 | mmu05143 | African trypanosomiasis - Mus musculus (house mouse) | 5/198 | 39/9720 | 0.001093383 | 0.001093383 | 0.018990338 | Hbb-bt/Hba-a2/Hbb-bs/Hba-a1/Ido2 | 5 |
| mmu04024 | mmu04024 | cAMP signaling pathway - Mus musculus (house mouse) | 12/198 | 224/9720 | 0.002083999 | 0.002083999 | 0.033019407 | Adcy8/Atp2a1/Vipr2/Hcn4/Grin3a/Camk2d/F2r/Grin2d/Vav3/Edn1/Gria2/Ppp1r1b | 12 |
| mmu04550 | mmu04550 | Signaling pathways regulating pluripotency of stem cells - Mus musculus (house mouse) | 9/198 | 140/9720 | 0.00221797 | 0.00221797 | 0.033019407 | Fzd10/Fzd9/Zfhx3/Wnt9b/Fzd1/Wnt3/Esrrb/Inhba/Wnt2 | 9 |
| mmu05031 | mmu05031 | Amphetamine addiction - Mus musculus (house mouse) | 6/198 | 69/9720 | 0.002735445 | 0.002735445 | 0.033853543 | Grin3a/Camk2d/Grin2d/Pdyn/Gria2/Ppp1r1b | 6 |
| mmu04820 | mmu04820 | Cytoskeleton in muscle cells - Mus musculus (house mouse) | 12/198 | 232/9720 | 0.00278622 | 0.00278622 | 0.033853543 | Tnnt1/Actn3/Itga3/Col9a2/Synpo2/Inf2/Itga7/Tmod1/Col11a2/Col6a5/Itga5/Itga8 | 12 |
| mmu05030 | mmu05030 | Cocaine addiction - Mus musculus (house mouse) | 5/198 | 48/9720 | 0.002805011 | 0.002805011 | 0.033853543 | Grin3a/Grin2d/Pdyn/Gria2/Ppp1r1b | 5 |
| mmu05205 | mmu05205 | Proteoglycans in cancer - Mus musculus (house mouse) | 11/198 | 204/9720 | 0.00301536 | 0.00301536 | 0.033853543 | Fzd10/Fzd9/Camk2d/Wnt9b/Vav3/Fzd1/Ank1/Shh/Wnt3/Wnt2/Itga5 | 11 |
| mmu05224 | mmu05224 | Breast cancer - Mus musculus (house mouse) | 9/198 | 147/9720 | 0.003086144 | 0.003086144 | 0.033853543 | Fzd10/Fzd9/Tcf7l2/Shc3/Lef1/Wnt9b/Fzd1/Wnt3/Wnt2 | 9 |
| mmu04360 | mmu04360 | Axon guidance - Mus musculus (house mouse) | 10/198 | 181/9720 | 0.003885197 | 0.003885197 | 0.039842703 | Ntng1/L1cam/Camk2d/Dpysl5/Sema4g/Shh/Epha8/Srgap1/Epha7/Robo3 | 10 |
| mmu04713 | mmu04713 | Circadian entrainment - Mus musculus (house mouse) | 7/198 | 99/9720 | 0.004014454 | 0.004014454 | 0.039842703 | Adcy8/Camk2d/Kcnj5/Grin2d/Prkg2/Ryr1/Gria2 | 7 |
| mmu05410 | mmu05410 | Hypertrophic cardiomyopathy - Mus musculus (house mouse) | 7/198 | 100/9720 | 0.00424395 | 0.00424395 | 0.040205838 | Atp2a1/Agt/Itga3/Itga7/Edn1/Itga5/Itga8 | 7 |
| mmu05414 | mmu05414 | Dilated cardiomyopathy - Mus musculus (house mouse) | 7/198 | 103/9720 | 0.004992287 | 0.004992287 | 0.045239026 | Adcy8/Atp2a1/Agt/Itga3/Itga7/Itga5/Itga8 | 7 |
| mmu04020 | mmu04020 | Calcium signaling pathway - Mus musculus (house mouse) | 12/198 | 254/9720 | 0.005752107 | 0.005752107 | 0.049952508 | Adcy8/Atp2a1/Ret/Grin3a/Tacr3/Camk2d/F2r/Grin2d/Htr7/Cckar/Mylk3/Ryr1 | 12 |
| mmu05164 | mmu05164 | Influenza A - Mus musculus (house mouse) | 9/198 | 173/9720 | 0.008853923 | 0.008853923 | 0.066063625 | Cxcl10/Eif2ak2/Rsad2/Stat1/Tnfsf10/Ciita/Ifih1/Ccl5/H2-Ob | 9 |
| mmu04724 | mmu04724 | Glutamatergic synapse - Mus musculus (house mouse) | 7/198 | 115/9720 | 0.009010013 | 0.009010013 | 0.066063625 | Adcy8/Grin3a/Slc17a6/Grin2d/Grm4/Gria2/Pla2g4e | 7 |
| mmu00561 | mmu00561 | Glycerolipid metabolism - Mus musculus (house mouse) | 5/198 | 63/9720 | 0.009013674 | 0.009013674 | 0.066063625 | Dgkk/Gpat2/Mogat1/Plpp4/Dgkh | 5 |
| mmu04270 | mmu04270 | Vascular smooth muscle contraction - Mus musculus (house mouse) | 8/198 | 144/9720 | 0.00916127 | 0.00916127 | 0.066063625 | Adcy8/Calca/Agt/Ramp3/Cyp4a10/Mylk3/Edn1/Pla2g4e | 8 |
| mmu04512 | mmu04512 | ECM-receptor interaction - Mus musculus (house mouse) | 6/198 | 89/9720 | 0.009497383 | 0.009497383 | 0.066063625 | Itga3/Col9a2/Itga7/Col6a5/Itga5/Itga8 | 6 |
| mmu05225 | mmu05225 | Hepatocellular carcinoma - Mus musculus (house mouse) | 9/198 | 175/9720 | 0.009509158 | 0.009509158 | 0.066063625 | Fzd10/Fzd9/Tcf7l2/Shc3/Lef1/Wnt9b/Fzd1/Wnt3/Wnt2 | 9 |
| mmu04720 | mmu04720 | Long-term potentiation - Mus musculus (house mouse) | 5/198 | 67/9720 | 0.011605697 | 0.011605697 | 0.078028117 | Adcy8/Camk2d/Grin2d/Ppp1r1a/Gria2 | 5 |
| mmu00564 | mmu00564 | Glycerophospholipid metabolism - Mus musculus (house mouse) | 6/198 | 98/9720 | 0.014817361 | 0.014817361 | 0.096507811 | Dgkk/Gpat2/Plpp4/Ache/Dgkh/Pla2g4e | 6 |
| mmu04510 | mmu04510 | Focal adhesion - Mus musculus (house mouse) | 9/198 | 202/9720 | 0.02236574 | 0.02236574 | 0.141257303 | Shc3/Vav3/Itga3/Col9a2/Mylk3/Itga7/Col6a5/Itga5/Itga8 | 9 |
| mmu05017 | mmu05017 | Spinocerebellar ataxia - Mus musculus (house mouse) | 7/198 | 141/9720 | 0.025093074 | 0.025093074 | 0.153821323 | Atp2a1/Grin3a/Rora/Grin2d/Pdyn/Ryr1/Gria2 | 7 |
| mmu04725 | mmu04725 | Cholinergic synapse - Mus musculus (house mouse) | 6/198 | 113/9720 | 0.027765291 | 0.027765291 | 0.165125816 | Adcy8/Chrna3/Chrna4/Camk2d/Kcnj12/Ache | 6 |
| mmu05144 | mmu05144 | Malaria - Mus musculus (house mouse) | 4/198 | 57/9720 | 0.028521732 | 0.028521732 | 0.165125816 | Hbb-bt/Hba-a2/Hbb-bs/Hba-a1 | 4 |
| mmu04514 | mmu04514 | Cell adhesion molecules - Mus musculus (house mouse) | 8/198 | 179/9720 | 0.029941892 | 0.029941892 | 0.168662717 | Ntng1/L1cam/Slitrk6/H2-Q2/H2-T24/Cd274/H2-Ob/Itga8 | 8 |
| mmu04730 | mmu04730 | Long-term depression - Mus musculus (house mouse) | 4/198 | 60/9720 | 0.033607809 | 0.033607809 | 0.18433092 | Prkg2/Ryr1/Gria2/Pla2g4e | 4 |
| mmu05022 | mmu05022 | Pathways of neurodegeneration - multiple diseases - Mus musculus (house mouse) | 16/198 | 481/9720 | 0.03644934 | 0.03644934 | 0.189479022 | Atp2a1/Fzd10/Fzd9/Prph/Dkk2/Camk2d/Nefh/Grin2d/Wnt9b/Fzd1/Wnt3/Nox4/Wnt2/Pdyn/Ryr1/Gria2 | 16 |
| mmu04921 | mmu04921 | Oxytocin signaling pathway - Mus musculus (house mouse) | 7/198 | 153/9720 | 0.036812942 | 0.036812942 | 0.189479022 | Adcy8/Camk2d/Kcnj5/Kcnj12/Mylk3/Ryr1/Pla2g4e | 7 |
| mmu05321 | mmu05321 | Inflammatory bowel disease - Mus musculus (house mouse) | 4/198 | 62/9720 | 0.037273777 | 0.037273777 | 0.189479022 | Gata3/Rora/Stat1/H2-Ob | 4 |
| mmu05216 | mmu05216 | Thyroid cancer - Mus musculus (house mouse) | 3/198 | 37/9720 | 0.038962978 | 0.038962978 | 0.193350117 | Ret/Tcf7l2/Lef1 | 3 |
| mmu04150 | mmu04150 | mTOR signaling pathway - Mus musculus (house mouse) | 7/198 | 158/9720 | 0.042611878 | 0.042611878 | 0.200994057 | Fzd10/Fzd9/Wnt9b/Grb10/Fzd1/Wnt3/Wnt2 | 7 |
| mmu04640 | mmu04640 | Hematopoietic cell lineage - Mus musculus (house mouse) | 5/198 | 94/9720 | 0.04270275 | 0.04270275 | 0.200994057 | Itga3/Kitl/Epor/Itga5/H2-Ob | 5 |
| mmu04062 | mmu04062 | Chemokine signaling pathway - Mus musculus (house mouse) | 8/198 | 193/9720 | 0.043678637 | 0.043678637 | 0.200994057 | Adcy8/Cxcl10/Ccr10/Shc3/Vav3/Stat1/Cxcl9/Ccl5 | 8 |
| mmu04061 | mmu04061 | Viral protein interaction with cytokine and cytokine receptor - Mus musculus (house mouse) | 5/198 | 95/9720 | 0.04436081 | 0.04436081 | 0.200994057 | Cxcl10/Ccr10/Tnfsf10/Cxcl9/Ccl5 | 5 |
| mmu00260 | mmu00260 | Glycine, serine and threonine metabolism - Mus musculus (house mouse) | 3/198 | 40/9720 | 0.047416305 | 0.047416305 | 0.210267154 | Dao/Sdsl/Alas2 | 3 |

**Supplementary Table 5:** Results of GO enrichment analysis of candidate genes.

|  | ONTOLOGY | ID | Description | GeneRatio | BgRatio | pvalue | p.adjust | qvalue | geneID | Count |
| --- | --- | --- | --- | --- | --- | --- | --- | --- | --- | --- |
| GO:0050808 | BP | GO:0050808 | synapse organization | 7/57 | 496/28943 | 5.25E-05 | 0.072459733 | 0.056059018 | Cbln4/Cntnap4/L1cam/Gap43/Unc13c/Itga3/Lgi2 | 7 |
| GO:0072659 | BP | GO:0072659 | protein localization to plasma membrane | 5/57 | 308/28943 | 0.000351706 | 0.12113555 | 0.093717431 | Camk2d/Prkg2/Itga3/Zdhhc22/Ank1 | 5 |
| GO:0043954 | BP | GO:0043954 | cellular component maintenance | 3/57 | 75/28943 | 0.000442199 | 0.12113555 | 0.093717431 | Cbln4/Itga3/Plekha7 | 3 |
| GO:1904862 | BP | GO:1904862 | inhibitory synapse assembly | 2/57 | 17/28943 | 0.000508486 | 0.12113555 | 0.093717431 | Cbln4/Lgi2 | 2 |
| GO:0045471 | BP | GO:0045471 | response to ethanol | 3/57 | 81/28943 | 0.000554081 | 0.12113555 | 0.093717431 | Grin3a/Glra3/Shh | 3 |
| GO:1901077 | BP | GO:1901077 | regulation of relaxation of muscle | 2/57 | 18/28943 | 0.000571323 | 0.12113555 | 0.093717431 | Camk2d/Actn3 | 2 |
| GO:0006670 | BP | GO:0006670 | sphingosine metabolic process | 2/57 | 20/28943 | 0.000707694 | 0.12113555 | 0.093717431 | Sptssb/Sgpp2 | 2 |
| GO:0033627 | BP | GO:0033627 | cell adhesion mediated by integrin | 3/57 | 90/28943 | 0.00075343 | 0.12113555 | 0.093717431 | L1cam/Itga3/Epha8 | 3 |
| GO:0046519 | BP | GO:0046519 | sphingoid metabolic process | 2/57 | 22/28943 | 0.000858233 | 0.12113555 | 0.093717431 | Sptssb/Sgpp2 | 2 |
| GO:1990778 | BP | GO:1990778 | protein localization to cell periphery | 5/57 | 377/28943 | 0.000877158 | 0.12113555 | 0.093717431 | Camk2d/Prkg2/Itga3/Zdhhc22/Ank1 | 5 |
| GO:0048643 | BP | GO:0048643 | positive regulation of skeletal muscle tissue development | 2/57 | 24/28943 | 0.001022832 | 0.124900908 | 0.096630529 | Actn3/Shh | 2 |
| GO:0030510 | BP | GO:0030510 | regulation of BMP signaling pathway | 3/57 | 104/28943 | 0.001145349 | 0.124900908 | 0.096630529 | Grem2/Vwc2l/Itga3 | 3 |
| GO:0097305 | BP | GO:0097305 | response to alcohol | 4/57 | 234/28943 | 0.001175751 | 0.124900908 | 0.096630529 | Grin3a/Glra3/Gpld1/Shh | 4 |
| GO:0032469 | BP | GO:0032469 | endoplasmic reticulum calcium ion homeostasis | 2/57 | 28/28943 | 0.001393771 | 0.125938455 | 0.097433234 | Tmtc4/Camk2d | 2 |
| GO:1901863 | BP | GO:1901863 | positive regulation of muscle tissue development | 2/57 | 29/28943 | 0.001495123 | 0.125938455 | 0.097433234 | Actn3/Shh | 2 |
| GO:0034311 | BP | GO:0034311 | diol metabolic process | 2/57 | 30/28943 | 0.001599896 | 0.125938455 | 0.097433234 | Sptssb/Sgpp2 | 2 |
| GO:0007411 | BP | GO:0007411 | axon guidance | 4/57 | 259/28943 | 0.001705902 | 0.125938455 | 0.097433234 | L1cam/Gap43/Shh/Epha8 | 4 |
| GO:0097485 | BP | GO:0097485 | neuron projection guidance | 4/57 | 260/28943 | 0.001730042 | 0.125938455 | 0.097433234 | L1cam/Gap43/Shh/Epha8 | 4 |
| GO:0048641 | BP | GO:0048641 | regulation of skeletal muscle tissue development | 2/57 | 32/28943 | 0.001819647 | 0.125938455 | 0.097433234 | Actn3/Shh | 2 |
| GO:0034329 | BP | GO:0034329 | cell junction assembly | 5/57 | 445/28943 | 0.001823873 | 0.125938455 | 0.097433234 | Cbln4/Cdh20/Gap43/Actn3/Lgi2 | 5 |
| GO:0001667 | BP | GO:0001667 | ameboidal-type cell migration | 5/57 | 471/28943 | 0.002333749 | 0.151222297 | 0.116994269 | Has1/Gpld1/Itga3/Kitl/Shh | 5 |
| GO:0090075 | BP | GO:0090075 | relaxation of muscle | 2/57 | 37/28943 | 0.002427943 | 0.151222297 | 0.116994269 | Camk2d/Actn3 | 2 |
| GO:0016079 | BP | GO:0016079 | synaptic vesicle exocytosis | 3/57 | 137/28943 | 0.002518547 | 0.151222297 | 0.116994269 | Grin3a/Glra3/Unc13c | 3 |
| GO:0006874 | BP | GO:0006874 | cellular calcium ion homeostasis | 4/57 | 292/28943 | 0.002634058 | 0.151568068 | 0.117261777 | Tmtc4/Npsr1/Camk2d/Pygm | 4 |
| GO:0044262 | BP | GO:0044262 | cellular carbohydrate metabolic process | 4/57 | 302/28943 | 0.002972484 | 0.163481125 | 0.126478403 | Has1/Gpld1/Actn3/Pygm | 4 |
| GO:0034331 | BP | GO:0034331 | cell junction maintenance | 2/57 | 45/28943 | 0.003572873 | 0.163481125 | 0.126478403 | Cbln4/Plekha7 | 2 |
| GO:0030111 | BP | GO:0030111 | regulation of Wnt signaling pathway | 4/57 | 319/28943 | 0.003614213 | 0.163481125 | 0.126478403 | Dkk2/Itga3/Cxxc4/Shh | 4 |
| GO:0072503 | BP | GO:0072503 | cellular divalent inorganic cation homeostasis | 4/57 | 320/28943 | 0.003654663 | 0.163481125 | 0.126478403 | Tmtc4/Npsr1/Camk2d/Pygm | 4 |
| GO:0055074 | BP | GO:0055074 | calcium ion homeostasis | 4/57 | 324/28943 | 0.003819542 | 0.163481125 | 0.126478403 | Tmtc4/Npsr1/Camk2d/Pygm | 4 |
| GO:0010907 | BP | GO:0010907 | positive regulation of glucose metabolic process | 2/57 | 47/28943 | 0.003891467 | 0.163481125 | 0.126478403 | Gpld1/Actn3 | 2 |
| GO:0010634 | BP | GO:0010634 | positive regulation of epithelial cell migration | 3/57 | 160/28943 | 0.00389836 | 0.163481125 | 0.126478403 | Gpld1/Itga3/Shh | 3 |
| GO:0010631 | BP | GO:0010631 | epithelial cell migration | 4/57 | 328/28943 | 0.003989408 | 0.163481125 | 0.126478403 | Gpld1/Itga3/Kitl/Shh | 4 |
| GO:1990573 | BP | GO:1990573 | potassium ion import across plasma membrane | 2/57 | 48/28943 | 0.004055548 | 0.163481125 | 0.126478403 | Kcnj16/Kcnj12 | 2 |
| GO:0090132 | BP | GO:0090132 | epithelium migration | 4/57 | 330/28943 | 0.004076233 | 0.163481125 | 0.126478403 | Gpld1/Itga3/Kitl/Shh | 4 |
| GO:0090130 | BP | GO:0090130 | tissue migration | 4/57 | 332/28943 | 0.004164331 | 0.163481125 | 0.126478403 | Gpld1/Itga3/Kitl/Shh | 4 |
| GO:0034332 | BP | GO:0034332 | adherens junction organization | 2/57 | 50/28943 | 0.004393213 | 0.163481125 | 0.126478403 | Cdh20/Plekha7 | 2 |
| GO:0030178 | BP | GO:0030178 | negative regulation of Wnt signaling pathway | 3/57 | 168/28943 | 0.004467144 | 0.163481125 | 0.126478403 | Dkk2/Cxxc4/Shh | 3 |
| GO:0008038 | BP | GO:0008038 | neuron recognition | 2/57 | 51/28943 | 0.004566772 | 0.163481125 | 0.126478403 | L1cam/Gap43 | 2 |
| GO:0071248 | BP | GO:0071248 | cellular response to metal ion | 3/57 | 170/28943 | 0.004616773 | 0.163481125 | 0.126478403 | Glra3/Gpld1/Shh | 3 |
| GO:0030509 | BP | GO:0030509 | BMP signaling pathway | 3/57 | 176/28943 | 0.005083786 | 0.171944957 | 0.133026511 | Grem2/Vwc2l/Itga3 | 3 |
| GO:1901861 | BP | GO:1901861 | regulation of muscle tissue development | 2/57 | 56/28943 | 0.005481328 | 0.171944957 | 0.133026511 | Actn3/Shh | 2 |
| GO:0072507 | BP | GO:0072507 | divalent inorganic cation homeostasis | 4/57 | 359/28943 | 0.005482638 | 0.171944957 | 0.133026511 | Tmtc4/Npsr1/Camk2d/Pygm | 4 |
| GO:0030514 | BP | GO:0030514 | negative regulation of BMP signaling pathway | 2/57 | 57/28943 | 0.005673504 | 0.171944957 | 0.133026511 | Grem2/Vwc2l | 2 |
| GO:0051155 | BP | GO:0051155 | positive regulation of striated muscle cell differentiation | 2/57 | 58/28943 | 0.00586874 | 0.171944957 | 0.133026511 | Actn3/Shh | 2 |
| GO:0007269 | BP | GO:0007269 | neurotransmitter secretion | 3/57 | 186/28943 | 0.00592356 | 0.171944957 | 0.133026511 | Grin3a/Glra3/Unc13c | 3 |
| GO:0099643 | BP | GO:0099643 | signal release from synapse | 3/57 | 186/28943 | 0.00592356 | 0.171944957 | 0.133026511 | Grin3a/Glra3/Unc13c | 3 |
| GO:0071772 | BP | GO:0071772 | response to BMP | 3/57 | 187/28943 | 0.006011822 | 0.171944957 | 0.133026511 | Grem2/Vwc2l/Itga3 | 3 |
| GO:0071773 | BP | GO:0071773 | cellular response to BMP stimulus | 3/57 | 187/28943 | 0.006011822 | 0.171944957 | 0.133026511 | Grem2/Vwc2l/Itga3 | 3 |
| GO:0006643 | BP | GO:0006643 | membrane lipid metabolic process | 3/57 | 188/28943 | 0.006100871 | 0.171944957 | 0.133026511 | Gpld1/Sptssb/Sgpp2 | 3 |
| GO:0007416 | BP | GO:0007416 | synapse assembly | 3/57 | 194/28943 | 0.006651785 | 0.17417624 | 0.13475276 | Cbln4/Gap43/Lgi2 | 3 |
| GO:0010676 | BP | GO:0010676 | positive regulation of cellular carbohydrate metabolic process | 2/57 | 62/28943 | 0.006680027 | 0.17417624 | 0.13475276 | Gpld1/Actn3 | 2 |
| GO:0001755 | BP | GO:0001755 | neural crest cell migration | 2/57 | 63/28943 | 0.006890374 | 0.17417624 | 0.13475276 | Kitl/Shh | 2 |
| GO:0090497 | BP | GO:0090497 | mesenchymal cell migration | 2/57 | 65/28943 | 0.007320013 | 0.17417624 | 0.13475276 | Kitl/Shh | 2 |
| GO:0046578 | BP | GO:0046578 | regulation of Ras protein signal transduction | 3/57 | 203/28943 | 0.007532205 | 0.17417624 | 0.13475276 | Camk2d/Itga3/Kitl | 3 |
| GO:0046579 | BP | GO:0046579 | positive regulation of Ras protein signal transduction | 2/57 | 72/28943 | 0.008916401 | 0.17417624 | 0.13475276 | Camk2d/Kitl | 2 |
| GO:0048678 | BP | GO:0048678 | response to axon injury | 2/57 | 72/28943 | 0.008916401 | 0.17417624 | 0.13475276 | Gap43/Shh | 2 |
| GO:0045109 | BP | GO:0045109 | intermediate filament organization | 2/57 | 74/28943 | 0.009398588 | 0.17417624 | 0.13475276 | Prph/Shh | 2 |
| GO:0006875 | BP | GO:0006875 | cellular metal ion homeostasis | 4/57 | 425/28943 | 0.009814981 | 0.17417624 | 0.13475276 | Tmtc4/Npsr1/Camk2d/Pygm | 4 |
| GO:0099504 | BP | GO:0099504 | synaptic vesicle cycle | 3/57 | 230/28943 | 0.010573068 | 0.17417624 | 0.13475276 | Grin3a/Glra3/Unc13c | 3 |
| GO:0051057 | BP | GO:0051057 | positive regulation of small GTPase mediated signal transduction | 2/57 | 79/28943 | 0.010653795 | 0.17417624 | 0.13475276 | Camk2d/Kitl | 2 |
| GO:0051149 | BP | GO:0051149 | positive regulation of muscle cell differentiation | 2/57 | 80/28943 | 0.010913269 | 0.17417624 | 0.13475276 | Actn3/Shh | 2 |
| GO:0007160 | BP | GO:0007160 | cell-matrix adhesion | 3/57 | 233/28943 | 0.010948723 | 0.17417624 | 0.13475276 | L1cam/Actn3/Itga3 | 3 |
| GO:0051056 | BP | GO:0051056 | regulation of small GTPase mediated signal transduction | 3/57 | 236/28943 | 0.011332049 | 0.17417624 | 0.13475276 | Camk2d/Itga3/Kitl | 3 |
| GO:0051279 | BP | GO:0051279 | regulation of release of sequestered calcium ion into cytosol | 2/57 | 82/28943 | 0.011440557 | 0.17417624 | 0.13475276 | Npsr1/Camk2d | 2 |
| GO:0045913 | BP | GO:0045913 | positive regulation of carbohydrate metabolic process | 2/57 | 84/28943 | 0.011978888 | 0.17417624 | 0.13475276 | Gpld1/Actn3 | 2 |
| GO:2000300 | BP | GO:2000300 | regulation of synaptic vesicle exocytosis | 2/57 | 84/28943 | 0.011978888 | 0.17417624 | 0.13475276 | Grin3a/Glra3 | 2 |
| GO:0046777 | BP | GO:0046777 | protein autophosphorylation | 3/57 | 241/28943 | 0.011988046 | 0.17417624 | 0.13475276 | Camk2d/Prkg2/Epha8 | 3 |
| GO:0071241 | BP | GO:0071241 | cellular response to inorganic substance | 3/57 | 241/28943 | 0.011988046 | 0.17417624 | 0.13475276 | Glra3/Gpld1/Shh | 3 |
| GO:0016055 | BP | GO:0016055 | Wnt signaling pathway | 4/57 | 451/28943 | 0.011998168 | 0.17417624 | 0.13475276 | Dkk2/Itga3/Cxxc4/Shh | 4 |
| GO:0198738 | BP | GO:0198738 | cell-cell signaling by wnt | 4/57 | 453/28943 | 0.012177992 | 0.17417624 | 0.13475276 | Dkk2/Itga3/Cxxc4/Shh | 4 |
| GO:0046530 | BP | GO:0046530 | photoreceptor cell differentiation | 2/57 | 85/28943 | 0.012252166 | 0.17417624 | 0.13475276 | Dzank1/Shh | 2 |
| GO:0006836 | BP | GO:0006836 | neurotransmitter transport | 3/57 | 243/28943 | 0.012256459 | 0.17417624 | 0.13475276 | Grin3a/Glra3/Unc13c | 3 |
| GO:0045664 | BP | GO:0045664 | regulation of neuron differentiation | 3/57 | 244/28943 | 0.012391958 | 0.17417624 | 0.13475276 | Vwc2l/Cit/Shh | 3 |
| GO:0048708 | BP | GO:0048708 | astrocyte differentiation | 2/57 | 87/28943 | 0.012806889 | 0.17417624 | 0.13475276 | Gap43/Shh | 2 |
| GO:0010632 | BP | GO:0010632 | regulation of epithelial cell migration | 3/57 | 248/28943 | 0.01294259 | 0.17417624 | 0.13475276 | Gpld1/Itga3/Shh | 3 |
| GO:0007218 | BP | GO:0007218 | neuropeptide signaling pathway | 2/57 | 89/28943 | 0.013372425 | 0.17417624 | 0.13475276 | Glra3/Npsr1 | 2 |
| GO:0014032 | BP | GO:0014032 | neural crest cell development | 2/57 | 89/28943 | 0.013372425 | 0.17417624 | 0.13475276 | Kitl/Shh | 2 |
| GO:0050848 | BP | GO:0050848 | regulation of calcium-mediated signaling | 2/57 | 89/28943 | 0.013372425 | 0.17417624 | 0.13475276 | L1cam/Actn3 | 2 |
| GO:0045665 | BP | GO:0045665 | negative regulation of neuron differentiation | 2/57 | 90/28943 | 0.013659221 | 0.17417624 | 0.13475276 | Cit/Shh | 2 |
| GO:0001505 | BP | GO:0001505 | regulation of neurotransmitter levels | 3/57 | 255/28943 | 0.01393957 | 0.17417624 | 0.13475276 | Grin3a/Glra3/Unc13c | 3 |
| GO:0045104 | BP | GO:0045104 | intermediate filament cytoskeleton organization | 2/57 | 93/28943 | 0.014535579 | 0.17417624 | 0.13475276 | Prph/Shh | 2 |
| GO:0099003 | BP | GO:0099003 | vesicle-mediated transport in synapse | 3/57 | 260/28943 | 0.014677823 | 0.17417624 | 0.13475276 | Grin3a/Glra3/Unc13c | 3 |
| GO:0045103 | BP | GO:0045103 | intermediate filament-based process | 2/57 | 94/28943 | 0.014832986 | 0.17417624 | 0.13475276 | Prph/Shh | 2 |
| GO:0007409 | BP | GO:0007409 | axonogenesis | 4/57 | 493/28943 | 0.016144825 | 0.17417624 | 0.13475276 | L1cam/Gap43/Shh/Epha8 | 4 |
| GO:0048864 | BP | GO:0048864 | stem cell development | 2/57 | 99/28943 | 0.016359168 | 0.17417624 | 0.13475276 | Kitl/Shh | 2 |
| GO:0051781 | BP | GO:0051781 | positive regulation of cell division | 2/57 | 100/28943 | 0.016672157 | 0.17417624 | 0.13475276 | Cit/Shh | 2 |
| GO:0030003 | BP | GO:0030003 | cellular cation homeostasis | 4/57 | 498/28943 | 0.016691443 | 0.17417624 | 0.13475276 | Tmtc4/Npsr1/Camk2d/Pygm | 4 |
| GO:0090092 | BP | GO:0090092 | regulation of transmembrane receptor protein serine/threonine kinase signaling pathway | 3/57 | 273/28943 | 0.016699799 | 0.17417624 | 0.13475276 | Grem2/Vwc2l/Itga3 | 3 |
| GO:0043502 | BP | GO:0043502 | regulation of muscle adaptation | 2/57 | 101/28943 | 0.016987705 | 0.17417624 | 0.13475276 | Camk2d/Actn3 | 2 |
| GO:0044264 | BP | GO:0044264 | cellular polysaccharide metabolic process | 2/57 | 101/28943 | 0.016987705 | 0.17417624 | 0.13475276 | Has1/Pygm | 2 |
| GO:0014033 | BP | GO:0014033 | neural crest cell differentiation | 2/57 | 102/28943 | 0.017305801 | 0.17417624 | 0.13475276 | Kitl/Shh | 2 |
| GO:0050795 | BP | GO:0050795 | regulation of behavior | 2/57 | 103/28943 | 0.017626434 | 0.17417624 | 0.13475276 | Cntnap4/Npsr1 | 2 |
| GO:0051153 | BP | GO:0051153 | regulation of striated muscle cell differentiation | 2/57 | 104/28943 | 0.017949592 | 0.17417624 | 0.13475276 | Actn3/Shh | 2 |
| GO:0090288 | BP | GO:0090288 | negative regulation of cellular response to growth factor stimulus | 2/57 | 104/28943 | 0.017949592 | 0.17417624 | 0.13475276 | Grem2/Vwc2l | 2 |
| GO:0072091 | BP | GO:0072091 | regulation of stem cell proliferation | 2/57 | 106/28943 | 0.018603444 | 0.17417624 | 0.13475276 | Kitl/Shh | 2 |
| GO:0006821 | BP | GO:0006821 | chloride transport | 2/57 | 107/28943 | 0.018934116 | 0.17417624 | 0.13475276 | Glra3/Prkg2 | 2 |
| GO:0009953 | BP | GO:0009953 | dorsal/ventral pattern formation | 2/57 | 107/28943 | 0.018934116 | 0.17417624 | 0.13475276 | Grem2/Shh | 2 |
| GO:0006971 | BP | GO:0006971 | hypotonic response | 1/57 | 10/28943 | 0.019523271 | 0.17417624 | 0.13475276 | Prkg2 | 1 |
| GO:0010764 | BP | GO:0010764 | negative regulation of fibroblast migration | 1/57 | 10/28943 | 0.019523271 | 0.17417624 | 0.13475276 | Has1 | 1 |
| GO:0014883 | BP | GO:0014883 | transition between fast and slow fiber | 1/57 | 10/28943 | 0.019523271 | 0.17417624 | 0.13475276 | Actn3 | 1 |
| GO:0032225 | BP | GO:0032225 | regulation of synaptic transmission, dopaminergic | 1/57 | 10/28943 | 0.019523271 | 0.17417624 | 0.13475276 | Cntnap4 | 1 |
| GO:0035581 | BP | GO:0035581 | sequestering of extracellular ligand from receptor | 1/57 | 10/28943 | 0.019523271 | 0.17417624 | 0.13475276 | Grem2 | 1 |
| GO:0060484 | BP | GO:0060484 | lung-associated mesenchyme development | 1/57 | 10/28943 | 0.019523271 | 0.17417624 | 0.13475276 | Shh | 1 |
| GO:0060513 | BP | GO:0060513 | prostatic bud formation | 1/57 | 10/28943 | 0.019523271 | 0.17417624 | 0.13475276 | Shh | 1 |
| GO:0061525 | BP | GO:0061525 | hindgut development | 1/57 | 10/28943 | 0.019523271 | 0.17417624 | 0.13475276 | Shh | 1 |
| GO:0070662 | BP | GO:0070662 | mast cell proliferation | 1/57 | 10/28943 | 0.019523271 | 0.17417624 | 0.13475276 | Kitl | 1 |
| GO:0070666 | BP | GO:0070666 | regulation of mast cell proliferation | 1/57 | 10/28943 | 0.019523271 | 0.17417624 | 0.13475276 | Kitl | 1 |
| GO:0072203 | BP | GO:0072203 | cell proliferation involved in metanephros development | 1/57 | 10/28943 | 0.019523271 | 0.17417624 | 0.13475276 | Shh | 1 |
| GO:0098528 | BP | GO:0098528 | skeletal muscle fiber differentiation | 1/57 | 10/28943 | 0.019523271 | 0.17417624 | 0.13475276 | Shh | 1 |
| GO:1901856 | BP | GO:1901856 | negative regulation of cellular respiration | 1/57 | 10/28943 | 0.019523271 | 0.17417624 | 0.13475276 | Actn3 | 1 |
| GO:0045055 | BP | GO:0045055 | regulated exocytosis | 3/57 | 291/28943 | 0.019745577 | 0.17417624 | 0.13475276 | Grin3a/Glra3/Unc13c | 3 |
| GO:0010595 | BP | GO:0010595 | positive regulation of endothelial cell migration | 2/57 | 110/28943 | 0.019940985 | 0.17417624 | 0.13475276 | Gpld1/Shh | 2 |
| GO:0042102 | BP | GO:0042102 | positive regulation of T cell proliferation | 2/57 | 110/28943 | 0.019940985 | 0.17417624 | 0.13475276 | Kitl/Shh | 2 |
| GO:0010038 | BP | GO:0010038 | response to metal ion | 3/57 | 296/28943 | 0.0206426 | 0.17417624 | 0.13475276 | Glra3/Gpld1/Shh | 3 |
| GO:0005976 | BP | GO:0005976 | polysaccharide metabolic process | 2/57 | 113/28943 | 0.020969913 | 0.17417624 | 0.13475276 | Has1/Pygm | 2 |
| GO:0007156 | BP | GO:0007156 | homophilic cell adhesion via plasma membrane adhesion molecules | 2/57 | 114/28943 | 0.021317742 | 0.17417624 | 0.13475276 | L1cam/Cdh20 | 2 |
| GO:0010906 | BP | GO:0010906 | regulation of glucose metabolic process | 2/57 | 114/28943 | 0.021317742 | 0.17417624 | 0.13475276 | Gpld1/Actn3 | 2 |
| GO:1903076 | BP | GO:1903076 | regulation of protein localization to plasma membrane | 2/57 | 114/28943 | 0.021317742 | 0.17417624 | 0.13475276 | Camk2d/Itga3 | 2 |
| GO:0014889 | BP | GO:0014889 | muscle atrophy | 1/57 | 11/28943 | 0.021454878 | 0.17417624 | 0.13475276 | Actn3 | 1 |
| GO:0021940 | BP | GO:0021940 | positive regulation of cerebellar granule cell precursor proliferation | 1/57 | 11/28943 | 0.021454878 | 0.17417624 | 0.13475276 | Shh | 1 |
| GO:0034384 | BP | GO:0034384 | high-density lipoprotein particle clearance | 1/57 | 11/28943 | 0.021454878 | 0.17417624 | 0.13475276 | Gpld1 | 1 |
| GO:0048262 | BP | GO:0048262 | determination of dorsal/ventral asymmetry | 1/57 | 11/28943 | 0.021454878 | 0.17417624 | 0.13475276 | Grem2 | 1 |
| GO:0048263 | BP | GO:0048263 | determination of dorsal identity | 1/57 | 11/28943 | 0.021454878 | 0.17417624 | 0.13475276 | Grem2 | 1 |
| GO:0048617 | BP | GO:0048617 | embryonic foregut morphogenesis | 1/57 | 11/28943 | 0.021454878 | 0.17417624 | 0.13475276 | Shh | 1 |
| GO:0050774 | BP | GO:0050774 | negative regulation of dendrite morphogenesis | 1/57 | 11/28943 | 0.021454878 | 0.17417624 | 0.13475276 | Cit | 1 |
| GO:0060174 | BP | GO:0060174 | limb bud formation | 1/57 | 11/28943 | 0.021454878 | 0.17417624 | 0.13475276 | Shh | 1 |
| GO:0060405 | BP | GO:0060405 | regulation of penile erection | 1/57 | 11/28943 | 0.021454878 | 0.17417624 | 0.13475276 | Shh | 1 |
| GO:0060768 | BP | GO:0060768 | regulation of epithelial cell proliferation involved in prostate gland development | 1/57 | 11/28943 | 0.021454878 | 0.17417624 | 0.13475276 | Shh | 1 |
| GO:0071372 | BP | GO:0071372 | cellular response to follicle-stimulating hormone stimulus | 1/57 | 11/28943 | 0.021454878 | 0.17417624 | 0.13475276 | Epha8 | 1 |
| GO:0072075 | BP | GO:0072075 | metanephric mesenchyme development | 1/57 | 11/28943 | 0.021454878 | 0.17417624 | 0.13475276 | Shh | 1 |
| GO:1900115 | BP | GO:1900115 | extracellular regulation of signal transduction | 1/57 | 11/28943 | 0.021454878 | 0.17417624 | 0.13475276 | Grem2 | 1 |
| GO:1900116 | BP | GO:1900116 | extracellular negative regulation of signal transduction | 1/57 | 11/28943 | 0.021454878 | 0.17417624 | 0.13475276 | Grem2 | 1 |
| GO:1902035 | BP | GO:1902035 | positive regulation of hematopoietic stem cell proliferation | 1/57 | 11/28943 | 0.021454878 | 0.17417624 | 0.13475276 | Kitl | 1 |
| GO:1990504 | BP | GO:1990504 | dense core granule exocytosis | 1/57 | 11/28943 | 0.021454878 | 0.17417624 | 0.13475276 | Unc13c | 1 |
| GO:0018107 | BP | GO:0018107 | peptidyl-threonine phosphorylation | 2/57 | 115/28943 | 0.021667979 | 0.17417624 | 0.13475276 | Camk2d/Cit | 2 |
| GO:0035249 | BP | GO:0035249 | synaptic transmission, glutamatergic | 2/57 | 117/28943 | 0.022375637 | 0.17417624 | 0.13475276 | Shc3/Unc13c | 2 |
| GO:0019751 | BP | GO:0019751 | polyol metabolic process | 2/57 | 118/28943 | 0.022733037 | 0.17417624 | 0.13475276 | Sptssb/Sgpp2 | 2 |
| GO:0045666 | BP | GO:0045666 | positive regulation of neuron differentiation | 2/57 | 119/28943 | 0.023092804 | 0.17417624 | 0.13475276 | Vwc2l/Shh | 2 |
| GO:0007440 | BP | GO:0007440 | foregut morphogenesis | 1/57 | 12/28943 | 0.023382746 | 0.17417624 | 0.13475276 | Shh | 1 |
| GO:0010649 | BP | GO:0010649 | regulation of cell communication by electrical coupling | 1/57 | 12/28943 | 0.023382746 | 0.17417624 | 0.13475276 | Camk2d | 1 |
| GO:0014874 | BP | GO:0014874 | response to stimulus involved in regulation of muscle adaptation | 1/57 | 12/28943 | 0.023382746 | 0.17417624 | 0.13475276 | Actn3 | 1 |
| GO:0016188 | BP | GO:0016188 | synaptic vesicle maturation | 1/57 | 12/28943 | 0.023382746 | 0.17417624 | 0.13475276 | Unc13c | 1 |
| GO:0032354 | BP | GO:0032354 | response to follicle-stimulating hormone | 1/57 | 12/28943 | 0.023382746 | 0.17417624 | 0.13475276 | Epha8 | 1 |
| GO:0033089 | BP | GO:0033089 | positive regulation of T cell differentiation in thymus | 1/57 | 12/28943 | 0.023382746 | 0.17417624 | 0.13475276 | Shh | 1 |
| GO:0035331 | BP | GO:0035331 | negative regulation of hippo signaling | 1/57 | 12/28943 | 0.023382746 | 0.17417624 | 0.13475276 | Cit | 1 |
| GO:0043587 | BP | GO:0043587 | tongue morphogenesis | 1/57 | 12/28943 | 0.023382746 | 0.17417624 | 0.13475276 | Shh | 1 |
| GO:0048630 | BP | GO:0048630 | skeletal muscle tissue growth | 1/57 | 12/28943 | 0.023382746 | 0.17417624 | 0.13475276 | Actn3 | 1 |
| GO:0060013 | BP | GO:0060013 | righting reflex | 1/57 | 12/28943 | 0.023382746 | 0.17417624 | 0.13475276 | Npsr1 | 1 |
| GO:0060020 | BP | GO:0060020 | Bergmann glial cell differentiation | 1/57 | 12/28943 | 0.023382746 | 0.17417624 | 0.13475276 | Shh | 1 |
| GO:0060439 | BP | GO:0060439 | trachea morphogenesis | 1/57 | 12/28943 | 0.023382746 | 0.17417624 | 0.13475276 | Shh | 1 |
| GO:0060579 | BP | GO:0060579 | ventral spinal cord interneuron fate commitment | 1/57 | 12/28943 | 0.023382746 | 0.17417624 | 0.13475276 | Shh | 1 |
| GO:0060581 | BP | GO:0060581 | cell fate commitment involved in pattern specification | 1/57 | 12/28943 | 0.023382746 | 0.17417624 | 0.13475276 | Shh | 1 |
| GO:0060767 | BP | GO:0060767 | epithelial cell proliferation involved in prostate gland development | 1/57 | 12/28943 | 0.023382746 | 0.17417624 | 0.13475276 | Shh | 1 |
| GO:0070444 | BP | GO:0070444 | oligodendrocyte progenitor proliferation | 1/57 | 12/28943 | 0.023382746 | 0.17417624 | 0.13475276 | Shh | 1 |
| GO:0070445 | BP | GO:0070445 | regulation of oligodendrocyte progenitor proliferation | 1/57 | 12/28943 | 0.023382746 | 0.17417624 | 0.13475276 | Shh | 1 |
| GO:0071281 | BP | GO:0071281 | cellular response to iron ion | 1/57 | 12/28943 | 0.023382746 | 0.17417624 | 0.13475276 | Gpld1 | 1 |
| GO:0071679 | BP | GO:0071679 | commissural neuron axon guidance | 1/57 | 12/28943 | 0.023382746 | 0.17417624 | 0.13475276 | Shh | 1 |
| GO:0090209 | BP | GO:0090209 | negative regulation of triglyceride metabolic process | 1/57 | 12/28943 | 0.023382746 | 0.17417624 | 0.13475276 | Gpld1 | 1 |
| GO:2001054 | BP | GO:2001054 | negative regulation of mesenchymal cell apoptotic process | 1/57 | 12/28943 | 0.023382746 | 0.17417624 | 0.13475276 | Shh | 1 |
| GO:2001225 | BP | GO:2001225 | regulation of chloride transport | 1/57 | 12/28943 | 0.023382746 | 0.17417624 | 0.13475276 | Prkg2 | 1 |
| GO:0002062 | BP | GO:0002062 | chondrocyte differentiation | 2/57 | 120/28943 | 0.023454928 | 0.17417624 | 0.13475276 | Gpld1/Prkg2 | 2 |
| GO:0051209 | BP | GO:0051209 | release of sequestered calcium ion into cytosol | 2/57 | 120/28943 | 0.023454928 | 0.17417624 | 0.13475276 | Npsr1/Camk2d | 2 |
| GO:0051283 | BP | GO:0051283 | negative regulation of sequestering of calcium ion | 2/57 | 121/28943 | 0.023819398 | 0.17417624 | 0.13475276 | Npsr1/Camk2d | 2 |
| GO:0046928 | BP | GO:0046928 | regulation of neurotransmitter secretion | 2/57 | 122/28943 | 0.024186204 | 0.17417624 | 0.13475276 | Grin3a/Glra3 | 2 |
| GO:0098659 | BP | GO:0098659 | inorganic cation import across plasma membrane | 2/57 | 122/28943 | 0.024186204 | 0.17417624 | 0.13475276 | Kcnj16/Kcnj12 | 2 |
| GO:0099587 | BP | GO:0099587 | inorganic ion import across plasma membrane | 2/57 | 122/28943 | 0.024186204 | 0.17417624 | 0.13475276 | Kcnj16/Kcnj12 | 2 |
| GO:0018210 | BP | GO:0018210 | peptidyl-threonine modification | 2/57 | 123/28943 | 0.024555336 | 0.17417624 | 0.13475276 | Camk2d/Cit | 2 |
| GO:0051282 | BP | GO:0051282 | regulation of sequestering of calcium ion | 2/57 | 123/28943 | 0.024555336 | 0.17417624 | 0.13475276 | Npsr1/Camk2d | 2 |
| GO:0090287 | BP | GO:0090287 | regulation of cellular response to growth factor stimulus | 3/57 | 318/28943 | 0.024853592 | 0.17417624 | 0.13475276 | Grem2/Vwc2l/Itga3 | 3 |
| GO:0002040 | BP | GO:0002040 | sprouting angiogenesis | 2/57 | 125/28943 | 0.025300536 | 0.17417624 | 0.13475276 | Gpld1/Shh | 2 |
| GO:0051208 | BP | GO:0051208 | sequestering of calcium ion | 2/57 | 125/28943 | 0.025300536 | 0.17417624 | 0.13475276 | Npsr1/Camk2d | 2 |
| GO:0002430 | BP | GO:0002430 | complement receptor mediated signaling pathway | 1/57 | 13/28943 | 0.025306882 | 0.17417624 | 0.13475276 | Gpld1 | 1 |
| GO:0021794 | BP | GO:0021794 | thalamus development | 1/57 | 13/28943 | 0.025306882 | 0.17417624 | 0.13475276 | Shh | 1 |
| GO:0033085 | BP | GO:0033085 | negative regulation of T cell differentiation in thymus | 1/57 | 13/28943 | 0.025306882 | 0.17417624 | 0.13475276 | Shh | 1 |
| GO:0048070 | BP | GO:0048070 | regulation of developmental pigmentation | 1/57 | 13/28943 | 0.025306882 | 0.17417624 | 0.13475276 | Kitl | 1 |
| GO:0048742 | BP | GO:0048742 | regulation of skeletal muscle fiber development | 1/57 | 13/28943 | 0.025306882 | 0.17417624 | 0.13475276 | Actn3 | 1 |
| GO:0060601 | BP | GO:0060601 | lateral sprouting from an epithelium | 1/57 | 13/28943 | 0.025306882 | 0.17417624 | 0.13475276 | Shh | 1 |
| GO:0120305 | BP | GO:0120305 | regulation of pigmentation | 1/57 | 13/28943 | 0.025306882 | 0.17417624 | 0.13475276 | Kitl | 1 |
| GO:1904338 | BP | GO:1904338 | regulation of dopaminergic neuron differentiation | 1/57 | 13/28943 | 0.025306882 | 0.17417624 | 0.13475276 | Shh | 1 |
| GO:0009895 | BP | GO:0009895 | negative regulation of catabolic process | 3/57 | 324/28943 | 0.026076769 | 0.17417624 | 0.13475276 | Gpld1/Actn3/Shh | 3 |
| GO:0022409 | BP | GO:0022409 | positive regulation of cell-cell adhesion | 3/57 | 324/28943 | 0.026076769 | 0.17417624 | 0.13475276 | L1cam/Kitl/Shh | 3 |
| GO:0043500 | BP | GO:0043500 | muscle adaptation | 2/57 | 128/28943 | 0.026435522 | 0.17417624 | 0.13475276 | Camk2d/Actn3 | 2 |
| GO:0070372 | BP | GO:0070372 | regulation of ERK1 and ERK2 cascade | 3/57 | 326/28943 | 0.026491606 | 0.17417624 | 0.13475276 | L1cam/Npsr1/Camk2d | 3 |
| GO:0016081 | BP | GO:0016081 | synaptic vesicle docking | 1/57 | 14/28943 | 0.027227293 | 0.17417624 | 0.13475276 | Unc13c | 1 |
| GO:0021514 | BP | GO:0021514 | ventral spinal cord interneuron differentiation | 1/57 | 14/28943 | 0.027227293 | 0.17417624 | 0.13475276 | Shh | 1 |
| GO:0021903 | BP | GO:0021903 | rostrocaudal neural tube patterning | 1/57 | 14/28943 | 0.027227293 | 0.17417624 | 0.13475276 | Shh | 1 |
| GO:0021936 | BP | GO:0021936 | regulation of cerebellar granule cell precursor proliferation | 1/57 | 14/28943 | 0.027227293 | 0.17417624 | 0.13475276 | Shh | 1 |
| GO:0034244 | BP | GO:0034244 | negative regulation of transcription elongation by RNA polymerase II | 1/57 | 14/28943 | 0.027227293 | 0.17417624 | 0.13475276 | Shh | 1 |
| GO:0042983 | BP | GO:0042983 | amyloid precursor protein biosynthetic process | 1/57 | 14/28943 | 0.027227293 | 0.17417624 | 0.13475276 | Necab1 | 1 |
| GO:0042984 | BP | GO:0042984 | regulation of amyloid precursor protein biosynthetic process | 1/57 | 14/28943 | 0.027227293 | 0.17417624 | 0.13475276 | Necab1 | 1 |
| GO:0045060 | BP | GO:0045060 | negative thymic T cell selection | 1/57 | 14/28943 | 0.027227293 | 0.17417624 | 0.13475276 | Shh | 1 |
| GO:0045989 | BP | GO:0045989 | positive regulation of striated muscle contraction | 1/57 | 14/28943 | 0.027227293 | 0.17417624 | 0.13475276 | Actn3 | 1 |
| GO:0046512 | BP | GO:0046512 | sphingosine biosynthetic process | 1/57 | 14/28943 | 0.027227293 | 0.17417624 | 0.13475276 | Sptssb | 1 |
| GO:0046520 | BP | GO:0046520 | sphingoid biosynthetic process | 1/57 | 14/28943 | 0.027227293 | 0.17417624 | 0.13475276 | Sptssb | 1 |
| GO:0048711 | BP | GO:0048711 | positive regulation of astrocyte differentiation | 1/57 | 14/28943 | 0.027227293 | 0.17417624 | 0.13475276 | Shh | 1 |
| GO:0051152 | BP | GO:0051152 | positive regulation of smooth muscle cell differentiation | 1/57 | 14/28943 | 0.027227293 | 0.17417624 | 0.13475276 | Shh | 1 |
| GO:0060736 | BP | GO:0060736 | prostate gland growth | 1/57 | 14/28943 | 0.027227293 | 0.17417624 | 0.13475276 | Shh | 1 |
| GO:0071285 | BP | GO:0071285 | cellular response to lithium ion | 1/57 | 14/28943 | 0.027227293 | 0.17417624 | 0.13475276 | Shh | 1 |
| GO:0071294 | BP | GO:0071294 | cellular response to zinc ion | 1/57 | 14/28943 | 0.027227293 | 0.17417624 | 0.13475276 | Glra3 | 1 |
| GO:1902514 | BP | GO:1902514 | regulation of calcium ion transmembrane transport via high voltage-gated calcium channel | 1/57 | 14/28943 | 0.027227293 | 0.17417624 | 0.13475276 | Camk2d | 1 |
| GO:0051146 | BP | GO:0051146 | striated muscle cell differentiation | 3/57 | 334/28943 | 0.028186476 | 0.17417624 | 0.13475276 | Camk2d/Actn3/Shh | 3 |
| GO:0016042 | BP | GO:0016042 | lipid catabolic process | 3/57 | 338/28943 | 0.029055201 | 0.17417624 | 0.13475276 | Plch1/Gpld1/Plcxd3 | 3 |
| GO:0010172 | BP | GO:0010172 | embryonic body morphogenesis | 1/57 | 15/28943 | 0.029143988 | 0.17417624 | 0.13475276 | Grem2 | 1 |
| GO:0014733 | BP | GO:0014733 | regulation of skeletal muscle adaptation | 1/57 | 15/28943 | 0.029143988 | 0.17417624 | 0.13475276 | Actn3 | 1 |
| GO:0014819 | BP | GO:0014819 | regulation of skeletal muscle contraction | 1/57 | 15/28943 | 0.029143988 | 0.17417624 | 0.13475276 | Actn3 | 1 |
| GO:0030007 | BP | GO:0030007 | cellular potassium ion homeostasis | 1/57 | 15/28943 | 0.029143988 | 0.17417624 | 0.13475276 | Camk2d | 1 |
| GO:0030213 | BP | GO:0030213 | hyaluronan biosynthetic process | 1/57 | 15/28943 | 0.029143988 | 0.17417624 | 0.13475276 | Has1 | 1 |
| GO:0032372 | BP | GO:0032372 | negative regulation of sterol transport | 1/57 | 15/28943 | 0.029143988 | 0.17417624 | 0.13475276 | Shh | 1 |
| GO:0032375 | BP | GO:0032375 | negative regulation of cholesterol transport | 1/57 | 15/28943 | 0.029143988 | 0.17417624 | 0.13475276 | Shh | 1 |
| GO:0035269 | BP | GO:0035269 | protein O-linked mannosylation | 1/57 | 15/28943 | 0.029143988 | 0.17417624 | 0.13475276 | Tmtc4 | 1 |
| GO:0035630 | BP | GO:0035630 | bone mineralization involved in bone maturation | 1/57 | 15/28943 | 0.029143988 | 0.17417624 | 0.13475276 | Actn3 | 1 |
| GO:0043383 | BP | GO:0043383 | negative T cell selection | 1/57 | 15/28943 | 0.029143988 | 0.17417624 | 0.13475276 | Shh | 1 |
| GO:0060442 | BP | GO:0060442 | branching involved in prostate gland morphogenesis | 1/57 | 15/28943 | 0.029143988 | 0.17417624 | 0.13475276 | Shh | 1 |
| GO:0061577 | BP | GO:0061577 | calcium ion transmembrane transport via high voltage-gated calcium channel | 1/57 | 15/28943 | 0.029143988 | 0.17417624 | 0.13475276 | Camk2d | 1 |
| GO:0072074 | BP | GO:0072074 | kidney mesenchyme development | 1/57 | 15/28943 | 0.029143988 | 0.17417624 | 0.13475276 | Shh | 1 |
| GO:1903998 | BP | GO:1903998 | regulation of eating behavior | 1/57 | 15/28943 | 0.029143988 | 0.17417624 | 0.13475276 | Npsr1 | 1 |
| GO:2000650 | BP | GO:2000650 | negative regulation of sodium ion transmembrane transporter activity | 1/57 | 15/28943 | 0.029143988 | 0.17417624 | 0.13475276 | Camk2d | 1 |
| GO:2001053 | BP | GO:2001053 | regulation of mesenchymal cell apoptotic process | 1/57 | 15/28943 | 0.029143988 | 0.17417624 | 0.13475276 | Shh | 1 |
| GO:0090090 | BP | GO:0090090 | negative regulation of canonical Wnt signaling pathway | 2/57 | 135/28943 | 0.029162623 | 0.17417624 | 0.13475276 | Dkk2/Shh | 2 |
| GO:0010811 | BP | GO:0010811 | positive regulation of cell-substrate adhesion | 2/57 | 138/28943 | 0.030364503 | 0.17417624 | 0.13475276 | L1cam/Itga3 | 2 |
| GO:0007265 | BP | GO:0007265 | Ras protein signal transduction | 3/57 | 344/28943 | 0.030384854 | 0.17417624 | 0.13475276 | Camk2d/Itga3/Kitl | 3 |
| GO:0051588 | BP | GO:0051588 | regulation of neurotransmitter transport | 2/57 | 139/28943 | 0.030769474 | 0.17417624 | 0.13475276 | Grin3a/Glra3 | 2 |
| GO:0010226 | BP | GO:0010226 | response to lithium ion | 1/57 | 16/28943 | 0.031056971 | 0.17417624 | 0.13475276 | Shh | 1 |
| GO:0014857 | BP | GO:0014857 | regulation of skeletal muscle cell proliferation | 1/57 | 16/28943 | 0.031056971 | 0.17417624 | 0.13475276 | Shh | 1 |
| GO:0021978 | BP | GO:0021978 | telencephalon regionalization | 1/57 | 16/28943 | 0.031056971 | 0.17417624 | 0.13475276 | Shh | 1 |
| GO:0033084 | BP | GO:0033084 | regulation of immature T cell proliferation in thymus | 1/57 | 16/28943 | 0.031056971 | 0.17417624 | 0.13475276 | Shh | 1 |
| GO:0035112 | BP | GO:0035112 | genitalia morphogenesis | 1/57 | 16/28943 | 0.031056971 | 0.17417624 | 0.13475276 | Shh | 1 |
| GO:0043084 | BP | GO:0043084 | penile erection | 1/57 | 16/28943 | 0.031056971 | 0.17417624 | 0.13475276 | Shh | 1 |
| GO:0044804 | BP | GO:0044804 | autophagy of nucleus | 1/57 | 16/28943 | 0.031056971 | 0.17417624 | 0.13475276 | Atg9b | 1 |
| GO:0051044 | BP | GO:0051044 | positive regulation of membrane protein ectodomain proteolysis | 1/57 | 16/28943 | 0.031056971 | 0.17417624 | 0.13475276 | Gpld1 | 1 |
| GO:0051151 | BP | GO:0051151 | negative regulation of smooth muscle cell differentiation | 1/57 | 16/28943 | 0.031056971 | 0.17417624 | 0.13475276 | Shh | 1 |
| GO:0055119 | BP | GO:0055119 | relaxation of cardiac muscle | 1/57 | 16/28943 | 0.031056971 | 0.17417624 | 0.13475276 | Camk2d | 1 |
| GO:0060979 | BP | GO:0060979 | vasculogenesis involved in coronary vascular morphogenesis | 1/57 | 16/28943 | 0.031056971 | 0.17417624 | 0.13475276 | Shh | 1 |
| GO:0070885 | BP | GO:0070885 | negative regulation of calcineurin-NFAT signaling cascade | 1/57 | 16/28943 | 0.031056971 | 0.17417624 | 0.13475276 | Actn3 | 1 |
| GO:0071371 | BP | GO:0071371 | cellular response to gonadotropin stimulus | 1/57 | 16/28943 | 0.031056971 | 0.17417624 | 0.13475276 | Epha8 | 1 |
| GO:0106057 | BP | GO:0106057 | negative regulation of calcineurin-mediated signaling | 1/57 | 16/28943 | 0.031056971 | 0.17417624 | 0.13475276 | Actn3 | 1 |
| GO:1902306 | BP | GO:1902306 | negative regulation of sodium ion transmembrane transport | 1/57 | 16/28943 | 0.031056971 | 0.17417624 | 0.13475276 | Camk2d | 1 |
| GO:2000252 | BP | GO:2000252 | negative regulation of feeding behavior | 1/57 | 16/28943 | 0.031056971 | 0.17417624 | 0.13475276 | Npsr1 | 1 |
| GO:0030177 | BP | GO:0030177 | positive regulation of Wnt signaling pathway | 2/57 | 140/28943 | 0.0311766 | 0.17417624 | 0.13475276 | Dkk2/Shh | 2 |
| GO:0009855 | BP | GO:0009855 | determination of bilateral symmetry | 2/57 | 141/28943 | 0.031585873 | 0.17417624 | 0.13475276 | Grem2/Shh | 2 |
| GO:1904375 | BP | GO:1904375 | regulation of protein localization to cell periphery | 2/57 | 141/28943 | 0.031585873 | 0.17417624 | 0.13475276 | Camk2d/Itga3 | 2 |
| GO:0070371 | BP | GO:0070371 | ERK1 and ERK2 cascade | 3/57 | 350/28943 | 0.031746322 | 0.17417624 | 0.13475276 | L1cam/Npsr1/Camk2d | 3 |
| GO:0009799 | BP | GO:0009799 | specification of symmetry | 2/57 | 142/28943 | 0.031997281 | 0.17417624 | 0.13475276 | Grem2/Shh | 2 |
| GO:0014902 | BP | GO:0014902 | myotube differentiation | 2/57 | 143/28943 | 0.032410816 | 0.17417624 | 0.13475276 | Actn3/Shh | 2 |
| GO:0021700 | BP | GO:0021700 | developmental maturation | 3/57 | 355/28943 | 0.032905125 | 0.17417624 | 0.13475276 | Actn3/Unc13c/Epha8 | 3 |
| GO:0010896 | BP | GO:0010896 | regulation of triglyceride catabolic process | 1/57 | 17/28943 | 0.032966252 | 0.17417624 | 0.13475276 | Gpld1 | 1 |
| GO:0016322 | BP | GO:0016322 | neuron remodeling | 1/57 | 17/28943 | 0.032966252 | 0.17417624 | 0.13475276 | Epha8 | 1 |
| GO:0033083 | BP | GO:0033083 | regulation of immature T cell proliferation | 1/57 | 17/28943 | 0.032966252 | 0.17417624 | 0.13475276 | Shh | 1 |
| GO:0034497 | BP | GO:0034497 | protein localization to phagophore assembly site | 1/57 | 17/28943 | 0.032966252 | 0.17417624 | 0.13475276 | Atg9b | 1 |
| GO:0034698 | BP | GO:0034698 | response to gonadotropin | 1/57 | 17/28943 | 0.032966252 | 0.17417624 | 0.13475276 | Epha8 | 1 |
| GO:0045059 | BP | GO:0045059 | positive thymic T cell selection | 1/57 | 17/28943 | 0.032966252 | 0.17417624 | 0.13475276 | Shh | 1 |
| GO:0045820 | BP | GO:0045820 | negative regulation of glycolytic process | 1/57 | 17/28943 | 0.032966252 | 0.17417624 | 0.13475276 | Actn3 | 1 |
| GO:0061000 | BP | GO:0061000 | negative regulation of dendritic spine development | 1/57 | 17/28943 | 0.032966252 | 0.17417624 | 0.13475276 | Grin3a | 1 |
| GO:0090136 | BP | GO:0090136 | epithelial cell-cell adhesion | 1/57 | 17/28943 | 0.032966252 | 0.17417624 | 0.13475276 | Plekha7 | 1 |
| GO:0097152 | BP | GO:0097152 | mesenchymal cell apoptotic process | 1/57 | 17/28943 | 0.032966252 | 0.17417624 | 0.13475276 | Shh | 1 |
| GO:0097531 | BP | GO:0097531 | mast cell migration | 1/57 | 17/28943 | 0.032966252 | 0.17417624 | 0.13475276 | Kitl | 1 |
| GO:1902033 | BP | GO:1902033 | regulation of hematopoietic stem cell proliferation | 1/57 | 17/28943 | 0.032966252 | 0.17417624 | 0.13475276 | Kitl | 1 |
| GO:2001028 | BP | GO:2001028 | positive regulation of endothelial cell chemotaxis | 1/57 | 17/28943 | 0.032966252 | 0.17417624 | 0.13475276 | Shh | 1 |
| GO:0006665 | BP | GO:0006665 | sphingolipid metabolic process | 2/57 | 146/28943 | 0.033664085 | 0.17417624 | 0.13475276 | Sptssb/Sgpp2 | 2 |
| GO:0072089 | BP | GO:0072089 | stem cell proliferation | 2/57 | 147/28943 | 0.03408603 | 0.17417624 | 0.13475276 | Kitl/Shh | 2 |
| GO:0090101 | BP | GO:0090101 | negative regulation of transmembrane receptor protein serine/threonine kinase signaling pathway | 2/57 | 147/28943 | 0.03408603 | 0.17417624 | 0.13475276 | Grem2/Vwc2l | 2 |
| GO:0000083 | BP | GO:0000083 | regulation of transcription involved in G1/S transition of mitotic cell cycle | 1/57 | 18/28943 | 0.034871836 | 0.17417624 | 0.13475276 | Cdk18 | 1 |
| GO:0002076 | BP | GO:0002076 | osteoblast development | 1/57 | 18/28943 | 0.034871836 | 0.17417624 | 0.13475276 | Shh | 1 |
| GO:0007398 | BP | GO:0007398 | ectoderm development | 1/57 | 18/28943 | 0.034871836 | 0.17417624 | 0.13475276 | Shh | 1 |
| GO:0010644 | BP | GO:0010644 | cell communication by electrical coupling | 1/57 | 18/28943 | 0.034871836 | 0.17417624 | 0.13475276 | Camk2d | 1 |
| GO:0032785 | BP | GO:0032785 | negative regulation of DNA-templated transcription, elongation | 1/57 | 18/28943 | 0.034871836 | 0.17417624 | 0.13475276 | Shh | 1 |
| GO:0033080 | BP | GO:0033080 | immature T cell proliferation in thymus | 1/57 | 18/28943 | 0.034871836 | 0.17417624 | 0.13475276 | Shh | 1 |
| GO:0033631 | BP | GO:0033631 | cell-cell adhesion mediated by integrin | 1/57 | 18/28943 | 0.034871836 | 0.17417624 | 0.13475276 | L1cam | 1 |
| GO:0035235 | BP | GO:0035235 | ionotropic glutamate receptor signaling pathway | 1/57 | 18/28943 | 0.034871836 | 0.17417624 | 0.13475276 | Grin3a | 1 |
| GO:0035330 | BP | GO:0035330 | regulation of hippo signaling | 1/57 | 18/28943 | 0.034871836 | 0.17417624 | 0.13475276 | Cit | 1 |
| GO:0048368 | BP | GO:0048368 | lateral mesoderm development | 1/57 | 18/28943 | 0.034871836 | 0.17417624 | 0.13475276 | Shh | 1 |
| GO:0060019 | BP | GO:0060019 | radial glial cell differentiation | 1/57 | 18/28943 | 0.034871836 | 0.17417624 | 0.13475276 | Gap43 | 1 |
| GO:0060134 | BP | GO:0060134 | prepulse inhibition | 1/57 | 18/28943 | 0.034871836 | 0.17417624 | 0.13475276 | Grin3a | 1 |
| GO:0060572 | BP | GO:0060572 | morphogenesis of an epithelial bud | 1/57 | 18/28943 | 0.034871836 | 0.17417624 | 0.13475276 | Shh | 1 |
| GO:0099150 | BP | GO:0099150 | regulation of postsynaptic specialization assembly | 1/57 | 18/28943 | 0.034871836 | 0.17417624 | 0.13475276 | Gap43 | 1 |
| GO:1990806 | BP | GO:1990806 | ligand-gated ion channel signaling pathway | 1/57 | 18/28943 | 0.034871836 | 0.17417624 | 0.13475276 | Grin3a | 1 |
| GO:0050671 | BP | GO:0050671 | positive regulation of lymphocyte proliferation | 2/57 | 149/28943 | 0.034936147 | 0.17417624 | 0.13475276 | Kitl/Shh | 2 |
| GO:0097306 | BP | GO:0097306 | cellular response to alcohol | 2/57 | 151/28943 | 0.035794502 | 0.177568258 | 0.13737702 | Glra3/Gpld1 | 2 |
| GO:0015698 | BP | GO:0015698 | inorganic anion transport | 2/57 | 152/28943 | 0.036226745 | 0.177568258 | 0.13737702 | Glra3/Prkg2 | 2 |
| GO:0032946 | BP | GO:0032946 | positive regulation of mononuclear cell proliferation | 2/57 | 152/28943 | 0.036226745 | 0.177568258 | 0.13737702 | Kitl/Shh | 2 |
| GO:0031589 | BP | GO:0031589 | cell-substrate adhesion | 3/57 | 371/28943 | 0.036760748 | 0.177568258 | 0.13737702 | L1cam/Actn3/Itga3 | 3 |
| GO:0010867 | BP | GO:0010867 | positive regulation of triglyceride biosynthetic process | 1/57 | 19/28943 | 0.03677373 | 0.177568258 | 0.13737702 | Gpld1 | 1 |
| GO:0021924 | BP | GO:0021924 | cell proliferation in external granule layer | 1/57 | 19/28943 | 0.03677373 | 0.177568258 | 0.13737702 | Shh | 1 |
| GO:0021930 | BP | GO:0021930 | cerebellar granule cell precursor proliferation | 1/57 | 19/28943 | 0.03677373 | 0.177568258 | 0.13737702 | Shh | 1 |
| GO:0033079 | BP | GO:0033079 | immature T cell proliferation | 1/57 | 19/28943 | 0.03677373 | 0.177568258 | 0.13737702 | Shh | 1 |
| GO:0035457 | BP | GO:0035457 | cellular response to interferon-alpha | 1/57 | 19/28943 | 0.03677373 | 0.177568258 | 0.13737702 | Ifit2 | 1 |
| GO:0016052 | BP | GO:0016052 | carbohydrate catabolic process | 2/57 | 154/28943 | 0.037097317 | 0.178506601 | 0.138102976 | Actn3/Pygm | 2 |
| GO:0051147 | BP | GO:0051147 | regulation of muscle cell differentiation | 2/57 | 157/28943 | 0.038418246 | 0.181037129 | 0.140060739 | Actn3/Shh | 2 |
| GO:0014856 | BP | GO:0014856 | skeletal muscle cell proliferation | 1/57 | 20/28943 | 0.038671943 | 0.181037129 | 0.140060739 | Shh | 1 |
| GO:0021534 | BP | GO:0021534 | cell proliferation in hindbrain | 1/57 | 20/28943 | 0.038671943 | 0.181037129 | 0.140060739 | Shh | 1 |
| GO:0035268 | BP | GO:0035268 | protein mannosylation | 1/57 | 20/28943 | 0.038671943 | 0.181037129 | 0.140060739 | Tmtc4 | 1 |
| GO:0036120 | BP | GO:0036120 | cellular response to platelet-derived growth factor stimulus | 1/57 | 20/28943 | 0.038671943 | 0.181037129 | 0.140060739 | Has1 | 1 |
| GO:0048557 | BP | GO:0048557 | embryonic digestive tract morphogenesis | 1/57 | 20/28943 | 0.038671943 | 0.181037129 | 0.140060739 | Shh | 1 |
| GO:0071397 | BP | GO:0071397 | cellular response to cholesterol | 1/57 | 20/28943 | 0.038671943 | 0.181037129 | 0.140060739 | Gpld1 | 1 |
| GO:0072189 | BP | GO:0072189 | ureter development | 1/57 | 20/28943 | 0.038671943 | 0.181037129 | 0.140060739 | Shh | 1 |
| GO:0010720 | BP | GO:0010720 | positive regulation of cell development | 3/57 | 384/28943 | 0.040057761 | 0.184283911 | 0.142572636 | L1cam/Actn3/Shh | 3 |
| GO:0072006 | BP | GO:0072006 | nephron development | 2/57 | 161/28943 | 0.040207228 | 0.184283911 | 0.142572636 | Itga3/Shh | 2 |
| GO:0006089 | BP | GO:0006089 | lactate metabolic process | 1/57 | 21/28943 | 0.04056648 | 0.184283911 | 0.142572636 | Actn3 | 1 |
| GO:0010766 | BP | GO:0010766 | negative regulation of sodium ion transport | 1/57 | 21/28943 | 0.04056648 | 0.184283911 | 0.142572636 | Camk2d | 1 |
| GO:0021513 | BP | GO:0021513 | spinal cord dorsal/ventral patterning | 1/57 | 21/28943 | 0.04056648 | 0.184283911 | 0.142572636 | Shh | 1 |
| GO:0035234 | BP | GO:0035234 | ectopic germ cell programmed cell death | 1/57 | 21/28943 | 0.04056648 | 0.184283911 | 0.142572636 | Kitl | 1 |
| GO:0061469 | BP | GO:0061469 | regulation of type B pancreatic cell proliferation | 1/57 | 21/28943 | 0.04056648 | 0.184283911 | 0.142572636 | Sgpp2 | 1 |
| GO:0097502 | BP | GO:0097502 | mannosylation | 1/57 | 21/28943 | 0.04056648 | 0.184283911 | 0.142572636 | Tmtc4 | 1 |
| GO:0099558 | BP | GO:0099558 | maintenance of synapse structure | 1/57 | 21/28943 | 0.04056648 | 0.184283911 | 0.142572636 | Cbln4 | 1 |
| GO:0010039 | BP | GO:0010039 | response to iron ion | 1/57 | 22/28943 | 0.042457349 | 0.185061754 | 0.14317442 | Gpld1 | 1 |
| GO:0034312 | BP | GO:0034312 | diol biosynthetic process | 1/57 | 22/28943 | 0.042457349 | 0.185061754 | 0.14317442 | Sptssb | 1 |
| GO:0045217 | BP | GO:0045217 | cell-cell junction maintenance | 1/57 | 22/28943 | 0.042457349 | 0.185061754 | 0.14317442 | Plekha7 | 1 |
| GO:0046931 | BP | GO:0046931 | pore complex assembly | 1/57 | 22/28943 | 0.042457349 | 0.185061754 | 0.14317442 | Plekha7 | 1 |
| GO:0048791 | BP | GO:0048791 | calcium ion-regulated exocytosis of neurotransmitter | 1/57 | 22/28943 | 0.042457349 | 0.185061754 | 0.14317442 | Unc13c | 1 |
| GO:0050849 | BP | GO:0050849 | negative regulation of calcium-mediated signaling | 1/57 | 22/28943 | 0.042457349 | 0.185061754 | 0.14317442 | Actn3 | 1 |
| GO:0060438 | BP | GO:0060438 | trachea development | 1/57 | 22/28943 | 0.042457349 | 0.185061754 | 0.14317442 | Shh | 1 |
| GO:0060602 | BP | GO:0060602 | branch elongation of an epithelium | 1/57 | 22/28943 | 0.042457349 | 0.185061754 | 0.14317442 | Shh | 1 |
| GO:0072111 | BP | GO:0072111 | cell proliferation involved in kidney development | 1/57 | 22/28943 | 0.042457349 | 0.185061754 | 0.14317442 | Shh | 1 |
| GO:1903672 | BP | GO:1903672 | positive regulation of sprouting angiogenesis | 1/57 | 22/28943 | 0.042457349 | 0.185061754 | 0.14317442 | Shh | 1 |
| GO:0010675 | BP | GO:0010675 | regulation of cellular carbohydrate metabolic process | 2/57 | 167/28943 | 0.042948963 | 0.185061754 | 0.14317442 | Gpld1/Actn3 | 2 |
| GO:0070665 | BP | GO:0070665 | positive regulation of leukocyte proliferation | 2/57 | 168/28943 | 0.043412599 | 0.185061754 | 0.14317442 | Kitl/Shh | 2 |
| GO:0005980 | BP | GO:0005980 | glycogen catabolic process | 1/57 | 23/28943 | 0.044344557 | 0.185061754 | 0.14317442 | Pygm | 1 |
| GO:0007625 | BP | GO:0007625 | grooming behavior | 1/57 | 23/28943 | 0.044344557 | 0.185061754 | 0.14317442 | Cntnap4 | 1 |
| GO:0010666 | BP | GO:0010666 | positive regulation of cardiac muscle cell apoptotic process | 1/57 | 23/28943 | 0.044344557 | 0.185061754 | 0.14317442 | Camk2d | 1 |
| GO:0010880 | BP | GO:0010880 | regulation of release of sequestered calcium ion into cytosol by sarcoplasmic reticulum | 1/57 | 23/28943 | 0.044344557 | 0.185061754 | 0.14317442 | Camk2d | 1 |
| GO:0010984 | BP | GO:0010984 | regulation of lipoprotein particle clearance | 1/57 | 23/28943 | 0.044344557 | 0.185061754 | 0.14317442 | Gpld1 | 1 |
| GO:0021511 | BP | GO:0021511 | spinal cord patterning | 1/57 | 23/28943 | 0.044344557 | 0.185061754 | 0.14317442 | Shh | 1 |
| GO:0030539 | BP | GO:0030539 | male genitalia development | 1/57 | 23/28943 | 0.044344557 | 0.185061754 | 0.14317442 | Shh | 1 |
| GO:0036119 | BP | GO:0036119 | response to platelet-derived growth factor | 1/57 | 23/28943 | 0.044344557 | 0.185061754 | 0.14317442 | Has1 | 1 |
| GO:0042481 | BP | GO:0042481 | regulation of odontogenesis | 1/57 | 23/28943 | 0.044344557 | 0.185061754 | 0.14317442 | Shh | 1 |
| GO:0043501 | BP | GO:0043501 | skeletal muscle adaptation | 1/57 | 23/28943 | 0.044344557 | 0.185061754 | 0.14317442 | Actn3 | 1 |
| GO:0051043 | BP | GO:0051043 | regulation of membrane protein ectodomain proteolysis | 1/57 | 23/28943 | 0.044344557 | 0.185061754 | 0.14317442 | Gpld1 | 1 |
| GO:1900120 | BP | GO:1900120 | regulation of receptor binding | 1/57 | 23/28943 | 0.044344557 | 0.185061754 | 0.14317442 | Grem2 | 1 |
| GO:1903579 | BP | GO:1903579 | negative regulation of ATP metabolic process | 1/57 | 23/28943 | 0.044344557 | 0.185061754 | 0.14317442 | Actn3 | 1 |
| GO:2001026 | BP | GO:2001026 | regulation of endothelial cell chemotaxis | 1/57 | 23/28943 | 0.044344557 | 0.185061754 | 0.14317442 | Shh | 1 |
| GO:0055067 | BP | GO:0055067 | monovalent inorganic cation homeostasis | 2/57 | 171/28943 | 0.044814781 | 0.185061754 | 0.14317442 | Kcnj16/Camk2d | 2 |
| GO:0062013 | BP | GO:0062013 | positive regulation of small molecule metabolic process | 2/57 | 172/28943 | 0.045285903 | 0.185061754 | 0.14317442 | Gpld1/Actn3 | 2 |
| GO:0006941 | BP | GO:0006941 | striated muscle contraction | 2/57 | 173/28943 | 0.045758875 | 0.185061754 | 0.14317442 | Camk2d/Actn3 | 2 |
| GO:0002320 | BP | GO:0002320 | lymphoid progenitor cell differentiation | 1/57 | 24/28943 | 0.04622811 | 0.185061754 | 0.14317442 | Shh | 1 |
| GO:0006007 | BP | GO:0006007 | glucose catabolic process | 1/57 | 24/28943 | 0.04622811 | 0.185061754 | 0.14317442 | Actn3 | 1 |
| GO:0009251 | BP | GO:0009251 | glucan catabolic process | 1/57 | 24/28943 | 0.04622811 | 0.185061754 | 0.14317442 | Pygm | 1 |
| GO:0010663 | BP | GO:0010663 | positive regulation of striated muscle cell apoptotic process | 1/57 | 24/28943 | 0.04622811 | 0.185061754 | 0.14317442 | Camk2d | 1 |
| GO:0018230 | BP | GO:0018230 | peptidyl-L-cysteine S-palmitoylation | 1/57 | 24/28943 | 0.04622811 | 0.185061754 | 0.14317442 | Zdhhc22 | 1 |
| GO:0018231 | BP | GO:0018231 | peptidyl-S-diacylglycerol-L-cysteine biosynthetic process from peptidyl-cysteine | 1/57 | 24/28943 | 0.04622811 | 0.185061754 | 0.14317442 | Zdhhc22 | 1 |
| GO:0033033 | BP | GO:0033033 | negative regulation of myeloid cell apoptotic process | 1/57 | 24/28943 | 0.04622811 | 0.185061754 | 0.14317442 | Kitl | 1 |
| GO:0043369 | BP | GO:0043369 | CD4-positive or CD8-positive, alpha-beta T cell lineage commitment | 1/57 | 24/28943 | 0.04622811 | 0.185061754 | 0.14317442 | Shh | 1 |
| GO:0043586 | BP | GO:0043586 | tongue development | 1/57 | 24/28943 | 0.04622811 | 0.185061754 | 0.14317442 | Shh | 1 |
| GO:0044247 | BP | GO:0044247 | cellular polysaccharide catabolic process | 1/57 | 24/28943 | 0.04622811 | 0.185061754 | 0.14317442 | Pygm | 1 |
| GO:0060457 | BP | GO:0060457 | negative regulation of digestive system process | 1/57 | 24/28943 | 0.04622811 | 0.185061754 | 0.14317442 | Npsr1 | 1 |
| GO:0007178 | BP | GO:0007178 | transmembrane receptor protein serine/threonine kinase signaling pathway | 3/57 | 407/28943 | 0.046247229 | 0.185061754 | 0.14317442 | Grem2/Vwc2l/Itga3 | 3 |
| GO:0010594 | BP | GO:0010594 | regulation of endothelial cell migration | 2/57 | 176/28943 | 0.047188795 | 0.185061754 | 0.14317442 | Gpld1/Shh | 2 |
| GO:0007159 | BP | GO:0007159 | leukocyte cell-cell adhesion | 3/57 | 411/28943 | 0.047369595 | 0.185061754 | 0.14317442 | L1cam/Kitl/Shh | 3 |
| GO:0007413 | BP | GO:0007413 | axonal fasciculation | 1/57 | 25/28943 | 0.048108016 | 0.185061754 | 0.14317442 | L1cam | 1 |
| GO:0007620 | BP | GO:0007620 | copulation | 1/57 | 25/28943 | 0.048108016 | 0.185061754 | 0.14317442 | Shh | 1 |
| GO:0008209 | BP | GO:0008209 | androgen metabolic process | 1/57 | 25/28943 | 0.048108016 | 0.185061754 | 0.14317442 | Shh | 1 |
| GO:0010866 | BP | GO:0010866 | regulation of triglyceride biosynthetic process | 1/57 | 25/28943 | 0.048108016 | 0.185061754 | 0.14317442 | Gpld1 | 1 |
| GO:0014808 | BP | GO:0014808 | release of sequestered calcium ion into cytosol by sarcoplasmic reticulum | 1/57 | 25/28943 | 0.048108016 | 0.185061754 | 0.14317442 | Camk2d | 1 |
| GO:0035024 | BP | GO:0035024 | negative regulation of Rho protein signal transduction | 1/57 | 25/28943 | 0.048108016 | 0.185061754 | 0.14317442 | Itga3 | 1 |
| GO:0035988 | BP | GO:0035988 | chondrocyte proliferation | 1/57 | 25/28943 | 0.048108016 | 0.185061754 | 0.14317442 | Prkg2 | 1 |
| GO:0036315 | BP | GO:0036315 | cellular response to sterol | 1/57 | 25/28943 | 0.048108016 | 0.185061754 | 0.14317442 | Gpld1 | 1 |
| GO:0044331 | BP | GO:0044331 | cell-cell adhesion mediated by cadherin | 1/57 | 25/28943 | 0.048108016 | 0.185061754 | 0.14317442 | Plekha7 | 1 |
| GO:0097062 | BP | GO:0097062 | dendritic spine maintenance | 1/57 | 25/28943 | 0.048108016 | 0.185061754 | 0.14317442 | Itga3 | 1 |
| GO:0106030 | BP | GO:0106030 | neuron projection fasciculation | 1/57 | 25/28943 | 0.048108016 | 0.185061754 | 0.14317442 | L1cam | 1 |
| GO:1900543 | BP | GO:1900543 | negative regulation of purine nucleotide metabolic process | 1/57 | 25/28943 | 0.048108016 | 0.185061754 | 0.14317442 | Actn3 | 1 |
| GO:0006869 | BP | GO:0006869 | lipid transport | 3/57 | 419/28943 | 0.049654697 | 0.188513585 | 0.145844955 | Proca1/Atg9b/Shh | 3 |
| GO:0002082 | BP | GO:0002082 | regulation of oxidative phosphorylation | 1/57 | 26/28943 | 0.049984281 | 0.188513585 | 0.145844955 | Actn3 | 1 |
| GO:0016082 | BP | GO:0016082 | synaptic vesicle priming | 1/57 | 26/28943 | 0.049984281 | 0.188513585 | 0.145844955 | Unc13c | 1 |
| GO:0035020 | BP | GO:0035020 | regulation of Rac protein signal transduction | 1/57 | 26/28943 | 0.049984281 | 0.188513585 | 0.145844955 | Camk2d | 1 |
| GO:0070723 | BP | GO:0070723 | response to cholesterol | 1/57 | 26/28943 | 0.049984281 | 0.188513585 | 0.145844955 | Gpld1 | 1 |
| GO:0071467 | BP | GO:0071467 | cellular response to pH | 1/57 | 26/28943 | 0.049984281 | 0.188513585 | 0.145844955 | Gpld1 | 1 |
| GO:1903514 | BP | GO:1903514 | release of sequestered calcium ion into cytosol by endoplasmic reticulum | 1/57 | 26/28943 | 0.049984281 | 0.188513585 | 0.145844955 | Camk2d | 1 |
| GO:0097060 | CC | GO:0097060 | synaptic membrane | 8/57 | 469/28804 | 3.82E-06 | 0.000539016 | 0.000338017 | Cntnap4/Grin3a/L1cam/Glra3/Unc13c/Itga3/Ank1/Kctd8 | 8 |
| GO:0031527 | CC | GO:0031527 | filopodium membrane | 2/57 | 17/28804 | 0.000513358 | 0.033632543 | 0.021090957 | Gap43/Itga3 | 2 |
| GO:0043195 | CC | GO:0043195 | terminal bouton | 3/57 | 88/28804 | 0.000715586 | 0.033632543 | 0.021090957 | Prph/L1cam/Unc13c | 3 |
| GO:0030175 | CC | GO:0030175 | filopodium | 3/57 | 99/28804 | 0.001007194 | 0.035503589 | 0.022264288 | Gap43/Itga3/Kitl | 3 |
| GO:0098982 | CC | GO:0098982 | GABA-ergic synapse | 3/57 | 109/28804 | 0.001329366 | 0.037488133 | 0.023508795 | Cbln4/Cntnap4/Gap43 | 3 |
| GO:0043235 | CC | GO:0043235 | receptor complex | 5/57 | 430/28804 | 0.001603288 | 0.037677279 | 0.023627409 | Grin3a/Vwc2l/Itga3/Epha8/Kctd8 | 5 |
| GO:0030018 | CC | GO:0030018 | Z disc | 3/57 | 131/28804 | 0.00224842 | 0.0452896 | 0.028401093 | Actn3/Pygm/Ank1 | 3 |
| GO:0031674 | CC | GO:0031674 | I band | 3/57 | 144/28804 | 0.002938925 | 0.046656859 | 0.029258501 | Actn3/Pygm/Ank1 | 3 |
| GO:0008328 | CC | GO:0008328 | ionotropic glutamate receptor complex | 2/57 | 44/28804 | 0.003450576 | 0.046656859 | 0.029258501 | Grin3a/Vwc2l | 2 |
| GO:0031253 | CC | GO:0031253 | cell projection membrane | 4/57 | 320/28804 | 0.003717492 | 0.046656859 | 0.029258501 | Prph/Gap43/Itga3/Ank1 | 4 |
| GO:0098878 | CC | GO:0098878 | neurotransmitter receptor complex | 2/57 | 46/28804 | 0.003765656 | 0.046656859 | 0.029258501 | Grin3a/Vwc2l | 2 |
| GO:0045211 | CC | GO:0045211 | postsynaptic membrane | 4/57 | 326/28804 | 0.003970797 | 0.046656859 | 0.029258501 | Grin3a/Glra3/Ank1/Kctd8 | 4 |
| GO:0042383 | CC | GO:0042383 | sarcolemma | 3/57 | 166/28804 | 0.004378584 | 0.047490793 | 0.02978146 | Camk2d/Kcnj12/Ank1 | 3 |
| GO:0150034 | CC | GO:0150034 | distal axon | 4/57 | 379/28804 | 0.006733156 | 0.058183896 | 0.036487102 | Prph/L1cam/Unc13c/Itga3 | 4 |
| GO:0043679 | CC | GO:0043679 | axon terminus | 3/57 | 194/28804 | 0.006739956 | 0.058183896 | 0.036487102 | Prph/L1cam/Unc13c | 3 |
| GO:0030017 | CC | GO:0030017 | sarcomere | 3/57 | 198/28804 | 0.007128083 | 0.058183896 | 0.036487102 | Actn3/Pygm/Ank1 | 3 |
| GO:0098802 | CC | GO:0098802 | plasma membrane signaling receptor complex | 3/57 | 199/28804 | 0.007227148 | 0.058183896 | 0.036487102 | Grin3a/Vwc2l/Itga3 | 3 |
| GO:0042734 | CC | GO:0042734 | presynaptic membrane | 3/57 | 201/28804 | 0.007427731 | 0.058183896 | 0.036487102 | Cntnap4/L1cam/Unc13c | 3 |
| GO:0030315 | CC | GO:0030315 | T-tubule | 2/57 | 70/28804 | 0.008523918 | 0.059919371 | 0.037575417 | Camk2d/Kcnj12 | 2 |
| GO:0044306 | CC | GO:0044306 | neuron projection terminus | 3/57 | 215/28804 | 0.008924341 | 0.059919371 | 0.037575417 | Prph/L1cam/Unc13c | 3 |
| GO:0030016 | CC | GO:0030016 | myofibril | 3/57 | 223/28804 | 0.009853255 | 0.059919371 | 0.037575417 | Actn3/Pygm/Ank1 | 3 |
| GO:0016529 | CC | GO:0016529 | sarcoplasmic reticulum | 2/57 | 76/28804 | 0.009983418 | 0.059919371 | 0.037575417 | Pygm/Ank1 | 2 |
| GO:0099699 | CC | GO:0099699 | integral component of synaptic membrane | 3/57 | 227/28804 | 0.010338087 | 0.059919371 | 0.037575417 | Cntnap4/Grin3a/Glra3 | 3 |
| GO:0098858 | CC | GO:0098858 | actin-based cell projection | 3/57 | 229/28804 | 0.01058563 | 0.059919371 | 0.037575417 | Gap43/Itga3/Kitl | 3 |
| GO:0060076 | CC | GO:0060076 | excitatory synapse | 2/57 | 79/28804 | 0.010751852 | 0.059919371 | 0.037575417 | Unc13c/Itga3 | 2 |
| GO:0099572 | CC | GO:0099572 | postsynaptic specialization | 4/57 | 438/28804 | 0.011048962 | 0.059919371 | 0.037575417 | Grin3a/Glra3/Gap43/Adgra1 | 4 |
| GO:0043292 | CC | GO:0043292 | contractile fiber | 3/57 | 236/28804 | 0.011479097 | 0.059946398 | 0.037592366 | Actn3/Pygm/Ank1 | 3 |
| GO:0044304 | CC | GO:0044304 | main axon | 2/57 | 84/28804 | 0.012088779 | 0.060875637 | 0.038175091 | Camk2d/Ank1 | 2 |
| GO:0099240 | CC | GO:0099240 | intrinsic component of synaptic membrane | 3/57 | 247/28804 | 0.012968848 | 0.063055433 | 0.039542041 | Cntnap4/Grin3a/Glra3 | 3 |
| GO:0016528 | CC | GO:0016528 | sarcoplasm | 2/57 | 98/28804 | 0.016194621 | 0.075083698 | 0.047084962 | Pygm/Ank1 | 2 |
| GO:0031594 | CC | GO:0031594 | neuromuscular junction | 2/57 | 99/28804 | 0.016507763 | 0.075083698 | 0.047084962 | Camk2d/Unc13c | 2 |
| GO:0099060 | CC | GO:0099060 | integral component of postsynaptic specialization membrane | 2/57 | 108/28804 | 0.019441239 | 0.08566296 | 0.053719213 | Grin3a/Glra3 | 2 |
| GO:0034702 | CC | GO:0034702 | ion channel complex | 3/57 | 295/28804 | 0.020718984 | 0.08688715 | 0.054486902 | Grin3a/Glra3/Vwc2l | 3 |
| GO:0098948 | CC | GO:0098948 | intrinsic component of postsynaptic specialization membrane | 2/57 | 114/28804 | 0.021509458 | 0.08688715 | 0.054486902 | Grin3a/Glra3 | 2 |
| GO:0005938 | CC | GO:0005938 | cell cortex | 3/57 | 306/28804 | 0.022784959 | 0.08688715 | 0.054486902 | Actn3/Unc13c/Ank1 | 3 |
| GO:0002178 | CC | GO:0002178 | palmitoyltransferase complex | 1/57 | 12/28804 | 0.02349438 | 0.08688715 | 0.054486902 | Sptssb | 1 |
| GO:0005883 | CC | GO:0005883 | neurofilament | 1/57 | 12/28804 | 0.02349438 | 0.08688715 | 0.054486902 | Prph | 1 |
| GO:0044294 | CC | GO:0044294 | dendritic growth cone | 1/57 | 12/28804 | 0.02349438 | 0.08688715 | 0.054486902 | L1cam | 1 |
| GO:0030863 | CC | GO:0030863 | cortical cytoskeleton | 2/57 | 121/28804 | 0.024032616 | 0.08688715 | 0.054486902 | Actn3/Ank1 | 2 |
| GO:0042622 | CC | GO:0042622 | photoreceptor outer segment membrane | 1/57 | 13/28804 | 0.025427584 | 0.089632235 | 0.056208345 | Prph | 1 |
| GO:0098690 | CC | GO:0098690 | glycinergic synapse | 1/57 | 14/28804 | 0.027357029 | 0.094081489 | 0.05899847 | Glra3 | 1 |
| GO:0099634 | CC | GO:0099634 | postsynaptic specialization membrane | 2/57 | 138/28804 | 0.030633233 | 0.102840139 | 0.064491017 | Grin3a/Glra3 | 2 |
| GO:0005912 | CC | GO:0005912 | adherens junction | 2/57 | 142/28804 | 0.032279701 | 0.105847391 | 0.066376863 | Cdh20/Plekha7 | 2 |
| GO:0031430 | CC | GO:0031430 | M band | 1/57 | 19/28804 | 0.036948098 | 0.114136948 | 0.071575242 | Ank1 | 1 |
| GO:1902495 | CC | GO:1902495 | transmembrane transporter complex | 3/57 | 373/28804 | 0.037708542 | 0.114136948 | 0.071575242 | Grin3a/Glra3/Vwc2l | 3 |
| GO:0030673 | CC | GO:0030673 | axolemma | 1/57 | 20/28804 | 0.038855131 | 0.114136948 | 0.071575242 | Ank1 | 1 |
| GO:0044292 | CC | GO:0044292 | dendrite terminus | 1/57 | 20/28804 | 0.038855131 | 0.114136948 | 0.071575242 | L1cam | 1 |
| GO:0098831 | CC | GO:0098831 | presynaptic active zone cytoplasmic component | 1/57 | 20/28804 | 0.038855131 | 0.114136948 | 0.071575242 | Unc13c | 1 |
| GO:0097730 | CC | GO:0097730 | non-motile cilium | 2/57 | 166/28804 | 0.042856197 | 0.118997584 | 0.074623345 | Prph/Qrfpr | 2 |
| GO:1990351 | CC | GO:1990351 | transporter complex | 3/57 | 395/28804 | 0.043474443 | 0.118997584 | 0.074623345 | Grin3a/Glra3/Vwc2l | 3 |
| GO:0014069 | CC | GO:0014069 | postsynaptic density | 3/57 | 398/28804 | 0.044293205 | 0.118997584 | 0.074623345 | Grin3a/Gap43/Adgra1 | 3 |
| GO:0005865 | CC | GO:0005865 | striated muscle thin filament | 1/57 | 23/28804 | 0.044553999 | 0.118997584 | 0.074623345 | Actn3 | 1 |
| GO:0099055 | CC | GO:0099055 | integral component of postsynaptic membrane | 2/57 | 170/28804 | 0.044729588 | 0.118997584 | 0.074623345 | Grin3a/Glra3 | 2 |
| GO:0032398 | CC | GO:0032398 | MHC class Ib protein complex | 1/57 | 24/28804 | 0.046446234 | 0.119245834 | 0.074779022 | H2-Q2 | 1 |
| GO:0032279 | CC | GO:0032279 | asymmetric synapse | 3/57 | 406/28804 | 0.046514332 | 0.119245834 | 0.074779022 | Grin3a/Gap43/Adgra1 | 3 |
| GO:0031252 | CC | GO:0031252 | cell leading edge | 3/57 | 409/28804 | 0.047361353 | 0.119249121 | 0.074781083 | Kitl/Cit/Ank1 | 3 |
| GO:0098936 | CC | GO:0098936 | intrinsic component of postsynaptic membrane | 2/57 | 180/28804 | 0.049543255 | 0.12001649 | 0.0752623 | Grin3a/Glra3 | 2 |
| GO:0030165 | MF | GO:0030165 | PDZ domain binding | 5/57 | 122/28404 | 4.71E-06 | 0.000824962 | 0.000486294 | Cntnap4/L1cam/Kcnj12/Cit/Cxxc4 | 5 |
| GO:0015276 | MF | GO:0015276 | ligand-gated ion channel activity | 4/57 | 137/28404 | 0.000167794 | 0.010347983 | 0.006099864 | Grin3a/Glra3/Kcnj16/Kcnj12 | 4 |
| GO:0022834 | MF | GO:0022834 | ligand-gated channel activity | 4/57 | 139/28404 | 0.000177394 | 0.010347983 | 0.006099864 | Grin3a/Glra3/Kcnj16/Kcnj12 | 4 |
| GO:0016594 | MF | GO:0016594 | glycine binding | 2/57 | 14/28404 | 0.000354514 | 0.015509981 | 0.009142725 | Grin3a/Glra3 | 2 |
| GO:0008081 | MF | GO:0008081 | phosphoric diester hydrolase activity | 3/57 | 86/28404 | 0.00069676 | 0.024386595 | 0.014375256 | Plch1/Gpld1/Plcxd3 | 3 |
| GO:0005242 | MF | GO:0005242 | inward rectifier potassium channel activity | 2/57 | 23/28404 | 0.000974258 | 0.025450944 | 0.015002662 | Kcnj16/Kcnj12 | 2 |
| GO:0004620 | MF | GO:0004620 | phospholipase activity | 3/57 | 98/28404 | 0.001018038 | 0.025450944 | 0.015002662 | Plch1/Gpld1/Proca1 | 3 |
| GO:0099094 | MF | GO:0099094 | ligand-gated cation channel activity | 3/57 | 104/28404 | 0.001208571 | 0.02643749 | 0.015584205 | Grin3a/Kcnj16/Kcnj12 | 3 |
| GO:0043236 | MF | GO:0043236 | laminin binding | 2/57 | 29/28404 | 0.001551401 | 0.030166132 | 0.017782141 | Itga3/Shh | 2 |
| GO:0016298 | MF | GO:0016298 | lipase activity | 3/57 | 123/28404 | 0.001955088 | 0.034214048 | 0.020168281 | Plch1/Gpld1/Proca1 | 3 |
| GO:0016409 | MF | GO:0016409 | palmitoyltransferase activity | 2/57 | 37/28404 | 0.002518852 | 0.03673326 | 0.02165329 | Zdhhc22/Sptssb | 2 |
| GO:0017080 | MF | GO:0017080 | sodium channel regulator activity | 2/57 | 37/28404 | 0.002518852 | 0.03673326 | 0.02165329 | Gpld1/Camk2d | 2 |
| GO:0008188 | MF | GO:0008188 | neuropeptide receptor activity | 2/57 | 42/28404 | 0.003235494 | 0.03999673 | 0.02357702 | Npsr1/Qrfpr | 2 |
| GO:0044325 | MF | GO:0044325 | transmembrane transporter binding | 3/57 | 148/28404 | 0.003301393 | 0.03999673 | 0.02357702 | Camk2d/Actn3/Ank1 | 3 |
| GO:0022843 | MF | GO:0022843 | voltage-gated cation channel activity | 3/57 | 150/28404 | 0.003428291 | 0.03999673 | 0.02357702 | Grin3a/Kcnj16/Kcnj12 | 3 |
| GO:0022836 | MF | GO:0022836 | gated channel activity | 4/57 | 328/28404 | 0.0042628 | 0.046282491 | 0.02728231 | Grin3a/Glra3/Kcnj16/Kcnj12 | 4 |
| GO:0042578 | MF | GO:0042578 | phosphoric ester hydrolase activity | 4/57 | 353/28404 | 0.005518859 | 0.046282491 | 0.02728231 | Plch1/Gpld1/Plcxd3/Sgpp2 | 4 |
| GO:0050840 | MF | GO:0050840 | extracellular matrix binding | 2/57 | 57/28404 | 0.005883136 | 0.046282491 | 0.02728231 | Itga3/Shh | 2 |
| GO:0031406 | MF | GO:0031406 | carboxylic acid binding | 3/57 | 183/28404 | 0.005963799 | 0.046282491 | 0.02728231 | Grin3a/L1cam/Glra3 | 3 |
| GO:1904315 | MF | GO:1904315 | transmitter-gated ion channel activity involved in regulation of postsynaptic membrane potential | 2/57 | 59/28404 | 0.006290896 | 0.046282491 | 0.02728231 | Grin3a/Glra3 | 2 |
| GO:0005516 | MF | GO:0005516 | calmodulin binding | 3/57 | 191/28404 | 0.006709301 | 0.046282491 | 0.02728231 | Camk2d/Gap43/Unc13c | 3 |
| GO:0022824 | MF | GO:0022824 | transmitter-gated ion channel activity | 2/57 | 61/28404 | 0.006711203 | 0.046282491 | 0.02728231 | Grin3a/Glra3 | 2 |
| GO:0022835 | MF | GO:0022835 | transmitter-gated channel activity | 2/57 | 61/28404 | 0.006711203 | 0.046282491 | 0.02728231 | Grin3a/Glra3 | 2 |
| GO:0099529 | MF | GO:0099529 | neurotransmitter receptor activity involved in regulation of postsynaptic membrane potential | 2/57 | 62/28404 | 0.006926029 | 0.046282491 | 0.02728231 | Grin3a/Glra3 | 2 |
| GO:0016758 | MF | GO:0016758 | hexosyltransferase activity | 3/57 | 194/28404 | 0.007002523 | 0.046282491 | 0.02728231 | Has1/Tmtc4/Pygm | 3 |
| GO:0005244 | MF | GO:0005244 | voltage-gated ion channel activity | 3/57 | 197/28404 | 0.007303269 | 0.046282491 | 0.02728231 | Grin3a/Kcnj16/Kcnj12 | 3 |
| GO:0004860 | MF | GO:0004860 | protein kinase inhibitor activity | 2/57 | 64/28404 | 0.007364962 | 0.046282491 | 0.02728231 | Cit/Camk2n2 | 2 |
| GO:0022832 | MF | GO:0022832 | voltage-gated channel activity | 3/57 | 198/28404 | 0.007405199 | 0.046282491 | 0.02728231 | Grin3a/Kcnj16/Kcnj12 | 3 |
| GO:0016597 | MF | GO:0016597 | amino acid binding | 2/57 | 69/28404 | 0.00851584 | 0.049675733 | 0.029282537 | Grin3a/Glra3 | 2 |
| GO:0019210 | MF | GO:0019210 | kinase inhibitor activity | 2/57 | 69/28404 | 0.00851584 | 0.049675733 | 0.029282537 | Cit/Camk2n2 | 2 |
| GO:0005230 | MF | GO:0005230 | extracellular ligand-gated ion channel activity | 2/57 | 71/28404 | 0.008997342 | 0.050791445 | 0.02994022 | Grin3a/Glra3 | 2 |
| GO:0098960 | MF | GO:0098960 | postsynaptic neurotransmitter receptor activity | 2/57 | 76/28404 | 0.010253093 | 0.056071601 | 0.033052733 | Grin3a/Glra3 | 2 |
| GO:0005216 | MF | GO:0005216 | ion channel activity | 4/57 | 439/28404 | 0.011670928 | 0.060997544 | 0.035956447 | Grin3a/Glra3/Kcnj16/Kcnj12 | 4 |
| GO:0004674 | MF | GO:0004674 | protein serine/threonine kinase activity | 4/57 | 441/28404 | 0.011850951 | 0.060997544 | 0.035956447 | Camk2d/Prkg2/Cit/Cdk18 | 4 |
| GO:0005249 | MF | GO:0005249 | voltage-gated potassium channel activity | 2/57 | 95/28404 | 0.015678112 | 0.075924514 | 0.044755503 | Kcnj16/Kcnj12 | 2 |
| GO:0015267 | MF | GO:0015267 | channel activity | 4/57 | 483/28404 | 0.016052612 | 0.075924514 | 0.044755503 | Grin3a/Glra3/Kcnj16/Kcnj12 | 4 |
| GO:0022803 | MF | GO:0022803 | passive transmembrane transporter activity | 4/57 | 483/28404 | 0.016052612 | 0.075924514 | 0.044755503 | Grin3a/Glra3/Kcnj16/Kcnj12 | 4 |
| GO:0016757 | MF | GO:0016757 | glycosyltransferase activity | 3/57 | 270/28404 | 0.017041939 | 0.077496592 | 0.045682201 | Has1/Tmtc4/Pygm | 3 |
| GO:0051117 | MF | GO:0051117 | ATPase binding | 2/57 | 100/28404 | 0.017270669 | 0.077496592 | 0.045682201 | Tmtc4/Ank1 | 2 |
| GO:0004983 | MF | GO:0004983 | neuropeptide Y receptor activity | 1/57 | 10/28404 | 0.019890467 | 0.084898333 | 0.050045333 | Qrfpr | 1 |
| GO:0019992 | MF | GO:0019992 | diacylglycerol binding | 1/57 | 10/28404 | 0.019890467 | 0.084898333 | 0.050045333 | Unc13c | 1 |
| GO:0030594 | MF | GO:0030594 | neurotransmitter receptor activity | 2/57 | 111/28404 | 0.021004204 | 0.087517517 | 0.051589273 | Grin3a/Glra3 | 2 |
| GO:0008093 | MF | GO:0008093 | cytoskeletal anchor activity | 1/57 | 12/28404 | 0.02382166 | 0.089445925 | 0.052726019 | Ank1 | 1 |
| GO:0031432 | MF | GO:0031432 | titin binding | 1/57 | 12/28404 | 0.02382166 | 0.089445925 | 0.052726019 | Camk2d | 1 |
| GO:0039706 | MF | GO:0039706 | co-receptor binding | 1/57 | 12/28404 | 0.02382166 | 0.089445925 | 0.052726019 | Dkk2 | 1 |
| GO:0070097 | MF | GO:0070097 | delta-catenin binding | 1/57 | 12/28404 | 0.02382166 | 0.089445925 | 0.052726019 | Plekha7 | 1 |
| GO:0050839 | MF | GO:0050839 | cell adhesion molecule binding | 3/57 | 308/28404 | 0.02402262 | 0.089445925 | 0.052726019 | L1cam/Cdh20/Itga3 | 3 |
| GO:0005267 | MF | GO:0005267 | potassium channel activity | 2/57 | 121/28404 | 0.02466239 | 0.089914965 | 0.053002506 | Kcnj16/Kcnj12 | 2 |
| GO:0033691 | MF | GO:0033691 | sialic acid binding | 1/57 | 13/28404 | 0.025781443 | 0.092076583 | 0.054276722 | L1cam | 1 |
| GO:0005005 | MF | GO:0005005 | transmembrane-ephrin receptor activity | 1/57 | 14/28404 | 0.027737361 | 0.097080763 | 0.057226555 | Epha8 | 1 |
| GO:0005261 | MF | GO:0005261 | cation channel activity | 3/57 | 334/28404 | 0.029566721 | 0.098031105 | 0.057786757 | Grin3a/Kcnj16/Kcnj12 | 3 |
| GO:0030553 | MF | GO:0030553 | cGMP binding | 1/57 | 15/28404 | 0.02968942 | 0.098031105 | 0.057786757 | Prkg2 | 1 |
| GO:0042577 | MF | GO:0042577 | lipid phosphatase activity | 1/57 | 15/28404 | 0.02968942 | 0.098031105 | 0.057786757 | Sgpp2 | 1 |
| GO:0099106 | MF | GO:0099106 | ion channel regulator activity | 2/57 | 137/28404 | 0.031010547 | 0.098867591 | 0.058279843 | Gpld1/Camk2d | 2 |
| GO:0005003 | MF | GO:0005003 | ephrin receptor activity | 1/57 | 16/28404 | 0.031637629 | 0.098867591 | 0.058279843 | Epha8 | 1 |
| GO:0048019 | MF | GO:0048019 | receptor antagonist activity | 1/57 | 16/28404 | 0.031637629 | 0.098867591 | 0.058279843 | Dkk2 | 1 |
| GO:0005237 | MF | GO:0005237 | inhibitory extracellular ligand-gated ion channel activity | 1/57 | 17/28404 | 0.033581995 | 0.102120198 | 0.06019717 | Glra3 | 1 |
| GO:0008528 | MF | GO:0008528 | G protein-coupled peptide receptor activity | 2/57 | 146/28404 | 0.034835287 | 0.102120198 | 0.06019717 | Npsr1/Qrfpr | 2 |
| GO:0016247 | MF | GO:0016247 | channel regulator activity | 2/57 | 146/28404 | 0.034835287 | 0.102120198 | 0.06019717 | Gpld1/Camk2d | 2 |
| GO:0004435 | MF | GO:0004435 | phosphatidylinositol phospholipase C activity | 1/57 | 19/28404 | 0.037459227 | 0.102120198 | 0.06019717 | Plch1 | 1 |
| GO:0004629 | MF | GO:0004629 | phospholipase C activity | 1/57 | 19/28404 | 0.037459227 | 0.102120198 | 0.06019717 | Plch1 | 1 |
| GO:0004970 | MF | GO:0004970 | ionotropic glutamate receptor activity | 1/57 | 19/28404 | 0.037459227 | 0.102120198 | 0.06019717 | Grin3a | 1 |
| GO:0016208 | MF | GO:0016208 | AMP binding | 1/57 | 19/28404 | 0.037459227 | 0.102120198 | 0.06019717 | Pygm | 1 |
| GO:0043177 | MF | GO:0043177 | organic acid binding | 2/57 | 152/28404 | 0.037481913 | 0.102120198 | 0.06019717 | Grin3a/Glra3 | 2 |
| GO:0001653 | MF | GO:0001653 | peptide receptor activity | 2/57 | 153/28404 | 0.037930359 | 0.102120198 | 0.06019717 | Npsr1/Qrfpr | 2 |
| GO:0005178 | MF | GO:0005178 | integrin binding | 2/57 | 155/28404 | 0.038833458 | 0.102967501 | 0.060696632 | L1cam/Itga3 | 2 |
| GO:0015079 | MF | GO:0015079 | potassium ion transmembrane transporter activity | 2/57 | 157/28404 | 0.039744764 | 0.103302938 | 0.060894363 | Kcnj16/Kcnj12 | 2 |
| GO:0036122 | MF | GO:0036122 | BMP binding | 1/57 | 21/28404 | 0.041321175 | 0.103302938 | 0.060894363 | Grem2 | 1 |
| GO:0050998 | MF | GO:0050998 | nitric-oxide synthase binding | 1/57 | 21/28404 | 0.041321175 | 0.103302938 | 0.060894363 | Camk2d | 1 |
| GO:0099095 | MF | GO:0099095 | ligand-gated anion channel activity | 1/57 | 21/28404 | 0.041321175 | 0.103302938 | 0.060894363 | Glra3 | 1 |
| GO:0016408 | MF | GO:0016408 | C-acyltransferase activity | 1/57 | 22/28404 | 0.043246437 | 0.105112866 | 0.061961269 | Sptssb | 1 |
| GO:0042165 | MF | GO:0042165 | neurotransmitter binding | 1/57 | 22/28404 | 0.043246437 | 0.105112866 | 0.061961269 | Grin3a | 1 |
| GO:0000030 | MF | GO:0000030 | mannosyltransferase activity | 1/57 | 23/28404 | 0.045167899 | 0.10827921 | 0.063827745 | Tmtc4 | 1 |
| GO:0004683 | MF | GO:0004683 | calmodulin-dependent protein kinase activity | 1/57 | 24/28404 | 0.04708557 | 0.108504397 | 0.063960487 | Camk2d | 1 |
| GO:0017075 | MF | GO:0017075 | syntaxin-1 binding | 1/57 | 24/28404 | 0.04708557 | 0.108504397 | 0.063960487 | Unc13c | 1 |
| GO:0008327 | MF | GO:0008327 | methyl-CpG binding | 1/57 | 25/28404 | 0.048999458 | 0.108504397 | 0.063960487 | Cxxc4 | 1 |
| GO:0042610 | MF | GO:0042610 | CD8 receptor binding | 1/57 | 25/28404 | 0.048999458 | 0.108504397 | 0.063960487 | H2-Q2 | 1 |

**Supplementary Table 6:** Results of KEGG enrichment analysis of candidate genes.

|  | ID | Description | GeneRatio | BgRatio | pvalue | p.adjust | qvalue | geneID | Count |
| --- | --- | --- | --- | --- | --- | --- | --- | --- | --- |
| mmu04360 | mmu04360 | Axon guidance - Mus musculus (house mouse) | 4/29 | 181/9714 | 0.001923717 | 0.001923717 | 0.186296788 | L1cam/Camk2d/Shh/Epha8 | 4 |
| mmu04310 | mmu04310 | Wnt signaling pathway - Mus musculus (house mouse) | 3/29 | 175/9714 | 0.014891378 | 0.014891378 | 0.22963687 | Dkk2/Camk2d/Cxxc4 | 3 |
| mmu05031 | mmu05031 | Amphetamine addiction - Mus musculus (house mouse) | 2/29 | 69/9714 | 0.017841685 | 0.017841685 | 0.22963687 | Grin3a/Camk2d | 2 |
| mmu05214 | mmu05214 | Glioma - Mus musculus (house mouse) | 2/29 | 74/9714 | 0.020353953 | 0.020353953 | 0.22963687 | Camk2d/Shc3 | 2 |
| mmu04971 | mmu04971 | Gastric acid secretion - Mus musculus (house mouse) | 2/29 | 75/9714 | 0.020873286 | 0.020873286 | 0.22963687 | Kcnj16/Camk2d | 2 |
| mmu04510 | mmu04510 | Focal adhesion - Mus musculus (house mouse) | 3/29 | 202/9714 | 0.021755918 | 0.021755918 | 0.22963687 | Shc3/Itga3/Col9a2 | 3 |
| mmu05205 | mmu05205 | Proteoglycans in cancer - Mus musculus (house mouse) | 3/29 | 204/9714 | 0.02232304 | 0.02232304 | 0.22963687 | Camk2d/Ank1/Shh | 3 |
| mmu04012 | mmu04012 | ErbB signaling pathway - Mus musculus (house mouse) | 2/29 | 84/9714 | 0.02579255 | 0.02579255 | 0.22963687 | Camk2d/Shc3 | 2 |
| mmu05412 | mmu05412 | Arrhythmogenic right ventricular cardiomyopathy - Mus musculus (house mouse) | 2/29 | 86/9714 | 0.026944147 | 0.026944147 | 0.22963687 | Actn3/Itga3 | 2 |
| mmu04080 | mmu04080 | Neuroactive ligand-receptor interaction - Mus musculus (house mouse) | 4/29 | 390/9714 | 0.027469216 | 0.027469216 | 0.22963687 | Grin3a/Glra3/Npsr1/Qrfpr | 4 |
| mmu04512 | mmu04512 | ECM-receptor interaction - Mus musculus (house mouse) | 2/29 | 89/9714 | 0.028710186 | 0.028710186 | 0.22963687 | Itga3/Col9a2 | 2 |
| mmu04820 | mmu04820 | Cytoskeleton in muscle cells - Mus musculus (house mouse) | 3/29 | 232/9714 | 0.031116579 | 0.031116579 | 0.22963687 | Actn3/Itga3/Col9a2 | 3 |
| mmu04640 | mmu04640 | Hematopoietic cell lineage - Mus musculus (house mouse) | 2/29 | 94/9714 | 0.031754403 | 0.031754403 | 0.22963687 | Itga3/Kitl | 2 |
| mmu04713 | mmu04713 | Circadian entrainment - Mus musculus (house mouse) | 2/29 | 99/9714 | 0.03492108 | 0.03492108 | 0.22963687 | Camk2d/Prkg2 | 2 |
| mmu04916 | mmu04916 | Melanogenesis - Mus musculus (house mouse) | 2/29 | 100/9714 | 0.035568754 | 0.035568754 | 0.22963687 | Camk2d/Kitl | 2 |
| mmu04922 | mmu04922 | Glucagon signaling pathway - Mus musculus (house mouse) | 2/29 | 104/9714 | 0.038206182 | 0.038206182 | 0.231247944 | Camk2d/Pygm | 2 |
| mmu04725 | mmu04725 | Cholinergic synapse - Mus musculus (house mouse) | 2/29 | 113/9714 | 0.044405244 | 0.044405244 | 0.252958667 | Camk2d/Kcnj12 | 2 |

**Supplementary Table 7:** Results of GSEA enrichment analysis of 5 key genes (Ank1, Cbln4, L1cam, Gap43 and Shh)

| ID | Description | setSize | enrichmentScore | NES | pvalue | p.adjust | qvalue | rank | leading_edge | core_enrichment |  |  |
| --- | --- | --- | --- | --- | --- | --- | --- | --- | --- | --- | --- | --- |
| REACTOME_NONSENSE_MEDIATED_DECAY_NMD_INDEPENDENT_OF_THE_EXON_JUNCTION_COMPLEX_EJC | REACTOME_NONSENSE_MEDIATED_DECAY_NMD_INDEPENDENT_OF_THE_EXON_JUNCTION_COMPLEX_EJC | 91 | -0.56968241 | -2.669641147 | 1.00E-10 | 6.52E-08 | 5.12E-08 | 9898 | tags=65% | list=28% | signal=47% | Rps27/Gm2000/Rpl37a/Etf1/Rps29/Rps21/Rps15a/Rps12/Rpl35a/Rpl7/Eif4g1/Rps20/Rpl14/Upf1/Gm15013/Rpl18/Rps23/Rps3/Rpl10/Rps15/Rpl13a/Rpl19/Rps9/Rpl18a/Rps25/Rpl32/Rpl27a/Rps26/Rps16/Rps28/Rpl10-ps3/Rpl36a-ps1/Rps27l/Rpl13/Gspt2/Rps19/Rps14/Rps18/Rps4x/Rpl30/Rpl29/Rplp2/Rpl6/Rps7/Rpl12/Uba52/Rpl5/Rps17/Rps13/Gm11808/Rplp1/Rplp0/Rpl22/Ncbp1/Rpl3/Pabpc1/Rpl15/Rpl4/Rps2 |
| REACTOME_MAJOR_PATHWAY_OF_RRNA_PROCESSING_IN_THE_NUCLEOLUS_AND_CYTOSOL | REACTOME_MAJOR_PATHWAY_OF_RRNA_PROCESSING_IN_THE_NUCLEOLUS_AND_CYTOSOL | 174 | -0.437461915 | -2.278773163 | 1.00E-10 | 6.52E-08 | 5.12E-08 | 7497 | tags=44% | list=22% | signal=34% | Rps23/Rps3/Rpl10/Rps15/Heatr1/Rpl13a/Ddx49/Rpl19/Rps9/Tsr1/Nol11/Rpl18a/Rps25/Exosc6/Exosc10/Rpl32/Exosc8/Rpl27a/Rps26/Nob1/Krr1/Rps16/Rps28/Pno1/Rpl10-ps3/Rpl36a-ps1/Rps27l/Rpl13/Rps19/Rps14/Utp14a/C1d/Mphosph10/Rps18/Rps4x/Rpl30/Csnk1d/Rpl29/Utp25/Pelp1/Rplp2/Rpl6/Rps7/Emg1/Rpl12/Exosc1/Ddx21/Dis3/Senp3/Uba52/Rpl5/Rps17/Exosc4/Noc4l/Bysl/Imp3/Rps13/Pwp2/Gm11808/Dcaf13/Utp15/Rplp1/Utp4/Rplp0/Xrn2/Rcl1/Nip7/Rpl22/Rpl3/Nol6/Rpl15/Bop1/Rpl4/Nol9/Tbl3/Rps2 |
| REACTOME_FORMATION_OF_A_POOL_OF_FREE_40S_SUBUNITS | REACTOME_FORMATION_OF_A_POOL_OF_FREE_40S_SUBUNITS | 98 | -0.512614752 | -2.444783721 | 8.34E-10 | 3.63E-07 | 2.85E-07 | 9898 | tags=60% | list=28% | signal=43% | Rps27/Gm2000/Rpl37a/Rps29/Rps21/Rps15a/Rps12/Rpl35a/Rpl7/Rps20/Rpl14/Gm15013/Rpl18/Rps23/Rps3/Rpl10/Rps15/Rpl13a/Rpl19/Rps9/Rpl18a/Rps25/Rpl32/Eif3d/Rpl27a/Rps26/Rps16/Rps28/Rpl10-ps3/Rpl36a-ps1/Rps27l/Rpl13/Rps19/Rps14/Eif3b/Rps18/Rps4x/Eif3g/Eif3l/Rpl30/Rpl29/Rplp2/Rpl6/Rps7/Rpl12/Eif3m/Uba52/Rpl5/Rps17/Rps13/Gm11808/Rplp1/Rplp0/Rpl22/Rpl3/Rpl15/Rpl4/Rps2/Eif3e |
| REACTOME_NONSENSE_MEDIATED_DECAY_NMD | REACTOME_NONSENSE_MEDIATED_DECAY_NMD | 111 | -0.490151504 | -2.395520033 | 2.10E-09 | 6.85E-07 | 5.38E-07 | 9898 | tags=59% | list=28% | signal=42% | Rps27/Gm2000/Rpl37a/Etf1/Rps29/Rps21/Rps15a/Rps12/Rpl35a/Smg7/Rpl7/Eif4g1/Rps20/Rpl14/Upf1/Gm15013/Rpl18/Rps23/Rps3/Rpl10/Rps15/Rpl13a/Rpl19/Rps9/Rpl18a/Rps25/Rpl32/Rpl27a/Rps26/Rps16/Rps28/Rpl10-ps3/Rpl36a-ps1/Rps27l/Rpl13/Ppp2r1a/Gspt2/Rps19/Rps14/Rps18/Rps4x/Eif4a3/Rpl30/Rpl29/Magoh/Rplp2/Rpl6/Rps7/Rpl12/Magohb/Uba52/Rpl5/Rps17/Rps13/Gm11808/Rplp1/Rplp0/Rpl22/Ncbp1/Rpl3/Pabpc1/Rpl15/Rpl4/Upf3a/Rps2 |
| REACTOME_CHOLESTEROL_BIOSYNTHESIS | REACTOME_CHOLESTEROL_BIOSYNTHESIS | 27 | 0.767710268 | 2.516091769 | 2.65E-09 | 6.91E-07 | 5.43E-07 | 4737 | tags=78% | list=14% | signal=67% | Cyp51/Idi1/Dhcr24/Pmvk/Nsdhl/Sc5d/Ebp/Lss/Msmo1/Hmgcs1/Fdft1/Ggps1/Acat2/Sqle/Tm7sf2/Mvk/Fdps/Hmgcr/Dhcr7/Mvd/Arv1 |
| REACTOME_THE_CITRIC_ACID_TCA_CYCLE_AND_RESPIRATORY_ELECTRON_TRANSPORT | REACTOME_THE_CITRIC_ACID_TCA_CYCLE_AND_RESPIRATORY_ELECTRON_TRANSPORT | 154 | 0.476058142 | 2.169768152 | 3.40E-09 | 7.39E-07 | 5.81E-07 | 10379 | tags=55% | list=30% | signal=38% | Ppard/Ldhb/Coq10b/Pdp1/Cox7b/Slc25a27/Ndufaf2/Cox11/Uqcrh/Suclg2/Ogdh/Pdp2/Rxra/Atp5j/Cox6b1/Sco1/Ndufaf5/Ndufb5/Ndufs1/Surf1/Sdha/Cycs/Vdac1/Cox5a/Dlst/Idh3a/Tmem186/Cs/Tmem126b/Atp5o/Uqcrq/Me2/Pdk4/Coq10a/Ndufaf1/Cox4i1/Ndufaf7/Atp5j2/Dmac2l/Ndufc1/Ndufs7/Fh1/Ndufa4/Atp5b/Adhfe1/Uqcrc1/Ndufs6/Ndufs2/Timmdc1/L2hgdh/Cox7c/Ndufab1/Atp5g3/Ndufs5/Ndufb6/Acad9/Ndufb8/Atp5h/Ndufa6/Nubpl/Ndufs8/Cox14/Ndufa9/Etfa/Sdhc/Ucp3/Ndufb3/Ndufc2/Gm10053/Ndufa11/Cox19/Ndufa1/Cyc1/Pdha1/Pdhx/Nnt/Ndufb7/Atp5d/Ndufv1/Ndufa12/Ndufa10/Ndufb10/Cox5b/Taco1 |
| WP_CYTOPLASMIC_RIBOSOMAL_PROTEINS | WP_CYTOPLASMIC_RIBOSOMAL_PROTEINS | 77 | -0.533556295 | -2.433939721 | 5.11E-09 | 8.33E-07 | 6.55E-07 | 9898 | tags=61% | list=28% | signal=44% | Rps27/Rpl37a/Rps29/Rps21/Rps15a/Rps12/Rpl35a/Rpl7/Rps20/Rpl18/Rps23/Rps3/Rpl10/Rps6kb2/Rps15/Rpl13a/Rpl19/Rpl18a/Rps25/Rpl32/Rpl27a/Rps26/Rpl41/Rps16/Rps28/Rpl13/Rps19/Rps14/Rps18/Rps4x/Rpl30/Rpl29/Rpl6/Rps7/Rpl12/Rps5/Rpl7a/Rps17/Rpl10a/Rps13/Rplp1/Rplp0/Rpl22/Rpl3/Rpl15/Rpl4/Rps2 |
| REACTOME_RESPIRATORY_ELECTRON_TRANSPORT_ATP_SYNTHESIS_BY_CHEMIOSMOTIC_COUPLING_AND_HEAT_PRODUCTION_BY_UNCOUPLING_PROTEINS | REACTOME_RESPIRATORY_ELECTRON_TRANSPORT_ATP_SYNTHESIS_BY_CHEMIOSMOTIC_COUPLING_AND_HEAT_PRODUCTION_BY_UNCOUPLING_PROTEINS | 107 | 0.515365609 | 2.23495291 | 4.95E-09 | 8.33E-07 | 6.55E-07 | 10774 | tags=61% | list=31% | signal=42% | Coq10b/Cox7b/Slc25a27/Ndufaf2/Cox11/Uqcrh/Atp5j/Cox6b1/Sco1/Ndufaf5/Ndufb5/Ndufs1/Surf1/Cycs/Cox5a/Tmem186/Tmem126b/Atp5o/Uqcrq/Coq10a/Ndufaf1/Cox4i1/Ndufaf7/Atp5j2/Dmac2l/Ndufc1/Ndufs7/Ndufa4/Atp5b/Uqcrc1/Ndufs6/Ndufs2/Timmdc1/Cox7c/Ndufab1/Atp5g3/Ndufs5/Ndufb6/Acad9/Ndufb8/Atp5h/Ndufa6/Nubpl/Ndufs8/Cox14/Ndufa9/Etfa/Ucp3/Ndufb3/Ndufc2/Gm10053/Ndufa11/Cox19/Ndufa1/Cyc1/Ndufb7/Atp5d/Ndufv1/Ndufa12/Ndufa10/Ndufb10/Cox5b/Taco1/Ndufaf6/Atp5a1 |
| REACTOME_RHO_GTPASES_ACTIVATE_WASPS_AND_WAVES | REACTOME_RHO_GTPASES_ACTIVATE_WASPS_AND_WAVES | 32 | -0.721031892 | -2.718261151 | 7.06E-09 | 9.21E-07 | 7.23E-07 | 3236 | tags=56% | list=9% | signal=51% | Rac1/Brk1/Arpc3/Actg1/Baiap2/Actr2/Actb/Arpc1a/Nckap1/Mapk1/Cyfip1/Arpc4/Wasf1/Abi1/Grb2/Arpc2/Actr3/Arpc5 |
| REACTOME_EUKARYOTIC_TRANSLATION_INITIATION | REACTOME_EUKARYOTIC_TRANSLATION_INITIATION | 116 | -0.468597784 | -2.304341691 | 6.39E-09 | 9.21E-07 | 7.23E-07 | 9033 | tags=51% | list=26% | signal=38% | Rps15a/Rps12/Rpl35a/Rpl7/Eif4g1/Rps20/Rpl14/Gm15013/Rpl18/Rps23/Rps3/Rpl10/Rps15/Rpl13a/Rpl19/Rps9/Rpl18a/Rps25/Rpl32/Eif3d/Rpl27a/Rps26/Rps16/Rps28/Rpl10-ps3/Rpl36a-ps1/Rps27l/Rpl13/Rps19/Rps14/Eif3b/Eif5b/Rps18/Rps4x/Eif3g/Eif3l/Rpl30/Rpl29/Rplp2/Rpl6/Rps7/Rpl12/Eif3m/Uba52/Rpl5/Rps17/Rps13/Gm11808/Rplp1/Rplp0/Rpl22/Rpl3/Pabpc1/Rpl15/Rpl4/Eif4a1/Eif4b/Rps2/Eif3e |
| WP_CHOLESTEROL_BIOSYNTHESIS | WP_CHOLESTEROL_BIOSYNTHESIS | 15 | 0.865577637 | 2.454999928 | 8.72E-09 | 1.03E-06 | 8.12E-07 | 4689 | tags=100% | list=13% | signal=87% | Cyp51/Idi1/Pmvk/Nsdhl/Sc5d/Lss/Msmo1/Hmgcs1/Fdft1/Sqle/Mvk/Fdps/Hmgcr/Dhcr7/Mvd |
| REACTOME_EPH_EPHRIN_SIGNALING | REACTOME_EPH_EPHRIN_SIGNALING | 64 | -0.55937133 | -2.486671655 | 1.73E-08 | 1.88E-06 | 1.48E-06 | 1960 | tags=36% | list=6% | signal=34% | Kalrn/Efna3/Fyn/Ephb2/Arpc3/Actg1/Grin1/Src/Git1/Actr2/Rasa1/Epha4/Epha6/Actb/Arpc1a/Sdcbp/Arpc4/Arhgef28/Epha7/Arpc2/Nck2/Actr3/Arpc5 |
| REACTOME_ORGANELLE_BIOGENESIS_AND_MAINTENANCE | REACTOME_ORGANELLE_BIOGENESIS_AND_MAINTENANCE | 204 | 0.413645434 | 1.955195687 | 4.99E-08 | 5.00E-06 | 3.93E-06 | 8047 | tags=43% | list=23% | signal=33% | Dynll2/Clasp1/Ttbk2/Tubb3/Csnk1e/Prkar2b/Tuba1b/Ift22/Cep290/Ift27/Asap1/Gbf1/Tubg1/Bbs9/Iqcb1/Haus8/Traf3ip1/Alms1/Rpgrip1l/Ift172/Atat1/Hsp90aa1/Sirt5/Dync1h1/Ift43/Lztfl1/Atp5j/Sod2/Cep76/Actr1a/C2cd3/Tuba1a/Plk4/Cep43/Sclt1/Glud1/Dync2h1/Acss2/Exoc2/Tubb4a/Cycs/Haus1/Inpp5e/Cnga4/Trip11/Rab11a/Cep41/Tubb4b/Tubb5/Bbs4/Atp5o/Exoc7/Tmem67/Atp5j2/Ckap5/Dmac2l/Tuba1c/Exoc1/Ift80/Dynlrb1/Ccp110/Atp5b/Nedd1/Akap9/Rp2/Pafah1b1/Arl13b/Nphp3/Cep97/Mapre1/Kifap3/Atp5g3/Haus7/Rab8a/Arl6/Pde6d/Atp5h/Cep164/Cenpj/Sirt3/Cnga2/Kif3a/Exoc8/Pcm1/Dctn3/Tctn2/Tmem216/Cep131 |
| WP_ELECTRON_TRANSPORT_CHAIN | WP_ELECTRON_TRANSPORT_CHAIN | 79 | 0.540332459 | 2.237512788 | 7.69E-08 | 7.17E-06 | 5.63E-06 | 10340 | tags=59% | list=30% | signal=42% | Cox6a2/Cox7b/Slc25a27/Uqcrh/Atp5j/Sco1/Ndufb5/Ndufs1/Surf1/Sdha/Cox5a/Atp5o/Uqcrq/Cox4i1/Atp5j2/Dmac2l/Ndufc1/Atpif1/Ndufs7/Atp5b/Uqcrc1/Ndufs6/Ndufs2/Cox17/Slc25a4/Ndufab1/Atp5g3/Ndufs5/Ndufb6/Cox7a2/Atp5h/Ndufa6/Ndufs8/Ndufa9/Sdhc/Ucp3/Ndufb3/Ndufc2/Cox6c/Ndufa1/Ndufb7/Atp5d/Ndufv1/Ndufa12/Ndufa10/Ndufb10/Cox5b |
| REACTOME_DEVELOPMENTAL_BIOLOGY | REACTOME_DEVELOPMENTAL_BIOLOGY | 399 | -0.294311333 | -1.690956352 | 1.72E-07 | 1.50E-05 | 1.18E-05 | 2896 | tags=22% | list=8% | signal=20% | Pdlim7/Clta/Cdk4/Arhgef7/Krt2/Tgm1/Mapk7/Tcf4/Mef2d/Ap2b1/Krt15/Uba52/Ap2a2/Kalrn/Dok1/Efna3/Gm11808/Gpc1/Sema5a/Slit3/Gfra4/Trio/Krt73/Krt10/Myod1/Sptbn2/Klk5/Fyn/Adam11/Ephb2/Dab1/Rhob/Col6a5/Dok4/Arpc3/Actg1/Akt3/Dok6/Pik3r2/Grin1/Pik3cb/Unc5a/Src/Git1/Dlg4/Ncor2/Actr2/Plxna4/Nrp1/Foxo1/Sptb/Sema3e/Rasa1/Epha4/Pfn2/Ppl/Rara/Epha6/Actb/Krt9/Arpc1a/Ptpra/Smad3/Abl2/Sdcbp/Mapk1/Plxna1/Pfn1/Cdon/Crmp1/Cacng8/Arpc4/Klk8/Map2k1/Dscaml1/Pkp2/Lgi1/Cebpa/Arhgef28/Fgfr1/Dsp/Grb2/Epha7/Arpc2/Nck2/Actr3/Arpc5 |
| REACTOME_RESPIRATORY_ELECTRON_TRANSPORT | REACTOME_RESPIRATORY_ELECTRON_TRANSPORT | 86 | 0.516477755 | 2.166289096 | 2.36E-07 | 1.92E-05 | 1.51E-05 | 10379 | tags=62% | list=30% | signal=43% | Coq10b/Cox7b/Ndufaf2/Cox11/Uqcrh/Cox6b1/Sco1/Ndufaf5/Ndufb5/Ndufs1/Surf1/Cycs/Cox5a/Tmem186/Tmem126b/Uqcrq/Coq10a/Ndufaf1/Cox4i1/Ndufaf7/Ndufc1/Ndufs7/Ndufa4/Uqcrc1/Ndufs6/Ndufs2/Timmdc1/Cox7c/Ndufab1/Ndufs5/Ndufb6/Acad9/Ndufb8/Ndufa6/Nubpl/Ndufs8/Cox14/Ndufa9/Etfa/Ndufb3/Ndufc2/Gm10053/Ndufa11/Cox19/Ndufa1/Cyc1/Ndufb7/Ndufv1/Ndufa12/Ndufa10/Ndufb10/Cox5b/Taco1 |
| REACTOME_EPHB_MEDIATED_FORWARD_SIGNALING | REACTOME_EPHB_MEDIATED_FORWARD_SIGNALING | 36 | -0.632828053 | -2.429660526 | 9.27E-07 | 7.11E-05 | 5.58E-05 | 1960 | tags=44% | list=6% | signal=42% | Kalrn/Fyn/Ephb2/Arpc3/Actg1/Grin1/Src/Actr2/Rasa1/Actb/Arpc1a/Arpc4/Arhgef28/Arpc2/Actr3/Arpc5 |
| REACTOME_MRNA_SPLICING | REACTOME_MRNA_SPLICING | 201 | -0.340171959 | -1.796525949 | 2.80E-06 | 0.000202719 | 0.000159223 | 4184 | tags=27% | list=12% | signal=24% | Hnrnpl/Zfp830/Sugp1/Gm7879/Ppil4/Rbm42/Sf3b4/Cwc25/Hnrnpa1/Sf3b1/Snrpa/Dhx38/Prpf40a/Lsm4/Eif4a3/Magoh/Fus/Sf1/Polr2g/Snrnp200/Ddx41/Ddx5/Sf3b5/Sart1/U2af1l4/Lsm7/Hnrnpr/Gtf2f2/Cherp/Magohb/Prpf38a/U2af2/Cwc22/Polr2f/Rbmx/Lsm8/Xab2/Snrpg/Ctnnbl1/Ppil2/Htatsf1/Zmat2/Sde2/Rbm7/Sf3b3/Wbp11/Ncbp1/Eftud2/Ybx1/Cdc40/Polr2e/Gcfc2/Rbm22/Snrnp40/Srsf9 |
| REACTOME_METABOLISM_OF_STEROIDS | REACTOME_METABOLISM_OF_STEROIDS | 124 | 0.441544741 | 1.95497249 | 3.11E-06 | 0.000213771 | 0.000167904 | 4877 | tags=35% | list=14% | signal=30% | Cyp51/Stard4/Osbpl3/Acot8/Osbpl1a/Idi1/Dhcr24/Pmvk/Nsdhl/Sc5d/Ebp/Lss/Msmo1/Hmgcs1/Fdft1/Osbpl2/Ggps1/Acat2/Sqle/Srd5a1/Rxra/Ptgis/Akr1c14/Cyp46a1/Hsd3b4/Tm7sf2/Osbpl9/Mvk/Hsd17b2/Srd5a2/Ncoa2/Pomc/Fdps/Hmgcr/Hsd17b14/Slc27a2/Cyp39a1/Dhcr7/Hsd17b11/Mvd/Arv1/Hsd17b4/Akr1cl |
| WP_CHOLESTEROL_METABOLISM_WITH_BLOCH_AND_KANDUTSCHRUSSELL_PATHWAYS | WP_CHOLESTEROL_METABOLISM_WITH_BLOCH_AND_KANDUTSCHRUSSELL_PATHWAYS | 52 | 0.553605022 | 2.132206303 | 7.37E-06 | 0.000480753 | 0.000377602 | 6494 | tags=58% | list=19% | signal=47% | Cyp51/Idi1/Dhcr24/Pmvk/Nsdhl/Sc5d/Ebp/Lss/Msmo1/Hmgcs1/Nr1h2/Fdft1/Ggps1/Acat2/Sqle/Cyp46a1/Tm7sf2/Mvk/Fdps/Soat1/Hmgcr/Scd2/Scd1/Dhcr7/Mvd/Fads1/Soat2/Hsd17b7/Acsl3/Fasn |
| REACTOME_NEURONAL_SYSTEM | REACTOME_NEURONAL_SYSTEM | 330 | 0.325779349 | 1.612418285 | 1.19E-05 | 0.000741276 | 0.000582226 | 4305 | tags=28% | list=12% | signal=25% | Kcnj12/Kcna2/Gria4/Chrna4/Cplx1/Kcnk3/Grip2/Epb41l3/Hcn2/Ptprd/Prkacb/Glrb/Camk1/Kcnj9/Cacng2/Apba1/Lrrtm3/Kcna6/Adcy8/Slc38a1/Prkar2b/Camk2d/Hcn3/Gabra1/Stxbp1/Kcnh6/Epb41l2/Kcnc1/Camk2g/Kcnab3/Glra3/Gjd2/Gnal/Abat/Cacnb4/Epb41/Slc6a1/Kcnk9/Gabra3/Gls2/Cask/Aldh5a1/Slc38a2/Chrnb3/Adcy5/Pick1/Kcnj16/Slc32a1/Lrrtm2/Panx2/Kcnc2/Rps6ka3/Kcnj10/Prkar1b/Gad1/Grik1/Ptprf/Slc6a11/Kcna3/Kcnd1/Grin3a/Gnb1/Il1rapl1/Gabrg3/Myo6/Lin7a/Gnb4/Adcy6/Kcnh2/Chrna6/Dnajc5/Glra2/Epb41l5/Gng4/Kcnmb3/Cacna2d2/Gad2/Grik3/Dlg1/Slc1a6/Kcnh5/Gabbr2/Kcnq4/Gabrb2/Kcnj5/Kcnn1/Slc22a2/Adcy3/Gng3/Prkar1a/Kcnn3/Chat/Kcnc4/Gnai2 |
| REACTOME_FCGAMMA_RECEPTOR_FCGR_DEPENDENT_PHAGOCYTOSIS | REACTOME_FCGAMMA_RECEPTOR_FCGR_DEPENDENT_PHAGOCYTOSIS | 78 | -0.448237002 | -2.050219898 | 1.28E-05 | 0.000760772 | 0.000597539 | 1519 | tags=29% | list=4% | signal=28% | Fyn/Arpc3/Actg1/Pik3r2/Pik3cb/Src/Baiap2/Actr2/Nf2/Actb/Prkce/Arpc1a/Nckap1/Mapk1/Cyfip1/Arpc4/Wasf1/Abi1/Grb2/Elmo2/Arpc2/Actr3/Arpc5 |
| REACTOME_NERVOUS_SYSTEM_DEVELOPMENT | REACTOME_NERVOUS_SYSTEM_DEVELOPMENT | 262 | -0.297108475 | -1.611406567 | 3.53E-05 | 0.002000437 | 0.001571218 | 2258 | tags=24% | list=6% | signal=23% | Cxcr4/Rac1/Mapk14/Pdlim7/Clta/Arhgef7/Mapk7/Ap2b1/Uba52/Ap2a2/Kalrn/Dok1/Efna3/Gm11808/Gpc1/Sema5a/Slit3/Gfra4/Trio/Sptbn2/Fyn/Ephb2/Dab1/Rhob/Col6a5/Dok4/Arpc3/Actg1/Dok6/Pik3r2/Grin1/Pik3cb/Unc5a/Src/Git1/Actr2/Plxna4/Nrp1/Sptb/Sema3e/Rasa1/Epha4/Pfn2/Epha6/Actb/Arpc1a/Ptpra/Abl2/Sdcbp/Mapk1/Plxna1/Pfn1/Crmp1/Arpc4/Map2k1/Dscaml1/Arhgef28/Fgfr1/Grb2/Epha7/Arpc2/Nck2/Actr3/Arpc5 |
| REACTOME_ACTIVATION_OF_THE_MRNA_UPON_BINDING_OF_THE_CAP_BINDING_COMPLEX_AND_EIFS_AND_SUBSEQUENT_BINDING_TO_43S | REACTOME_ACTIVATION_OF_THE_MRNA_UPON_BINDING_OF_THE_CAP_BINDING_COMPLEX_AND_EIFS_AND_SUBSEQUENT_BINDING_TO_43S | 60 | -0.465847248 | -2.037149716 | 3.70E-05 | 0.002009964 | 0.001578701 | 9524 | tags=58% | list=27% | signal=42% | Rps29/Rps21/Rps15a/Rps12/Eif4g1/Rps20/Gm15013/Rps23/Rps3/Rps15/Rps9/Rps25/Eif3d/Rps26/Rps16/Rps28/Rps27l/Rps19/Rps14/Eif3b/Rps18/Rps4x/Eif3g/Eif3l/Rps7/Eif3m/Uba52/Rps17/Rps13/Gm11808/Pabpc1/Eif4a1/Eif4b/Rps2/Eif3e |
| REACTOME_PROCESSING_OF_CAPPED_INTRON_CONTAINING_PRE_MRNA | REACTOME_PROCESSING_OF_CAPPED_INTRON_CONTAINING_PRE_MRNA | 269 | -0.293979289 | -1.594073514 | 4.25E-05 | 0.002216613 | 0.001741011 | 4184 | tags=23% | list=12% | signal=21% | Hnrnpl/Nup85/Zfp830/Sugp1/Gm7879/Ppil4/Rbm42/Sf3b4/Cwc25/Hnrnpa1/Sf3b1/Snrpa/Dhx38/Prpf40a/Lsm4/Eif4a3/Magoh/Fus/Sf1/Polr2g/Snrnp200/Ddx41/Ddx5/Sf3b5/Sart1/U2af1l4/Lsm7/Hnrnpr/Gtf2f2/Cherp/Magohb/Prpf38a/U2af2/Sec13/Cwc22/Cpsf2/Polr2f/Rbmx/Lsm8/Seh1l/Xab2/Snrpg/Cstf2t/Ctnnbl1/Ppil2/Htatsf1/Cstf1/Zmat2/Sde2/Rbm7/Sf3b3/Wbp11/Ncbp1/Eftud2/Ybx1/Nup93/Cdc40/Polr2e/Gcfc2/Rbm22/Rae1/Snrnp40/Srsf9 |
| REACTOME_METABOLISM_OF_WATER_SOLUBLE_VITAMINS_AND_COFACTORS | REACTOME_METABOLISM_OF_WATER_SOLUBLE_VITAMINS_AND_COFACTORS | 110 | 0.416774083 | 1.815850239 | 6.28E-05 | 0.003150161 | 0.002474255 | 6494 | tags=36% | list=19% | signal=30% | Aldh1l1/Lmbrd1/Pdxk/Acaca/Pcx/Slc25a19/Cyb5a/Pank1/Slc19a2/Mmaa/Slc23a2/Slc25a32/Nmnat2/Slc5a6/Ppcdc/Nudt12/Ptgis/Tpk1/Mmab/Parp14/Mthfd2l/Pank4/Pank3/Mthfd2/Parp9/Hlcs/Dhfr/Pnpo/Parp4/Nadsyn1/Pank2/Slc19a3/Slc52a2/Mccc1/Rfk/Parp10/Gsto2/Slc19a1/Rnls/Fasn |
| WP_MRNA_PROCESSING | WP_MRNA_PROCESSING | 439 | -0.255875634 | -1.481750665 | 7.00E-05 | 0.003381815 | 0.002656204 | 4999 | tags=25% | list=14% | signal=22% | Srek1/Akap1/Ewsr1/Rps28/Srsf5/Ppm1g/Aimp1/Eif2d/Cirbp/Virma/Naa38/Hnrnpll/Hnrnpl/Zfp830/Rps14/Nop9/Sugp1/Trmt2a/Ppil4/Rbm42/Eif3b/Sf3b4/Park7/Hnrnpa1/Ptbp2/Brwd1/Sf3b1/Rps4x/Snrpa/Dhx38/Prpf40a/Eif3g/Rps4l/Pspc1/Lsm4/Eif4a3/Enox2/Mrpl11/Dazl/Rps7/Ddx19a/Fus/Rpl12/Polr2g/Ddx41/Celf5/Ddx5/Pabpc4/Ddx21/Sf3b5/Cpeb4/Celf1/Tarbp2/Lsm7/Hnrnpr/Dis3/Ilf3/Lsm11/Fdx2/U2af2/Myef2/Rbm3/Exosc4/Nono/Imp3/Rps13/Cdk9/Cpsf2/Pum1/Ptbp3/Rbmx/Sart3/Zfp346/Ppp1r8/Lsm8/Srp14/Sfswap/Cd2bp2/Snrpg/Cstf2t/Smn1/Hnrnpa0/Htatsf1/Cstf1/Zmat2/Elavl1/Hnrnpdl/Hnrnpab/Cpeb1/Xrn2/Celf2/Tnrc6c/Nip7/Rbm7/Sf3b3/Enox1/Rpl22/Eftud2/Pabpc1/Abcb4/Rbm11/Ybx1/Rbfox1/Raver1/Nifk/Cdc40/Rbm22/Rae1/Celf3/Snrnp40/Srsf9 |
| WP_OXIDATIVE_PHOSPHORYLATION | WP_OXIDATIVE_PHOSPHORYLATION | 45 | 0.541600612 | 2.014960146 | 7.72E-05 | 0.00359563 | 0.002824143 | 11054 | tags=67% | list=32% | signal=46% | Atp6ap2/Atp5j/Ndufb5/Ndufs1/Atp6ap1/Atp5o/Atp5j2/Dmac2l/Ndufc1/Ndufs7/Atp5b/Ndufs6/Ndufs2/Atp5g3/Ndufs5/Ndufb6/Ndufb8/Atp5h/Ndufa6/Ndufs8/Ndufa9/Ndufc2/Ndufa11/Ndufb7/Atp5d/Ndufv1/Ndufa10/Ndufb10/Atp5a1/Gzmb |
| REACTOME_GABA_SYNTHESIS_RELEASE_REUPTAKE_AND_DEGRADATION | REACTOME_GABA_SYNTHESIS_RELEASE_REUPTAKE_AND_DEGRADATION | 19 | 0.688641647 | 2.072068377 | 0.000137638 | 0.006188965 | 0.004861045 | 2925 | tags=53% | list=8% | signal=48% | Cplx1/Stxbp1/Abat/Slc6a1/Aldh5a1/Slc32a1/Gad1/Slc6a11/Dnajc5/Gad2 |
| BIOCARTA_DEATH_PATHWAY | BIOCARTA_DEATH_PATHWAY | 30 | 0.5874972 | 1.963121147 | 0.000173228 | 0.007529645 | 0.005914066 | 5608 | tags=47% | list=16% | signal=39% | Bcl2/Birc2/Map3k14/Xiap/Dffa/Cycs/Gas2/Casp7/Lmna/Casp3/Traf2/Rela/Casp6/Tnfsf10 |
| REACTOME_ANTIVIRAL_MECHANISM_BY_IFN_STIMULATED_GENES | REACTOME_ANTIVIRAL_MECHANISM_BY_IFN_STIMULATED_GENES | 30 | 0.586759749 | 1.960656956 | 0.000182393 | 0.007672292 | 0.006026106 | 7350 | tags=63% | list=21% | signal=50% | Ppm1b/Ifit1bl2/Eif4e2/Eif2ak2/Rnasel/Mx2/Eif4g3/Eif4g2/Trim25/Isg15/Usp18/Arih1/Eif4e/Plcg1/Irf3/Oasl1/Ube2e1/Ube2l6/Uba7 |
| REACTOME_DOWNREGULATION_OF_SMAD2_3_SMAD4_TRANSCRIPTIONAL_ACTIVITY | REACTOME_DOWNREGULATION_OF_SMAD2_3_SMAD4_TRANSCRIPTIONAL_ACTIVITY | 24 | -0.598641173 | -2.064371442 | 0.000205963 | 0.00806416 | 0.006333894 | 3911 | tags=50% | list=11% | signal=44% | Smad4/Atp1b4/Uba52/Gm11808/Ski/Ncor2/Hdac1/Smad3/Skil/Mapk1/Nedd4l/Parp1 |
| WP_AMINO_ACID_METABOLISM | WP_AMINO_ACID_METABOLISM | 94 | 0.42079543 | 1.785389775 | 0.000210262 | 0.00806416 | 0.006333894 | 9447 | tags=47% | list=27% | signal=34% | Acly/Pcx/Gclm/Ass1/Got1/Mdh1/Oat/Aldh18a1/Ogdh/Ppm1l/Asl/Th/Glud1/Sdha/Hibadh/Cth/Iars/Dlst/Aoc3/Cs/Pdk4/Hadh/Fah/Aldh7a1/Bcat1/Fh1/Pycr1/Hnmt/Mccc1/P4ha2/Pkm/Got2/Cad/Glul/Pck1/Eprs/G6pc2/Adh5/Hmgcl/Acadm/Idh1/Maoa/Pdha1/Pdhx |
| REACTOME_MITOTIC_PROMETAPHASE | REACTOME_MITOTIC_PROMETAPHASE | 193 | 0.353337425 | 1.656886359 | 0.000199212 | 0.00806416 | 0.006333894 | 6390 | tags=32% | list=18% | signal=26% | Dynll2/Clasp1/Tubb3/Ndel1/Ppp2r5b/Csnk1e/Rad21/Prkar2b/Zwint/Tubgcp5/Tuba1b/Dync1li2/Cep290/Cenpi/Tubg1/Clasp2/Ppp2cb/Haus8/Alms1/Hsp90aa1/Dync1h1/Cenpo/Cenps/Rangap1/Hdac8/Cep76/Nudc/Actr1a/Pmf1/Tuba1a/Plk4/Cep43/Mis12/Zw10/Cenpq/Tubb4a/Haus1/Cenpc1/Tubgcp6/Cenpt/Nup160/Cep41/Tubb4b/Cenpn/Tubb5/Mad2l1/Ckap5/Ppp2r1b/Tuba1c/Cenpl/Ccp110/Nedd1/Akap9/Pafah1b1/Ccnb1/Tubgcp4/Ndc80/Mapre1/Incenp/Cenpf/Haus7/Nup98 |
| REACTOME_TRANSLATION | REACTOME_TRANSLATION | 225 | -0.285506658 | -1.526771337 | 0.000244446 | 0.009107365 | 0.007153266 | 5497 | tags=31% | list=16% | signal=26% | Mrps24/Rps23/Rps3/Rpl10/Rps15/Rpl13a/Rpl19/Rps9/Rpl18a/Rps25/Rpl32/Eif3d/Mrpl2/Mrpl1/Rpl27a/Mrps18c/Rps26/Dap3/Rps16/Rps28/Mrpl3/Rpl10-ps3/Rpl36a-ps1/Rps27l/Mrpl4/Rpl13/Gspt2/Rps19/Rps14/Eif3b/Eif5b/Rps18/Rps4x/Eif3g/Eif3l/Rpl30/Rpl29/Mrpl11/Rplp2/Rpl6/Rps7/Rpl12/Eif3m/Mrpl38/Mrpl57/Uba52/Rpl5/Rps17/Rps13/Gm11808/Srp14/Rplp1/Mrps34/Rplp0/Mrps33/Mrpl33/Mrps9/Mrps26/N6amt1/Rpl22/Rpl3/Pabpc1/Rpl15/Rpl4/Mrpl53/Eif4a1/Eif4b/Eef1a1/Rps2/Eif3e |
| REACTOME_MAP2K_AND_MAPK_ACTIVATION | REACTOME_MAP2K_AND_MAPK_ACTIVATION | 39 | -0.513255031 | -1.989672581 | 0.000255637 | 0.009259722 | 0.007272933 | 1328 | tags=28% | list=4% | signal=27% | Actg1/Braf/Pebp1/Src/Actb/Mark3/Mapk1/Cnksr2/Map2k1/Arrb2/Ksr1 |
| REACTOME_PLATELET_ACTIVATION_SIGNALING_AND_AGGREGATION | REACTOME_PLATELET_ACTIVATION_SIGNALING_AND_AGGREGATION | 252 | -0.279792755 | -1.499028845 | 0.000313017 | 0.011031732 | 0.008664736 | 1912 | tags=19% | list=5% | signal=19% | Actn2/Rac1/Actn1/Adra2c/Mapk14/Gp6/Dgki/Daglb/Gng7/Cyb5r1/Abhd6/Ola1/Fyn/Rhob/Actg1/Dgkz/Gnaq/Pik3r2/Gna11/Ptpn1/Pik3cb/Ywhaz/Gnb2/Src/Lhfpl2/Bcar1/Calm2/Rasgrp1/Dagla/Trpc6/Calm3/Abhd12/Cd109/Dgkb/Prkce/Dgkd/Wdr1/Gng2/Chid1/Mapk1/Dgkh/Prkcg/Tgfb2/Arrb2/Lefty1/Grb2/Dgkg/Gng10/Tmsb4x |
| WP_ALANINE_AND_ASPARTATE_METABOLISM | WP_ALANINE_AND_ASPARTATE_METABOLISM | 15 | 0.720028247 | 2.042184571 | 0.000323379 | 0.011097021 | 0.008716017 | 3544 | tags=60% | list=10% | signal=54% | Pcx/Abat/Ass1/Got1/Gad1/Asl/Gpt/Gad2/Crat |
| BIOCARTA_BCELLSURVIVAL_PATHWAY | BIOCARTA_BCELLSURVIVAL_PATHWAY | 16 | 0.689052126 | 1.983096532 | 0.000336155 | 0.011239656 | 0.008828048 | 5252 | tags=62% | list=15% | signal=53% | Pik3ca/Pik3r1/Zbtb7a/Xiap/Dpf2/Itga1/Casp7/Fos/Casp3/Cct4 |
| REACTOME_RNA_POLYMERASE_I_TRANSCRIPTION | REACTOME_RNA_POLYMERASE_I_TRANSCRIPTION | 43 | -0.482789062 | -1.934834465 | 0.000346472 | 0.011295003 | 0.008871519 | 5832 | tags=44% | list=17% | signal=37% | Ercc6/Polr2h/Chd3/Gtf2h2/Polr1c/Mnat1/Mta1/Ehmt2/Ercc3/Ccnh/Polr2f/Chd4/Ubtf/Gtf2h5/Gatad2b/Hdac1/Rbbp7/Polr2e/Mta2 |
| REACTOME_RESOLUTION_OF_SISTER_CHROMATID_COHESION | REACTOME_RESOLUTION_OF_SISTER_CHROMATID_COHESION | 122 | 0.389689572 | 1.713721297 | 0.000399292 | 0.01269942 | 0.009974601 | 6390 | tags=34% | list=18% | signal=28% | Dynll2/Clasp1/Tubb3/Ndel1/Ppp2r5b/Rad21/Zwint/Tuba1b/Dync1li2/Cenpi/Clasp2/Ppp2cb/Dync1h1/Cenpo/Cenps/Rangap1/Hdac8/Nudc/Pmf1/Tuba1a/Mis12/Zw10/Cenpq/Tubb4a/Cenpc1/Cenpt/Nup160/Tubb4b/Cenpn/Mad2l1/Ckap5/Ppp2r1b/Tuba1c/Cenpl/Pafah1b1/Ccnb1/Ndc80/Mapre1/Incenp/Cenpf/Nup98 |
| REACTOME_EFFECTS_OF_PIP2_HYDROLYSIS | REACTOME_EFFECTS_OF_PIP2_HYDROLYSIS | 25 | -0.58471081 | -2.022678953 | 0.000453315 | 0.013747042 | 0.010797443 | 2670 | tags=48% | list=8% | signal=44% | Dgki/Daglb/Abhd6/Dgkz/Dagla/Trpc6/Abhd12/Dgkb/Prkce/Dgkd/Dgkh/Dgkg |
| REACTOME_SIGNALING_BY_NTRKS | REACTOME_SIGNALING_BY_NTRKS | 75 | -0.401933742 | -1.826784913 | 0.000447566 | 0.013747042 | 0.010797443 | 4255 | tags=39% | list=12% | signal=34% | Furin/Ngf/Ppp2r1a/Rac1/Vrk3/Mapk14/Ywhab/Sgk1/Clta/Mapk7/Ralgds/Ap2b1/Pcsk5/Srf/Ap2a2/Chd4/Dusp4/Fyn/Braf/Pik3r2/Bdnf/Pik3cb/Src/Mapk1/Ntrk3/Ntf3/Map2k1/Grb2/Dnal4 |
| REACTOME_CALCINEURIN_ACTIVATES_NFAT | REACTOME_CALCINEURIN_ACTIVATES_NFAT | 10 | -0.77704293 | -2.059866786 | 0.00047629 | 0.013760085 | 0.010807687 | 956 | tags=70% | list=3% | signal=68% | Calm1/Calm2/Calm3/Ppp3cb/Ppp3ca/Ppp3r1/Fkbp1a |
| WP_SPHINGOLIPID_METABOLISM_INTEGRATED_PATHWAY | WP_SPHINGOLIPID_METABOLISM_INTEGRATED_PATHWAY | 24 | 0.6084511 | 1.933312692 | 0.000497278 | 0.013760085 | 0.010807687 | 9188 | tags=75% | list=26% | signal=55% | Cerk/Sgpp2/Plpp1/Sphk1/Asah1/Degs2/Sgpp1/Smpd1/Plpp3/Ugcg/Cers5/Sphk2/Sptlc2/Ugt8a/Sgpl1/Cers4/Sgms1/Degs1 |
| REACTOME_REGULATION_OF_INSULIN_LIKE_GROWTH_FACTOR_IGF_TRANSPORT_AND_UPTAKE_BY_INSULIN_LIKE_GROWTH_FACTOR_BINDING_PROTEINS_IGFBPS | REACTOME_REGULATION_OF_INSULIN_LIKE_GROWTH_FACTOR_IGF_TRANSPORT_AND_UPTAKE_BY_INSULIN_LIKE_GROWTH_FACTOR_BINDING_PROTEINS_IGFBPS | 116 | 0.393401366 | 1.723601988 | 0.000504365 | 0.013760085 | 0.010807687 | 8782 | tags=41% | list=25% | signal=30% | Sparcl1/Fam20c/Aplp2/Megf11/Sdc2/Rcn1/App/Ktn1/Igf1/Hsp90b1/Hrc/Fam20a/Shisa5/Gas6/Vgf/Serpind1/Vwa1/Calu/Fstl1/Spp1/Apol9a/Pdia6/Igfbp5/Fuca2/Fgf23/Mgat4a/Apol7a/Ano8/Apol7c/Bpifb2/Bmp15/Tgoln1/Apol9b/Cdh2/Dmp1/Notum/Pnpla2/Dnajc3/Gpc3/Apol10b/Nucb1/Apol8/Cp/Igfbp6/Pcsk9/Chrdl1/Igfbp2 |
| REACTOME_GLYCEROPHOSPHOLIPID_BIOSYNTHESIS | REACTOME_GLYCEROPHOSPHOLIPID_BIOSYNTHESIS | 114 | 0.390301085 | 1.706880097 | 0.000473067 | 0.013760085 | 0.010807687 | 7236 | tags=44% | list=21% | signal=35% | Cds1/Gpat3/Agpat3/Lpgat1/Osbpl5/Pcyt1a/Abhd3/Pnpla8/Lpcat1/Etnk1/Ptdss1/Mboat7/Stard10/Cept1/Plaat1/Lpcat4/Etnk2/Miga2/Pitpnm3/Selenoi/Hadhb/Pitpnm1/Ddhd1/Pemt/Ptdss2/Lpin1/Miga1/Dgat1/Pnpla3/Agpat5/Plaat3/Pla2g6/Gpat4/Gpam/Chpt1/Chat/Pla1a/Pla2g4c/Etnppl/Cpne3/Hadha/Gpat2/Pcyt1b/Pcyt2/Cds2/Csnk2b/Pnpla2/Pla2g4a/Osbpl10/Pla2g15 |
| REACTOME_TRANSMISSION_ACROSS_CHEMICAL_SYNAPSES | REACTOME_TRANSMISSION_ACROSS_CHEMICAL_SYNAPSES | 207 | 0.334294197 | 1.585745317 | 0.000506506 | 0.013760085 | 0.010807687 | 5239 | tags=34% | list=15% | signal=29% | Kcnj12/Gria4/Chrna4/Cplx1/Grip2/Prkacb/Glrb/Camk1/Kcnj9/Cacng2/Apba1/Adcy8/Slc38a1/Prkar2b/Camk2d/Gabra1/Stxbp1/Camk2g/Glra3/Gnal/Abat/Cacnb4/Slc6a1/Gabra3/Gls2/Cask/Aldh5a1/Slc38a2/Chrnb3/Adcy5/Pick1/Kcnj16/Slc32a1/Rps6ka3/Kcnj10/Prkar1b/Gad1/Grik1/Slc6a11/Grin3a/Gnb1/Gabrg3/Myo6/Lin7a/Gnb4/Adcy6/Chrna6/Dnajc5/Glra2/Gng4/Cacna2d2/Gad2/Grik3/Dlg1/Slc1a6/Gabbr2/Gabrb2/Kcnj5/Slc22a2/Adcy3/Gng3/Prkar1a/Chat/Gnai2/Cacng4/Creb1/Grin2c/Gabrq/Grin2d/Slc5a7/Plcb3 |
| REACTOME_DARPP_32_EVENTS | REACTOME_DARPP_32_EVENTS | 17 | 0.670768062 | 1.952752732 | 0.000532304 | 0.014165814 | 0.011126362 | 4071 | tags=53% | list=12% | signal=47% | Pde4d/Prkacb/Prkar2b/Pde4b/Ppp2cb/Prkar1b/Cdk5/Prkar1a/Ppp2r1b |
| REACTOME_MITOCHONDRIAL_BIOGENESIS | REACTOME_MITOCHONDRIAL_BIOGENESIS | 26 | 0.589763407 | 1.921924566 | 0.000548115 | 0.014294834 | 0.011227699 | 8434 | tags=54% | list=24% | signal=41% | Sirt5/Atp5j/Sod2/Glud1/Acss2/Cycs/Atp5o/Atp5j2/Dmac2l/Atp5b/Atp5g3/Atp5h/Sirt3/Gm10053 |
| REACTOME_GLOBAL_GENOME_NUCLEOTIDE_EXCISION_REPAIR_GG_NER | REACTOME_GLOBAL_GENOME_NUCLEOTIDE_EXCISION_REPAIR_GG_NER | 81 | -0.383091669 | -1.774773178 | 0.000614067 | 0.015700855 | 0.01233204 | 5260 | tags=35% | list=15% | signal=29% | Pias3/Gtf2h2/Ino80c/Mnat1/Pole2/Pias1/Cetn2/Cops8/Pole4/Rfc3/Gps1/Ruvbl1/Ercc3/Ccnh/Nfrkb/Uba52/Xpa/Pole/Gm11808/Cul4a/Rfc5/Actg1/Mcrs1/Gtf2h5/Yy1/Ube2i/Parp1/Sumo2 |
| WP_ONECARBON_METABOLISM_AND_RELATED_PATHWAYS | WP_ONECARBON_METABOLISM_AND_RELATED_PATHWAYS | 52 | 0.480853963 | 1.852006051 | 0.000642414 | 0.016109767 | 0.012653216 | 9050 | tags=52% | list=26% | signal=38% | Pcyt1a/Etnk1/Gclm/Cept1/Etnk2/Ahcyl1/Gad1/Pemt/Sod2/Gad2/Cth/Dnmt3a/Chpt1/Bcat1/Dhfr/Gpx4/Pcyt1b/Pcyt2/Pld1/Sod1/Gpx3/Gpx2/Sod3/Shmt2/Bhmt2/Gpx1/Dmgdh |
| REACTOME_REGULATION_OF_TP53_ACTIVITY_THROUGH_ACETYLATION | REACTOME_REGULATION_OF_TP53_ACTIVITY_THROUGH_ACETYLATION | 29 | -0.520775964 | -1.898011289 | 0.000705949 | 0.017368998 | 0.013642263 | 1702 | tags=28% | list=5% | signal=26% | Chd4/Pip4k2c/Akt3/Gatad2b/Hdac1/Rbbp7/Brpf1/Mta2 |
| REACTOME_NUCLEOTIDE_EXCISION_REPAIR | REACTOME_NUCLEOTIDE_EXCISION_REPAIR | 108 | -0.347851474 | -1.685202459 | 0.000755179 | 0.018236173 | 0.014323374 | 6358 | tags=37% | list=18% | signal=30% | Xrcc1/Polr2a/Lig3/Cops6/Ercc6/Polr2h/Tcea1/Pias3/Gtf2h2/Ino80c/Mnat1/Pole2/Pias1/Cetn2/Zfp830/Cops8/Pole4/Rfc3/Gps1/Ruvbl1/Ercc3/Ccnh/Polr2g/Nfrkb/Uba52/Xpa/Pole/Gm11808/Polr2f/Cul4a/Xab2/Rfc5/Actg1/Mcrs1/Gtf2h5/Yy1/Ube2i/Polr2e/Parp1/Sumo2 |
| REACTOME_COMPLEX_I_BIOGENESIS | REACTOME_COMPLEX_I_BIOGENESIS | 50 | 0.482983767 | 1.837794961 | 0.000787229 | 0.018664491 | 0.014659791 | 10726 | tags=64% | list=31% | signal=44% | Ndufaf2/Ndufaf5/Ndufb5/Ndufs1/Tmem186/Tmem126b/Ndufaf1/Ndufaf7/Ndufc1/Ndufs7/Ndufs6/Ndufs2/Timmdc1/Ndufab1/Ndufs5/Ndufb6/Acad9/Ndufb8/Ndufa6/Nubpl/Ndufs8/Ndufa9/Ndufb3/Ndufc2/Ndufa11/Ndufa1/Ndufb7/Ndufv1/Ndufa12/Ndufa10/Ndufb10/Ndufaf6 |
| REACTOME_SIGNALING_BY_ERBB4 | REACTOME_SIGNALING_BY_ERBB4 | 34 | 0.539085566 | 1.862969065 | 0.000808949 | 0.018836959 | 0.014795255 | 4635 | tags=44% | list=13% | signal=38% | Nrg1/Pik3ca/Wwox/Pik3r1/Wwp1/Hbegf/Egfr/Btc/Erbb4/Kras/Ubc/Erbb3/Shc1/Psenen/Itch |
| WP_GLUTATHIONE_METABOLISM | WP_GLUTATHIONE_METABOLISM | 18 | 0.644601738 | 1.924431136 | 0.000881546 | 0.019819594 | 0.015567053 | 9815 | tags=67% | list=28% | signal=48% | Gstt1/Gclm/G6pdx/Ggt1/Gpx4/Gpx3/Gpx2/Gstt2/Ggt5/Idh1/Gpx1/Anpep |
| WP_TCA_CYCLE | WP_TCA_CYCLE | 31 | 0.556945708 | 1.876669522 | 0.000875603 | 0.019819594 | 0.015567053 | 4267 | tags=39% | list=12% | signal=34% | Pdp1/Pcx/Mdh1/Suclg2/Ogdh/Pdp2/Sdha/Dlst/Idh3a/Cs/Pdk4/Fh1 |
| WP_DRAVET_SYNDROME_SCN1AA1783V_POINT_MUTATION_MODEL | WP_DRAVET_SYNDROME_SCN1AA1783V_POINT_MUTATION_MODEL | 72 | 0.440910492 | 1.796185952 | 0.000901887 | 0.019933229 | 0.015656306 | 1946 | tags=31% | list=6% | signal=29% | Kcna2/Gria4/Pik3ca/Ldhb/Scn1a/Epb41l3/Kcnj9/Gabra1/Stxbp1/Ctps2/Chd2/Cacnb4/Slc12a5/Slc6a1/Gabra3/Scn4b/Mapk11/Kcnj10/Scn2b/Gad1/Grm3/Maob |
| REACTOME_PHOSPHOLIPID_METABOLISM | REACTOME_PHOSPHOLIPID_METABOLISM | 189 | 0.339487758 | 1.589355355 | 0.000992905 | 0.021579136 | 0.016949063 | 7343 | tags=41% | list=21% | signal=32% | Cds1/Gpat3/Agpat3/Lpgat1/Pik3r3/Pik3ca/Plekha6/Osbpl5/Mtmr7/Sacm1l/Pcyt1a/Pik3cd/Synj2/Abhd3/Pnpla8/Lpcat1/Etnk1/Pik3r1/Ptdss1/Mtmr4/Mboat7/Stard10/Cept1/Plaat1/Lpcat4/Etnk2/Miga2/Pitpnm3/Inpp4a/Selenoi/Hadhb/Plekha4/Pitpnm1/Ddhd1/Pemt/Ptdss2/Pip4p1/Lpin1/Miga1/Dgat1/Pnpla3/Agpat5/Plaat3/Vac14/Pnpla6/Inpp5e/Pla2g6/Mtmr14/Gpat4/Tnfaip8/Gpam/Chpt1/Chat/Pla1a/Ptpn13/Pla2g4c/Etnppl/Rab4a/Cpne3/Hadha/Mtmr2/Gpat2/Pcyt1b/Gde1/Pcyt2/Inpp5f/Pik3c2g/Inppl1/Cds2/Csnk2b/Pten/Pnpla2/Pla2g4a/Osbpl10/Pla2g15/Pik3c3/Mtmr6 |
| WP_SPHINGOLIPID_METABOLISM_OVERVIEW | WP_SPHINGOLIPID_METABOLISM_OVERVIEW | 23 | 0.602951013 | 1.904749515 | 0.001069356 | 0.022319307 | 0.017530421 | 9188 | tags=74% | list=26% | signal=54% | Cerk/Sgpp2/Plpp1/Sphk1/Asah1/Degs2/Sgpp1/Smpd1/Plpp3/Ugcg/Sphk2/Sptlc2/Ugt8a/Sgpl1/Cers4/Sgms1/Degs1 |
| REACTOME_RND2_GTPASE_CYCLE | REACTOME_RND2_GTPASE_CYCLE | 43 | 0.500482134 | 1.848979697 | 0.00104473 | 0.022319307 | 0.017530421 | 7066 | tags=47% | list=20% | signal=37% | Dst/Rnd2/Pik3r1/Ankrd26/Aldh3a2/Arhgap35/Frs3/Txnl1/Prag1/Tnfaip1/Ktn1/Nudc/Arhgap5/Scrib/Ptpn13/Fam83b/Fnbp1/Plxnd1/Wdr6/Golga3 |
| REACTOME_MAPK_FAMILY_SIGNALING_CASCADES | REACTOME_MAPK_FAMILY_SIGNALING_CASCADES | 290 | -0.25527665 | -1.404269237 | 0.00107831 | 0.022319307 | 0.017530421 | 2442 | tags=18% | list=7% | signal=17% | Psmd6/Lrrc7/Ralgds/Brap/Psmb5/Uba52/Kalrn/Gm11808/Gfra4/Rasal2/Sptbn2/Rgl1/Dusp4/Fyn/Fgf10/Rasgrf1/Actg1/Braf/Pebp1/Pik3r2/Grin1/Dusp5/Tyk2/Pik3cb/Psma4/Src/Dlg4/Fgf5/Calm2/Rasgrp1/Foxo1/Sptb/Calm3/Rasa1/Ppp1cc/Syngap1/Rasgef1a/Actb/Rapgef2/Ptpra/Camk2a/Mark3/Mapk1/Dlg3/Cnksr2/Map2k1/Fgf16/Arrb2/Fgfr1/Grb2/Abhd17c/Ksr1/Camk2b |
| REACTOME_AMPLIFICATION_OF_SIGNAL_FROM_THE_KINETOCHORES | REACTOME_AMPLIFICATION_OF_SIGNAL_FROM_THE_KINETOCHORES | 94 | 0.396477954 | 1.682213337 | 0.001095753 | 0.022325977 | 0.01753566 | 6390 | tags=34% | list=18% | signal=28% | Dynll2/Clasp1/Ndel1/Ppp2r5b/Zwint/Dync1li2/Cenpi/Clasp2/Ppp2cb/Dync1h1/Cenpo/Cenps/Rangap1/Nudc/Pmf1/Mis12/Zw10/Cenpq/Cenpc1/Cenpt/Nup160/Cenpn/Mad2l1/Ckap5/Ppp2r1b/Cenpl/Pafah1b1/Ndc80/Mapre1/Incenp/Cenpf/Nup98 |
| REACTOME_MITOTIC_SPINDLE_CHECKPOINT | REACTOME_MITOTIC_SPINDLE_CHECKPOINT | 111 | 0.386566644 | 1.682950407 | 0.001157066 | 0.023212532 | 0.018231993 | 6390 | tags=34% | list=18% | signal=28% | Dynll2/Clasp1/Ndel1/Ppp2r5b/Zwint/Dync1li2/Cenpi/Clasp2/Ppp2cb/Dync1h1/Cenpo/Cenps/Anapc15/Rangap1/Nudc/Pmf1/Anapc11/Mis12/Zw10/Anapc2/Cenpq/Cenpc1/Cenpt/Nup160/Cenpn/Anapc7/Mad2l1/Ckap5/Ppp2r1b/Cenpl/Pafah1b1/Anapc5/Ndc80/Mapre1/Incenp/Ube2e1/Cenpf/Nup98 |
| WP_NUCLEAR_RECEPTORS | WP_NUCLEAR_RECEPTORS | 38 | 0.505864761 | 1.804183903 | 0.001325064 | 0.025789308 | 0.02025589 | 8298 | tags=55% | list=24% | signal=42% | Ppard/Esrra/Rora/Nr1d2/Nr3c1/Nr1i3/Nr1h2/Rarb/Ppara/Rxra/Nr2f1/Pgr/Rxrg/Rarg/Esrrb/Nr0b1/Esr2/Pparg/Nr2f2/Thrb/Rorc |
| REACTOME_G_ALPHA_S_SIGNALLING_EVENTS | REACTOME_G_ALPHA_S_SIGNALLING_EVENTS | 128 | 0.36965418 | 1.645033257 | 0.001319859 | 0.025789308 | 0.02025589 | 6244 | tags=34% | list=18% | signal=28% | Hrh2/Adcyap1/Pth2r/Pde4d/Npsr1/Prkacb/Adrb1/Prkar2b/Arrb1/Pth1r/Calca/Crhr1/Prkar1b/Htr7/Gnb1/Gnb4/Gng4/Adm/Rxfp1/Gper1/Gpr15/Pomc/Gpr20/Grk5/Adrb3/Calcb/Gng3/Prkar1a/Shc1/Rln3/Grk2/Gnas/Ramp3/Adcyap1r1/Grk3/Tshb/Pde1b/Pthlh/Taar1/Pde7b/Pde4a/Mc3r/Ptgdr/Rxfp2 |
| REACTOME_CLASS_I_MHC_MEDIATED_ANTIGEN_PROCESSING_PRESENTATION | REACTOME_CLASS_I_MHC_MEDIATED_ANTIGEN_PROCESSING_PRESENTATION | 353 | 0.288488957 | 1.435569617 | 0.001464005 | 0.028074453 | 0.022050729 | 6388 | tags=30% | list=18% | signal=25% | Fbxo9/Uba6/Hecw2/Asb13/H2-Bl/Rnf217/Rnf130/Lrsam1/Ube2o/Glmn/H2-Q2/Kctd7/Lnx1/Wwp1/Psmc5/Cul7/Znrf1/Npepps/Stx4a/Herc6/Ube2j1/Canx/Asb2/Ube2f/Psmb10/Ubr4/Rnf14/Asb16/Klhl42/Rnf4/Uba3/Fbxo44/Fbxo22/Sec31a/Trim37/Fbxw17/Fbxl21/Herc4/Bcap31/Anapc11/Rnf6/Itgav/Anapc2/Ube2q2/Fbxo40/Lonrf1/Rnf111/Ubac1/Klhl41/Fbxo30/Spsb4/Ube2h/Rnf41/Ubc/Rnf114/Hectd3/Unkl/Fbxl14/Ltn1/Anapc7/Smurf1/Dcaf1/Ube2v2/Siah2/Uba5/Btbd1/Psme2/Rnf213/Klhl25/Trim50/Snap23/Fbxo2/Trim21/Psme1/Sec24b/Huwe1/Erap1/Sec24a/Hspa5/Itch/Rnf220/Mgrn1/Rnf144b/H2-T22/Stub1/Fbxl19/Ube3a/Psmd1/Anapc5/Fbxl4/H2-M10.6/Psmd12/Asb4/Rbx1/Calr/Lnpep/Sec24c/H2-Q1/Herc1/Ube2e1/Mib2/Klhl20/Atg7/Fbxo7/Skp2/Fbxl8 |
| REACTOME_ERBB2_ACTIVATES_PTK6_SIGNALING | REACTOME_ERBB2_ACTIVATES_PTK6_SIGNALING | 11 | 0.733023462 | 1.934117714 | 0.001612742 | 0.028098876 | 0.022069911 | 3470 | tags=55% | list=10% | signal=49% | Nrg1/Hbegf/Egfr/Btc/Erbb4/Erbb3 |
| REACTOME_CREATINE_METABOLISM | REACTOME_CREATINE_METABOLISM | 10 | 0.752651664 | 1.932152473 | 0.001579294 | 0.028098876 | 0.022069911 | 6072 | tags=70% | list=17% | signal=58% | Ckb/Slc6a8/Slc6a11/Ckmt1/Slc6a7/Gatm/Ckm |
| REACTOME_INTRA_GOLGI_TRAFFIC | REACTOME_INTRA_GOLGI_TRAFFIC | 35 | -0.487739756 | -1.86863734 | 0.001523882 | 0.028098876 | 0.022069911 | 3206 | tags=31% | list=9% | signal=29% | Ric1/Cog2/Nsf/Bet1l/Napa/Cog5/Cyth1/Cyth3/Stx6/Cyth4/Arf1 |
| REACTOME_CITRIC_ACID_CYCLE_TCA_CYCLE | REACTOME_CITRIC_ACID_CYCLE_TCA_CYCLE | 22 | 0.594684339 | 1.866931741 | 0.001616116 | 0.028098876 | 0.022069911 | 4267 | tags=36% | list=12% | signal=32% | Suclg2/Ogdh/Sdha/Dlst/Idh3a/Cs/Me2/Fh1 |
| REACTOME_DEADENYLATION_DEPENDENT_MRNA_DECAY | REACTOME_DEADENYLATION_DEPENDENT_MRNA_DECAY | 55 | -0.416297364 | -1.771180602 | 0.001572823 | 0.028098876 | 0.022069911 | 6497 | tags=45% | list=19% | signal=37% | Exosc6/Cnot11/Cnot7/Cnot1/Cnot3/Cnot2/Exosc8/Skiv2l/Dcp1b/Lsm4/Eif4a3/Exosc1/Lsm7/Dis3/Cnot6l/Edc3/Exosc4/Pan3/Parn/Edc4/Cnot8/Tnks1bp1/Pabpc1/Eif4a1/Eif4b |
| REACTOME_PROTEIN_PROTEIN_INTERACTIONS_AT_SYNAPSES | REACTOME_PROTEIN_PROTEIN_INTERACTIONS_AT_SYNAPSES | 66 | -0.395268991 | -1.766886713 | 0.001602324 | 0.028098876 | 0.022069911 | 2027 | tags=27% | list=6% | signal=26% | Nlgn1/Sh3glb2/Dlgap1/Slitrk2/Grm5/Grin1/Dlg4/Slitrk3/Slitrk5/Ppfia4/Dlg3/Ntrk3/Lrfn2/Grin2a/Homer3/Lrrtm4/Ppfia2/Gria1 |
| REACTOME_METABOLISM_OF_VITAMINS_AND_COFACTORS | REACTOME_METABOLISM_OF_VITAMINS_AND_COFACTORS | 170 | 0.340641697 | 1.567836663 | 0.001598604 | 0.028098876 | 0.022069911 | 6494 | tags=31% | list=19% | signal=25% | Aldh1l1/Lmbrd1/Pdxk/Acaca/Pcx/Rdh11/Lrp1/Slc25a19/Cyb5a/Pank1/Slc19a2/Sdc2/Mmaa/Slc23a2/Hsp90aa1/Slc25a32/Ttpa/Nmnat2/Slc5a6/Ppcdc/Nudt12/Ptgis/Akr1c14/Tpk1/Sdc3/Mmab/Parp14/Mthfd2l/Gchfr/Pank4/Pank3/Mthfd2/Gpc6/Parp9/Hlcs/Dhfr/Pnpo/Spr/Parp4/Nadsyn1/Akr1cl/Pank2/Slc19a3/Gpc5/Slc52a2/Mccc1/Rfk/Parp10/Gsto2/Slc19a1/Rnls/Ubiad1/Fasn |
| REACTOME_DEADENYLATION_OF_MRNA | REACTOME_DEADENYLATION_OF_MRNA | 25 | -0.545766705 | -1.887960355 | 0.001639716 | 0.028134077 | 0.02209756 | 6224 | tags=56% | list=18% | signal=46% | Cnot11/Cnot7/Cnot1/Cnot3/Cnot2/Eif4a3/Cnot6l/Pan3/Parn/Cnot8/Tnks1bp1/Pabpc1/Eif4a1/Eif4b |
| WP_GPCRS_ORPHAN | WP_GPCRS_ORPHAN | 18 | 0.627655646 | 1.8738393 | 0.001740986 | 0.029260658 | 0.022982419 | 4628 | tags=61% | list=13% | signal=53% | Gpr165/Tpra1/Wls/Gpr137/Gpr137b/Gpr107/Gpr89/Gpr180/Gpr137c/Adgrf2/Gpr4 |
| REACTOME_PEPTIDE_HORMONE_METABOLISM | REACTOME_PEPTIDE_HORMONE_METABOLISM | 60 | 0.449851649 | 1.769150512 | 0.001750254 | 0.029260658 | 0.022982419 | 6469 | tags=35% | list=19% | signal=29% | Dpp4/Mme/Atp6ap2/Ero1b/Pcsk1/Inhbb/Gnb1/Inhbe/Igf1/Pla2g7/Exoc2/Exoc7/Pomc/Exoc1/Enpep/Inha/Tshb/Cpa3/Bche/Ace/Ren1 |
| WP_KENNEDY_PATHWAY | WP_KENNEDY_PATHWAY | 14 | 0.670973751 | 1.877011751 | 0.001887071 | 0.031148619 | 0.024465294 | 7349 | tags=79% | list=21% | signal=62% | Pcyt1a/Etnk1/Ptdss1/Cept1/Etnk2/Pemt/Ptdss2/Chpt1/Pcyt1b/Pcyt2/Sgpl1 |
| REACTOME_TRANSCRIPTIONAL_ACTIVATION_OF_MITOCHONDRIAL_BIOGENESIS | REACTOME_TRANSCRIPTIONAL_ACTIVATION_OF_MITOCHONDRIAL_BIOGENESIS | 11 | 0.724977881 | 1.912889061 | 0.001995957 | 0.032132444 | 0.025238027 | 8434 | tags=64% | list=24% | signal=48% | Sirt5/Sod2/Glud1/Acss2/Cycs/Sirt3/Gm10053 |
| REACTOME_METABOLISM_OF_NUCLEOTIDES | REACTOME_METABOLISM_OF_NUCLEOTIDES | 96 | 0.383880102 | 1.630827134 | 0.001993137 | 0.032132444 | 0.025238027 | 6302 | tags=36% | list=18% | signal=30% | Impdh1/Entpd3/Adk/Cmpk1/Ctps2/Dctd/Entpd5/Tk1/Ampd3/Entpd2/Adss/Gmps/Nudt18/Dck/Gart/Adprm/Txn1/Nudt5/Nt5c3/Nudt1/Glrx/Adal/Dpys/Hprt/Tk2/Atic/Adssl1/Upb1/Ak1/Xdh/Nme1/Samhd1/Ak6/Nt5c/Cda |
| REACTOME_INTRAFLAGELLAR_TRANSPORT | REACTOME_INTRAFLAGELLAR_TRANSPORT | 48 | 0.471596179 | 1.780096279 | 0.00206772 | 0.032568478 | 0.025580505 | 4477 | tags=33% | list=13% | signal=29% | Dynll2/Tubb3/Tuba1b/Ift22/Ift27/Traf3ip1/Ift172/Ift43/Tuba1a/Dync2h1/Tubb4a/Trip11/Tubb4b/Tuba1c/Ift80/Dynlrb1 |
| REACTOME_SPHINGOLIPID_METABOLISM | REACTOME_SPHINGOLIPID_METABOLISM | 75 | 0.415665208 | 1.698499705 | 0.002072994 | 0.032568478 | 0.025580505 | 9943 | tags=56% | list=29% | signal=40% | Cerk/Sgpp2/Sptssb/Asah2/Aldh3a2/Plpp1/Arsa/Sphk1/Asah1/Cptp/Esyt1/Neu3/Degs2/Sgpp1/Smpd1/Arsk/B3galnt1/Glb1/Ormdl1/Plpp3/Hexa/Ugcg/Cers5/Gla/Ormdl2/Sphk2/Aldh3b3/Sptlc2/Neu4/Gba/Ugt8a/Sumf1/Sgpl1/Neu2/Acer3/Cers4/Sgms1/Degs1/Esyt3/Gltp/Acer2/Psap |
| BIOCARTA_STATHMIN_PATHWAY | BIOCARTA_STATHMIN_PATHWAY | 19 | 0.631993817 | 1.901619527 | 0.0021238 | 0.032969465 | 0.025895454 | 9418 | tags=68% | list=27% | signal=50% | Stmn1/Prkacb/Prkar2b/Prkar1b/Rb1cc1/Uhmk1/Prkar1a/Hspa5/Ccnb1/Prkar2a/Camk4/Cd3g/Mapk13 |
| REACTOME_KINESINS | REACTOME_KINESINS | 57 | 0.449119311 | 1.754460103 | 0.002206197 | 0.033845655 | 0.026583648 | 9007 | tags=44% | list=26% | signal=33% | Tubb3/Kif21a/Tuba1b/Racgap1/Klc4/Kif1a/Kif16b/Kif5b/Kif22/Tuba1a/Tubb4a/Kif21b/Tubb4b/Kif23/Tuba1c/Klc2/Kif4/Kifap3/Kifc5b/Kif5a/Kif3a/Kif1b/Kif20b/Klc1/Kif26a |
| BIOCARTA_MITOCHONDRIA_PATHWAY | BIOCARTA_MITOCHONDRIA_PATHWAY | 19 | 0.628833555 | 1.892110547 | 0.002368262 | 0.035211175 | 0.027656178 | 5524 | tags=53% | list=16% | signal=44% | Bcl2/Birc2/Xiap/Dffa/Cycs/Bak1/Casp7/Diablo/Casp3/Casp6 |
| REACTOME_PI3K_EVENTS_IN_ERBB2_SIGNALING | REACTOME_PI3K_EVENTS_IN_ERBB2_SIGNALING | 14 | 0.665384452 | 1.861375997 | 0.002331079 | 0.035211175 | 0.027656178 | 3470 | tags=57% | list=10% | signal=51% | Nrg1/Pik3ca/Pik3r1/Hbegf/Egfr/Btc/Erbb4/Erbb3 |
| REACTOME_SYNTHESIS_OF_BILE_ACIDS_AND_BILE_SALTS | REACTOME_SYNTHESIS_OF_BILE_ACIDS_AND_BILE_SALTS | 35 | 0.513497954 | 1.793262262 | 0.002376214 | 0.035211175 | 0.027656178 | 5845 | tags=43% | list=17% | signal=36% | Osbpl3/Acot8/Osbpl1a/Osbpl2/Rxra/Ptgis/Akr1c14/Cyp46a1/Osbpl9/Ncoa2/Slc27a2/Cyp39a1/Hsd17b4/Akr1cl/Amacr |
| REACTOME_SIGNALING_BY_HEDGEHOG | REACTOME_SIGNALING_BY_HEDGEHOG | 140 | 0.339818048 | 1.532721453 | 0.002567065 | 0.037611833 | 0.029541745 | 5694 | tags=29% | list=16% | signal=25% | Shh/Tubb3/Ptch1/Prkacb/Adcy8/Prkar2b/Tuba1b/Arrb1/Psmc5/Gli1/Rpgrip1l/Ift172/Adcy5/Gsk3b/Prkar1b/Psmb10/Dzip1/Adcy6/Tuba1a/Os9/Dync2h1/Tubb4a/Ubc/Tubb4b/Smurf1/Numb/Psme2/Adcy3/Prkar1a/Grk2/Tuba1c/Psme1/Hhip/Itch/Scube2/Psmd1/Psmd12/Rbx1/Syvn1/Gpc5/Cdc73 |
| WP_GPCRS_ODORANT | WP_GPCRS_ODORANT | 98 | 0.384584223 | 1.644207243 | 0.002664238 | 0.03860185 | 0.030319341 | 4637 | tags=29% | list=13% | signal=25% | Gpr3/Gpr165/Lgr6/Lgr5/Tpra1/Adgrg6/Gpr139/Tas1r1/Mrgpre/Wls/Gpr137/Gpr153/Gpr137b/Gpr88/Gpr107/Gpr89/Gpr180/Oprl1/Mrgprf/Gpr162/Gpr137c/Adgra3/Gpr158/Gpr20/Adgrf2/Gpr157/Gpr4/Gpr37l1 |
| REACTOME_NUCLEAR_RECEPTOR_TRANSCRIPTION_PATHWAY | REACTOME_NUCLEAR_RECEPTOR_TRANSCRIPTION_PATHWAY | 48 | 0.462598383 | 1.746133022 | 0.002799149 | 0.040110877 | 0.031504588 | 4224 | tags=38% | list=12% | signal=33% | Ppard/Esrrg/Esrra/Rora/Nr1d2/Rorb/Nr3c1/Nr1i3/Nr1h2/Rarb/Ppara/Rxra/Nr2f1/Pgr/Nr6a1/Rxrg/Rarg/Esrrb |
| BIOCARTA_AT1R_PATHWAY | BIOCARTA_AT1R_PATHWAY | 25 | -0.528536252 | -1.828355374 | 0.003055074 | 0.042381032 | 0.033287653 | 1265 | tags=36% | list=4% | signal=35% | Gnaq/Calm3/Jun/Prkca/Mapk1/Elk1/Map2k1/Grb2/Ptk2b |
| REACTOME_RECRUITMENT_OF_NUMA_TO_MITOTIC_CENTROSOMES | REACTOME_RECRUITMENT_OF_NUMA_TO_MITOTIC_CENTROSOMES | 88 | 0.392666117 | 1.651924934 | 0.002993564 | 0.042381032 | 0.033287653 | 6274 | tags=36% | list=18% | signal=30% | Clasp1/Tubb3/Csnk1e/Prkar2b/Tubgcp5/Tuba1b/Cep290/Tubg1/Haus8/Alms1/Hsp90aa1/Dync1h1/Cep76/Actr1a/Tuba1a/Plk4/Cep43/Tubb4a/Haus1/Tubgcp6/Cep41/Tubb4b/Tubb5/Ckap5/Tuba1c/Ccp110/Nedd1/Akap9/Pafah1b1/Tubgcp4/Mapre1/Haus7 |
| WP_PURINE_METABOLISM | WP_PURINE_METABOLISM | 169 | 0.323214841 | 1.48546859 | 0.003028822 | 0.042381032 | 0.033287653 | 6232 | tags=31% | list=18% | signal=25% | Pde4d/Impdh1/Gucy1a1/Adcy8/Entpd3/Adk/Enpp3/Pde4b/Polr1b/Polr2c/Prim1/Adcy5/Entpd5/Ampd3/Entpd2/Adss/Nme6/Prim2/Pgm2/Polr3k/Gmps/Dck/Adcy6/Fhit/Gart/Adprm/Nudt5/Nt5c3/Gucy1a2/Pde9a/Cant1/Hprt/Pold1/Atic/Adssl1/Hddc3/Adcy3/Nudt2/Ak1/Prune1/Xdh/Polr3d/Gucy2c/Pde1c/Nme1/Pde1b/Ak6/Pde7b/Pde4a/Polr3h/Nt5c/Pold2 |
| REACTOME_AURKA_ACTIVATION_BY_TPX2 | REACTOME_AURKA_ACTIVATION_BY_TPX2 | 70 | 0.42201547 | 1.714441487 | 0.003127072 | 0.042923178 | 0.033713474 | 8047 | tags=47% | list=23% | signal=36% | Clasp1/Csnk1e/Prkar2b/Cep290/Tubg1/Haus8/Alms1/Hsp90aa1/Dync1h1/Cep76/Hmmr/Actr1a/Tuba1a/Plk4/Cep43/Tubb4a/Haus1/Cep41/Tubb4b/Tubb5/Ckap5/Ccp110/Nedd1/Akap9/Pafah1b1/Mapre1/Haus7/Tpx2/Cep164/Cenpj/Pcm1/Dctn3/Cep131 |
| REACTOME_UNBLOCKING_OF_NMDA_RECEPTORS_GLUTAMATE_BINDING_AND_ACTIVATION | REACTOME_UNBLOCKING_OF_NMDA_RECEPTORS_GLUTAMATE_BINDING_AND_ACTIVATION | 22 | -0.550667834 | -1.845248141 | 0.003219962 | 0.043737814 | 0.03435332 | 3336 | tags=55% | list=10% | signal=49% | Actn2/Lrrc7/Grin1/Dlg4/Calm2/Calm3/Gria2/Camk2a/Dlg3/Grin2a/Gria1/Camk2b |
| WP_SPINAL_CORD_INJURY | WP_SPINAL_CORD_INJURY | 98 | -0.338957366 | -1.616569651 | 0.003408945 | 0.045827462 | 0.035994608 | 5258 | tags=29% | list=15% | signal=24% | Btg2/Mmp12/Trp53/Pla2g2a/Vim/Nos1/Il6/Ccl2/Gfap/Cxcl1/Rtn4r/Slit3/Myc/Rhob/Grin1/Bdnf/Ccnd1/Rb1/Chst11/Epha4/Ptpra/Prkca/Il1r1/Mapk1/Ppp3ca/Klk8/Slit1/Fkbp1a |
| WP_DYSREGULATED_MIRNA_TARGETING_IN_INSULINPI3KAKT_SIGNALING | WP_DYSREGULATED_MIRNA_TARGETING_IN_INSULINPI3KAKT_SIGNALING | 26 | 0.543013637 | 1.769576133 | 0.003494469 | 0.046028152 | 0.036152237 | 10020 | tags=65% | list=29% | signal=47% | Bcl2/Pik3r3/Acaca/Pik3r1/Eif4e2/Crkl/Exoc7/Cdkn1b/Fasn/Prkar2a/Sos1/Socs1/Col3a1/Bad/Mtor/Col1a1/Col1a2 |
| REACTOME_ANCHORING_OF_THE_BASAL_BODY_TO_THE_PLASMA_MEMBRANE | REACTOME_ANCHORING_OF_THE_BASAL_BODY_TO_THE_PLASMA_MEMBRANE | 95 | 0.384380182 | 1.633745768 | 0.003488452 | 0.046028152 | 0.036152237 | 8047 | tags=44% | list=23% | signal=34% | Clasp1/Ttbk2/Csnk1e/Prkar2b/Cep290/Tubg1/Iqcb1/Haus8/Alms1/Rpgrip1l/Hsp90aa1/Dync1h1/Cep76/Actr1a/C2cd3/Tuba1a/Plk4/Cep43/Sclt1/Tubb4a/Haus1/Rab11a/Cep41/Tubb4b/Tubb5/Tmem67/Ckap5/Ccp110/Nedd1/Akap9/Pafah1b1/Cep97/Mapre1/Haus7/Rab8a/Cep164/Cenpj/Pcm1/Dctn3/Tctn2/Tmem216/Cep131 |
| REACTOME_TRANSCRIPTIONAL_ACTIVITY_OF_SMAD2_SMAD3_SMAD4_HETEROTRIMER | REACTOME_TRANSCRIPTIONAL_ACTIVITY_OF_SMAD2_SMAD3_SMAD4_HETEROTRIMER | 40 | -0.450597704 | -1.762671543 | 0.003659733 | 0.047722921 | 0.037483373 | 4255 | tags=38% | list=12% | signal=33% | Furin/Smad4/Atp1b4/Uba52/Cdk9/Gm11808/Ski/Ncor2/Tfdp1/Hdac1/Smad3/Skil/Mapk1/Nedd4l/Parp1 |
| BIOCARTA_BCR_PATHWAY | BIOCARTA_BCR_PATHWAY | 31 | -0.480910545 | -1.790925724 | 0.003767974 | 0.048195492 | 0.037854548 | 871 | tags=39% | list=3% | signal=38% | Hras/Vav1/Calm1/Mapk14/Calm3/Ppp3cb/Jun/Prkca/Elk1/Ppp3ca/Map2k1/Grb2 |
| REACTOME_PYRUVATE_METABOLISM_AND_CITRIC_ACID_TCA_CYCLE | REACTOME_PYRUVATE_METABOLISM_AND_CITRIC_ACID_TCA_CYCLE | 47 | 0.467325161 | 1.758409439 | 0.003840064 | 0.048195492 | 0.037854548 | 4669 | tags=34% | list=13% | signal=30% | Ppard/Ldhb/Pdp1/Suclg2/Ogdh/Pdp2/Rxra/Sdha/Vdac1/Dlst/Idh3a/Cs/Me2/Pdk4/Fh1/Adhfe1 |
| REACTOME_CYTOPROTECTION_BY_HMOX1 | REACTOME_CYTOPROTECTION_BY_HMOX1 | 49 | 0.454680496 | 1.727759165 | 0.003843812 | 0.048195492 | 0.037854548 | 4313 | tags=35% | list=12% | signal=30% | Tbl1x/Cox7b/Blvra/Cox11/Ppara/Rxra/Chd9/H13/Cox6b1/Sco1/Surf1/Cycs/Cox5a/Ncoa2/Cox4i1/Helz2/Ndufa4 |
| REACTOME_POTASSIUM_CHANNELS | REACTOME_POTASSIUM_CHANNELS | 97 | 0.373050449 | 1.595487554 | 0.003803194 | 0.048195492 | 0.037854548 | 4262 | tags=30% | list=12% | signal=26% | Kcnj12/Kcna2/Kcnk3/Hcn2/Kcnj9/Kcna6/Hcn3/Kcnh6/Kcnc1/Kcnab3/Kcnk9/Kcnj16/Kcnc2/Kcnj10/Kcna3/Kcnd1/Gnb1/Gnb4/Kcnh2/Gng4/Kcnmb3/Kcnh5/Gabbr2/Kcnq4/Kcnj5/Kcnn1/Gng3/Kcnn3/Kcnc4 |
| REACTOME_GOLGI_TO_ER_RETROGRADE_TRANSPORT | REACTOME_GOLGI_TO_ER_RETROGRADE_TRANSPORT | 128 | 0.353731566 | 1.574174515 | 0.003888955 | 0.048297117 | 0.037934367 | 8517 | tags=41% | list=24% | signal=31% | Dynll2/Agpat3/Tubb3/Kif21a/Rab3gap2/Tuba1b/Racgap1/Rint1/Klc4/Dync1li2/Copa/Gbf1/Bicd2/Rab1a/Kif1a/Dync1h1/Kif16b/Kif5b/Kif22/Actr1a/Tuba1a/Zw10/Tubb4a/Kif21b/Pla2g6/Tubb4b/Arfgap3/Kif23/Rab3gap1/Tmed3/Bicd1/Nbas/Tuba1c/Copg1/Kdelr2/Pafah1b1/Klc2/Galnt1/Kif4/Kifap3/Pafah1b3/Pafah1b2/Tmed10/Kifc5b/Pla2g4a/Rab6b/Kif5a/Kif3a/Dctn3/Kif1b/Kif20b/Klc1 |
| REACTOME_SIGNALING_BY_VEGF | REACTOME_SIGNALING_BY_VEGF | 100 | -0.319403865 | -1.523954122 | 0.004190785 | 0.051554563 | 0.040492888 | 1536 | tags=21% | list=4% | signal=20% | Nrp2/Fyn/Actg1/Akt3/Pik3r2/Pik3cb/Src/Bcar1/Baiap2/Calm2/Nrp1/Calm3/Rasa1/Actb/Nckap1/Cyfip1/Wasf1/Abi1/Elmo2/Nck2/Ptk2b |
| REACTOME_PEROXISOMAL_LIPID_METABOLISM | REACTOME_PEROXISOMAL_LIPID_METABOLISM | 28 | 0.517545028 | 1.707574696 | 0.004316808 | 0.052378774 | 0.041140254 | 7105 | tags=46% | list=20% | signal=37% | Acot8/Aldh3a2/Acox3/Decr2/Phyh/Crat/Hacl1/Slc27a2/Hsd17b4/Acox1/Acbd5/Amacr/Abcd1 |
| REACTOME_FATTY_ACID_METABOLISM | REACTOME_FATTY_ACID_METABOLISM | 162 | 0.333551768 | 1.521736834 | 0.004338119 | 0.052378774 | 0.041140254 | 8820 | tags=41% | list=25% | signal=31% | Ppard/Tecr/Acot8/Acsl6/Acly/Acaca/Prkaa2/Cyp2u1/Acsbg1/Mmaa/Aldh3a2/Mid1ip1/Cyp2j6/Hadhb/Acox3/Decr1/Rxra/Acot11/Pon2/Ptgis/Elovl6/Decr2/Phyh/Crat/Cyp4f14/Hacl1/Hadh/Acsf3/Acot7/Alox15/Slc27a2/Scd1/Ppt1/Ggt1/Hsd17b4/Fads1/Acox1/Hacd3/Acbd5/Alox8/Hadha/Gpx4/Amacr/Ptgds/Ndufab1/Hacd1/Acsl3/Cbr1/Fasn/Mapkapk2/Acad10/Pla2g4a/Abcd1/Tecrl/Cyp4a12b/Them5/Gpx2/Lta4h/Eci1/Acadl/Fads2/Acadm/Elovl3/Cyp4a10/Ggt5/Gpx1 |
| REACTOME_TRANSPORT_OF_CONNEXONS_TO_THE_PLASMA_MEMBRANE | REACTOME_TRANSPORT_OF_CONNEXONS_TO_THE_PLASMA_MEMBRANE | 17 | 0.607734326 | 1.769247723 | 0.004448016 | 0.052729207 | 0.041415497 | 4294 | tags=47% | list=12% | signal=41% | Tubb3/Tuba1b/Tuba1a/Tubb4a/Tubb4b/Gja1/Gjb2/Tuba1c |
| REACTOME_CELL_CYCLE_CHECKPOINTS | REACTOME_CELL_CYCLE_CHECKPOINTS | 280 | 0.291164853 | 1.414193915 | 0.0044266 | 0.052729207 | 0.041415497 | 6393 | tags=28% | list=18% | signal=23% | Dynll2/Clasp1/Zfp385a/Ndel1/Ppp2r5b/Zwint/Dync1li2/Psmc5/Cenpi/Clasp2/Rad9a/Ppp2cb/Cdc25a/Nbn/Dync1h1/Nsd2/Cenpo/Psmb10/Wee1/Cenps/Anapc15/Mdc1/Rangap1/Kat5/H2bc7/Nudc/Pkmyt1/Pmf1/Abraxas1/Anapc11/Mis12/Zw10/Rnf168/Anapc2/Cenpq/Brip1/Dna2/Cenpc1/Ubc/Cenpt/Orc5/Nup160/H2bc22/Cenpn/Anapc7/Orc2/Mad2l1/Ube2v2/Psme2/Rbbp8/Ckap5/Babam1/Ppp2r1b/Hus1/Psme1/Cenpl/H2bc21/Mcm10/Ccne1/Pafah1b1/Psmd1/Rfc4/Ccnb1/Anapc5/H4c6/Psmd12/Mcm8/Ndc80/Mcm4/Mapre1/Incenp/Ube2e1/Cenpf/Wrn/Mdm4/Nup98/Cdkn1b |
| REACTOME_SPRY_REGULATION_OF_FGF_SIGNALING | REACTOME_SPRY_REGULATION_OF_FGF_SIGNALING | 17 | -0.593890627 | -1.879723861 | 0.004506735 | 0.05294399 | 0.041584196 | 2117 | tags=47% | list=6% | signal=44% | Ppp2r1a/Uba52/Gm11808/Braf/Src/Mknk1/Mapk1/Grb2 |
| WP_GENE_REGULATORY_NETWORK_MODELLING_SOMITOGENESIS | WP_GENE_REGULATORY_NETWORK_MODELLING_SOMITOGENESIS | 10 | -0.705224821 | -1.869483822 | 0.004714374 | 0.05420688 | 0.042576117 | 4045 | tags=50% | list=12% | signal=44% | Hes1/Wnt3a/Ripply2/Epha4/Mesp2 |
| BIOCARTA_PYK2_PATHWAY | BIOCARTA_PYK2_PATHWAY | 25 | -0.515032197 | -1.781641056 | 0.004738945 | 0.05420688 | 0.042576117 | 1265 | tags=40% | list=4% | signal=39% | Mapk14/Gnaq/Bcar1/Calm3/Jun/Prkca/Mapk1/Map2k1/Grb2/Ptk2b |
| REACTOME_SEPARATION_OF_SISTER_CHROMATIDS | REACTOME_SEPARATION_OF_SISTER_CHROMATIDS | 187 | 0.322137059 | 1.505229036 | 0.004725334 | 0.05420688 | 0.042576117 | 6390 | tags=29% | list=18% | signal=24% | Dynll2/Clasp1/Tubb3/Ndel1/Ppp2r5b/Rad21/Zwint/Tuba1b/Dync1li2/Psmc5/Cenpi/Clasp2/Ppp2cb/Dync1h1/Cenpo/Psmb10/Cenps/Anapc15/Rangap1/Hdac8/Nudc/Pmf1/Tuba1a/Anapc11/Mis12/Zw10/Anapc2/Cenpq/Tubb4a/Cenpc1/Ubc/Cenpt/Nup160/Tubb4b/Cenpn/Anapc7/Mad2l1/Psme2/Ckap5/Ppp2r1b/Tuba1c/Psme1/Cenpl/Pafah1b1/Psmd1/Anapc5/Psmd12/Ndc80/Pttg1/Mapre1/Incenp/Ube2e1/Cenpf/Nup98 |
| REACTOME_G_ALPHA_12_13_SIGNALLING_EVENTS | REACTOME_G_ALPHA_12_13_SIGNALLING_EVENTS | 76 | -0.355235307 | -1.614647434 | 0.004872416 | 0.055248961 | 0.043394607 | 2886 | tags=28% | list=8% | signal=25% | Arhgef2/Arhgef7/Akap13/Arhgef6/Kalrn/Gng7/Trio/Arhgef9/Rhob/Arhgef26/Arhgef3/Gnb2/Net1/Arhgef17/Gng2/Plekhg5/Abr/Adra1d/Fgd4/Gng10/Arhgef25 |
| REACTOME_TP53_REGULATES_TRANSCRIPTION_OF_DNA_REPAIR_GENES | REACTOME_TP53_REGULATES_TRANSCRIPTION_OF_DNA_REPAIR_GENES | 43 | -0.421944566 | -1.690992927 | 0.005187307 | 0.057886492 | 0.045466223 | 8423 | tags=49% | list=24% | signal=37% | Ctdp1/Polr2d/Gtf2h3/Gtf2f1/Supt5/Supt4a/Polr2a/Polr2h/Tcea1/Gtf2h2/Mnat1/Ercc3/Ccnh/Polr2g/Gtf2f2/Elob/Cdk9/Polr2f/Gtf2h5/Ssrp1/Polr2e |
| REACTOME_RHO_GTPASE_EFFECTORS | REACTOME_RHO_GTPASE_EFFECTORS | 245 | -0.251488877 | -1.347211803 | 0.005193803 | 0.057886492 | 0.045466223 | 3299 | tags=19% | list=9% | signal=17% | Clip1/Rac1/Cenpa/Mapk14/Ywhab/Brk1/Ywhah/Srf/Sec13/Lin7b/Seh1l/Rhob/Arpc3/Ahctf1/Actg1/Ywhaz/Src/Ywhae/Dlg4/Diaph2/Baiap2/Rcc2/Calm2/Actr2/Kntc1/Nf2/Dynll1/Calm3/Ppp1cc/Pfn2/Actb/Arpc1a/Nckap1/Mapk1/Cyfip1/Pfn1/Arpc4/Iqgap2/Wasf1/Abi1/Diaph1/Grb2/Arpc2/Actr3/Mrtfa/Arpc5 |
| REACTOME_MHC_CLASS_II_ANTIGEN_PRESENTATION | REACTOME_MHC_CLASS_II_ANTIGEN_PRESENTATION | 131 | 0.348074631 | 1.553266541 | 0.005280298 | 0.058351767 | 0.045831668 | 6196 | tags=30% | list=18% | signal=25% | Dynll2/Tubb3/Osbpl1a/Kif21a/Dnm3/Tuba1b/Racgap1/Klc4/Dync1li2/Canx/Kif1a/Dync1h1/Ap1b1/Cltc/Kif16b/Sec31a/Kif5b/Kif22/Actr1a/Ctsf/Tuba1a/Tubb4a/Kif21b/Ctsb/Tubb4b/Lgmn/Kif23/Ctsk/Ctso/Tuba1c/Sec24b/Sec24a/Ap1s3/Klc2/Kif4/Sec24c/Ap1m2/Kifap3/Ctsl |
| REACTOME_CHONDROITIN_SULFATE_DERMATAN_SULFATE_METABOLISM | REACTOME_CHONDROITIN_SULFATE_DERMATAN_SULFATE_METABOLISM | 48 | -0.403725365 | -1.653628482 | 0.005496627 | 0.060231944 | 0.047308429 | 2398 | tags=23% | list=7% | signal=21% | Arsb/Gpc1/Chst7/B3galt6/Chst11/Chst9/Chpf/Chst15/Ust/B3gat1/Gpc4 |
| REACTOME_NEGATIVE_REGULATION_OF_MAPK_PATHWAY | REACTOME_NEGATIVE_REGULATION_OF_MAPK_PATHWAY | 43 | -0.418856155 | -1.678615754 | 0.005653873 | 0.060468009 | 0.047493843 | 2922 | tags=30% | list=8% | signal=28% | Ywhab/Dusp2/Brap/Uba52/Gm11808/Dusp4/Braf/Pebp1/Dusp5/Mark3/Mapk1/Map2k1/Ksr1 |
| REACTOME_GLYCOSAMINOGLYCAN_METABOLISM | REACTOME_GLYCOSAMINOGLYCAN_METABOLISM | 120 | -0.294813735 | -1.466343604 | 0.005657283 | 0.060468009 | 0.047493843 | 2533 | tags=20% | list=7% | signal=19% | Slc35b2/Arsb/Slc35d2/B4galt1/Gpc1/Slc35b3/Chst7/B4galt6/B4gat1/Cemip/Ndst4/B3galt6/Chst11/Chst9/Chst2/Galns/Chpf/Chst15/Ust/B3gat1/Gpc4/Chst1/Hs3st4/B4galt4 |
| WP_REGULATION_OF_ACTIN_CYTOSKELETON | WP_REGULATION_OF_ACTIN_CYTOSKELETON | 147 | -0.285776818 | -1.456797526 | 0.005622291 | 0.060468009 | 0.047493843 | 3236 | tags=23% | list=9% | signal=21% | Rac1/Actn1/Arhgef7/Brk1/Myl1/Mos/Arhgef6/Pip4k2c/Fgf10/Actg1/Braf/Pik3r2/Pik3cb/Bcar1/Git1/Baiap2/Fgf5/Fgf13/Actb/Nckap1/Pip5k1b/Mapk1/Pfn1/Wasf1/Map2k1/Chrm1/Rras2/Pip5k1a/Fgf16/Fgfr1/Diaph1/Arhgef4/Arpc5/Tmsb4x |
| REACTOME_SIGNALING_BY_ROBO_RECEPTORS | REACTOME_SIGNALING_BY_ROBO_RECEPTORS | 21 | -0.539315 | -1.794701602 | 0.005730536 | 0.060723164 | 0.047694251 | 3263 | tags=38% | list=9% | signal=35% | Cxcr4/Uba52/Gm11808/Gpc1/Slit3/Pfn2/Abl2/Pfn1 |
| REACTOME_COPI_INDEPENDENT_GOLGI_TO_ER_RETROGRADE_TRAFFIC | REACTOME_COPI_INDEPENDENT_GOLGI_TO_ER_RETROGRADE_TRAFFIC | 47 | 0.456366727 | 1.71717602 | 0.005774289 | 0.060723164 | 0.047694251 | 7954 | tags=49% | list=23% | signal=38% | Dynll2/Agpat3/Tubb3/Rab3gap2/Tuba1b/Dync1li2/Bicd2/Dync1h1/Actr1a/Tuba1a/Tubb4a/Pla2g6/Tubb4b/Rab3gap1/Bicd1/Tuba1c/Pafah1b1/Galnt1/Pafah1b3/Pafah1b2/Pla2g4a/Rab6b/Dctn3 |
| WP_FATTY_ACID_BIOSYNTHESIS | WP_FATTY_ACID_BIOSYNTHESIS | 22 | 0.557686474 | 1.750781906 | 0.005919545 | 0.061752698 | 0.048502886 | 6494 | tags=50% | list=19% | signal=41% | Acsl6/Acly/Acaca/Pcx/Echdc1/Decr1/Acss2/Hadh/Scd1/Acsl3/Fasn |
| REACTOME_EPHRIN_SIGNALING | REACTOME_EPHRIN_SIGNALING | 18 | -0.572641344 | -1.83205281 | 0.006371165 | 0.063480399 | 0.049859887 | 3236 | tags=44% | list=9% | signal=40% | Rac1/Arhgef7/Fyn/Ephb2/Src/Git1/Sdcbp/Nck2 |
| BIOCARTA_MEF2D_PATHWAY | BIOCARTA_MEF2D_PATHWAY | 15 | -0.593987396 | -1.816937296 | 0.006260095 | 0.063480399 | 0.049859887 | 2372 | tags=47% | list=7% | signal=44% | Calm1/Mef2d/Hdac2/Calm3/Ppp3cb/Prkca/Ppp3ca |
| BIOCARTA_MCALPAIN_PATHWAY | BIOCARTA_MCALPAIN_PATHWAY | 19 | 0.599507894 | 1.803871948 | 0.006357374 | 0.063480399 | 0.049859887 | 7487 | tags=47% | list=22% | signal=37% | Prkacb/Prkar2b/Capn2/Egfr/Prkar1b/Itga1/Prkar1a/Prkar2a/Itgb1 |
| REACTOME_HDACS_DEACETYLATE_HISTONES | REACTOME_HDACS_DEACETYLATE_HISTONES | 22 | -0.533528616 | -1.787815859 | 0.006377249 | 0.063480399 | 0.049859887 | 8453 | tags=64% | list=24% | signal=48% | Sap30/Mbd3/Kdm1a/Phf21a/Brms1/Chd3/Mta1/Rcor1/Suds3/Chd4/Gatad2b/Hdac1/Rbbp7/Mta2 |
| REACTOME_GLUTAMATE_AND_GLUTAMINE_METABOLISM | REACTOME_GLUTAMATE_AND_GLUTAMINE_METABOLISM | 13 | 0.644551312 | 1.759345302 | 0.0063425 | 0.063480399 | 0.049859887 | 7624 | tags=85% | list=22% | signal=66% | Gls2/Oat/Aldh18a1/Pycrl/Rimklb/Glud1/Kyat1/Pycr1/Rimkla/Got2/Glul |
| BIOCARTA_TCR_PATHWAY | BIOCARTA_TCR_PATHWAY | 41 | -0.42454123 | -1.668408261 | 0.006276301 | 0.063480399 | 0.049859887 | 1519 | tags=24% | list=4% | signal=23% | Fyn/Calm3/Rasa1/Ppp3cb/Jun/Prkca/Elk1/Ppp3ca/Map2k1/Grb2 |
| BIOCARTA_SHH_PATHWAY | BIOCARTA_SHH_PATHWAY | 15 | 0.648130063 | 1.838262903 | 0.006749449 | 0.064715303 | 0.050829827 | 1503 | tags=47% | list=4% | signal=45% | Shh/Ptch1/Prkacb/Prkar2b/Gli1/Gsk3b/Prkar1b |
| REACTOME_IONOTROPIC_ACTIVITY_OF_KAINATE_RECEPTORS | REACTOME_IONOTROPIC_ACTIVITY_OF_KAINATE_RECEPTORS | 12 | -0.636093601 | -1.794951739 | 0.006610304 | 0.064715303 | 0.050829827 | 4694 | tags=75% | list=13% | signal=65% | Calm1/Ncald/Grik2/Dlg4/Calm2/Calm3/Dlg3/Grik5/Grik4 |
| WP_NOVEL_JUNDMP1_PATHWAY | WP_NOVEL_JUNDMP1_PATHWAY | 25 | -0.497658305 | -1.721539884 | 0.006720498 | 0.064715303 | 0.050829827 | 1673 | tags=44% | list=5% | signal=42% | Hras/Ets2/Trp53/Myc/Braf/Ccnd1/Rb1/Jun/Mapk1/Map2k1/Arf1 |
| REACTOME_NEUROTRANSMITTER_RELEASE_CYCLE | REACTOME_NEUROTRANSMITTER_RELEASE_CYCLE | 51 | 0.429469992 | 1.648220789 | 0.00666011 | 0.064715303 | 0.050829827 | 6142 | tags=43% | list=18% | signal=36% | Cplx1/Apba1/Stxbp1/Abat/Slc6a1/Gls2/Cask/Aldh5a1/Slc38a2/Slc32a1/Gad1/Slc6a11/Lin7a/Dnajc5/Gad2/Slc1a6/Slc22a2/Chat/Slc5a7/Unc13b/Slc18a3/Hspa8 |
| REACTOME_NEGATIVE_REGULATION_OF_FGFR3_SIGNALING | REACTOME_NEGATIVE_REGULATION_OF_FGFR3_SIGNALING | 29 | -0.45122162 | -1.6445147 | 0.006711418 | 0.064715303 | 0.050829827 | 2117 | tags=31% | list=6% | signal=29% | Uba52/Gm11808/Braf/Src/Fgf5/Mknk1/Mapk1/Fgf16/Grb2 |
| REACTOME_RHO_GTPASE_CYCLE | REACTOME_RHO_GTPASE_CYCLE | 421 | 0.267777839 | 1.353639311 | 0.00698381 | 0.066473632 | 0.052210885 | 4890 | tags=25% | list=14% | signal=22% | Mcf2/Pik3r3/Rnd1/Dst/Pik3ca/Ralbp1/Dlc1/Akap12/Vapb/Sos2/Cdc42ep3/Pcdh7/Samm50/Hgs/Rnd3/Arhgef15/Tuba1b/Rnd2/Racgap1/Pik3r1/Rhov/Ckb/Garre1/Ankrd26/Maco1/Chn2/Msi2/Stam2/Aldh3a2/Rhobtb2/Wwp2/Fermt2/Arhgap32/Hsp90aa1/Csk/Arhgap35/Frs3/Txnl1/Arhgap11a/Pak1/Arhgef16/Cltc/Efhd2/Prag1/Arhgef10l/Tnfaip1/Myo6/Ktn1/Nudc/Farp1/Arhgap31/Arhgap22/Arhgap26/Arhgap42/Atp6ap1/Stip1/Gna13/Ankfy1/Esyt1/Tmod3/Bcap31/Rac3/Cdc42ep2/Arhgap5/Arhgdig/Nsfl1c/Jup/Farp2/Fam13b/Rhoq/Dock1/Srgap2/Scrib/Gmip/Fam91a1/Syde1/Stk38/Senp1/Stam/Srgap1/Arfgap3/Grb7/Plekhg6/Gja1/Arap2/Nhs/Arhgap18/Vav2/Pkn2/Arhgef18/Itsn1/Snap23/Stbd1/Tor1aip1/Arhgap6/Rhpn2/Stom/Pard6a/Wasf3/Stmn2/Plxnb1/Ccp110/Ptpn13/Spen/Fam83b/Fam169a/Sptbn1 |
| BIOCARTA_PRC2_PATHWAY | BIOCARTA_PRC2_PATHWAY | 10 | -0.689801955 | -1.828599273 | 0.007177686 | 0.066855014 | 0.052510437 | 2371 | tags=50% | list=7% | signal=47% | Bmi1/Hdac2/Ezh1/Yy1/Rbbp7 |
| REACTOME_ACTIVATION_OF_KAINATE_RECEPTORS_UPON_GLUTAMATE_BINDING | REACTOME_ACTIVATION_OF_KAINATE_RECEPTORS_UPON_GLUTAMATE_BINDING | 31 | -0.466176931 | -1.736057289 | 0.007084577 | 0.066855014 | 0.052510437 | 1912 | tags=45% | list=5% | signal=43% | Calm1/Ncald/Plcb2/Gng7/Grik2/Gnb2/Dlg4/Calm2/Calm3/Gng2/Dlg3/Grik5/Grik4/Gng10 |
| WP_GPCRS_NONODORANT | WP_GPCRS_NONODORANT | 253 | 0.294247448 | 1.420028838 | 0.007148455 | 0.066855014 | 0.052510437 | 6244 | tags=27% | list=18% | signal=23% | Hrh2/Pth2r/Opn3/Hrh1/Chrm2/Grm4/Adra1b/Npsr1/Adrb1/Adgrl2/Hrh3/Hcrtr2/Pth1r/Grm8/Ntsr1/Tacr3/Crhr1/Oprk1/Grm3/Htr7/Fzd1/Agtr1b/Ptger3/Adra1a/Ptgfr/Fzd2/Oprm1/Htr5a/Qrfpr/Sstr1/Galr1/Ccr10/Adra2a/Gpr17/Hcrtr1/Galr2/Adgrl3/Kiss1r/Rxfp1/Gabbr2/Gper1/Gpr15/Sucnr1/Sstr2/Adrb3/Gpr6/S1pr1/Gprc5a/Uts2r/Htr1b/Cckbr/P2ry14/Cysltr2/Trhr/Bdkrb2/Adcyap1r1/P2ry10/Ntsr2/Taar1/Fzd5/Aplnr/Opn4/Mc3r/Mtnr1a/Htr2c/Ptgdr/Tacr1/S1pr5/Rxfp2 |
| BIOCARTA_BTG2_PATHWAY | BIOCARTA_BTG2_PATHWAY | 10 | -0.687479127 | -1.822441676 | 0.007432512 | 0.068737555 | 0.053989055 | 5258 | tags=70% | list=15% | signal=59% | Btg2/Trp53/Ngf/Btg1/Chaf1a/Ccnd1/Rb1 |
| BIOCARTA_CCR5_PATHWAY | BIOCARTA_CCR5_PATHWAY | 16 | -0.582714984 | -1.804746008 | 0.007663972 | 0.070058866 | 0.055026862 | 4694 | tags=56% | list=13% | signal=49% | Calm1/Ccl2/Cxcr4/Mapk14/Gnaq/Calm3/Jun/Prkca/Ptk2b |
| REACTOME_METABOLISM_OF_AMINO_ACIDS_AND_DERIVATIVES | REACTOME_METABOLISM_OF_AMINO_ACIDS_AND_DERIVATIVES | 252 | 0.290356084 | 1.402234948 | 0.007682836 | 0.070058866 | 0.055026862 | 5176 | tags=24% | list=15% | signal=21% | Ckb/Azin2/Ethe1/Scly/Psmc5/Nat8l/Gls2/Ass1/Asrgl1/Got1/Oat/Slc5a5/Slc36a4/Agmat/Aldh18a1/Azin1/Ogdh/Amt/Bckdhb/Sdsl/Slc6a8/Psmb10/Ado/Ido1/Slc6a11/Ckmt1/Pycrl/Asl/Gpt/Th/Naalad2/Rimklb/Glud1/Kyat1/Hibadh/Slc6a7/Amd1/Cth/Dlst/Oaz2/Gcdh/Slc25a2/Aanat/Psme2/Suox/Fah/Aldh7a1/Folh1/Bcat1/Aldh6a1/Gatm/Psme1/Slc25a15/Gcsh/Smox/Aspg/Dao/Mtap/Pycr1/Tshb/Psmd1 |
| REACTOME_BIOTIN_TRANSPORT_AND_METABOLISM | REACTOME_BIOTIN_TRANSPORT_AND_METABOLISM | 11 | 0.678975315 | 1.791509074 | 0.00793387 | 0.071607432 | 0.056243164 | 8043 | tags=55% | list=23% | signal=42% | Acaca/Pcx/Slc5a6/Hlcs/Mccc1/Btd |
| REACTOME_FCERI_MEDIATED_CA_2_MOBILIZATION | REACTOME_FCERI_MEDIATED_CA_2_MOBILIZATION | 29 | -0.446968344 | -1.629013282 | 0.007985097 | 0.071607432 | 0.056243164 | 956 | tags=21% | list=3% | signal=20% | Calm2/Calm3/Ppp3cb/Ppp3ca/Ppp3r1/Grb2 |
| WP_MECP2_AND_ASSOCIATED_RETT_SYNDROME | WP_MECP2_AND_ASSOCIATED_RETT_SYNDROME | 44 | -0.402281415 | -1.62399563 | 0.008017397 | 0.071607432 | 0.056243164 | 3655 | tags=34% | list=11% | signal=31% | Ncor1/Sp3/Ctcf/Apoc2/Myt1/Gprin1/Arhgef26/Grin1/Bdnf/Bcl6/Fut8/Ybx1/Rbfox1/Cebpd/Cdon |
| BIOCARTA_DREAM_PATHWAY | BIOCARTA_DREAM_PATHWAY | 12 | 0.638023597 | 1.719704778 | 0.008292138 | 0.072086316 | 0.056619298 | 4751 | tags=67% | list=14% | signal=58% | Prkacb/Prkar2b/Prkar1b/Oprk1/Kcnip3/Fos/Prkar1a/Creb1 |
| WP_WNT_SIGNALING_IN_KIDNEY_DISEASE | WP_WNT_SIGNALING_IN_KIDNEY_DISEASE | 43 | 0.457775449 | 1.691204246 | 0.008251461 | 0.072086316 | 0.056619298 | 2359 | tags=26% | list=7% | signal=24% | Mapk9/Dvl3/Wnt2b/Kitl/Mapk8/Gsk3b/Wnt4/Wnt6/Fzd1/Apc/Fzd2 |
| REACTOME_TOLL_LIKE_RECEPTOR_CASCADES | REACTOME_TOLL_LIKE_RECEPTOR_CASCADES | 145 | 0.326387922 | 1.478220888 | 0.008209865 | 0.072086316 | 0.056619298 | 8877 | tags=38% | list=26% | signal=28% | Mapk9/Dnm3/Nkiras1/Ptpn4/Mapk8/Birc2/Ppp2cb/Rps6ka3/Mapk11/S100a1/Peli3/App/Hsp90b1/Nfkbib/Sftpa1/S100b/Tifa/Ctsb/Ubc/N4bp1/Nod2/Ikbkb/Lgmn/Atf2/Fos/Bpi/Usp18/Ctsk/Ppp2r1b/Rps6ka5/Traf2/Irf7/Creb1/Lrrc14/Gsdme/Tirap/Rela/Usp14/Irf3/Ikbkg/Map2k3/Ctsl/Map2k7/Mapkapk2/Pik3c3/Cul1/Ripk1/Nlrc5/Eea1/Dusp3/Nod1/Ppp2r5d/Mapkapk3/Pik3r4/Rbsn |
| REACTOME_CYTOKINE_SIGNALING_IN_IMMUNE_SYSTEM | REACTOME_CYTOKINE_SIGNALING_IN_IMMUNE_SYSTEM | 383 | 0.272462333 | 1.363706096 | 0.008137271 | 0.072086316 | 0.056619298 | 8821 | tags=34% | list=25% | signal=25% | Tnfrsf11b/Pik3r3/Mapk9/Pik3ca/Ppm1b/Sos2/Camk2d/Tnfrsf11a/Nkiras1/Pik3cd/Camk2g/Ifit1bl2/Cntfr/Pik3r1/Stat5b/Mapk8/Eif4e2/Birc2/Grb10/Psmc5/Crkl/Map3k14/Stx4a/Xiap/Ppp2cb/Canx/Csk/Rps6ka3/Mapk11/Cntf/Psmb10/Peli3/App/Stat6/Ptpn2/Il1rapl1/Uba3/Socs6/Eif2ak2/H3c7/Irf9/Hsp90b1/Nfkbib/Stat2/Sh2b1/Tnfrsf13c/S100b/Rnasel/Tifa/Mx2/Il11/Kras/Ubc/N4bp1/Eif4g3/Nod2/Jak2/Ikbkb/Eif4g2/Il6st/Atf2/Trim25/Isg15/Il33/Fos/Yes1/Psme2/Usp18/Shc1/Ppp2r1b/Casp3/Psme1/Rps6ka5/Tslp/Traf2/Arih1/Creb1/Eif4e/Plcg1/Lrrc14/Tollip/Psmd1/Rela/Usp14/Psmd12/Irf3/Rbx1/Casp1/Oasl1/Ptprz1/Tnfrsf14/Foxo3/Ifnlr1/Il4ra/Ikbkg/Map2k3/Ube2e1/Inppl1/Cdkn1b/Il23r/Map2k7/Mapkapk2/H3c3/Socs5/Sh2b3/Tnfsf15/Ube2l6/Uba7/Cul1/Nlrc5/Sos1/Psmc6/Il20ra/Edaradd/Il21r/Dusp3/H3c6/Tnfsf11/Ifna7/Cd70/Tnfrsf12a/H3c4/Socs3/Psmd4/Myd88/Nod1/Ghr/Ppp2r5d/Mapkapk3 |
| REACTOME_REGULATION_OF_PLK1_ACTIVITY_AT_G2_M_TRANSITION | REACTOME_REGULATION_OF_PLK1_ACTIVITY_AT_G2_M_TRANSITION | 85 | 0.373069159 | 1.556491472 | 0.008349513 | 0.072104405 | 0.056633505 | 8047 | tags=42% | list=23% | signal=33% | Clasp1/Csnk1e/Prkar2b/Optn/Cep290/Tubg1/Haus8/Alms1/Hsp90aa1/Dync1h1/Cep76/Actr1a/Tuba1a/Plk4/Cep43/Tubb4a/Haus1/Ubc/Cep41/Tubb4b/Tubb5/Ckap5/Ccp110/Nedd1/Akap9/Pafah1b1/Ccnb1/Mapre1/Haus7/Rab8a/Cep164/Cenpj/Cul1/Pcm1/Dctn3/Cep131 |
| BIOCARTA_CDMAC_PATHWAY | BIOCARTA_CDMAC_PATHWAY | 15 | -0.580405354 | -1.775391431 | 0.008448908 | 0.072482734 | 0.056930659 | 1673 | tags=53% | list=5% | signal=51% | Plcb1/Nfkbia/Hras/Myc/Jun/Prkca/Mapk1/Map2k1 |
| BIOCARTA_IGF1MTOR_PATHWAY | BIOCARTA_IGF1MTOR_PATHWAY | 18 | 0.577234234 | 1.723308311 | 0.008775514 | 0.073827552 | 0.057986929 | 7214 | tags=50% | list=21% | signal=40% | Pik3ca/Pik3r1/Gsk3b/Igf1/Eif2s1/Eif4e/Inppl1/Pten/Eif2s3x |
| REACTOME_PROCESSIVE_SYNTHESIS_ON_THE_C_STRAND_OF_THE_TELOMERE | REACTOME_PROCESSIVE_SYNTHESIS_ON_THE_C_STRAND_OF_THE_TELOMERE | 17 | 0.580860339 | 1.691011659 | 0.00868635 | 0.073827552 | 0.057986929 | 10708 | tags=65% | list=31% | signal=45% | Lig1/Pot1a/Dna2/Pold1/Terf1/Pold2/Wrn/Blm/Rpa3/Acd/Terf2 |
| REACTOME_RAF_ACTIVATION | REACTOME_RAF_ACTIVATION | 35 | -0.434366397 | -1.664152368 | 0.008758311 | 0.073827552 | 0.057986929 | 5297 | tags=46% | list=15% | signal=39% | Hras/Calm1/Ppp2r1a/Ppp1cb/Ywhab/Brap/Braf/Src/Calm2/Calm3/Ppp1cc/Camk2a/Mark3/Map2k1/Ksr1/Camk2b |
| REACTOME_SYNDECAN_INTERACTIONS | REACTOME_SYNDECAN_INTERACTIONS | 14 | 0.620235698 | 1.735074869 | 0.00890417 | 0.074429725 | 0.058459898 | 9359 | tags=57% | list=27% | signal=42% | Sdc2/Vtn/Itgav/Itgb3/Sdc3/Itgb1/Itga6/Itgb4 |
| REACTOME_MITOTIC_METAPHASE_AND_ANAPHASE | REACTOME_MITOTIC_METAPHASE_AND_ANAPHASE | 225 | 0.29177728 | 1.392828588 | 0.009046691 | 0.075139395 | 0.0590173 | 6401 | tags=27% | list=18% | signal=22% | Dynll2/Clasp1/Tubb3/Ndel1/Ppp2r5b/Rad21/Zwint/Tuba1b/Dync1li2/Psmc5/Rcc1/Cenpi/Clasp2/Ppp2cb/Dync1h1/Cenpo/Psmb10/Cenps/Anapc15/Rangap1/Hdac8/Nudc/Pmf1/Tuba1a/Anapc11/Mis12/Zw10/Anapc2/Cenpq/Tubb4a/Cenpc1/Ubc/Cenpt/Nup160/Tubb4b/Cenpn/Anapc7/Mad2l1/Lmna/Psme2/Ckap5/Ppp2r1b/Tuba1c/Psme1/Cenpl/Pafah1b1/Cc2d1b/Psmd1/Ccnb1/Anapc5/Psmd12/Ndc80/Nup205/Pttg1/Mapre1/Incenp/Ube2e1/Vps4a/Cenpf/Nup98/Nup188 |
| REACTOME_MRNA_CAPPING | REACTOME_MRNA_CAPPING | 28 | -0.471946275 | -1.707083395 | 0.009404968 | 0.077620751 | 0.06096625 | 7913 | tags=57% | list=23% | signal=44% | Polr2d/Gtf2h3/Gtf2f1/Supt5/Polr2a/Polr2h/Gtf2h2/Mnat1/Ercc3/Ccnh/Polr2g/Gtf2f2/Polr2f/Gtf2h5/Ncbp1/Polr2e |
| BIOCARTA_GSK3_PATHWAY | BIOCARTA_GSK3_PATHWAY | 21 | 0.541470487 | 1.677247987 | 0.009685227 | 0.07943104 | 0.062388119 | 3535 | tags=38% | list=10% | signal=34% | Pik3ca/Pik3r1/Gsk3b/Fzd1/Eif2ak2/Apc/Lef1/Gja1 |
| REACTOME_INCRETIN_SYNTHESIS_SECRETION_AND_INACTIVATION | REACTOME_INCRETIN_SYNTHESIS_SECRETION_AND_INACTIVATION | 10 | 0.689566647 | 1.770205216 | 0.009797699 | 0.079665999 | 0.062572664 | 1935 | tags=20% | list=6% | signal=19% | Dpp4/Gnb1 |
| REACTOME_AMINO_ACID_TRANSPORT_ACROSS_THE_PLASMA_MEMBRANE | REACTOME_AMINO_ACID_TRANSPORT_ACROSS_THE_PLASMA_MEMBRANE | 32 | 0.478797619 | 1.631472945 | 0.009897156 | 0.079665999 | 0.062572664 | 2684 | tags=31% | list=8% | signal=29% | Slc38a1/Slc43a2/Slc7a3/Slc36a1/Slc1a4/Slc38a2/Slc36a4/Slc7a11/Slc7a10/Slc7a1 |
| WP_ADIPOGENESIS_GENES | WP_ADIPOGENESIS_GENES | 131 | 0.335366071 | 1.496555193 | 0.009894039 | 0.079665999 | 0.062572664 | 5118 | tags=31% | list=15% | signal=27% | Ppard/Rora/Ppargc1a/Bscl2/Klf6/Cntfr/E2f1/Stat5b/Hmga1/Spock1/Nr3c1/Klf7/Ppara/Stat6/Rxra/Lpin1/Fzd1/Sp1/Pnpla3/Mif/Gadd45a/Igf1/Stat2/Hnf1a/Nr2f1/Rbl1/Mbnl1/Il6st/Rbl2/Ncoa2/Bmp2/Lmna/Epas1/Rxrg/Zmpste24/Ddit3/Scd1/Foxc2/Creb1/Nsg1/Stat1 |
| BIOCARTA_TNFR2_PATHWAY | BIOCARTA_TNFR2_PATHWAY | 17 | 0.576789576 | 1.679160779 | 0.010081215 | 0.080649723 | 0.063345318 | 7595 | tags=47% | list=22% | signal=37% | Map3k14/Ikbkb/Traf2/Rela/Ikbkg/Dusp1/Ripk1/Map3k1 |
| REACTOME_ANTIGEN_PROCESSING_UBIQUITINATION_PROTEASOME_DEGRADATION | REACTOME_ANTIGEN_PROCESSING_UBIQUITINATION_PROTEASOME_DEGRADATION | 297 | 0.280544448 | 1.373072235 | 0.010581156 | 0.08413309 | 0.066081286 | 6388 | tags=30% | list=18% | signal=25% | Fbxo9/Uba6/Hecw2/Asb13/Rnf217/Rnf130/Lrsam1/Ube2o/Glmn/Kctd7/Lnx1/Wwp1/Psmc5/Cul7/Znrf1/Npepps/Herc6/Ube2j1/Asb2/Ube2f/Psmb10/Ubr4/Rnf14/Asb16/Klhl42/Rnf4/Uba3/Fbxo44/Fbxo22/Trim37/Fbxw17/Fbxl21/Herc4/Anapc11/Rnf6/Anapc2/Ube2q2/Fbxo40/Lonrf1/Rnf111/Ubac1/Klhl41/Fbxo30/Spsb4/Ube2h/Rnf41/Ubc/Rnf114/Hectd3/Unkl/Fbxl14/Ltn1/Anapc7/Smurf1/Dcaf1/Ube2v2/Siah2/Uba5/Btbd1/Psme2/Rnf213/Klhl25/Trim50/Fbxo2/Trim21/Psme1/Huwe1/Itch/Rnf220/Mgrn1/Rnf144b/Stub1/Fbxl19/Ube3a/Psmd1/Anapc5/Fbxl4/Psmd12/Asb4/Rbx1/Lnpep/Herc1/Ube2e1/Mib2/Klhl20/Atg7/Fbxo7/Skp2/Fbxl8 |
| REACTOME_NEUROTRANSMITTER_RECEPTORS_AND_POSTSYNAPTIC_SIGNAL_TRANSMISSION | REACTOME_NEUROTRANSMITTER_RECEPTORS_AND_POSTSYNAPTIC_SIGNAL_TRANSMISSION | 140 | 0.316935172 | 1.429510117 | 0.010772627 | 0.085136396 | 0.06686932 | 5239 | tags=35% | list=15% | signal=30% | Kcnj12/Gria4/Chrna4/Grip2/Prkacb/Glrb/Camk1/Kcnj9/Cacng2/Adcy8/Prkar2b/Camk2d/Gabra1/Camk2g/Glra3/Gnal/Gabra3/Chrnb3/Adcy5/Pick1/Kcnj16/Rps6ka3/Kcnj10/Prkar1b/Grik1/Grin3a/Gnb1/Gabrg3/Myo6/Gnb4/Adcy6/Chrna6/Glra2/Gng4/Grik3/Dlg1/Gabbr2/Gabrb2/Kcnj5/Adcy3/Gng3/Prkar1a/Gnai2/Cacng4/Creb1/Grin2c/Gabrq/Grin2d/Plcb3 |
| REACTOME_CELL_DEATH_SIGNALLING_VIA_NRAGE_NRIF_AND_NADE | REACTOME_CELL_DEATH_SIGNALLING_VIA_NRAGE_NRIF_AND_NADE | 71 | -0.335633236 | -1.509499379 | 0.011052666 | 0.086823353 | 0.068194319 | 3236 | tags=27% | list=9% | signal=24% | Rac1/Arhgef2/Arhgef7/Akap13/Arhgef6/Uba52/Kalrn/Gm11808/Trio/Arhgef9/Arhgef26/Arhgef3/Ywhae/Net1/Arhgef17/Plekhg5/Abr/Fgd4/Arhgef25 |
| REACTOME_INTRA_GOLGI_AND_RETROGRADE_GOLGI_TO_ER_TRAFFIC | REACTOME_INTRA_GOLGI_AND_RETROGRADE_GOLGI_TO_ER_TRAFFIC | 184 | 0.298588469 | 1.393287849 | 0.011157561 | 0.087122511 | 0.068429289 | 6241 | tags=29% | list=18% | signal=24% | Dynll2/Agpat3/Tubb3/Kif21a/Golga4/Rab3gap2/Tuba1b/Racgap1/Rint1/Klc4/Dync1li2/Copa/Usp6nl/Gbf1/Cog6/Bicd2/Rab1a/Kif1a/Dync1h1/Kif16b/Kif5b/Kif22/Actr1a/Tuba1a/Zw10/Rhobtb3/Tmf1/Golga1/Tubb4a/Kif21b/Trip11/Pla2g6/Tubb4b/Vti1a/Arfgap3/Kif23/Rab3gap1/Tmed3/Bicd1/Nbas/Tuba1c/Copg1/Arfrp1/Kdelr2/Rab30/Pafah1b1/Klc2/Galnt1/Kif4/Scoc/Rab9/Kifap3/Tgoln1/Pafah1b3 |
| BIOCARTA_ATRBRCA_PATHWAY | BIOCARTA_ATRBRCA_PATHWAY | 18 | 0.569355894 | 1.699787861 | 0.011513932 | 0.088318632 | 0.069368767 | 9368 | tags=67% | list=27% | signal=49% | Rad9a/Nbn/Fancc/Atr/Hus1/Rad51/Fancg/Brca2/Brca1/Rad17/Mre11a/Fanca |
| REACTOME_SYNTHESIS_OF_PE | REACTOME_SYNTHESIS_OF_PE | 12 | 0.626288226 | 1.688073702 | 0.011506089 | 0.088318632 | 0.069368767 | 6134 | tags=58% | list=18% | signal=48% | Etnk1/Cept1/Etnk2/Selenoi/Lpin1/Etnppl/Pcyt2 |
| REACTOME_CARBOXYTERMINAL_POST_TRANSLATIONAL_MODIFICATIONS_OF_TUBULIN | REACTOME_CARBOXYTERMINAL_POST_TRANSLATIONAL_MODIFICATIONS_OF_TUBULIN | 27 | 0.509343748 | 1.669321962 | 0.011428677 | 0.088318632 | 0.069368767 | 6147 | tags=41% | list=18% | signal=34% | Tubb3/Ttll7/Tuba1b/Tuba1a/Ttll5/Tubb4a/Tubb4b/Tuba1c/Ttll12/Ttll10/Ttll3 |
| BIOCARTA_BIOPEPTIDES_PATHWAY | BIOCARTA_BIOPEPTIDES_PATHWAY | 28 | -0.465128192 | -1.682421617 | 0.011655193 | 0.088373097 | 0.069411546 | 1519 | tags=39% | list=4% | signal=38% | Hras/Calm1/Mapk14/Fyn/Gna11/Calm3/Prkca/Mapk1/Map2k1/Grb2/Ptk2b |
| WP_FOCAL_ADHESION_PI3KAKTMTOR_SIGNALING_PATHWAY | WP_FOCAL_ADHESION_PI3KAKTMTOR_SIGNALING_PATHWAY | 299 | 0.276994201 | 1.357368472 | 0.011656574 | 0.088373097 | 0.069411546 | 8747 | tags=35% | list=25% | signal=27% | Pik3ca/Fgf12/Tsc1/Chrm2/Ppargc1a/Fgf9/Ppp2r5b/Efna5/Kitl/Acaca/Fgf22/Vegfa/Pik3cd/Atf4/Prkaa2/Pik3r1/Itga3/Eif4e2/Thbs2/Ppp2cb/Vegfb/Hsp90aa1/Egfr/Gsk3b/Nos2/Rab11b/Phlpp2/Gnb1/Fgf14/Vtn/Nras/Lamc2/Gnb4/Igf1/Fgf3/Lama4/Itga10/Hsp90b1/Ulk1/Itgav/Gng4/Fgfr3/Itgb3/Kras/Jak2/Ikbkb/Ppp2r3c/Atf2/Gys1/Pelo/Comp/Mtcp1/Rptor/Epas1/Gng3/Itga9/Ppp2r3a/Ppp2r1b/Spp1/Stk11/Col6a2/Creb1/Eif4e/Fgf1/Cab39l/Flt1/Fgf20/Lama3/Foxo3/Ppp2r2b/Il4ra/Ikbkg/Itgae/Col5a1/Ngfr/Pik3c2g/Angpt4/Lamc3/Angpt1/Cdkn1b/Rab8a/Pten/Cdkn1a/Jak3/Gng5/Lama1/Slc2a4/Fgf18/Itgb1/Sos1/Pfkfb4/Itga6/Phlpp1/Itga2b/Pdgfrb/Pdgfra/Reln/Ifna7/Pik3c2b/Ppp2r5e/Ppp2r5a/Lpar1/Ghr/Fgf15/Ppp2r5d |
| REACTOME_HOMOLOGOUS_DNA_PAIRING_AND_STRAND_EXCHANGE | REACTOME_HOMOLOGOUS_DNA_PAIRING_AND_STRAND_EXCHANGE | 26 | 0.49927323 | 1.627034628 | 0.011825715 | 0.089137181 | 0.070011686 | 9372 | tags=62% | list=27% | signal=45% | Rad51d/Nbn/Rad51c/Xrcc2/Kat5/Brip1/Dna2/Rbbp8/Rad51/Wrn/Brca2/Brca1/Top3a/Mre11a/Rmi1/Blm |
| REACTOME_G_ALPHA_I_SIGNALLING_EVENTS | REACTOME_G_ALPHA_I_SIGNALLING_EVENTS | 258 | 0.280680688 | 1.35625562 | 0.011987221 | 0.089835265 | 0.070559988 | 6256 | tags=28% | list=18% | signal=23% | Rgs17/Pde4d/Rgs6/Opn3/Rgs4/Chrm2/Grm4/Prkacb/Rgs16/Adcy8/Prkar2b/Pde4b/Gnal/Grm8/Gpsm1/Plcb4/Ppp2cb/Adcy5/Tas1r1/Prkar1b/Oprk1/Grm3/Apln/App/Ptger3/Gnb1/Cdk5/Gnb4/Adcy6/Oprm1/Htr5a/Sstr1/Galr1/Ccr10/Adra2a/Gpr17/Gng4/Oprl1/Rgs3/Galr2/Gabbr2/Cxcl11/Gper1/Pomc/Sucnr1/Sstr2/Rgs20/Adcy3/Cxcl10/Gng3/Prkar1a/Rln3/Ppp2r1b/Grk2/Htr1b/Gnai2/Nmu/P2ry14/Bdkrb2/Gpr37l1/Pde1c/Pde1b/Plcb3/Gnai1/Aplnr/Pde4a/Mtnr1a/Opn1mw/Pcp2/S1pr5/Rgs5 |
| REACTOME_ONCOGENE_INDUCED_SENESCENCE | REACTOME_ONCOGENE_INDUCED_SENESCENCE | 17 | -0.549594683 | -1.739522722 | 0.012107114 | 0.090215299 | 0.07085848 | 5036 | tags=47% | list=14% | signal=40% | Ets2/Trp53/Erf/Cdk4/Uba52/Gm11808/Cdkn2b/Mapk1 |
| REACTOME_RHOQ_GTPASE_CYCLE | REACTOME_RHOQ_GTPASE_CYCLE | 58 | 0.410382576 | 1.601103121 | 0.012580713 | 0.092602147 | 0.072733201 | 6054 | tags=38% | list=17% | signal=31% | Dlc1/Cdc42ep3/Wwp2/Arhgap32/Arhgap35/Pak1/Arhgap26/Cdc42ep2/Arhgap5/Jup/Rhoq/Srgap2/Scrib/Syde1/Gja1/Itsn1/Snap23/Stom/Arl13b/Mpp7/Fnbp1/Cftr |
| REACTOME_FORMATION_OF_TC_NER_PRE_INCISION_COMPLEX | REACTOME_FORMATION_OF_TC_NER_PRE_INCISION_COMPLEX | 53 | -0.36432855 | -1.517660037 | 0.012711491 | 0.092602147 | 0.072733201 | 6274 | tags=40% | list=18% | signal=33% | Polr2a/Cops6/Ercc6/Polr2h/Tcea1/Gtf2h2/Mnat1/Zfp830/Cops8/Gps1/Ercc3/Ccnh/Polr2g/Uba52/Xpa/Gm11808/Polr2f/Cul4a/Xab2/Gtf2h5/Polr2e |
| REACTOME_MITOTIC_G2_G2_M_PHASES | REACTOME_MITOTIC_G2_G2_M_PHASES | 183 | 0.305505728 | 1.423385719 | 0.012532095 | 0.092602147 | 0.072733201 | 5572 | tags=27% | list=16% | signal=23% | Clasp1/Tubb3/Csnk1e/Prkar2b/Tubgcp5/Tuba1b/Optn/E2f1/Cep290/Psmc5/Tubg1/Ppp2cb/Cdc25a/Haus8/Alms1/Hsp90aa1/Dync1h1/Phlda1/Psmb10/Wee1/Cep76/Hmmr/Ppme1/Pkmyt1/Actr1a/Tuba1a/Plk4/Cep43/Tubb4a/Haus1/Tubgcp6/Ubc/Cep41/Tubb4b/Tubb5/Psme2/Ckap5/Ppp2r1b/Tuba1c/Psme1/Ccp110/Nedd1/Akap9/Pafah1b1/Psmd1/Ccnb1/Psmd12/Rbx1/Tubgcp4 |
| WP_MYOMETRIAL_RELAXATION_AND_CONTRACTION_PATHWAYS | WP_MYOMETRIAL_RELAXATION_AND_CONTRACTION_PATHWAYS | 148 | -0.275054118 | -1.399303523 | 0.012708138 | 0.092602147 | 0.072733201 | 1362 | tags=19% | list=4% | signal=18% | Prkd1/Ryr2/Actg1/Dgkz/Adcy1/Gnaq/Gsto1/Pkig/Ywhaz/Ywhae/Calm3/Ryr1/Pkia/Jun/Ryr3/Actb/Prkce/Camk2a/Gng2/Prkca/Atf6b/Prkcg/Rgs19/Ramp2/Arrb2/Adcy9/Rgs14/Camk2b |
| BIOCARTA_FMLP_PATHWAY | BIOCARTA_FMLP_PATHWAY | 31 | -0.444195589 | -1.654198092 | 0.012864334 | 0.093194953 | 0.073198813 | 871 | tags=32% | list=3% | signal=31% | Hras/Calm1/Mapk14/Calm3/Ppp3cb/Camk2a/Mapk1/Elk1/Ppp3ca/Map2k1 |
| REACTOME_ASSEMBLY_OF_ACTIVE_LPL_AND_LIPC_LIPASE_COMPLEXES | REACTOME_ASSEMBLY_OF_ACTIVE_LPL_AND_LIPC_LIPASE_COMPLEXES | 11 | -0.621318104 | -1.700566367 | 0.01304823 | 0.094004928 | 0.073834997 | 5056 | tags=45% | list=15% | signal=39% | Angptl3/Furin/Pcsk5/Lipc/Lpl |
| REACTOME_ANTIGEN_PRESENTATION_FOLDING_ASSEMBLY_AND_PEPTIDE_LOADING_OF_CLASS_I_MHC | REACTOME_ANTIGEN_PRESENTATION_FOLDING_ASSEMBLY_AND_PEPTIDE_LOADING_OF_CLASS_I_MHC | 40 | 0.442022342 | 1.602299576 | 0.013399501 | 0.096005214 | 0.075406097 | 8920 | tags=50% | list=26% | signal=37% | H2-Bl/H2-Q2/Canx/Sec31a/Bcap31/Sec24b/Erap1/Sec24a/Hspa5/H2-T22/H2-M10.6/Calr/Sec24c/H2-Q1/H2-M11/Tapbp/Pdia3/Tap2/Gm7030/H2-T23 |
| REACTOME_INTERFERON_SIGNALING | REACTOME_INTERFERON_SIGNALING | 57 | 0.396848665 | 1.550267673 | 0.013631466 | 0.097133506 | 0.0762923 | 6133 | tags=40% | list=18% | signal=33% | Ppm1b/Camk2d/Camk2g/Ifit1bl2/Eif4e2/Ptpn2/Eif2ak2/Irf9/Stat2/Rnasel/Mx2/Eif4g3/Jak2/Eif4g2/Trim25/Isg15/Usp18/Arih1/Eif4e/Plcg1/Irf3/Oasl1/Ube2e1 |
| REACTOME_G_ALPHA_Q_SIGNALLING_EVENTS | REACTOME_G_ALPHA_Q_SIGNALLING_EVENTS | 203 | -0.25429492 | -1.344461707 | 0.01372575 | 0.097273791 | 0.076402485 | 3209 | tags=20% | list=9% | signal=18% | Gpr143/Plcb2/Ltb4r2/Gpr39/Cck/Dgki/Mapk7/Daglb/Npffr1/Gpr68/P2ry6/Kalrn/Gng7/Abhd6/Trio/Nmb/Rgs13/Dgkz/Grm5/Gnaq/Pik3r2/Gna11/Gnb2/Dagla/Trpc6/Abhd12/Dgkb/Prkce/Ccl9/Dgkd/Gng2/Mapk1/Dgkh/Avpr1b/Rgs19/Chrm1/Grb2/Dgkg/Adra1d/Gng10/Arhgef25 |
| REACTOME_RHO_GTPASES_ACTIVATE_FORMINS | REACTOME_RHO_GTPASES_ACTIVATE_FORMINS | 135 | 0.323585351 | 1.453840709 | 0.013943038 | 0.098279577 | 0.077192467 | 4480 | tags=26% | list=13% | signal=23% | Dynll2/Clasp1/Dvl3/Tubb3/Ndel1/Ppp2r5b/Zwint/Tuba1b/Dync1li2/Cenpi/Clasp2/Ppp2cb/Dync1h1/Cenpo/Evl/Cenps/Rangap1/Nudc/Pmf1/Tuba1a/Mis12/Zw10/Cenpq/Tubb4a/Srgap2/Cenpc1/Cenpt/Nup160/Tubb4b/Cenpn/Mad2l1/Ckap5/Ppp2r1b/Tuba1c/Cenpl |
| REACTOME_TRAFFICKING_OF_AMPA_RECEPTORS | REACTOME_TRAFFICKING_OF_AMPA_RECEPTORS | 29 | -0.424745201 | -1.548019192 | 0.014079874 | 0.098710518 | 0.077530944 | 2258 | tags=34% | list=6% | signal=32% | Ap2b1/Ap2a2/Nsf/Dlg4/Gria2/Camk2a/Prkcg/Cacng8/Gria1/Camk2b |
| WP_GLYCEROLIPIDS_AND_GLYCEROPHOSPHOLIPIDS | WP_GLYCEROLIPIDS_AND_GLYCEROPHOSPHOLIPIDS | 23 | 0.513057561 | 1.620772036 | 0.014277462 | 0.099030905 | 0.077782588 | 7573 | tags=70% | list=22% | signal=54% | Cds1/Pcyt1a/Etnk1/Ptdss1/Plpp1/Pemt/Ptdss2/Dgat1/Pnpla3/Gpat4/Gpam/Chpt1/Pcyt2/Pld1/Pnpla2/Pla2g1b |
| REACTOME_ION_CHANNEL_TRANSPORT | REACTOME_ION_CHANNEL_TRANSPORT | 174 | 0.306612188 | 1.417230052 | 0.014253027 | 0.099030905 | 0.077782588 | 6229 | tags=30% | list=18% | signal=25% | Asic1/Atp8a2/Atp6v1g1/Trpm2/Clcn5/Camk2d/Atp1b2/Clcn6/Camk2g/Atp1a2/Asic4/Atp6v0a2/Wwp1/Atp8b2/Trpc3/Mcoln1/Trpv2/Atp10a/Atp13a4/Tpcn1/Ano10/Clcn7/Ano5/Atp2a2/Atp6ap1/Fxyd6/Slc9b2/Nalcn/Atp2b2/Tsc22d3/Ttyh1/Ubc/Trpv6/Atp10b/Pln/Atp2b4/Stom/Trpc7/Fxyd7/Atp13a2/Clca1/Atp1b3/Ano8/Atp4b/Atp7a/Clcn1/Unc80/Ano4/Ttyh3/Clca4b/Trpm6/Sgk3/Atp13a5 |
| WP_SPLICING_FACTOR_NOVA_REGULATED_SYNAPTIC_PROTEINS | WP_SPLICING_FACTOR_NOVA_REGULATED_SYNAPTIC_PROTEINS | 41 | 0.437432935 | 1.605069179 | 0.014728849 | 0.101621268 | 0.079817157 | 3154 | tags=34% | list=9% | signal=31% | Clasp1/Mapk9/Epb41l3/Rap1gap/Efna5/Aplp2/Epb41l2/Camk2g/Epb41/Cask/Plcb4/Cav2/Clstn1/Gabbr2 |
| REACTOME_NEGATIVE_REGULATION_OF_FGFR2_SIGNALING | REACTOME_NEGATIVE_REGULATION_OF_FGFR2_SIGNALING | 32 | -0.435229175 | -1.640796438 | 0.014827534 | 0.101763708 | 0.079929034 | 2117 | tags=31% | list=6% | signal=29% | Uba52/Gm11808/Fgf10/Braf/Src/Fgf5/Mknk1/Mapk1/Fgf16/Grb2 |
| WP_GLYCOGEN_METABOLISM | WP_GLYCOGEN_METABOLISM | 34 | 0.459366276 | 1.587475561 | 0.01510351 | 0.102711872 | 0.080673758 | 8814 | tags=53% | list=25% | signal=40% | Ppp2r5b/Pygm/Ppp2cb/Ptpa/Gsk3b/Agl/Gys1/Phkb/Phkg2/Ppp2r3a/Ppp2r1b/Gbe1/Ugp2/Ppp2r2b/Ppp2r5e/Ppp2r5a/Ppp2r5d/Pygl |
| REACTOME_MRNA_SPLICING_MINOR_PATHWAY | REACTOME_MRNA_SPLICING_MINOR_PATHWAY | 48 | -0.375944414 | -1.539839814 | 0.01512322 | 0.102711872 | 0.080673758 | 6724 | tags=40% | list=19% | signal=32% | Snrpb/Polr2a/Ddx42/Polr2h/Zmat5/Sf3b4/Sf3b1/Polr2g/Snrnp200/Sf3b5/Gtf2f2/Polr2f/Snrpg/Sf3b3/Ncbp1/Eftud2/Ybx1/Polr2e/Snrnp40 |
| REACTOME_PURINE_RIBONUCLEOSIDE_MONOPHOSPHATE_BIOSYNTHESIS | REACTOME_PURINE_RIBONUCLEOSIDE_MONOPHOSPHATE_BIOSYNTHESIS | 11 | 0.647192792 | 1.707649356 | 0.015427537 | 0.103489967 | 0.081284903 | 3467 | tags=55% | list=10% | signal=49% | Impdh1/Adss/Gmps/Gart/Atic/Adssl1 |
| REACTOME_RHO_GTPASES_ACTIVATE_PKNS | REACTOME_RHO_GTPASES_ACTIVATE_PKNS | 22 | -0.499610254 | -1.674157878 | 0.015475877 | 0.103489967 | 0.081284903 | 5789 | tags=41% | list=17% | signal=34% | Pdpk1/Ppp1r12a/Ppp1cb/Rac1/Ywhab/Ywhah/Rhob/Ywhaz/Ywhae |
| REACTOME_AZATHIOPRINE_ADME | REACTOME_AZATHIOPRINE_ADME | 24 | 0.506056291 | 1.607960031 | 0.015328694 | 0.103489967 | 0.081284903 | 5096 | tags=42% | list=15% | signal=36% | Impdh1/Slc29a2/Abcc5/Tpmt/Gsta2/Gmps/Hprt/Vav2/Xdh/Nme1 |
| REACTOME_FORMATION_OF_INCISION_COMPLEX_IN_GG_NER | REACTOME_FORMATION_OF_INCISION_COMPLEX_IN_GG_NER | 43 | -0.39071463 | -1.565835253 | 0.015950611 | 0.105901332 | 0.08317888 | 5260 | tags=35% | list=15% | signal=30% | Pias3/Gtf2h2/Mnat1/Pias1/Cetn2/Ercc3/Ccnh/Uba52/Xpa/Gm11808/Cul4a/Gtf2h5/Ube2i/Parp1/Sumo2 |
| REACTOME_ADP_SIGNALLING_THROUGH_P2Y_PURINOCEPTOR_1 | REACTOME_ADP_SIGNALLING_THROUGH_P2Y_PURINOCEPTOR_1 | 24 | -0.451811113 | -1.558038438 | 0.016045534 | 0.105901332 | 0.08317888 | 3017 | tags=33% | list=9% | signal=30% | Mapk14/Gng7/Gnaq/Gna11/Gnb2/Src/Gng2/Gng10 |
| REACTOME_GPCR_LIGAND_BINDING | REACTOME_GPCR_LIGAND_BINDING | 377 | 0.260866508 | 1.305143066 | 0.01608011 | 0.105901332 | 0.08317888 | 6244 | tags=24% | list=18% | signal=20% | Hrh2/Adcyap1/Pth2r/Opn3/Hrh1/Chrm2/Grm4/Adra1b/Npsr1/Adrb1/Hrh3/Hcrtr2/Pth1r/Ucn/Grm8/Ntsr1/Plppr3/Tacr3/Calca/Crhr1/Tas1r1/Oprk1/Grm3/Apln/Htr7/App/Ptger3/Gnb1/Adra1a/Ptgfr/Gnb4/Ece1/Oprm1/Htr5a/Qrfpr/Sstr1/Galr1/Ccr10/Adra2a/Gpr17/Gng4/Oprl1/Nln/Hcrtr1/Galr2/Adm/Tac1/Kiss1r/Rxfp1/Gabbr2/Cxcl11/Gper1/Pomc/Sucnr1/Sstr2/Adrb3/Calcb/Cxcl10/Gng3/S1pr1/Rln3/Uts2r/Htr1b/Cckbr/Nmu/P2ry14/Cysltr2/Gnas/Trhr/Bdkrb2/Gpr4/Gpr37l1/Ramp3/Adcyap1r1/P2ry10/Tshb/Ntsr2/Pthlh/Taar1/Brs3/Trh/Aplnr/Opn4/Mc3r/Tac2/Mtnr1a/Htr2c/Opn1mw/Ptgdr/Tacr1/S1pr5/Rxfp2 |
| REACTOME_SELECTIVE_AUTOPHAGY | REACTOME_SELECTIVE_AUTOPHAGY | 64 | 0.386701131 | 1.540354605 | 0.016384522 | 0.106827086 | 0.083906001 | 6054 | tags=36% | list=17% | signal=30% | Dynll2/Tubb3/Tuba1b/Dync1li2/Map1lc3b/Map1lc3a/Atg12/Dync1h1/Mfn1/Pink1/Tuba1a/Ulk1/Tubb4a/Vdac1/Fundc1/Ubc/Tubb4b/Nbr1/Tuba1c/Arl13b/Mterf3/Tomm5/Cftr |
| REACTOME_SUMOYLATION_OF_RNA_BINDING_PROTEINS | REACTOME_SUMOYLATION_OF_RNA_BINDING_PROTEINS | 46 | -0.369237154 | -1.49312084 | 0.016363126 | 0.106827086 | 0.083906001 | 2371 | tags=20% | list=7% | signal=18% | Bmi1/Sec13/Seh1l/Phc2/Rnf2/Ube2i/Nup93/Rae1/Sumo2 |
| REACTOME_ORGANIC_CATION_ANION_ZWITTERION_TRANSPORT | REACTOME_ORGANIC_CATION_ANION_ZWITTERION_TRANSPORT | 12 | 0.613101602 | 1.652530972 | 0.016666171 | 0.10705757 | 0.084087032 | 8388 | tags=58% | list=24% | signal=44% | Slc22a3/Slc22a6/Slc22a2/Slc22a18/Slc22a8/Slc22a7/Slc22a4 |
| REACTOME_THROMBIN_SIGNALLING_THROUGH_PROTEINASE_ACTIVATED_RECEPTORS_PARS | REACTOME_THROMBIN_SIGNALLING_THROUGH_PROTEINASE_ACTIVATED_RECEPTORS_PARS | 31 | -0.436317465 | -1.624859715 | 0.016595909 | 0.10705757 | 0.084087032 | 1912 | tags=29% | list=5% | signal=27% | Gng7/Gnaq/Gna11/Gnb2/Src/Gng2/Mapk1/Arrb2/Gng10 |
| REACTOME_CELL_CELL_JUNCTION_ORGANIZATION | REACTOME_CELL_CELL_JUNCTION_ORGANIZATION | 40 | 0.434590588 | 1.575359994 | 0.016661914 | 0.10705757 | 0.084087032 | 4309 | tags=35% | list=12% | signal=31% | Cdh7/Cdh18/Ctnnd1/Cdh10/Cdh6/Sdk2/Cdh4/Nectin2/Sdk1/Jup/Cdh13/Pard6g/Ctnna1/Pard6a |
| REACTOME_HYALURONAN_UPTAKE_AND_DEGRADATION | REACTOME_HYALURONAN_UPTAKE_AND_DEGRADATION | 12 | 0.611900291 | 1.649293002 | 0.017182941 | 0.109300269 | 0.085848532 | 7834 | tags=58% | list=23% | signal=45% | Chp1/Hmmr/Hexa/Hyal1/Cd44/Lyve1/Gusb |
| REACTOME_RHOD_GTPASE_CYCLE | REACTOME_RHOD_GTPASE_CYCLE | 51 | -0.361528978 | -1.494128062 | 0.01711811 | 0.109300269 | 0.085848532 | 2375 | tags=25% | list=7% | signal=24% | Arhgap17/Arhgap12/Add3/Filip1/Pik3r2/Diaph2/Cpne8/Plxna1/Arhgap21/Capzb/Slc4a7/Diaph1/Arhgap39 |
| BIOCARTA_PS1_PATHWAY | BIOCARTA_PS1_PATHWAY | 14 | 0.593540081 | 1.660395366 | 0.017638783 | 0.110600701 | 0.086869941 | 10454 | tags=64% | list=30% | signal=45% | Gsk3b/Fzd1/Apc/Hnf1a/Rbpj/Adam17/Btrc/Wnt1/Dvl1 |
| WP_OSTEOCLAST_SIGNALING | WP_OSTEOCLAST_SIGNALING | 14 | 0.592944836 | 1.6587302 | 0.017896279 | 0.110600701 | 0.086869941 | 4201 | tags=43% | list=12% | signal=38% | Tnfrsf11b/Atp6v1g1/Tnfrsf11a/Itgb3/Ctsk/Spp1 |
| REACTOME_SHC1_EVENTS_IN_ERBB2_SIGNALING | REACTOME_SHC1_EVENTS_IN_ERBB2_SIGNALING | 14 | 0.592821546 | 1.658385304 | 0.017896279 | 0.110600701 | 0.086869941 | 3971 | tags=50% | list=11% | signal=44% | Nrg1/Hbegf/Egfr/Btc/Erbb4/Erbb3/Shc1 |
| REACTOME_BLOOD_GROUP_SYSTEMS_BIOSYNTHESIS | REACTOME_BLOOD_GROUP_SYSTEMS_BIOSYNTHESIS | 17 | 0.551685645 | 1.606077736 | 0.017713353 | 0.110600701 | 0.086869941 | 4651 | tags=47% | list=13% | signal=41% | Fut2/Fut9/St3gal6/St3gal4/B4galnt2/St3gal3/B3galt1/Fut1 |
| REACTOME_SIGNALING_BY_NTRK1_TRKA | REACTOME_SIGNALING_BY_NTRK1_TRKA | 63 | -0.34750459 | -1.533903661 | 0.017572166 | 0.110600701 | 0.086869941 | 3078 | tags=30% | list=9% | signal=28% | Vrk3/Mapk14/Ywhab/Sgk1/Clta/Mapk7/Ralgds/Ap2b1/Srf/Ap2a2/Chd4/Dusp4/Braf/Pik3r2/Pik3cb/Mapk1/Map2k1/Grb2/Dnal4 |
| REACTOME_MACROAUTOPHAGY | REACTOME_MACROAUTOPHAGY | 121 | 0.321290661 | 1.413092506 | 0.017815355 | 0.110600701 | 0.086869941 | 9151 | tags=41% | list=26% | signal=31% | Dynll2/Tsc1/Tubb3/Rragc/Tuba1b/Prkaa2/Dync1li2/Slc38a9/Map1lc3b/Map1lc3a/Atg4d/Atg12/Dync1h1/Mfn1/Atg9b/Atg13/Pink1/Tuba1a/Ulk1/Tubb4a/Vdac1/Rb1cc1/Fundc1/Mtmr14/Ubc/Tubb4b/Rptor/Nbr1/Tuba1c/Lamtor5/Atg4b/Arl13b/Mterf3/Tomm5/Cftr/Atg7/Csnk2b/Atg3/Atg4c/Chmp2a/Pik3c3/Tomm40/Pex5/Gabarapl2/Lamtor3/Chmp2b/Pik3r4/Csnk2a2/Atg5/Atg4a |
| REACTOME_DOWNREGULATION_OF_ERBB2_SIGNALING | REACTOME_DOWNREGULATION_OF_ERBB2_SIGNALING | 27 | 0.494757745 | 1.621517832 | 0.018640805 | 0.112414056 | 0.088294217 | 3470 | tags=37% | list=10% | signal=33% | Nrg1/Hbegf/Hsp90aa1/Egfr/Btc/Erbb4/Rnf41/Ubc/Usp8/Erbb3 |
| BIOCARTA_GPCR_PATHWAY | BIOCARTA_GPCR_PATHWAY | 28 | -0.44506101 | -1.609836332 | 0.01870694 | 0.112414056 | 0.088294217 | 1275 | tags=32% | list=4% | signal=31% | Adcy1/Gnaq/Calm3/Ppp3cb/Jun/Prkca/Elk1/Ppp3ca/Map2k1 |
| BIOCARTA_BAD_PATHWAY | BIOCARTA_BAD_PATHWAY | 23 | 0.502640505 | 1.587864084 | 0.018670433 | 0.112414056 | 0.088294217 | 2261 | tags=35% | list=6% | signal=33% | Bcl2/Pik3ca/Prkacb/Prkar2b/Kitl/Pik3r1/Prkar1b/Igf1 |
| REACTOME_SIGNALING_BY_MET | REACTOME_SIGNALING_BY_MET | 70 | 0.377679903 | 1.534327864 | 0.018563611 | 0.112414056 | 0.088294217 | 3971 | tags=29% | list=11% | signal=25% | Pik3ca/Col24a1/Hgs/Pik3r1/Itga3/Megf11/Crkl/Stam2/Gga3/Lrig1/Ptpn2/Lama4/Ranbp9/Kras/Ubc/Usp8/Stam/Sh3kbp1/Arf6/Shc1 |
| REACTOME_FORMATION_OF_RNA_POL_II_ELONGATION_COMPLEX | REACTOME_FORMATION_OF_RNA_POL_II_ELONGATION_COMPLEX | 55 | -0.3532312 | -1.502859022 | 0.018663591 | 0.112414056 | 0.088294217 | 8000 | tags=44% | list=23% | signal=34% | Aff4/Polr2d/Gtf2h3/Gtf2f1/Supt5/Supt4a/Polr2a/Polr2h/Tcea1/Gtf2h2/Mnat1/Ercc3/Ccnh/Polr2g/Mllt3/Gtf2f2/Elob/Cdk9/Polr2f/Gtf2h5/Ncbp1/Ssrp1/Polr2e/Supt6 |
| REACTOME_NRAGE_SIGNALS_DEATH_THROUGH_JNK | REACTOME_NRAGE_SIGNALS_DEATH_THROUGH_JNK | 52 | -0.359955747 | -1.502056646 | 0.018552806 | 0.112414056 | 0.088294217 | 3236 | tags=31% | list=9% | signal=28% | Rac1/Arhgef2/Arhgef7/Akap13/Arhgef6/Kalrn/Trio/Arhgef9/Arhgef26/Arhgef3/Net1/Arhgef17/Plekhg5/Abr/Fgd4/Arhgef25 |
| BIOCARTA_BARRESTIN_PATHWAY | BIOCARTA_BARRESTIN_PATHWAY | 11 | 0.636123754 | 1.678443167 | 0.018798187 | 0.1124442 | 0.088317894 | 4594 | tags=55% | list=13% | signal=47% | Kcna2/Arrb1/Ppara/Kcna3/Grk2/Gnas |
| WP_ERBB_SIGNALING_PATHWAY | WP_ERBB_SIGNALING_PATHWAY | 46 | -0.364388534 | -1.473513995 | 0.018929857 | 0.112714766 | 0.088530406 | 1673 | tags=24% | list=5% | signal=23% | Myc/Nrg2/Akt3/Src/Jun/Camk2a/Prkca/Mapk1/Elk1/Map2k1/Grb2 |
| REACTOME_SYNTHESIS_OF_IP2_IP_AND_INS_IN_THE_CYTOSOL | REACTOME_SYNTHESIS_OF_IP2_IP_AND_INS_IN_THE_CYTOSOL | 12 | 0.608377283 | 1.639797221 | 0.019250025 | 0.113768699 | 0.089358205 | 2099 | tags=42% | list=6% | signal=39% | Impa2/Inpp4a/Inpp1/Inpp5a/Isyna1 |
| REACTOME_MUSCLE_CONTRACTION | REACTOME_MUSCLE_CONTRACTION | 161 | 0.308759824 | 1.404197761 | 0.019281352 | 0.113768699 | 0.089358205 | 7063 | tags=33% | list=20% | signal=26% | Kcnj12/Kcnk3/Gucy1a1/Cacng7/Myl6b/Camk2d/Atp1b2/Camk2g/Atp1a2/Tpm2/Kcnk9/Mme/Nppc/Slc8a3/Ahcyl1/Pak1/Kcnd1/Kcnk12/Kcne4/Kcnip3/Kcnh2/Tnnc1/Atp2a2/Fxyd6/Tmod3/Kcnip1/Gucy1a2/Mybpc2/Cacna2d2/Atp2b2/Itga1/Tnnt1/Lmod1/Pln/Myl3/Atp2b4/Sorbs1/Cacng4/Fxyd7/Akap9/Tcap/Atp1b3/Kcne1l/Tnnt3/Myl4/Dmpk/Kcnk6/Myl9/Myh11/Itpr3/Mybpc1/Actc1/Itpr2 |
| BIOCARTA_FCER1_PATHWAY | BIOCARTA_FCER1_PATHWAY | 38 | -0.391065961 | -1.506438406 | 0.020048364 | 0.117761564 | 0.092494351 | 871 | tags=21% | list=3% | signal=21% | Calm3/Ppp3cb/Jun/Mapk1/Elk1/Ppp3ca/Map2k1/Grb2 |
| REACTOME_HEDGEHOG_OFF_STATE | REACTOME_HEDGEHOG_OFF_STATE | 108 | 0.341269157 | 1.478992156 | 0.020315729 | 0.118796906 | 0.093307547 | 5549 | tags=28% | list=16% | signal=23% | Tubb3/Ptch1/Prkacb/Adcy8/Prkar2b/Tuba1b/Psmc5/Gli1/Rpgrip1l/Ift172/Adcy5/Gsk3b/Prkar1b/Psmb10/Adcy6/Tuba1a/Dync2h1/Tubb4a/Ubc/Tubb4b/Numb/Psme2/Adcy3/Prkar1a/Tuba1c/Psme1/Itch/Psmd1/Psmd12/Rbx1 |
| REACTOME_SIGNALING_BY_EGFR | REACTOME_SIGNALING_BY_EGFR | 47 | 0.415553336 | 1.563607034 | 0.020568122 | 0.119735851 | 0.09404503 | 3971 | tags=32% | list=11% | signal=28% | Pik3ca/Hgs/Pik3r1/Stam2/Hbegf/Egfr/Csk/Lrig1/Btc/Kras/Ubc/Stam/Sh3kbp1/Pag1/Shc1 |
| WP_BURN_WOUND_HEALING | WP_BURN_WOUND_HEALING | 21 | 0.513115846 | 1.589417229 | 0.021180082 | 0.122750343 | 0.096412725 | 3535 | tags=29% | list=10% | signal=26% | Vegfa/Flii/Hbegf/Nos2/Il18/Gja1 |
| REACTOME_NEGATIVE_REGULATION_OF_FGFR4_SIGNALING | REACTOME_NEGATIVE_REGULATION_OF_FGFR4_SIGNALING | 30 | -0.427435802 | -1.575898712 | 0.02189864 | 0.126353213 | 0.099242554 | 2117 | tags=27% | list=6% | signal=25% | Uba52/Gm11808/Braf/Src/Mknk1/Mapk1/Fgf16/Grb2 |
| REACTOME_SUMOYLATION | REACTOME_SUMOYLATION | 164 | -0.258698496 | -1.334350142 | 0.022005943 | 0.126412997 | 0.099289511 | 4201 | tags=22% | list=12% | signal=19% | Cetn2/Nup85/Mta1/Tdg/Park7/Xrcc4/Sp3/Trim27/Uba2/L3mbtl2/Stag1/Ddx5/Dnmt3b/Tfap2c/Bmi1/Top2b/Sec13/Seh1l/Nsmce1/Phc2/Nrip1/Rad52/Thra/Ncoa1/Rnf2/Hdac1/Ube2i/Rara/Rwdd2b/Nup93/Nsmce3/Rae1/Parp1/Nr3c2/Sumo2/Mrtfa |
| REACTOME_PLASMA_LIPOPROTEIN_REMODELING | REACTOME_PLASMA_LIPOPROTEIN_REMODELING | 26 | -0.428470481 | -1.500052936 | 0.022127945 | 0.126556316 | 0.099402079 | 5056 | tags=23% | list=15% | signal=20% | Angptl3/Furin/Apoc2/Pcsk5/Lipc/Lpl |
| REACTOME_CELLULAR_RESPONSE_TO_CHEMICAL_STRESS | REACTOME_CELLULAR_RESPONSE_TO_CHEMICAL_STRESS | 156 | 0.304173872 | 1.389015618 | 0.022251395 | 0.126706634 | 0.099520145 | 10446 | tags=40% | list=30% | signal=28% | Tbl1x/Mul1/Cox7b/Map1lc3b/Ubxn7/Psmc5/Blvra/Cox11/Gsk3b/Ppara/Psmb10/Rxra/Bach1/Chd9/H13/Sod2/Cox6b1/Sco1/Surf1/Ero1a/Txn1/Cycs/Cox5a/Ubc/Ncoa2/Cox4i1/Psme2/Helz2/Nudt2/Trim21/Psme1/Prdx2/Ndufa4/Psmd1/Psmd12/Rbx1/Ep300/Cox7c/Srxn1/Skp2/Sod1/Nfe2l2/Gpx3/Cul1/Cox14/Psmc6/Gpx2/Sod3/Gm10053/Psmd4/Cox19/Gpx1/Psmd11/Sin3a/Psmf1/Psmc1/Psme2b/Psmb8/Cox5b/Gpx6/Taco1/Psmd7 |
| REACTOME_EPHA_MEDIATED_GROWTH_CONE_COLLAPSE | REACTOME_EPHA_MEDIATED_GROWTH_CONE_COLLAPSE | 18 | -0.513726865 | -1.643567577 | 0.02314481 | 0.129531466 | 0.101738873 | 1907 | tags=33% | list=5% | signal=32% | Efna3/Fyn/Src/Epha4/Epha6/Epha7 |
| REACTOME_ABC_TRANSPORTERS_IN_LIPID_HOMEOSTASIS | REACTOME_ABC_TRANSPORTERS_IN_LIPID_HOMEOSTASIS | 17 | 0.541775623 | 1.577227493 | 0.023065507 | 0.129531466 | 0.101738873 | 11188 | tags=76% | list=32% | signal=52% | Abca5/Abca3/Abcd2/Abca7/Abca6/Abca9/Abcg4/Abcd1/Abca12/Abca2/Pex19/Abcd3/Abcg1 |
| REACTOME_BIOSYNTHESIS_OF_THE_N_GLYCAN_PRECURSOR_DOLICHOL_LIPID_LINKED_OLIGOSACCHARIDE_LLO_AND_TRANSFER_TO_A_NASCENT_PROTEIN | REACTOME_BIOSYNTHESIS_OF_THE_N_GLYCAN_PRECURSOR_DOLICHOL_LIPID_LINKED_OLIGOSACCHARIDE_LLO_AND_TRANSFER_TO_A_NASCENT_PROTEIN | 72 | 0.369567532 | 1.505548229 | 0.022907991 | 0.129531466 | 0.101738873 | 6011 | tags=33% | list=17% | signal=28% | Uap1/Gfpt1/St6gal2/St3gal6/St6gal1/St3gal4/Neu3/Alg12/Nans/Dolpp1/Nus1/Dolk/Glb1/St3gal3/Gnpnat1/Dpm3/St8sia4/Mvd/Nanp/Dhdds/Gne/Cmas/Gfpt2/Neu4 |
| REACTOME_RAC3_GTPASE_CYCLE | REACTOME_RAC3_GTPASE_CYCLE | 91 | -0.293601393 | -1.375872498 | 0.022951105 | 0.129531466 | 0.101738873 | 2598 | tags=20% | list=7% | signal=18% | Brk1/Arhgap17/Trio/Pik3r2/Dock10/Arhgap15/Git1/Baiap2/Slitrk3/Slitrk5/Abl2/Nckap1/Cyfip1/Wasf1/Arhgap21/Abi1/Abr/Arhgap39 |
| REACTOME_SYNTHESIS_OF_GLYCOSYLPHOSPHATIDYLINOSITOL_GPI | REACTOME_SYNTHESIS_OF_GLYCOSYLPHOSPHATIDYLINOSITOL_GPI | 17 | 0.540005314 | 1.572073735 | 0.023320372 | 0.129956263 | 0.102072525 | 9583 | tags=59% | list=28% | signal=43% | Pigc/Pigf/Pigv/Pigm/Pigz/Pigh/Pign/Pigq/Pigx/Pigg |
| REACTOME_DNA_DAMAGE_RECOGNITION_IN_GG_NER | REACTOME_DNA_DAMAGE_RECOGNITION_IN_GG_NER | 39 | -0.389402632 | -1.509549236 | 0.023480208 | 0.130290176 | 0.102334793 | 4201 | tags=33% | list=12% | signal=29% | Ino80c/Cetn2/Cops8/Gps1/Ruvbl1/Nfrkb/Uba52/Gm11808/Cul4a/Actg1/Mcrs1/Yy1/Parp1 |
| REACTOME_SODIUM_CALCIUM_EXCHANGERS | REACTOME_SODIUM_CALCIUM_EXCHANGERS | 13 | -0.582310599 | -1.693586368 | 0.023631646 | 0.130574856 | 0.102558391 | 5968 | tags=54% | list=17% | signal=45% | Slc24a3/Slc24a4/Slc8a1/Calm1/Slc8a2/Calm2/Calm3 |
| BIOCARTA_LONGEVITY_PATHWAY | BIOCARTA_LONGEVITY_PATHWAY | 15 | 0.594185483 | 1.685262254 | 0.024417747 | 0.134349125 | 0.105522844 | 8688 | tags=60% | list=25% | signal=45% | Pik3ca/Pik3r1/Sod2/Igf1/Shc1/Foxo3/Sod1/Sod3/Ghr |
| REACTOME_BILE_ACID_AND_BILE_SALT_METABOLISM | REACTOME_BILE_ACID_AND_BILE_SALT_METABOLISM | 45 | 0.407251462 | 1.51513024 | 0.024980084 | 0.136865668 | 0.107499431 | 4877 | tags=31% | list=14% | signal=27% | Osbpl3/Acot8/Osbpl1a/Osbpl2/Rxra/Ptgis/Akr1c14/Cyp46a1/Osbpl9/Ncoa2/Slc27a2/Cyp39a1/Hsd17b4/Akr1cl |
| REACTOME_RHOF_GTPASE_CYCLE | REACTOME_RHOF_GTPASE_CYCLE | 40 | -0.394609194 | -1.543652777 | 0.025558051 | 0.138171962 | 0.108525444 | 2197 | tags=30% | list=6% | signal=28% | Actn1/Arhgap12/Mtmr1/Add3/Actg1/Pik3r2/Diaph2/Arhgap21/Capzb/Slc4a7/Diaph1/Arhgap39 |
| REACTOME_RESOLUTION_OF_D_LOOP_STRUCTURES | REACTOME_RESOLUTION_OF_D_LOOP_STRUCTURES | 32 | 0.449380274 | 1.53123518 | 0.025616519 | 0.138171962 | 0.108525444 | 9372 | tags=56% | list=27% | signal=41% | Rad51d/Nbn/Rad51c/Xrcc2/Kat5/Brip1/Dna2/Rbbp8/Rad51/Slx4/Wrn/Brca2/Brca1/Eme1/Top3a/Mre11a/Rmi1/Blm |
| REACTOME_HSP90_CHAPERONE_CYCLE_FOR_STEROID_HORMONE_RECEPTORS_SHR_IN_THE_PRESENCE_OF_LIGAND | REACTOME_HSP90_CHAPERONE_CYCLE_FOR_STEROID_HORMONE_RECEPTORS_SHR_IN_THE_PRESENCE_OF_LIGAND | 51 | 0.385422129 | 1.479173812 | 0.025547719 | 0.138171962 | 0.108525444 | 3353 | tags=31% | list=10% | signal=28% | Dynll2/Dnajb1/Tubb3/Tuba1b/Dync1li2/Nr3c1/Hsp90aa1/Dync1h1/Fkbp4/Actr1a/Stip1/Tuba1a/Tubb4a/Pgr/Tubb4b/Dnaja1 |
| REACTOME_ER_TO_GOLGI_ANTEROGRADE_TRANSPORT | REACTOME_ER_TO_GOLGI_ANTEROGRADE_TRANSPORT | 147 | -0.259385472 | -1.322263004 | 0.025642343 | 0.138171962 | 0.108525444 | 5215 | tags=25% | list=15% | signal=21% | Sptan1/Tmed9/Kdelr1/Tubb1/Sec23a/Copz1/Lman2/Tubb2a/Dctn6/Arf4/Csnk1d/Cog2/Arfgap1/Ppp6c/Rab1b/Dctn2/Trappc1/Sec23ip/Sec13/Nsf/Sptbn2/Bet1l/Napa/Cog5/Lman2l/Arf3/Tmem115/Dynll1/Sptb/Sec24d/Arf5/Tbc1d20/Capzb/Capza2/Arf1/Gria1/Cnih2 |
| BIOCARTA_HDAC_PATHWAY | BIOCARTA_HDAC_PATHWAY | 24 | -0.427783814 | -1.475182012 | 0.026143196 | 0.140291063 | 0.110189864 | 3017 | tags=33% | list=9% | signal=30% | Mapk14/Mapk7/Ywhah/Myod1/Calm3/Ppp3cb/Camk2a/Ppp3ca |
| REACTOME_ACTIVATION_OF_THE_TFAP2_AP_2_FAMILY_OF_TRANSCRIPTION_FACTORS | REACTOME_ACTIVATION_OF_THE_TFAP2_AP_2_FAMILY_OF_TRANSCRIPTION_FACTORS | 11 | 0.619973259 | 1.635829307 | 0.026317359 | 0.140646872 | 0.11046933 | 7654 | tags=73% | list=22% | signal=57% | Wwox/Tfap2b/Cited4/Cited2/Cited1/Tfap2d/Ep300/Tfap2a |
| REACTOME_DUAL_INCISION_IN_TC_NER | REACTOME_DUAL_INCISION_IN_TC_NER | 64 | -0.328852008 | -1.46190361 | 0.026621451 | 0.141691316 | 0.111289676 | 6274 | tags=36% | list=18% | signal=30% | Polr2a/Ercc6/Polr2h/Tcea1/Gtf2h2/Mnat1/Pole2/Zfp830/Pole4/Rfc3/Ercc3/Ccnh/Polr2g/Uba52/Xpa/Pole/Gm11808/Polr2f/Cul4a/Xab2/Rfc5/Gtf2h5/Polr2e |
| REACTOME_PROTEIN_LOCALIZATION | REACTOME_PROTEIN_LOCALIZATION | 103 | 0.326760974 | 1.411932767 | 0.0267883 | 0.141999768 | 0.111531945 | 9055 | tags=41% | list=26% | signal=30% | Acot8/Pex7/Pitrm1/Cyb5a/Pex26/Aldh3a2/Abcd2/Pxmp4/Nos2/Ldhd/App/Acox3/Pex13/Ide/Decr2/Fxn/Ubc/Phyh/Crat/Hacl1/Slc27a2/Atp5b/Fis1/Hsd17b4/Acox1/Dao/Acbd5/Amacr/Pex16/Ndufb8/Abcd1/Hspd1/Usp9x/Pex12/Pex5/Pex14/Hmgcl/Gnpat/Idh1/Pex1/Gstk1/Sgta |
| REACTOME_CA2_PATHWAY | REACTOME_CA2_PATHWAY | 46 | -0.35322625 | -1.428375963 | 0.027299161 | 0.144121885 | 0.113198736 | 1912 | tags=22% | list=5% | signal=21% | Gng7/Gnb2/Calm2/Calm3/Ppp3cb/Camk2a/Gng2/Ppp3ca/Ppp3r1/Gng10 |
| REACTOME_SUMOYLATION_OF_TRANSCRIPTION_COFACTORS | REACTOME_SUMOYLATION_OF_TRANSCRIPTION_COFACTORS | 38 | -0.377965688 | -1.4559744 | 0.027896486 | 0.146681523 | 0.115209172 | 4433 | tags=39% | list=13% | signal=34% | Sumo3/Zfp131/Mbd1/Pias3/Pias1/Park7/Ddx5/Bmi1/Phc2/Nrip1/Ncoa1/Rnf2/Ube2i/Sumo2/Mrtfa |
| REACTOME_TELOMERE_C_STRAND_LAGGING_STRAND_SYNTHESIS | REACTOME_TELOMERE_C_STRAND_LAGGING_STRAND_SYNTHESIS | 31 | 0.456421816 | 1.537946877 | 0.028235323 | 0.147866912 | 0.116140221 | 9947 | tags=58% | list=29% | signal=41% | Lig1/Pot1a/Prim1/Chtf18/Prim2/Dna2/Dscc1/Pold1/Terf1/Rfc4/Pold2/Wrn/Rfc2/Ctc1/Rfc1/Blm/Rpa3/Acd |
| REACTOME_SIGNALING_BY_TGF_BETA_RECEPTOR_COMPLEX | REACTOME_SIGNALING_BY_TGF_BETA_RECEPTOR_COMPLEX | 74 | -0.321675638 | -1.458585326 | 0.028485753 | 0.148581687 | 0.116701632 | 4255 | tags=28% | list=12% | signal=25% | Furin/Smad4/Itgb6/Atp1b4/Fbn1/Uba52/Cdk9/Gm11808/Bambi/Ski/Ncor2/Tfdp1/Hdac1/Smad3/Skil/Mapk1/Nedd4l/Tgfb2/Itga8/Parp1/Fkbp1a |
| REACTOME_CHONDROITIN_SULFATE_BIOSYNTHESIS | REACTOME_CHONDROITIN_SULFATE_BIOSYNTHESIS | 19 | -0.50045961 | -1.621468373 | 0.029059099 | 0.148600256 | 0.116716216 | 1633 | tags=26% | list=5% | signal=25% | Chst7/Chst11/Chst9/Chpf/Chst15 |
| REACTOME_GAB1_SIGNALOSOME | REACTOME_GAB1_SIGNALOSOME | 17 | 0.53084108 | 1.545394644 | 0.028942475 | 0.148600256 | 0.116716216 | 3630 | tags=41% | list=10% | signal=37% | Pik3ca/Pik3r1/Hbegf/Egfr/Csk/Btc/Pag1 |
| REACTOME_FATTY_ACYL_COA_BIOSYNTHESIS | REACTOME_FATTY_ACYL_COA_BIOSYNTHESIS | 32 | 0.445756573 | 1.518887646 | 0.028968121 | 0.148600256 | 0.116716216 | 7127 | tags=47% | list=20% | signal=37% | Tecr/Acsl6/Acly/Acaca/Acsbg1/Elovl6/Acsf3/Slc27a2/Scd1/Ppt1/Hacd3/Hacd1/Acsl3/Fasn/Tecrl |
| WP_G_PROTEIN_SIGNALING_PATHWAYS | WP_G_PROTEIN_SIGNALING_PATHWAYS | 88 | 0.341646669 | 1.437288901 | 0.029036898 | 0.148600256 | 0.116716216 | 5952 | tags=36% | list=17% | signal=30% | Pde4d/Akap12/Prkacb/Adcy8/Prkar2b/Pde4b/Gnal/Adcy5/Akap10/Prkar1b/Gnb1/Nras/Adcy6/Gna13/Akap6/Gng4/Akap4/Kras/Adcy3/Gng3/Prkar1a/Gnai2/Gnas/Akap9/Pde1c/Pde1b/Plcb3/Gna12/Gnai1/Prkcz/Pde7b/Pde4a |
| WP_MECHANISMS_ASSOCIATED_WITH_PLURIPOTENCY | WP_MECHANISMS_ASSOCIATED_WITH_PLURIPOTENCY | 283 | -0.223055467 | -1.221225932 | 0.028926922 | 0.148600256 | 0.116716216 | 3352 | tags=17% | list=10% | signal=16% | Nobox/Thap11/Sp3/Twist1/Ctcf/Dazl/Sf1/Sgk1/Relb/Rtn4r/Dnmt3b/Tfap2c/Mef2d/H3f3a/Ehmt1/Hdac2/Myod1/Chd4/Myc/Ep400/Atrx/Hcfc1/Rcor2/Gatad2b/Kdm4c/Ccnd1/Ncoa1/Fgf5/Ezh1/Wnt3a/Rnf2/Dnmt3l/Hdac1/Yy1/Ube2i/Trim28/Smad3/Ssrp1/Mapk1/Rbbp7/Prkcg/Nedd4l/Acvr1/Mta2/Map2k1/Lefty1/Fgfr1/Grb2/Parp1 |
| REACTOME_SIGNALING_BY_WNT | REACTOME_SIGNALING_BY_WNT | 234 | -0.227673069 | -1.215615925 | 0.029242757 | 0.148955293 | 0.116995076 | 3293 | tags=18% | list=9% | signal=16% | Klhl12/Rac1/Plcb2/Clta/Ryk/Psmd6/Wnt8b/Ap2b1/Psmb5/Uba52/Ap2a2/Vps29/Gng7/Zranb1/Gm11808/Wnt2/Ror1/Psma4/Ywhaz/Gnb2/Tnks2/Calm2/Wnt3a/Pygo1/Calm3/Hdac1/Ppp3cb/Rbbp5/Csnk1a1/Camk2a/Pip5k1b/Gng2/Tle1/Frat2/Pfn1/Ppp3ca/Prkcg/Frat1/Ppp3r1/Arrb2/Gng10 |
| REACTOME_M_PHASE | REACTOME_M_PHASE | 380 | 0.254589268 | 1.273853374 | 0.029726516 | 0.15083026 | 0.118467746 | 6401 | tags=25% | list=18% | signal=21% | Dynll2/Clasp1/Tubb3/Ndel1/Ppp2r5b/Csnk1e/Rad21/Prkar2b/Zwint/Tubgcp5/Tuba1b/Dync1li2/Cep290/Psmc5/Rcc1/Cenpi/Tubg1/Clasp2/Ppp2cb/Rab1a/Haus8/Alms1/Hsp90aa1/Dync1h1/Cenpo/Psmb10/Cenps/Anapc15/Rangap1/Lpin1/Hdac8/Cep76/H2bc7/Nudc/Actr1a/Pmf1/Tuba1a/Plk4/Cep43/Anapc11/Mis12/Zw10/Anapc2/Cnep1r1/Cenpq/Tubb4a/Haus1/Cenpc1/Tubgcp6/Ubc/Cenpt/Nup160/H2bc22/Cep41/Tubb4b/Cenpn/Tubb5/Anapc7/Gorasp1/Kif23/Mad2l1/Lmna/Psme2/Ckap5/Ppp2r1b/Tuba1c/Psme1/Cenpl/Ccp110/H2bc21/Nedd1/Akap9/Pafah1b1/Cc2d1b/Psmd1/Ccnb1/Anapc5/H4c6/Psmd12/H2az2/Tubgcp4/Blzf1/H2ac10/Ndc80/Nup210/Nup205/Pttg1/Mapre1/Incenp/Ube2e1/Vps4a/Cenpf/Haus7/Nup98/Nup188 |
| WP_ESTROGEN_METABOLISM | WP_ESTROGEN_METABOLISM | 10 | -0.62516828 | -1.657261557 | 0.030024394 | 0.150891902 | 0.118516162 | 10328 | tags=70% | list=30% | signal=49% | Nqo1/Sult1a1/Cyp1b1/Ugt1a6a/Cyp1a2/Cyp1a1/Gstm1 |
| REACTOME_FORMATION_OF_THE_EARLY_ELONGATION_COMPLEX | REACTOME_FORMATION_OF_THE_EARLY_ELONGATION_COMPLEX | 32 | -0.405763201 | -1.529710901 | 0.030201523 | 0.150891902 | 0.118516162 | 8423 | tags=56% | list=24% | signal=43% | Ctdp1/Polr2d/Gtf2h3/Gtf2f1/Supt5/Supt4a/Polr2a/Polr2h/Gtf2h2/Mnat1/Ercc3/Ccnh/Polr2g/Gtf2f2/Polr2f/Gtf2h5/Ncbp1/Polr2e |
| REACTOME_TOLL_LIKE_RECEPTOR_4_TLR4_CASCADE | REACTOME_TOLL_LIKE_RECEPTOR_4_TLR4_CASCADE | 117 | 0.319247795 | 1.401472994 | 0.030194226 | 0.150891902 | 0.118516162 | 7416 | tags=34% | list=21% | signal=27% | Mapk9/Dnm3/Nkiras1/Ptpn4/Mapk8/Birc2/Ppp2cb/Rps6ka3/Mapk11/Peli3/App/Nfkbib/Sftpa1/S100b/Tifa/Ubc/N4bp1/Nod2/Ikbkb/Atf2/Fos/Bpi/Usp18/Ppp2r1b/Rps6ka5/Traf2/Irf7/Creb1/Lrrc14/Tirap/Rela/Usp14/Irf3/Ikbkg/Map2k3/Map2k7/Mapkapk2/Cul1/Ripk1/Nlrc5 |
| REACTOME_REGULATION_OF_MRNA_STABILITY_BY_PROTEINS_THAT_BIND_AU_RICH_ELEMENTS | REACTOME_REGULATION_OF_MRNA_STABILITY_BY_PROTEINS_THAT_BIND_AU_RICH_ELEMENTS | 85 | -0.296704635 | -1.382108675 | 0.030155353 | 0.150891902 | 0.118516162 | 3800 | tags=21% | list=11% | signal=19% | Psma7/Hspa1b/Ywhab/Exosc1/Dis3/Psmd6/Psmb5/Uba52/Exosc4/Gm11808/Khsrp/Parn/Elavl1/Psma4/Ywhaz/Xrn1/Anp32a/Pabpc1 |
| REACTOME_TRANSCRIPTION_COUPLED_NUCLEOTIDE_EXCISION_REPAIR_TC_NER | REACTOME_TRANSCRIPTION_COUPLED_NUCLEOTIDE_EXCISION_REPAIR_TC_NER | 76 | -0.308864716 | -1.403879656 | 0.030449064 | 0.151548012 | 0.119031495 | 6358 | tags=37% | list=18% | signal=30% | Xrcc1/Polr2a/Lig3/Cops6/Ercc6/Polr2h/Tcea1/Gtf2h2/Mnat1/Pole2/Zfp830/Cops8/Pole4/Rfc3/Gps1/Ercc3/Ccnh/Polr2g/Uba52/Xpa/Pole/Gm11808/Polr2f/Cul4a/Xab2/Rfc5/Gtf2h5/Polr2e |
| REACTOME_SEMAPHORIN_INTERACTIONS | REACTOME_SEMAPHORIN_INTERACTIONS | 51 | 0.377481455 | 1.448699078 | 0.031425816 | 0.15581469 | 0.122382704 | 3179 | tags=29% | list=9% | signal=27% | Limk1/Rnd1/Hsp90aa1/Gsk3b/Arhgap35/Sema4a/Pak1/Dpysl2/Cdk5/Plxnc1/Dpysl5/Plxna3/Farp2/Cd72/Dpysl3 |
| REACTOME_SUMOYLATION_OF_SUMOYLATION_PROTEINS | REACTOME_SUMOYLATION_OF_SUMOYLATION_PROTEINS | 34 | -0.384905294 | -1.47473487 | 0.03188684 | 0.157501665 | 0.123707718 | 2010 | tags=18% | list=6% | signal=17% | Sec13/Seh1l/Ube2i/Nup93/Rae1/Sumo2 |
| BIOCARTA_NOS1_PATHWAY | BIOCARTA_NOS1_PATHWAY | 19 | -0.493478037 | -1.598848369 | 0.032058708 | 0.15775304 | 0.123905157 | 1484 | tags=53% | list=4% | signal=50% | Calm1/Nos1/Grin2b/Grin1/Dlg4/Calm3/Ppp3cb/Prkca/Ppp3ca/Grin2a |
| REACTOME_ERBB2_REGULATES_CELL_MOTILITY | REACTOME_ERBB2_REGULATES_CELL_MOTILITY | 13 | 0.58151123 | 1.587273241 | 0.032864099 | 0.161108215 | 0.126540437 | 3470 | tags=46% | list=10% | signal=42% | Nrg1/Hbegf/Egfr/Btc/Erbb4/Erbb3 |
| REACTOME_CARNITINE_METABOLISM | REACTOME_CARNITINE_METABOLISM | 14 | 0.563875469 | 1.577410264 | 0.033381633 | 0.161220926 | 0.126628964 | 1779 | tags=36% | list=5% | signal=34% | Ppard/Acaca/Prkaa2/Mid1ip1/Rxra |
| REACTOME_NUCLEOTIDE_CATABOLISM | REACTOME_NUCLEOTIDE_CATABOLISM | 36 | 0.431787937 | 1.514204829 | 0.033224431 | 0.161220926 | 0.126628964 | 6094 | tags=36% | list=18% | signal=30% | Entpd3/Entpd5/Entpd2/Nudt18/Adprm/Nudt5/Nt5c3/Nudt1/Dpys/Upb1/Xdh/Samhd1/Nt5c |
| REACTOME_SIGNALING_BY_FGFR | REACTOME_SIGNALING_BY_FGFR | 73 | -0.311896671 | -1.411395826 | 0.033323827 | 0.161220926 | 0.126628964 | 4503 | tags=32% | list=13% | signal=27% | Kl/Ppp2r1a/Hnrnpa1/Fgfrl1/Spred2/Flrt3/Polr2g/Gtf2f2/Uba52/Gm11808/Polr2f/Fgf10/Braf/Src/Fgf5/Ncbp1/Mknk1/Galnt3/Mapk1/Polr2e/Fgf16/Fgfr1/Grb2 |
| REACTOME_SIGNALING_BY_RECEPTOR_TYROSINE_KINASES | REACTOME_SIGNALING_BY_RECEPTOR_TYROSINE_KINASES | 399 | 0.251065014 | 1.261512957 | 0.033096927 | 0.161220926 | 0.126628964 | 5040 | tags=24% | list=14% | signal=21% | Pik3r3/Nrg1/Pik3ca/Shc3/Flrt1/Elmo1/Prkacb/Fgf9/Atp6v1g1/Col24a1/Hgs/Ctnnd1/Kitl/Wwox/Fgf22/Vegfa/Pik3r1/Stat5b/Atp6v0a2/Itga3/Wwp1/Grb10/Megf11/Crkl/Polr2c/Thbs2/Ppp2cb/Spred1/Stam2/Gga3/Vegfb/Hbegf/Hsp90aa1/Egfr/Csk/Frs3/Lrig1/Rps6ka3/Mapk11/Col9a2/Sh2b2/Btc/Sphk1/Pak1/Cltc/Erbb4/Stat6/Hspb1/Ptprf/Ptpn2/Ncbp2/Igf1/Fgf3/Lama4/Atp6ap1/Itgav/Alk/Ranbp9/Ntrk2/Ptn/Jup/Dock1/Ide/Fgfr3/Itgb3/Rnf41/Kras/Ubc/Jak2/Usp8/Stam/Sh3kbp1/Grb7/Erbb3/Pag1/Yes1/Vav2/Arf6/Shc1/Ppp2r1b/Ctnna1/Spp1/Rictor/Wasf3/Rps6ka5/Col6a2/Psenen/Itch/Creb1/Fgf1/Fgf23/Plcg1/Rab4a/Flt1/Stub1 |
| REACTOME_RHOA_GTPASE_CYCLE | REACTOME_RHOA_GTPASE_CYCLE | 141 | 0.294588961 | 1.327778708 | 0.033921303 | 0.163222799 | 0.128201311 | 4266 | tags=25% | list=12% | signal=22% | Mcf2/Dlc1/Vapb/Pcdh7/Arhgef15/Racgap1/Pik3r1/Maco1/Arhgap32/Arhgap35/Arhgap11a/Arhgef10l/Ktn1/Farp1/Arhgap31/Arhgap22/Arhgap26/Arhgap42/Atp6ap1/Bcap31/Arhgap5/Jup/Gmip/Srgap1/Plekhg6/Arap2/Arhgap18/Vav2/Pkn2/Arhgef18/Snap23/Stbd1/Arhgap6/Rhpn2/Stom |
| WP_WNT_SIGNALING_PATHWAY_AND_PLURIPOTENCY | WP_WNT_SIGNALING_PATHWAY_AND_PLURIPOTENCY | 97 | 0.325613153 | 1.392604497 | 0.034285748 | 0.164369907 | 0.129102292 | 2740 | tags=22% | list=8% | signal=20% | Ppard/Mapk9/Dvl3/Wnt2b/Csnk1e/Ctnnd1/Racgap1/Ppp2cb/Ptpa/Gsk3b/Wnt4/Wnt6/Ldlr/Fzd1/Nkd1/Sox2/Apc/Fzd2/Lef1/Hnf1a/Nfya |
| REACTOME_SUMOYLATION_OF_DNA_DAMAGE_RESPONSE_AND_REPAIR_PROTEINS | REACTOME_SUMOYLATION_OF_DNA_DAMAGE_RESPONSE_AND_REPAIR_PROTEINS | 74 | -0.316022885 | -1.432953842 | 0.034507011 | 0.164824695 | 0.1294595 | 4433 | tags=26% | list=13% | signal=22% | Pias1/Cetn2/Nup85/Tdg/Xrcc4/Stag1/Bmi1/Sec13/Seh1l/Nsmce1/Phc2/Rad52/Rnf2/Ube2i/Nup93/Nsmce3/Rae1/Parp1/Sumo2 |
| WP_GPCRS_OTHER | WP_GPCRS_OTHER | 61 | 0.36542382 | 1.440416482 | 0.035469821 | 0.16880528 | 0.132586 | 7171 | tags=36% | list=21% | signal=29% | Pth2r/Trhr2/Adrb1/Gpr165/Tacr3/Tas1r1/Oprk1/Fzd1/Gpr88/Fzd2/Oprm1/Ccr10/Oprl1/Gpr162/S1pr1/Gpr37l1/Fzd5/S1pr5/Irx6/Fzd9/Gabbr1/Adgrg1 |
| REACTOME_SUMOYLATION_OF_TRANSCRIPTION_FACTORS | REACTOME_SUMOYLATION_OF_TRANSCRIPTION_FACTORS | 15 | -0.515215634 | -1.575983777 | 0.03589862 | 0.169022198 | 0.132756376 | 5260 | tags=53% | list=15% | signal=45% | Sumo3/Pias3/Pias1/Mta1/Sp3/Tfap2c/Ube2i/Sumo2 |
| REACTOME_GLYCOSPHINGOLIPID_METABOLISM | REACTOME_GLYCOSPHINGOLIPID_METABOLISM | 39 | 0.42151867 | 1.512262124 | 0.035830193 | 0.169022198 | 0.132756376 | 7787 | tags=49% | list=22% | signal=38% | Cerk/Asah2/Arsa/Asah1/Cptp/Esyt1/Neu3/Smpd1/Arsk/B3galnt1/Glb1/Hexa/Ugcg/Gla/Neu4/Gba/Ugt8a/Sumf1/Neu2 |
| WP_INSULIN_SIGNALING | WP_INSULIN_SIGNALING | 158 | 0.2895389 | 1.322379591 | 0.035904255 | 0.169022198 | 0.132756376 | 9418 | tags=43% | list=27% | signal=32% | Mapk6/Pik3r3/Mapk9/Pik3ca/Shc3/Tsc1/Sos2/Map3k9/Stxbp1/Map3k5/Pik3cd/Prkaa2/Pik3r1/Mapk8/Xbp1/Rrad/Grb10/Map3k14/Stx4a/Gsk3b/Rps6ka3/Mapk11/Inpp4a/Sh2b2/Pfkm/Ptprf/Kif5b/Rhoq/Ikbkb/Gys1/Map4k2/Fos/Arf6/Shc1/Snap23/Sorbs1/Rps6ka5/Eif4e/Myo1c/Rab4a/Foxo3/Prkcz/Map2k3/Rps6ka6/Sgk3/Pik3c2g/Inppl1/Tbc1d4/Pten/Stxbp4/Map2k7/Pik3c3/Slc2a4/Sos1/Map3k1/Prkch/Kif3a/Mapk12/Socs3/Gab1/Map3k13/Sgk2/Pik3r4/Egr1/Socs1/Map4k4/Mtor/Mapk13 |
| REACTOME_RECEPTOR_TYPE_TYROSINE_PROTEIN_PHOSPHATASES | REACTOME_RECEPTOR_TYPE_TYROSINE_PROTEIN_PHOSPHATASES | 20 | -0.476363249 | -1.553438152 | 0.036642354 | 0.170916626 | 0.134244331 | 3034 | tags=35% | list=9% | signal=32% | Il1rap/Slitrk2/Slitrk3/Slitrk5/Ppfia4/Ntrk3/Ppfia2 |
| REACTOME_EPH_EPHRIN_MEDIATED_REPULSION_OF_CELLS | REACTOME_EPH_EPHRIN_MEDIATED_REPULSION_OF_CELLS | 34 | -0.378542813 | -1.450357518 | 0.036699889 | 0.170916626 | 0.134244331 | 3236 | tags=24% | list=9% | signal=21% | Rac1/Efna3/Fyn/Ephb2/Src/Epha4/Epha6/Epha7 |
| REACTOME_DOWNSTREAM_SIGNALING_EVENTS_OF_B_CELL_RECEPTOR_BCR | REACTOME_DOWNSTREAM_SIGNALING_EVENTS_OF_B_CELL_RECEPTOR_BCR | 79 | -0.295756085 | -1.365044485 | 0.036565416 | 0.170916626 | 0.134244331 | 5598 | tags=25% | list=16% | signal=21% | Psmb3/Hras/Psma5/Calm1/Psmb2/Nfkbie/Psma7/Psmd6/Psmb5/Uba52/Gm11808/Fbxw11/Psma4/Calm2/Rasgrp1/Calm3/Ppp3cb/Ppp3ca/Ppp3r1/Fkbp1a |
| REACTOME_TNF_RECEPTOR_SUPERFAMILY_TNFSF_MEMBERS_MEDIATING_NON_CANONICAL_NF_KB_PATHWAY | REACTOME_TNF_RECEPTOR_SUPERFAMILY_TNFSF_MEMBERS_MEDIATING_NON_CANONICAL_NF_KB_PATHWAY | 18 | 0.519523938 | 1.551016673 | 0.037460882 | 0.173839823 | 0.13654032 | 4516 | tags=33% | list=13% | signal=29% | Tnfrsf11a/Birc2/Map3k14/Xiap/Tnfrsf13c/Traf2 |
| WP_OSTEOBLAST_SIGNALING | WP_OSTEOBLAST_SIGNALING | 10 | 0.624205984 | 1.602416089 | 0.037985059 | 0.175647222 | 0.137959918 | 9428 | tags=70% | list=27% | signal=51% | Tnfrsf11b/Pth1r/Fgf23/Pdgfrb/Tnfsf11/Pdgfra/Col1a1 |
| REACTOME_PEPTIDE_HORMONE_BIOSYNTHESIS | REACTOME_PEPTIDE_HORMONE_BIOSYNTHESIS | 10 | 0.623879404 | 1.601577716 | 0.03851631 | 0.176641782 | 0.138741083 | 5168 | tags=60% | list=15% | signal=51% | Pcsk1/Inhbb/Inhbe/Pomc/Inha/Tshb |
| REACTOME_ACTIVATION_OF_BAD_AND_TRANSLOCATION_TO_MITOCHONDRIA | REACTOME_ACTIVATION_OF_BAD_AND_TRANSLOCATION_TO_MITOCHONDRIA | 12 | -0.551302872 | -1.55568622 | 0.038741986 | 0.176641782 | 0.138741083 | 2922 | tags=42% | list=8% | signal=38% | Ywhab/Ywhah/Ywhaz/Ywhae/Ppp3r1 |
| REACTOME_TRANSPORT_TO_THE_GOLGI_AND_SUBSEQUENT_MODIFICATION | REACTOME_TRANSPORT_TO_THE_GOLGI_AND_SUBSEQUENT_MODIFICATION | 177 | -0.250579298 | -1.305830506 | 0.038659236 | 0.176641782 | 0.138741083 | 5215 | tags=25% | list=15% | signal=22% | Sptan1/Tmed9/Kdelr1/St8sia3/Tubb1/Sec23a/Copz1/Lman2/Tubb2a/Dctn6/Arf4/Cga/Csnk1d/Cog2/Arfgap1/Ppp6c/Rab1b/Dctn2/Trappc1/B4galt1/Sec23ip/Sec13/Nsf/Sptbn2/Bet1l/Napa/B4galt6/Cog5/Lman2l/Arf3/Tmem115/Man1a/Dynll1/Sptb/Sec24d/Fut8/Arf5/Tbc1d20/Capzb/Capza2/B4galt4/Mgat4b/Arf1/Gria1/Cnih2 |
| WP_CHEMOKINE_SIGNALING_PATHWAY | WP_CHEMOKINE_SIGNALING_PATHWAY | 171 | 0.282963505 | 1.302385301 | 0.038359788 | 0.176641782 | 0.138741083 | 4305 | tags=22% | list=12% | signal=20% | Pik3r3/Pik3ca/Shc3/Elmo1/Prkacb/Sos2/Adcy8/Pik3cd/Arrb1/Pik3r1/Stat5b/Crkl/Rasgrp2/Plcb4/Adcy5/Gsk3b/Csk/Pak1/Gnb1/Nras/Gnb4/Adcy6/Nfkbib/Stat2/Shc4/Ccr10/Gng4/Kras/Jak2/Ikbkb/Grk5/Vav2/Adcy3/Cxcl10/Gng3/Shc1/Grk2/Gnai2 |
| REACTOME_TP53_REGULATES_METABOLIC_GENES | REACTOME_TP53_REGULATES_METABOLIC_GENES | 71 | 0.349940181 | 1.424868633 | 0.039019424 | 0.176671282 | 0.138764254 | 4844 | tags=28% | list=14% | signal=24% | Tsc1/Rragc/Cox7b/Sesn3/Prkaa2/Slc38a9/Gls2/Cox11/G6pdx/Cox6b1/Sco1/Surf1/Txn1/Cycs/Cox5a/Cox4i1/Rptor/Prdx2/Ndufa4/Lamtor5 |
| REACTOME_CDC42_GTPASE_CYCLE | REACTOME_CDC42_GTPASE_CYCLE | 94 | 0.327344879 | 1.388889133 | 0.038915579 | 0.176671282 | 0.138764254 | 3953 | tags=28% | list=11% | signal=25% | Mcf2/Ralbp1/Dlc1/Arhgef15/Racgap1/Pik3r1/Arhgap32/Arhgap35/Arhgef16/Ktn1/Farp1/Arhgap31/Arhgap22/Arhgap26/Arhgap42/Gna13/Arhgap5/Arhgdig/Fam13b/Srgap2/Gmip/Syde1/Srgap1/Arap2/Vav2/Itsn1 |
| REACTOME_MYD88_INDEPENDENT_TLR4_CASCADE | REACTOME_MYD88_INDEPENDENT_TLR4_CASCADE | 100 | 0.31145443 | 1.338247699 | 0.039215686 | 0.176797578 | 0.138863451 | 7416 | tags=34% | list=21% | signal=27% | Mapk9/Nkiras1/Mapk8/Birc2/Ppp2cb/Rps6ka3/Mapk11/App/Nfkbib/S100b/Tifa/Ubc/N4bp1/Nod2/Ikbkb/Atf2/Fos/Usp18/Ppp2r1b/Rps6ka5/Traf2/Irf7/Creb1/Lrrc14/Rela/Usp14/Irf3/Ikbkg/Map2k3/Map2k7/Mapkapk2/Cul1/Ripk1/Nlrc5 |
| WP_EGFR1_SIGNALING_PATHWAY | WP_EGFR1_SIGNALING_PATHWAY | 175 | 0.282574935 | 1.308113835 | 0.03931848 | 0.176797578 | 0.138863451 | 5249 | tags=31% | list=15% | signal=26% | Mcf2/Pik3r3/Pik3ca/Ralbp1/Sos2/Rgs16/Tnk2/Ctnnd1/Stxbp1/Pik3cd/Smad2/Rfxank/Ptpn5/Pik3r1/Stat5b/Gab2/Mapk8/Grb10/Crkl/Pitpna/Asap1/Map3k14/Usp6nl/Egfr/Csk/Rps6ka3/Pak1/Sh2d3c/Cav2/Sp1/Nras/Stat2/Ralb/Kras/Hip1/Jak2/Krt7/Sh3kbp1/Grb7/Gja1/Krt17/Shoc2/Fos/Vav2/Pkn2/Prkar1a/Shc1/Rps6ka5/Hat1/Itch/Creb1/Plcg1/Stat1/Klf11 |
| REACTOME_TBC_RABGAPS | REACTOME_TBC_RABGAPS | 34 | 0.434658448 | 1.502090379 | 0.039745628 | 0.17810412 | 0.139889658 | 7872 | tags=47% | list=23% | signal=36% | Tsc1/Optn/Map1lc3b/Rab11b/Sytl1/Ulk1/Rab11a/Arf6/Rab33a/Rab4a/Tbc1d17/Rab8a/Tbc1d16/Rab6b/Tbc1d7/Gabarapl2 |
| REACTOME_KSRP_KHSRP_BINDS_AND_DESTABILIZES_MRNA | REACTOME_KSRP_KHSRP_BINDS_AND_DESTABILIZES_MRNA | 15 | -0.508794174 | -1.556341291 | 0.040163671 | 0.178987183 | 0.140583249 | 2728 | tags=53% | list=8% | signal=49% | Exosc6/Exosc8/Exosc1/Dis3/Exosc4/Khsrp/Parn/Ywhaz |
[truncated: 11,275 more chars]
